# Supplementary material
Source: PubMed Central journal article supplement (PMC7594304)

# Supporting Information

## *trans*-Selective and Switchable Arene Hydrogenation of Phenol Derivatives

Marco Wollenburg<sup>‡</sup>, Arne Heusler<sup>‡</sup>, Klaus Bergander, Frank Glorius\*

Organisch-Chemisches Institut, Westfälische Wilhelms-Universität Münster,  
Corrensstraße 40, 48149 Münster, Germany

\*E-Mail: glorius@uni-muenster.de

### Table of Contents

|                                                              |      |
|--------------------------------------------------------------|------|
| 1. Materials and Methods.....                                | S2   |
| 2. Preparation of Starting Materials .....                   | S4   |
| 3. Optimization of Reaction Conditions .....                 | S4   |
| 4. Synthesis of <i>trans</i> -configured Cyclohexanols ..... | S13  |
| 4.1 Scale-up Hydrogenation.....                              | S38  |
| 5. Synthesis of <i>cis</i> -configured Cyclohexanols .....   | S41  |
| 6. Synthesis of Cyclohexanones.....                          | S51  |
| 7. Application.....                                          | S55  |
| 8. X-ray Diffraction Data.....                               | S57  |
| 9. Mechanistic Studies .....                                 | S61  |
| 10. Reaction-Condition Based Sensitivity Assessment.....     | S69  |
| 11. References .....                                         | S72  |
| 12. NMR Spectra.....                                         | S74  |
| 11.1 <i>trans</i> -Cyclohexanols.....                        | S74  |
| 11.2 <i>cis</i> -Cyclohexanols .....                         | S95  |
| 11.3 Cyclohexanones .....                                    | S106 |
| 11.4 Application .....                                       | S112 |

## 1. Materials and Methods

Unless otherwise noted, all reactions were carried out under an atmosphere of argon in oven-dried glassware. Reaction temperatures are reported as the temperature of the bath / metal block surrounding the vessel unless otherwise stated. The solvents used were purified by distillation over the drying agents indicated in parentheses: *n*-hexane (CaH<sub>2</sub>), dichloromethane (CaH<sub>2</sub>), diethylether (Na-benzophenone), THF (Na-benzophenone). Dichloroethane (4Å), 1,4-dioxane (4Å), ethyl acetate (4Å), methanol (3Å) and ethanol (4Å) were purchased as dry solvents from commercial suppliers and stored over molecular sieves. *n*-Heptane (Acros Organics, 99+%) and *iso*-propanol (Fisher Scientific, 99.8%) were used as received from supplier.

All hydrogenation reactions were carried out in Berghof High Pressure Reactors using hydrogen gas. Commercially available chemicals were obtained from Acros Organics, Aldrich Chemical Co., Strem Chemicals, Alfa Aesar, ABCR, Combi-Blocks, Chempur and TCI Europe and used as received unless otherwise stated. Palladium/Al<sub>2</sub>O<sub>3</sub> was obtained from Johnson Matthey 5 wt% Palladium on alumina A302099-5; CODE: S4020; 10 g on dry basis; Lot: C-15059; JM Order: 7248; % water: 2.01. Analytical thin layer chromatography was performed on Polygram SIL G/UV254 plates. Visualization was accomplished with short wave UV light, and/or KMnO<sub>4</sub> and ninhydrin staining solutions followed by heating. Flash chromatography was performed on Merck silica gel (40–63 mesh) by standard technique eluting with solvents as indicated.

GC-MS spectra were recorded on an Agilent Technologies 7890A GC-system with an Agilent 5975C VL MSD or an Agilent 5975 inert Mass Selective Detector (EI) and a HP-5MS column (0.25 mm x 30 m, film: 0.25 μm). The major signals are quoted in *m/z* with the relative intensity in parentheses. The method indicated as '50\_40' starts with the injection temperature T<sub>0</sub> (50 °C); after holding this temperature for 3 min, the column is heated by 40 °C/min to temperature T<sub>1</sub> (290 °C or 320 °C). GC-FID analysis was undertaken on an Agilent Technologies 6890A equipped with an HP-5 quartz column (0.32 mm x 30 m, film: 0.25 μm) using flame ionization detection. Method: Initial temperature 50 °C, hold 3 min, increment 40 °C/min, final temperature 280 °C, hold 3 min. High resolution mass spectra (HRMS) were obtained by the MS service of the OrganischChemisches Institut, Westfälische Wilhelms-Universität Münster, using electrospray ionisation (ESI) on a Bruker Daltonics MicroTof spectrometer. Infrared spectra were recorded on a Shimadzu FTIR 8400S spectrometer as neat compound. The wave numbers ( $\tilde{\nu}$ ) of recorded IR-signals are quoted in cm<sup>-1</sup>.

<sup>1</sup>H and <sup>13</sup>C, <sup>19</sup>F and <sup>11</sup>B NMR spectra were recorded on a Bruker AV 300 or AV 400, Varian 500 MHz INOVA or Varian Unity plus 600 in the indicated solvents. Chemical shifts ( $\delta$ ) are given in ppm relative to TMS. The residual solvent signals were used as references and the

chemical shifts converted to the TMS scale (CDCl<sub>3</sub>:  $\delta_{\text{H}} = 7.26$  ppm,  $\delta_{\text{C}} = 77.16$  ppm; methanol-*d*<sub>4</sub>:  $\delta_{\text{H}} = 3.31$  ppm,  $\delta_{\text{C}} = 49.00$  ppm; acetone-*d*<sub>6</sub>:  $\delta_{\text{H}} = 2.05$  ppm,  $\delta_{\text{C}} = 29.84$  ppm; CD<sub>3</sub>CN:  $\delta_{\text{H}} = 1.94$  ppm,  $\delta_{\text{C}} = 1.32$  ppm; toluene-*d*<sub>8</sub>:  $\delta_{\text{H}} = 7.09, 7.01, 6.97$  and  $2.08$  ppm,  $\delta_{\text{C}} = 137.48, 128.87, 127.96, 125.13$  and  $20.43$  ppm; DMSO-*d*<sub>6</sub>:  $\delta_{\text{H}} = 2.50$  ppm,  $\delta_{\text{C}} = 39.52$  ppm). <sup>19</sup>F and <sup>11</sup>B NMR spectra are not calibrated by an internal reference. The multiplicities of the signals are reported as s (singlet), bs (broad singlet), d (doublet), t (triplet), q (quartet), p (pentet), hept (heptet) and m (multiplet). Coupling constants (*J*) are quoted in Hz.

Data sets for compounds **2f**, **2q**, **2m** and **2o** were collected with a Bruker D8 Venture CMOS diffractometer. Programs used: data collection: APEX3 V2016.1-0<sup>1</sup> (Bruker AXS Inc., **2016**); cell refinement: SAINT V8.37A (Bruker AXS Inc., **2015**); data reduction: SAINT V8.37A (Bruker AXS Inc., **2015**); absorption correction, SADABS V2014/7 (Bruker AXS Inc., **2014**); structure solution *SHELXT-2015*<sup>2</sup> (Sheldrick, G. M. *Acta Cryst.*, **2015**, *A71*, 3-8); structure refinement *SHELXL-2015*<sup>3</sup> (Sheldrick, G. M. *Acta Cryst.*, **2015**, *C71* (1), 3-8) and graphics, *XP*<sup>4</sup> (Version 5.1, Bruker AXS Inc., Madison, Wisconsin, USA, **1998**). *R*-values are given for observed reflections, and *wR*<sup>2</sup> values are given for all reflections.

---

<sup>1</sup>APEX3 (**2016**), SAINT (**2015**) and SADABS (**2015**), Bruker AXS Inc., Madison, Wisconsin, USA.

<sup>2</sup> Sheldrick, G. M., *SHELXT – Integrated space-group and crystal-structure determination*, *Acta Cryst.*, **2015**, *A71*, 3-8.

<sup>3</sup> Sheldrick, G.M., *Crystal structure refinement with SHELXL*, *Acta Cryst.*, **2015**, *C71* (1), 3-8.

<sup>4</sup> *XP – Interactive molecular graphics, Version 5.1*, Bruker AXS Inc., Madison, Wisconsin, USA, **1998**.

## 2. Preparation of Starting Materials

All used starting materials are commercially available and were used without further purification.

## 3. Optimization of Reaction Conditions

### *General Procedure*

A 4 mL screw-cap glass vial, equipped with a magnetic stirring bar, was charged with catalyst, *p*-cresol (0.1 mmol, 1.0 equiv.) and solvent (as indicated, 1.0 mL). The prepared glass vial was placed in a 150 mL stainless steel autoclave under air. The autoclave was pressurized and depressurized with hydrogen gas three times before the indicated pressure was set. The reaction mixture was stirred at the indicated temperature overnight. After the autoclave was carefully depressurized, DMAP (0.01 mmol, 0.1 equiv.), imidazole (0.45 mmol, 4.5 equiv.), TBSCl (0.3 mmol, 3.0 equiv.) and dichloromethane (1.0 mL, 0.1 M) were added and the mixture was stirred at 40 °C overnight. After full conversion of the cyclohexanol to the corresponding silylether (indicated by GC-MS analysis), mesitylene (14  $\mu$ L, 0.101 mmol) was added as internal standard and the mixture was stirred vigorously for 5 min. After filtration over Whatman® filter, conversion, yield and diastereomeric ratio (d.r.) were determined by GC-FID analysis.

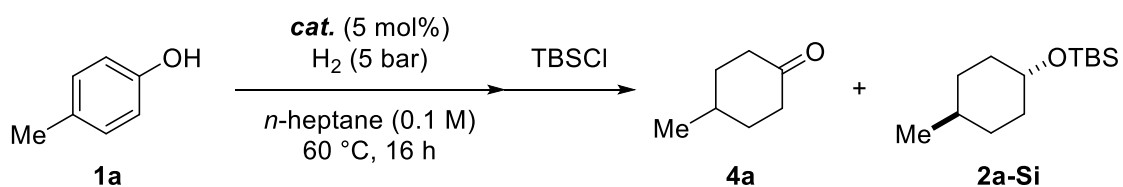

**Table S1.** Screening of palladium catalysts.

| entry | catalyst                                  | conversion [%] | yield <b>4a</b> [%] | yield <b>2a-Si</b> [%] (d.r.) |
|-------|-------------------------------------------|----------------|---------------------|-------------------------------|
| 1     | 5 wt% Pd/C                                | 100            | 31                  | 69 (69:31)                    |
| 2     | 5 wt% Pd/C <sub>ox.</sub>                 | 100            | traces              | 98 (50:50)                    |
| 3     | 5 wt% Pd/Al <sub>2</sub> O <sub>3</sub>   | 100            | 0                   | 99 (79:21)                    |
| 4     | 0.5 wt% Pd/Al <sub>2</sub> O <sub>3</sub> | 100            | traces              | 96 (81:19)                    |
| 5     | 5 wt% Pd/SiO <sub>2</sub>                 | 77             | 77                  | 0                             |
| 6     | 5 wt% Pd/CaCO <sub>3</sub>                | 70             | 60                  | 10 (61:39)                    |
| 7     | 20 wt% Pd(OH) <sub>2</sub> /C             | 100            | 48                  | 52(40:60)                     |

Reaction conditions: **1a** (0.1 mmol, 1.0 equiv.), *n*-heptane (1.0 mL, 0.1 M). TBS-protection after hydrogenation. Conversion of *p*-cresol. Yields and d.r. values (*trans/cis*) determined by GC-FID analysis using mesitylene as internal standard.

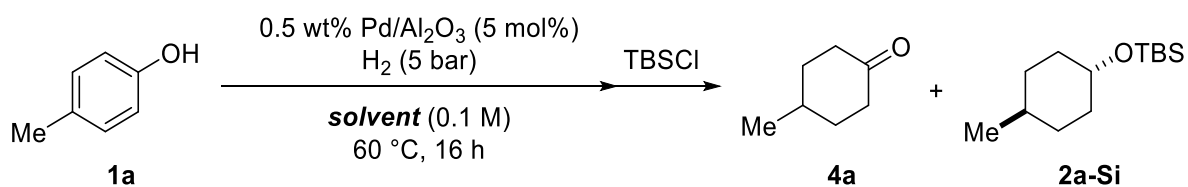

**Table S2.** Screening of solvents

| entry             | solvent           | conversion [%] | yield <b>4a</b> [%] | yield <b>2a-Si</b> [%] (d.r.) |
|-------------------|-------------------|----------------|---------------------|-------------------------------|
| 1                 | 1,4-dioxane       | 90             | 30                  | 60 (77:23)                    |
| 2                 | DCE               | 100            | 85                  | 15 (50:50)                    |
| 3                 | toluene           | 60             | 51                  | traces                        |
| 4                 | CHCl <sub>3</sub> | traces         | traces              | 0                             |
| 5                 | MTBE              | 100            | 0                   | 99 (81:19)                    |
| 6                 | THF               | 86             | 32                  | traces                        |
| 7                 | PhCF <sub>3</sub> | 99             | 87                  | 12 (68:32)                    |
| 8                 | cyclohexane       | 100            | traces              | 98 (83:17)                    |
| 9                 | <i>n</i> -heptane | 100            | traces              | 96 (81:19)                    |
| 10 <sup>[a]</sup> | EtOH              | 32             | traces              | 24 (75:25)                    |
| 11 <sup>[a]</sup> | TFE               | 100            | traces              | 95 (77:23)                    |
| 12                | AcOH              | 100            | 0                   | 99 (n.d.)                     |
| 13                | NEt <sub>3</sub>  | no conv.       | 0                   | 0                             |

Reaction conditions: **1a** (0.1 mmol, 1.0 equiv.), solvent (1.0 mL, 0.1 M). TBS-protection after hydrogenation. Conversion of *p*-cresol. Yields and d.r. values (*trans/cis*) determined by GC-FID analysis using mesitylene as internal standard. <sup>[a]</sup> 2 mol% catalyst loading.

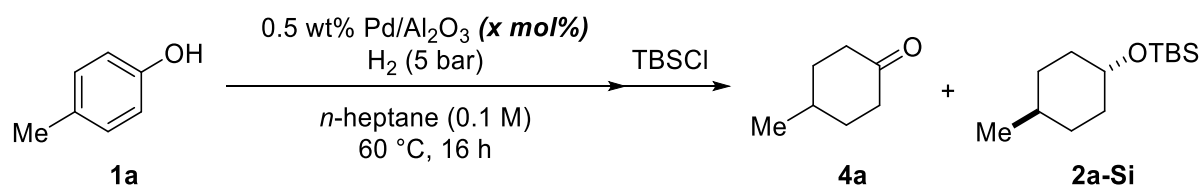

**Table S3.** Screening of catalyst loading.

| entry | catalyst loading | conversion [%] | yield <b>4a</b> [%] | yield <b>2a-Si</b> [%] (d.r.) |
|-------|------------------|----------------|---------------------|-------------------------------|
| 1     | 10 mol%          | 100            | 0                   | 99 (81:19)                    |
| 2     | 2 mol%           | 100            | 0                   | 99 (81:19)                    |
| 3     | 1 mol%           | 100            | 50                  | 50 (75:25)                    |

Reaction conditions: **1a** (0.1 mmol, 1.0 equiv.), solvent (1.0 mL, 0.1 M). TBS-protection after hydrogenation. Conversion of *p*-cresol. Yields and d.r. values (*trans/cis*) determined by GC-FID analysis using mesitylene as internal standard.

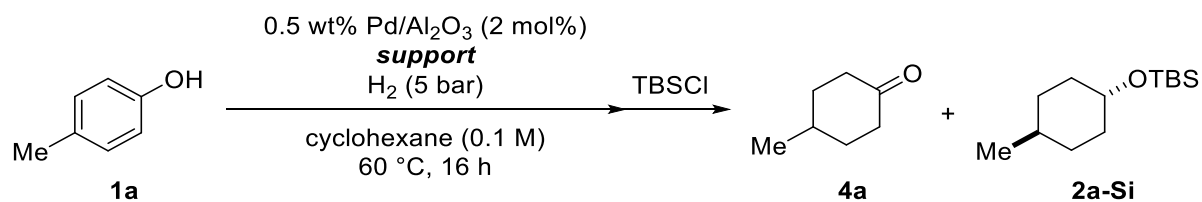

**Table S4.** Screening of additional catalyst supports.

| entry             | support                                        | conversion [%] | yield <b>4a</b> [%] | yield <b>2a-Si</b> [%] (d.r.) |
|-------------------|------------------------------------------------|----------------|---------------------|-------------------------------|
| 1                 | SiO <sub>2</sub> (50 mg)                       | 100            | traces              | 97 (84:16)                    |
| 2                 | neutral Al <sub>2</sub> O <sub>3</sub> (50 mg) | 100            | traces              | 98 (81:19)                    |
| 3                 | basic Al <sub>2</sub> O <sub>3</sub> (50 mg)   | 100            | 0                   | 99 (80:20)                    |
| 4                 | acidic Al <sub>2</sub> O <sub>3</sub> (50 mg)  | 100            | 0                   | 99 (80:20)                    |
| 5                 | crushed 4Å MS (50 mg)                          | 100            | 0                   | 99 (79:21)                    |
| 6                 | 4Å MS (50 mg)                                  | 99             | traces              | 98 (74:26)                    |
| 7                 | TiO <sub>2</sub> (25 mg)                       | 100            | traces              | 97 (79:21)                    |
| 8                 | SiO <sub>2</sub> (25 mg)                       | 100            | traces              | 98 (80:20)                    |
| 9                 | SiO <sub>2</sub> (100 mg)                      | 100            | 11                  | 89 (80:20)                    |
| 10 <sup>[a]</sup> | AcOH                                           | 100            | 66                  | 34 (68:32)                    |

Reaction conditions: **1a** (0.1 mmol, 1.0 equiv.), solvent (1.0 mL, 0.1 M). TBS-protection after hydrogenation. Conversion of *p*-cresol. Yields and d.r. values (*trans/cis*) determined by GC-FID analysis using mesitylene as internal standard. <sup>[a]</sup>AcOH (1 Vol%) was added.



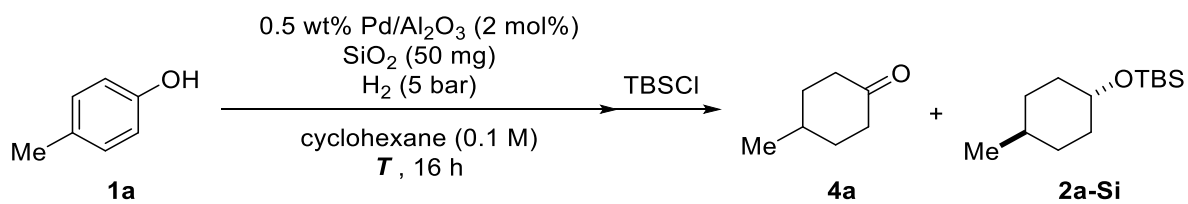

**Table S5.** Screening of temperature.

| entry | temperature | conversion [%] | yield <b>4a</b> [%] | yield <b>2a-Si</b> [%] (d.r.) |
|-------|-------------|----------------|---------------------|-------------------------------|
| 1     | 40 °C       | 99             | 38                  | 61 (80:20)                    |
| 2     | 50 °C       | 100            | 0                   | 99 (77:23)                    |
| 3     | 80 °C       | 100            | 0                   | 99 (77:23)                    |

Reaction conditions: **1a** (0.1 mmol, 1.0 equiv.), solvent (1.0 mL, 0.1 M). TBS-protection after hydrogenation. Conversion of *p*-cresol. Yields and d.r. values (*trans/cis*) determined by GC-FID analysis using mesitylene as internal standard.

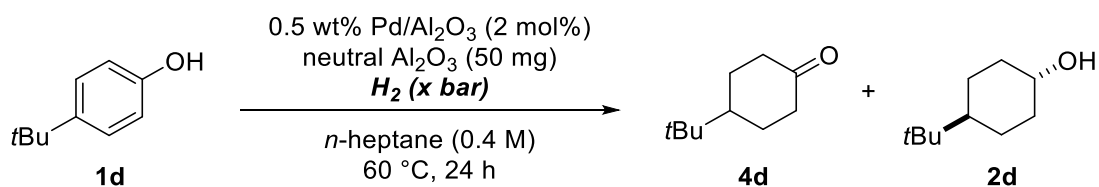

**Table S6.** Screening of hydrogen pressure.

| entry            | H <sub>2</sub> (bar) | conversion [%] | yield <b>4d</b> [%] | yield <b>2d</b> [%] (d.r.) |
|------------------|----------------------|----------------|---------------------|----------------------------|
| 1                | 5                    | 100            | traces              | 98 (88:12)                 |
| 2                | 3                    | 100            | 16                  | 84 (86:14)                 |
| 3 <sup>[a]</sup> | 5                    | 100            | traces              | 99 (88:12)                 |

Reaction conditions: **1d** (0.4 mmol, 1.0 equiv.), solvent (1.0 mL, 0.4 M). Yields and d.r. values (*trans/cis*) determined by GC-FID analysis using mesitylene as internal standard. <sup>[a]</sup> 5 wt% Pd/Al<sub>2</sub>O<sub>3</sub> without additional neutral Al<sub>2</sub>O<sub>3</sub> at 80 °C.

Due to significant amounts of insoluble solids in the process of up-scaling (0.4 mmol) when employing 0.5 wt% Pd/Al<sub>2</sub>O<sub>3</sub> (2 mol%) and additional neutral alumina (>200 mg in 1.0 mL solvent), the reproducibility of the reaction was low. Therefore, we decided to reduce the quantities of solids, which restored reproducibility and diastereoselectivity.

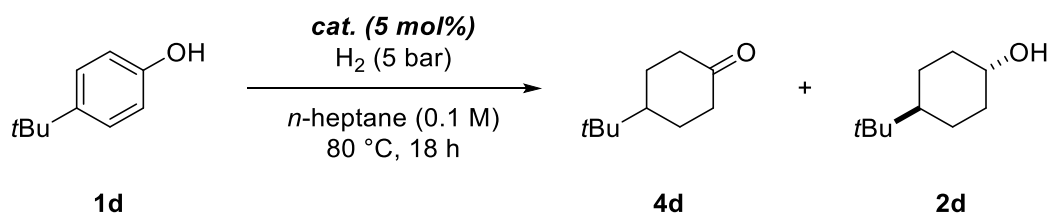

**Table S7.** Screening of other metal-supported heterogeneous catalysts.

| entry | catalyst (5 mol%)                       | conv. of SM [%] | yield <b>4d</b> [%] | yield <b>2d</b> [%] (d.r.) |
|-------|-----------------------------------------|-----------------|---------------------|----------------------------|
| 1     | 5 wt% Ru/Al <sub>2</sub> O <sub>3</sub> | 100             | -                   | 87 (60:40)                 |
| 2     | 5 wt% Ru/AC                             | 100             | -                   | 89 (65:35)                 |
| 3     | 5 wt% Pt/Al <sub>2</sub> O <sub>3</sub> | 100             | -                   | 78 (80:20)                 |
| 4     | 5 wt% Rh/AC                             | 100             | -                   | 92 (10:90)                 |

Reaction conditions: **1d** (0.1 mmol, 1.0 equiv.), solvent (1.0 mL, 0.1 M). Yields and d.r. values (*trans/cis*) determined by GC-FID analysis using mesitylene as internal standard. AC = activated carbon.

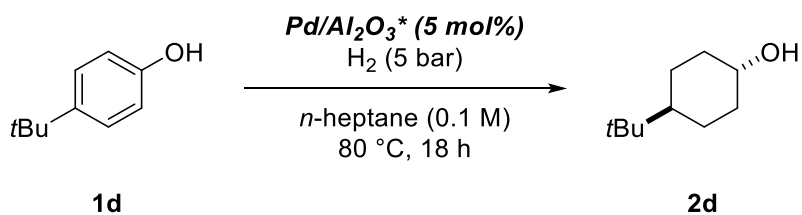

**Table S8.** Reproducibility of the reaction with Pd/Al<sub>2</sub>O<sub>3</sub> from different suppliers.

| entry            | catalyst                                                                            | supplier        | conv. of SM [%]  | yield <b>2d</b> [%] (d.r.) |
|------------------|-------------------------------------------------------------------------------------|-----------------|------------------|----------------------------|
| 1 <sup>[a]</sup> | 5 wt% Pd/Al <sub>2</sub> O <sub>3</sub>                                             | Johnson Matthey | 100              | 92 (88:12)                 |
| 2                | 5 wt% Pd/Al <sub>2</sub> O <sub>3</sub><br>powder, dry                              | Acros Organics  | 100              | 87 (88:12)                 |
| 3                | 5 wt% Pd/Al <sub>2</sub> O <sub>3</sub><br>reduced, dry powder                      | ABCR            | 4 <sup>[b]</sup> | -                          |
| 4                | 5 wt% Pd/Al <sub>2</sub> O <sub>3</sub><br>reduced, dry (Escat 1241)<br>lot 1386628 | ABCR            | 100              | 98 (88:12)                 |
| 5                | 5 wt% Pd/Al <sub>2</sub> O <sub>3</sub><br>reduced, dry (Escat 1241)<br>lot 1349664 | ABCR            | 100              | 98 (86:14)                 |
| 6                | 0.5 wt% Pd/Al <sub>2</sub> O <sub>3</sub><br>reduced, pellets                       | ABCR            | 100              | 70 (84:16)                 |

Reaction conditions: **1d** (0.1 mmol, 1.0 equiv.), solvent (1.0 mL, 0.1 M). Yields and d.r. values (*trans/cis*) determined by GC-FID analysis using mesitylene as internal standard. <sup>[a]</sup> Standard catalyst, see “Materials and Methods” section for more details. <sup>[b]</sup> 4-*t*Bu-cyclohexanone was observed.

#### 4. Synthesis of *trans*-configured Cyclohexanols

General procedure A for the *trans*-selective hydrogenation of phenols

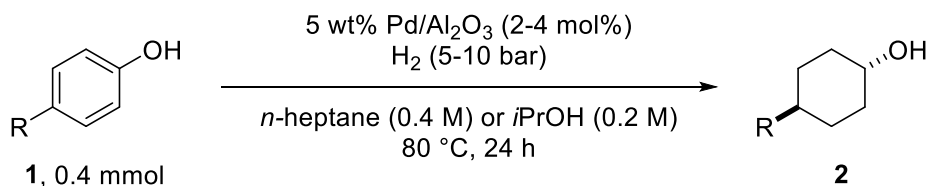

A 4 mL screw-cap glass vial, equipped with a magnetic stirring bar, was charged with 5 wt% Pd/Al<sub>2</sub>O<sub>3</sub> (2-4 mol%) and solid substrates (0.4 mmol, 1.0 equiv.) as indicated. Solvent (1.0 mL, 0.4 M) and liquid substrates were added. The prepared glass vial was placed in a 150 mL stainless steel autoclave under air. The autoclave was pressurized and depressurized with hydrogen gas three times before the indicated pressure was set. The reaction mixture was stirred at 80 °C for 24 h. After the autoclave was carefully depressurized, the crude mixture was purified by column chromatography on silica gel.

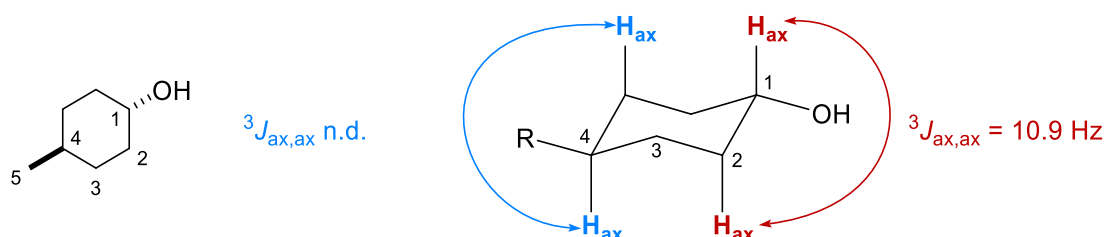

**2a**, colorless oil, procedure A: 2 mol% catalyst loading, 5 bar H<sub>2</sub>, solvent: *n*-heptane (0.4 M, 1.0 mL). Purification with 20% to 30% Et<sub>2</sub>O in pentane. 90% total yield, 80:20 d.r. (determined by <sup>1</sup>H NMR) The major diastereomer was isolated and characterized (74% yield). The hydroxy group occupies the equatorial position based on the  $^3J_{ax,ax}$  coupling between H<sub>ax</sub>C1 & H<sub>ax</sub>C2. The *J* coupling between H<sub>ax</sub>C4 & H<sub>ax</sub>C3 could not be determined due to overlapping multiplets. **<sup>1</sup>H NMR** (400 MHz, CDCl<sub>3</sub>) δ 3.54 (tt,  $^3J_{ax,ax} = 10.9$  Hz,  $^3J_{ax,eq} = 4.3$  Hz, 1H, H<sub>ax</sub>C1), 1.99 – 1.87 (m, 2H), 1.76 – 1.65 (m, 2H), 1.59 (bs, 1H, HO), 1.43 – 1.17 (m, 3H), 1.05 – 0.91 (m, 2H), 0.88 (d,  $^3J_{HH} = 6.6$  Hz, 3H);

**<sup>13</sup>C NMR** (101 MHz, CDCl<sub>3</sub>) δ 67.1, 32.4, 31.3, 29.1, 21.8;

**ESI-MS** calculated [C<sub>7</sub>H<sub>14</sub>O+Na]<sup>+</sup> 137.0937, found: 137.0921.

Analytical data are in good accordance with those previously reported for this compound.<sup>1</sup>

**2ac**, colorless oil, procedure A: 4 mol% catalyst loading, 10 bar H<sub>2</sub>, solvent: *n*-heptane (0.4 M, 1.0 mL). Purification with 10% to 20% Et<sub>2</sub>O in pentane. 82% total

yield, 55:45 d.r. determined by  $^1\text{H}$  NMR. The major diastereomer was isolated and characterized (44% yield).

$^1\text{H}$  NMR (400 MHz,  $\text{CDCl}_3$ )  $\delta$  3.11 (m, 1H,  $H_{\text{C1}}$ ), 1.99 – 1.89 (m, 1H), 1.82 – 1.66 (m, 4H), 1.65 – 1.54 (m, 1H), 1.34 – 1.12 (m, 4H), 1.00 (d,  $^3J_{\text{HH}} = 6.5$  Hz, 3H);

$^{13}\text{C}$  NMR (101 MHz,  $\text{CDCl}_3$ )  $\delta$  76.7, 40.4, 35.6, 33.8, 25.8, 25.3, 18.7;

ESI-MS calculated  $[\text{C}_7\text{H}_{14}\text{O}+\text{Na}]^+$  137.093, found: 137.0923.

Analytical data are in good accordance with those previously reported for this compound.<sup>1</sup>

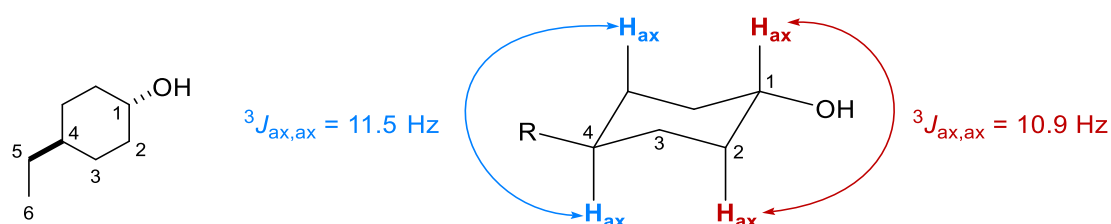

**2b**, colorless oil, procedure **A**: 2 mol% catalyst loading, 5 bar  $\text{H}_2$ , solvent: *n*-heptane (0.4 M, 1.0 mL). Purification with 5% to 10% Et<sub>2</sub>O in pentane. 87% total yield, 80:20 d.r. determined by GC-FID. The major diastereomer was isolated and characterized (59% yield). The *trans*-configuration was determined based on the  $^3J_{\text{ax,ax}}$  couplings between  $H_{\text{axC1}}$  &  $H_{\text{axC2}}$ , and  $H_{\text{axC4}}$  &  $H_{\text{axC3}}$ . Determination of  $^3J_{\text{ax,ax}}$  coupling between  $H_{\text{axC4}}$  &  $H_{\text{axC3}}$  was possible with homonuclear decoupling experiments by irradiation at  $H_2\text{C5}$ .

$^1\text{H}$  NMR (599 MHz,  $\text{CDCl}_3$ )  $\delta$  3.54 (tt,  $^3J_{\text{ax,ax}} = 10.9$  Hz,  $^3J_{\text{ax,eq}} = 4.3$  Hz, 1H,  $H_{\text{axC1}}$ ), 2.00 – 1.92 (m, 2H,  $H_{\text{C2}}$ ), 1.77 (dm,  $^2J_{\text{HH}} = 13.0$  Hz, 2H,  $H_{\text{eqC3}}$ ), 1.50 (bs, 1H,  $H_{\text{O}}$ ), 1.28 – 1.19 (m, 2H,  $H_{\text{C2}}$ ), 1.19 (q,  $^3J_{\text{HH}} = 7.1$  Hz, 2H,  $H_2\text{C5}$ ), 1.09 (tm,  $^3J_{\text{ax,ax}} = 11.5$  Hz, 1H,  $H_{\text{axC4}}$ ), 0.94 (ddd,  $^2J_{\text{HH}} = 13.4$  Hz,  $^3J_{\text{ax,ax}} = 11.0$  Hz,  $^3J_{\text{ax,eq}} = 2.6$  Hz, 2H,  $H_{\text{axC3}}$ ), 0.87 (t,  $^3J_{\text{HH}} = 7.5$  Hz, 3H,  $H_3\text{C6}$ );

$^{13}\text{C}$  NMR (151 MHz,  $\text{CDCl}_3$ )  $\delta$  71.4 (C1), 38.6 (C4), 35.8 (C2), 31.0 (C3), 29.4 (C5), 11.8 (C6);

ESI-MS calculated  $[\text{C}_8\text{H}_{16}\text{O}+\text{Na}]^+$ : 151.1093, found: 151.1093;

IR  $\tilde{\nu} = 3317, 2925, 2854, 1463, 1449, 1369, 1091, 1052, 1009, 964, 897, 862$ ;

Analytical data are in good accordance with those previously reported for this compound.<sup>1</sup>

GC-FID (prior to purification):

Pd-catalyzed (*trans*)

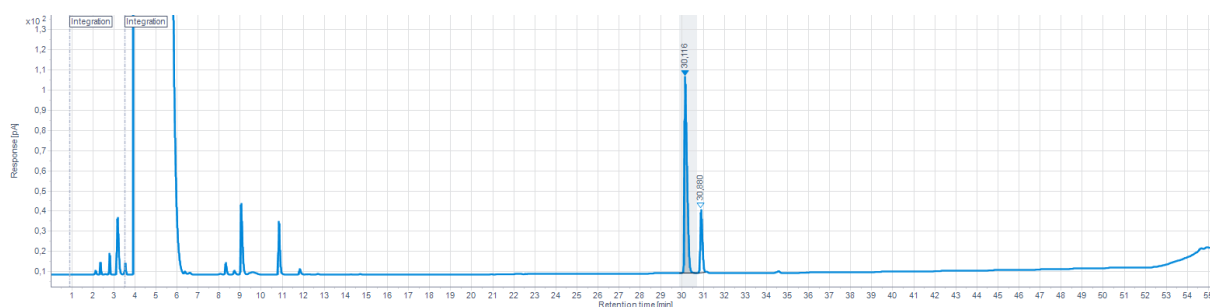

### Injection Results

| # | Name | Signal description | RT (min) | Area    | Area%  | Height | Height% | Amount | Concentration | Start time (min) | End time (min) |
|---|------|--------------------|----------|---------|--------|--------|---------|--------|---------------|------------------|----------------|
| 1 |      | FID1A              | 30,116   | 807,799 | 79,970 | 96,912 | 75,59   |        |               | 29,862           | 30,714         |
| 2 |      | FID1A              | 30,880   | 202,331 | 20,030 | 31,293 | 24,41   |        |               | 30,743           | 31,075         |

### Rh-catalyzed (*cis*)

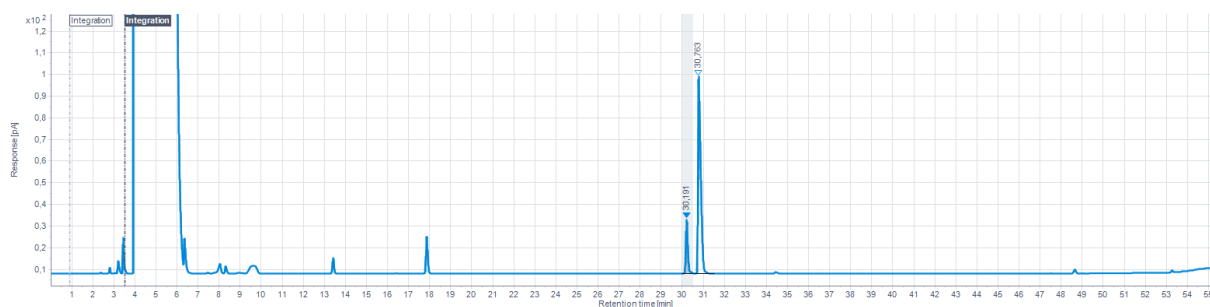

### Injection Results

| # | Name | Signal description | RT (min) | Area    | Area%  | Height | Height% | Amount | Concentration | Start time (min) | End time (min) |
|---|------|--------------------|----------|---------|--------|--------|---------|--------|---------------|------------------|----------------|
| 1 |      | FID1A              | 30,191   | 155,383 | 16,668 | 25,119 | 21,62   |        |               | 29,978           | 30,547         |
| 2 |      | FID1A              | 30,763   | 776,863 | 83,332 | 91,049 | 78,38   |        |               | 30,564           | 31,538         |

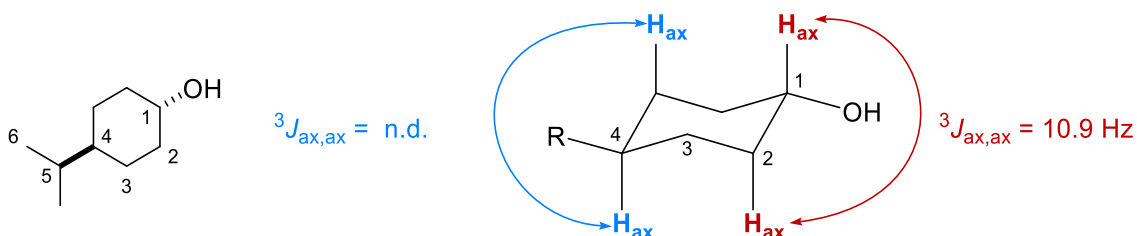

**2c**, colorless oil, 2 mol% catalyst loading, 5 bar H<sub>2</sub>, solvent: *n*-heptane (0.4 M, 1.0 mL). Purification with 10% to 20% EtOAc in pentane. 88% total yield, 87:13 d.r. determined by GC-MS. The major diastereomer was isolated and characterized (73% yield). The hydroxy group occupies the equatorial position based on the <sup>3</sup>J<sub>ax,ax</sub> coupling between H<sub>ax</sub>C1 & H<sub>ax</sub>C2. The *J* coupling between H<sub>ax</sub>C4 & H<sub>ax</sub>C3 could not be determined due to overlapping multiplets in several solvents (CDCl<sub>3</sub>, C<sub>6</sub>D<sub>6</sub>, CD<sub>3</sub>OD). Based on the confirmed *trans*-configuration for similar substrates with ethyl or *tert*-butyl groups and the bulkiness of *iso*-propyl compared to a hydroxy group, it seems very likely that the *iso*-propyl group occupies the equatorial position and the reported product is indeed the *trans*-diastereomer.

<sup>1</sup>H NMR (599 MHz, CDCl<sub>3</sub>) δ 3.51 (tt, <sup>3</sup>J<sub>ax,ax</sub> = 10.9 Hz, <sup>3</sup>J<sub>ax,eq</sub> = 4.4 Hz, 1H, H<sub>ax</sub>C1), 2.02 – 1.93 (m, 2H, H<sub>eq</sub>C2), 1.75 – 1.68 (m, 2H, H<sub>2</sub>C3), 1.59 (bs, 1H, HO), 1.41 (m, 1H, HC5), 1.21

(ddm,  $^2J_{\text{HH}} = 12.0$  Hz,  $^3J_{\text{ax,ax}} = 10.7$  Hz, 2H,  $H_{\text{axC2}}$ ), 1.05 – 0.97 (m, 3H,  $H_{\text{C4}}$ ,  $H_{\text{C3}}$ ), 0.84 (d,  $^3J_{\text{HH}} = 6.8$  Hz, 6H,  $H_{\text{C6}}$ );

$^{13}\text{C}$  NMR (151 MHz,  $\text{CDCl}_3$ )  $\delta$  71.4 (C1), 43.2 (C4), 35.9 (C2), 32.5 (C5), 28.0 (C3), 20.1 (C6);

ESI-MS calculated  $[\text{C}_9\text{H}_{18}\text{O}+\text{Na}]^+$ : 165.1250, found: 165.1251;

IR  $\tilde{\nu} = 3333, 2928, 2857, 1464, 1450, 1385, 1368, 1086, 1053, 991, 941, 897$ ;

GC-MS (prior to purification):

Pd-catalyzed (*trans*)

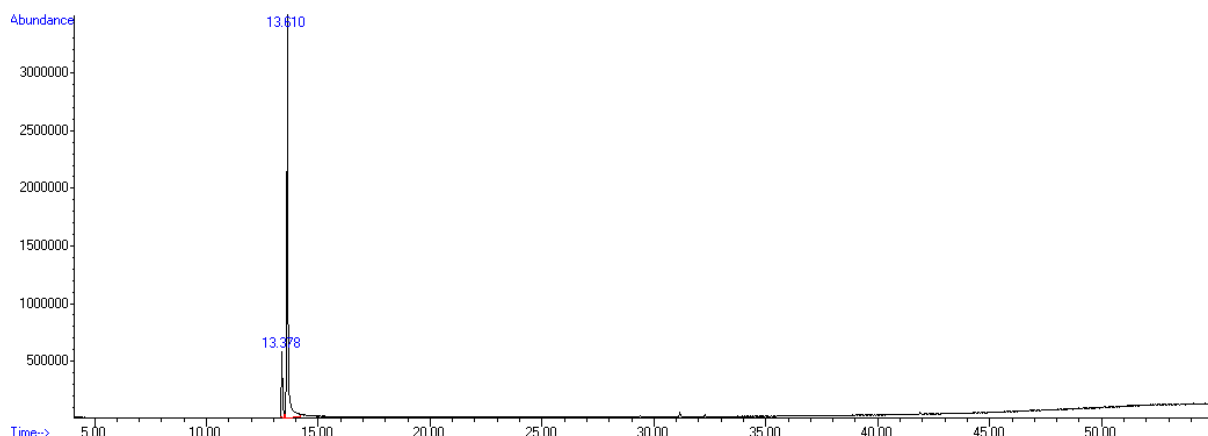

| peak # | R.T. min | first scan | max scan | last scan | PK TY | peak height | corr. area | corr. % max. | % of total |
|--------|----------|------------|----------|-----------|-------|-------------|------------|--------------|------------|
| 1      | 13.378   | 1576       | 1585     | 1600      | M     | 578101      | 17248177   | 14.50%       | 12.66%     |
| 2      | 13.610   | 1614       | 1625     | 1728      | M     | 3499425     | 118990683  | 100.00%      | 87.34%     |

Rh-catalyzed (*cis*)

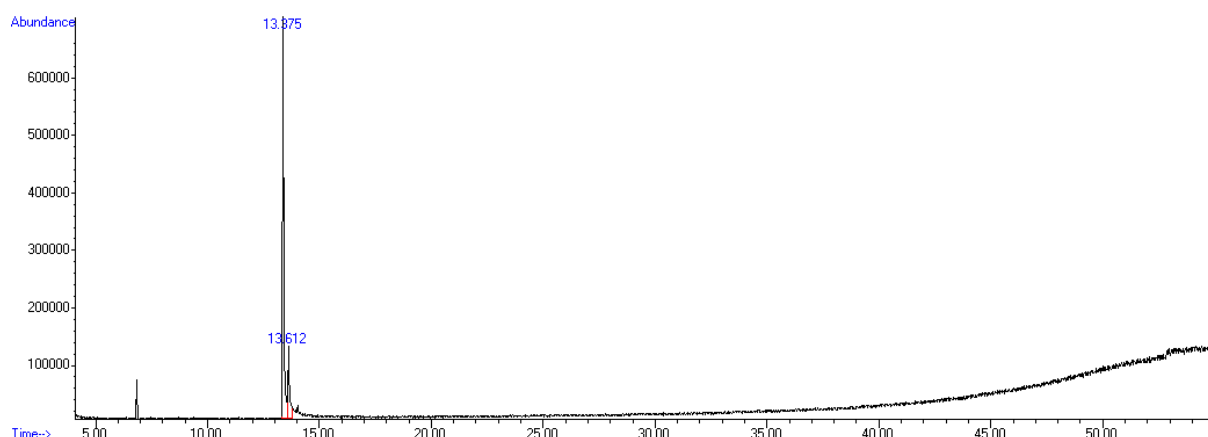

| peak # | R.T. min | first scan | max scan | last scan | PK TY | peak height | corr. area | corr. % max. | % of total |
|--------|----------|------------|----------|-----------|-------|-------------|------------|--------------|------------|
| 1      | 13.375   | 1575       | 1585     | 1617      | M2    | 698734      | 23717419   | 100.00%      | 79.26%     |
| 2      | 13.612   | 1617       | 1625     | 1654      | M4    | 123510      | 6204587    | 26.16%       | 20.73%     |



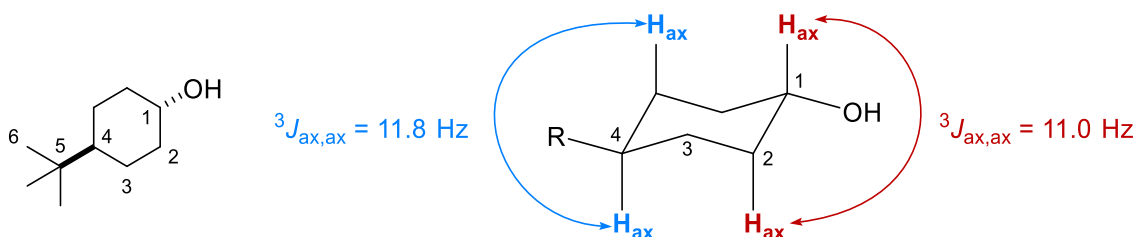

**2d**, white solid, procedure **A**: 2 mol% catalyst loading, 5 bar H<sub>2</sub>, solvent: *n*-heptane (0.4 M, 1.0 mL). Purification with 10% to 20% EtOAc in pentane. 90% total yield, 87:13 d.r. determined by GC-MS. The major diastereomer was isolated and characterized (75% yield). The *trans*-configuration was determined based on the <sup>3</sup>J<sub>ax,ax</sub> couplings between H<sub>ax</sub>C1 & H<sub>ax</sub>C2, and H<sub>ax</sub>C4 & H<sub>ax</sub>C3.

<sup>1</sup>H NMR (599 MHz, CDCl<sub>3</sub>) δ 3.51 (tt, <sup>3</sup>J<sub>ax,ax</sub> = 11.0 Hz, <sup>3</sup>J<sub>ax,eq</sub> = 4.4 Hz, 1H, H<sub>ax</sub>C1), 2.04 – 1.97 (m, 2H, H<sub>2eq</sub>C2), 1.81 – 1.74 (m, 2H, H<sub>2eq</sub>C3), 1.46 (bs, 1H, OH), 1.26 – 1.17 (m, 2H, H<sub>2ax</sub>C2), 1.09 – 1.00 (m, 2H, H<sub>2ax</sub>C3), 0.96 (tt, <sup>3</sup>J<sub>ax,ax</sub> = 11.8 Hz, <sup>3</sup>J<sub>ax,eq</sub> = 3.1 Hz, 1H, H<sub>ax</sub>C4), 0.84 (s, 9H, H<sub>3</sub>C6);

<sup>13</sup>C NMR (151 MHz, CDCl<sub>3</sub>) δ 71.4 (C1), 47.3 (C4), 36.2 (C2), 32.4 (C5), 27.8 (C6), 25.8 (C3);

ESI-MS calculated [C<sub>10</sub>H<sub>20</sub>O+Na]<sup>+</sup> 179.1406, found: 179.1403;

IR  $\tilde{\nu}$  = 3323, 2928, 2858, 1465, 1448, 1363, 1066, 1054, 1037, 981, 900;

Analytical data are in good accordance with those previously reported for this compound.<sup>1</sup>

GC-MS (prior to purification):

Pd-catalyzed (*trans*)

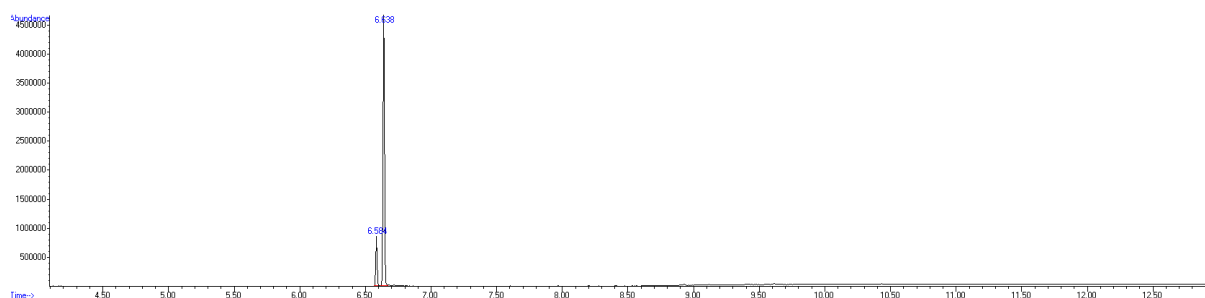

| peak # | R.T. min | first scan | max scan | last scan | PK TY | peak height | corr. area | corr. % max. | % of total |
|--------|----------|------------|----------|-----------|-------|-------------|------------|--------------|------------|
| 1      | 6.584    | 424        | 426      | 429       | M     | 839634      | 5832138    | 14.89%       | 12.963%    |
| 2      | 6.638    | 432        | 435      | 441       | M     | 4813697     | 39158240   | 100.00%      | 87.037%    |

Rh-catalyzed (*cis*)

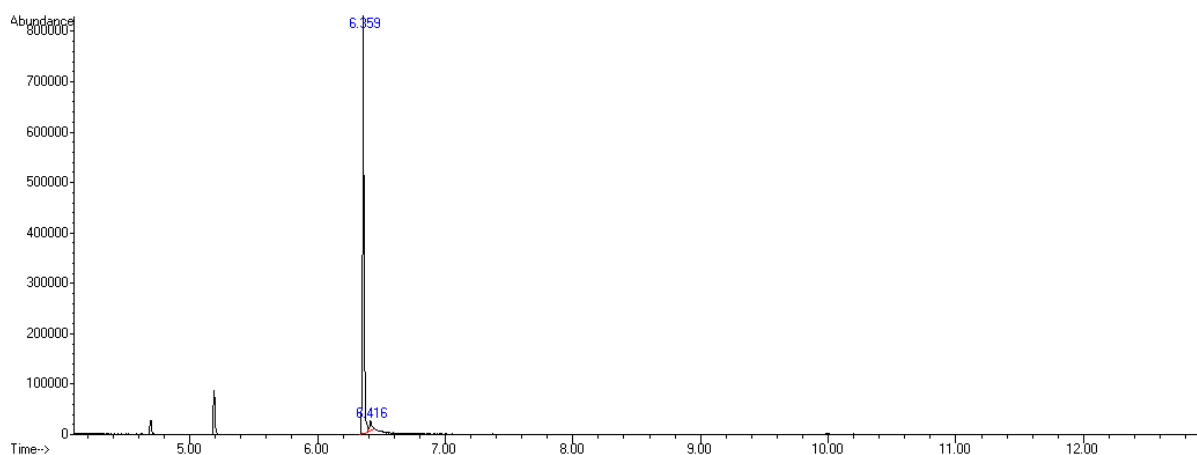

| peak # | R.T. min | first scan | max scan | last scan | PK TY | peak height | corr. area | corr. % max. | % of total |
|--------|----------|------------|----------|-----------|-------|-------------|------------|--------------|------------|
| 1      | 6.359    | 383        | 388      | 394       | M     | 855497      | 6529607    | 100.00%      | 93.283%    |
| 2      | 6.416    | 394        | 397      | 404       | M4    | 20459       | 470131     | 7.20%        | 6.717%     |

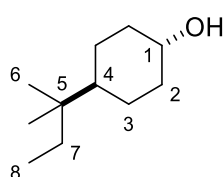

$${}^3J_{ax,ax} = \text{n.d.}$$

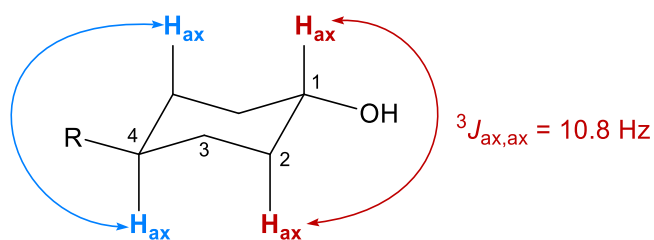

**2e**, white solid, 2 mol% catalyst loading, 5 bar  $H_2$ , solvent: *n*-heptane (0.4 M, 1.0 mL). Purification with 10% to 20% EtOAc in pentane. 99% total yield, 91:9 d.r. determined by GC-MS. The major diastereomer was isolated and characterized (91% yield). The hydroxy group occupies the equatorial position based on the  ${}^3J_{ax,ax}$  coupling between  $H_{ax}C1$  &  $H_{ax}C2$ . The  $J$  coupling between  $H_{ax}C4$  &  $H_{ax}C3$  could not be determined due to overlapping multiplets in several solvents ( $CDCl_3$ ,  $C_6D_6$ ,  $CD_3OD$ ). Based on the confirmed *trans*-configuration for similar substrates with ethyl or *tert*-butyl groups and the bulkiness of *tert*-amyl compared to a hydroxy group, it seems very likely that the *tert*-amyl group occupies the equatorial position and the reported product is indeed the *trans*-diastereomer.

${}^1H$  NMR (599 MHz,  $CDCl_3$ )  $\delta$  3.49 (tt,  ${}^3J_{ax,ax} = 11.0$  Hz,  ${}^3J_{ax,eq} = 4.4$  Hz, 1H,  $H_{ax}C1$ ), 2.02 – 1.95 (m, 2H,  $H_2C2$ ), 1.74 (bs, 1H, HO), 1.73 – 1.66 (m, 2H,  $H_2C3$ ), 1.23 (q,  ${}^3J_{HH} = 7.5$  Hz, 2H,  $H_2C7$ ), 1.19 (m, 2H,  $H_2C2$ ), 1.09 – 0.98 (m, 3H,  $H_{ax}C3$ , HC4), 0.77 (t,  ${}^3J_{HH} = 7.6$  Hz, 3H,  $H_3C8$ ), 0.76 (s, 6H,  $H_3C6$ );

${}^{13}C$  NMR (151 MHz,  $CDCl_3$ )  $\delta$  71.3 (C1), 44.5 (C4), 36.3 (C2), 34.7 (C5), 32.9 (C7), 25.3 (C3), 24.4 (C6), 8.2 (C8);

ESI-MS calculated  $[C_{11}H_{22}O+Na]^+$ : 193.1563, found: 193.1570;

IR  $\tilde{\nu}$  = 3300, 2930, 2861, 1451, 1379, 1364, 1121, 1069, 980, 899;

GC-MS (prior to purification):

Pd-catalyzed (*trans*)

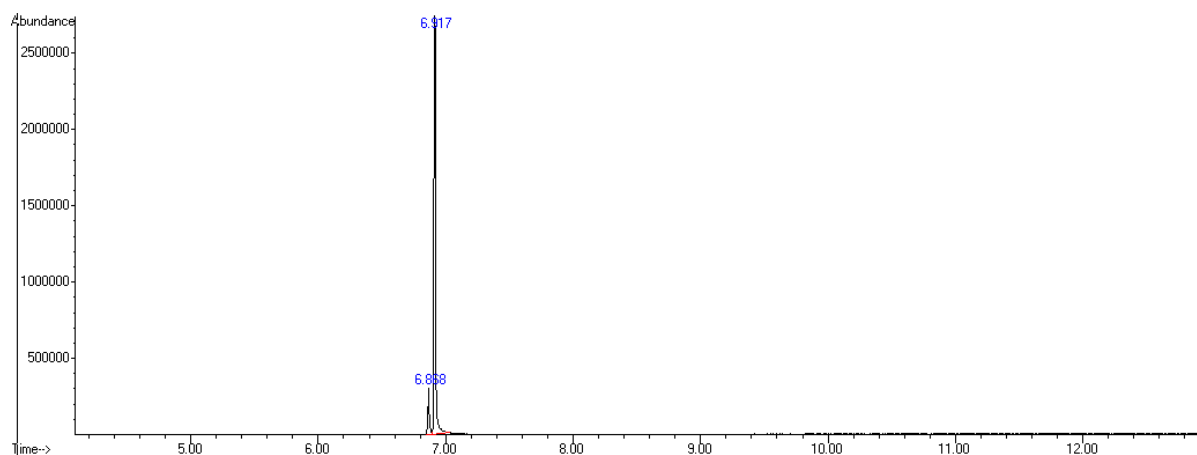

| peak # | R.T. min | first scan | max scan | last scan | PK TY | peak height | corr. area | corr. % max. | % of total |
|--------|----------|------------|----------|-----------|-------|-------------|------------|--------------|------------|
| 1      | 6.868    | 471        | 475      | 479       | BU    | 276506      | 2327469    | 9.44%        | 8.626%     |
| 2      | 6.917    | 479        | 483      | 503       | UB    | 2793858     | 24653473   | 100.00%      | 91.374%    |

Rh-catalyzed (*cis*)

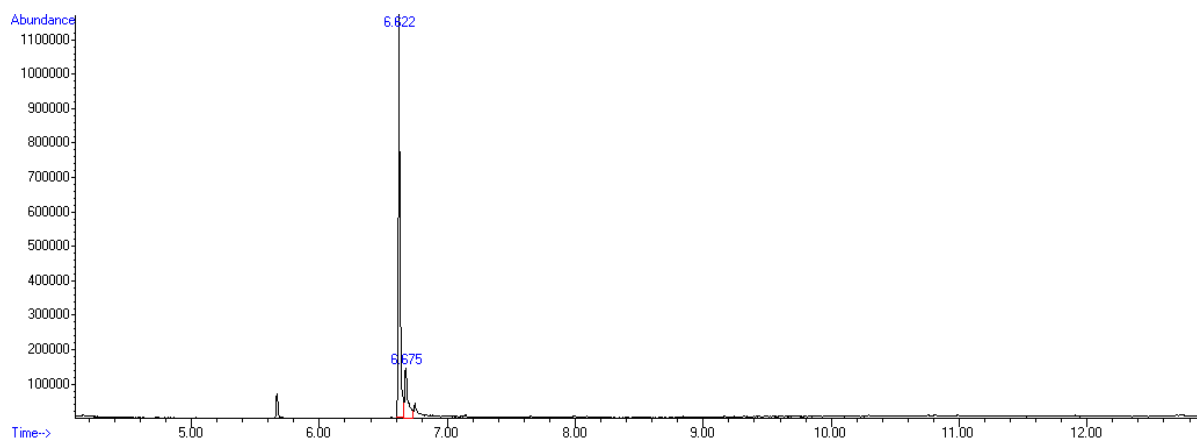

| peak # | R.T. min | first scan | max scan | last scan | PK TY | peak height | corr. area | corr. % max. | % of total |
|--------|----------|------------|----------|-----------|-------|-------------|------------|--------------|------------|
| 1      | 6.622    | 430        | 433      | 439       | M     | 1234362     | 10737152   | 100.00%      | 81.792%    |
| 2      | 6.675    | 439        | 442      | 451       | M     | 150402      | 2390224    | 22.26%       | 18.208%    |

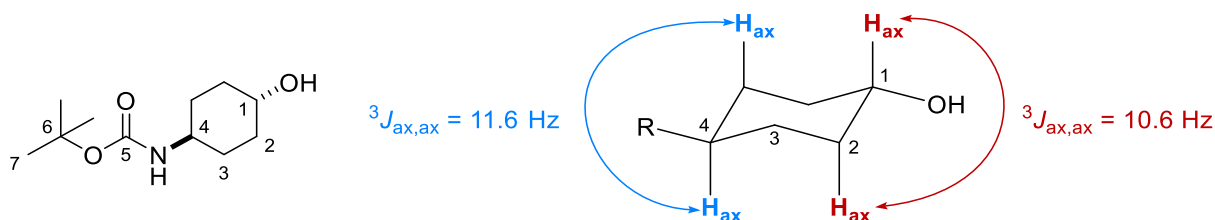

**2f**, white solid, 4 mol% catalyst loading, 10 bar H<sub>2</sub>, solvent: *n*-heptane (0.4 M, 1.0 mL), 48 h. Purification with 50% EtOAc in pentane. 84% total yield, 80:20 d.r. determined by GC-MS. The major diastereomer was isolated and characterized (47% yield). The *trans*-configuration

was determined based on the  ${}^3J_{\text{ax,ax}}$  couplings between  $H_{\text{ax}}\text{C1}$  &  $H_{\text{ax}}\text{C2}$ , and  $H_{\text{ax}}\text{C4}$  &  $H_{\text{ax}}\text{C3}$ . The *trans*-configuration was confirmed by a crystal structure.

${}^1\text{H NMR}$  (300 MHz,  $\text{CDCl}_3$ )  $\delta$  4.37 (bs, 1H,  $H_{\text{N}}$ ), 3.59 (tt,  ${}^3J_{\text{ax,ax}} = 10.5$  Hz,  ${}^3J_{\text{ax,eq}} = 4.0$  Hz, 1H,  $H_{\text{ax}}\text{C1}$ ), 3.39 (tm,  ${}^3J_{\text{ax,ax}} = 11.6$  Hz, 1H,  $H_{\text{ax}}\text{C4}$ ), 2.12 – 1.88 (m, 4H,  $H_2\text{C2}$ ,  $H_2\text{C3}$ ), 1.63 (bs, 1H,  $H_{\text{O}}$ ), 1.43 (s, 9H,  $H_3\text{C7}$ ), 1.41 – 1.28 (m, 2H,  $H_2\text{C2}$ ), 1.26 – 1.05 (m, 2H,  $H_2\text{C3}$ );

${}^1\text{H NMR}$  (599 MHz,  $\text{CDCl}_3$ )  $\delta$  4.35 (bs, 1H,  $H_{\text{N}}$ ), 3.57 (tt,  ${}^3J_{\text{ax,ax}} = 10.6$  Hz,  ${}^3J_{\text{ax,eq}} = 4.2$  Hz, 1H,  $H_{\text{ax}}\text{C1}$ ), 3.40 (bs, 1H,  $H_{\text{ax}}\text{C4}$ ), 2.04 – 1.91 (m, 4H,  $H_2\text{C2}$ ,  $H_{\text{eq}}\text{C3}$ ), 1.54 (s, 1H,  $H_{\text{O}}$ ), 1.42 (s, 9H,  $H_3\text{C7}$ ), 1.35 (dm,  ${}^2J_{\text{HH}} = 13.2$  Hz, 2H,  $H_2\text{C2}$ ), 1.14 (ddm,  ${}^2J_{\text{HH}} = 12.5$  Hz,  ${}^3J_{\text{ax,ax}} = 11.1$  Hz, 2H,  $H_{\text{ax}}\text{C3}$ );

${}^{13}\text{C NMR}$  (151 MHz,  $\text{CDCl}_3$ )  $\delta$  155.4 (C5), 79.4 (C6), 69.9 (C1), 49.0 (C4), 34.1 (C2), 31.3 (C3), 28.5 (C7);

**ESI-MS** calculated  $[\text{C}_{11}\text{H}_{21}\text{NO}_3+\text{Na}]^+$ : 238.1414, found: 238.1429;

**IR**  $\tilde{\nu} = 3342, 2935, 2856, 1680, 1653, 1559, 1533, 1363, 1314, 1230, 1171, 1069, 951, 891$ ;

Analytical data are in good accordance with those previously reported for this compound.<sup>2</sup>

**GC-MS** (prior to purification):

Pd-catalyzed (*trans*)

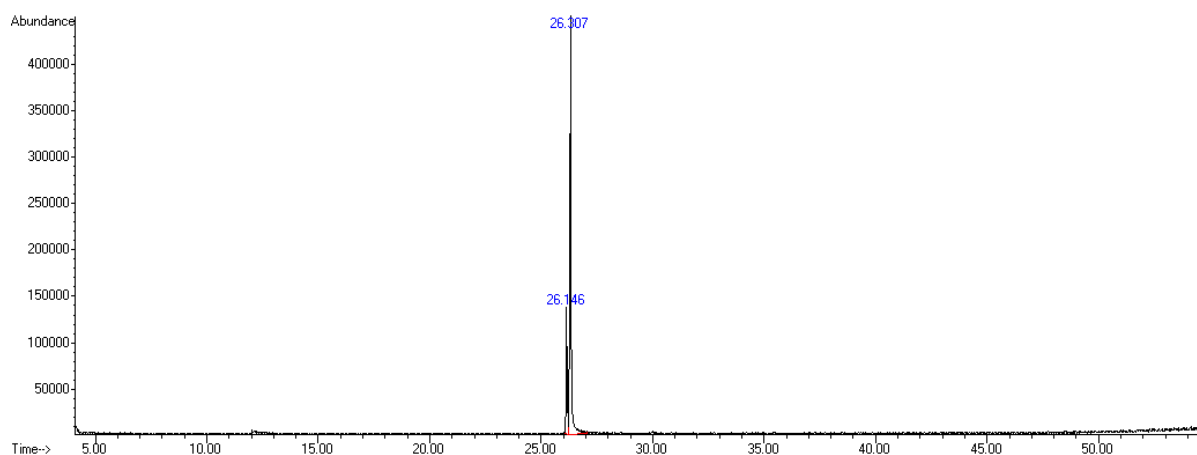

| peak # | R.T. min | first scan | max scan | last scan | PK TY | peak height | corr. area | corr. % max. | % of total |
|--------|----------|------------|----------|-----------|-------|-------------|------------|--------------|------------|
| 1      | 26.146   | 3753       | 3764     | 3777      | M2    | 136145      | 3885491    | 24.46%       | 19.655%    |
| 2      | 26.307   | 3778       | 3791     | 3919      | M     | 455635      | 15882568   | 100.00%      | 80.345%    |

Rh-catalyzed (*cis*)

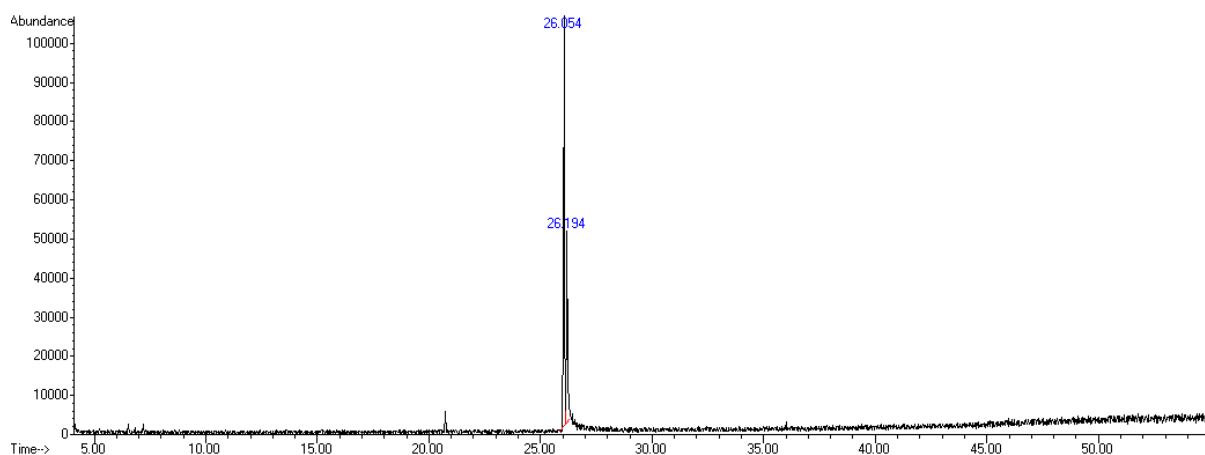

| peak # | R.T. min | first scan | max scan | last scan | PK TY | peak height | corr. area | corr. % max. | % of total |
|--------|----------|------------|----------|-----------|-------|-------------|------------|--------------|------------|
| 1      | 26.054   | 3713       | 3748     | 3762      | BU    | 103342      | 2837564    | 100.00%      | 62.600%    |
| 2      | 26.194   | 3762       | 3772     | 3799      | UU 3  | 48674       | 1695297    | 59.74%       | 37.400%    |

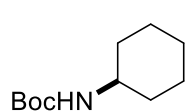

**2f**, white solid, procedure **A**: starting from 4-aminophenol, 4 mol% catalyst loading, 10 bar H<sub>2</sub>, solvent: *iso*-propanol (0.2 M, 2.0 mL), additive: K<sub>2</sub>CO<sub>3</sub> (0.2 equiv.) Addition of K<sub>2</sub>CO<sub>3</sub> increased the reactivity.

Boc-protection prior to isolation by addition of NEt<sub>3</sub> (3.0 equiv.) and Boc<sub>2</sub>O (3.0 equiv.). Purification with 40% to 50% EtOAc in pentane. 78% total yield, 88:12 d.r. determined by GC-MS. The major diastereomer was isolated and characterized (54% yield).

Analytical data are in accordance with compound **2f**.

**GC-MS** (prior to purification):

Pd-catalyzed (*trans*)

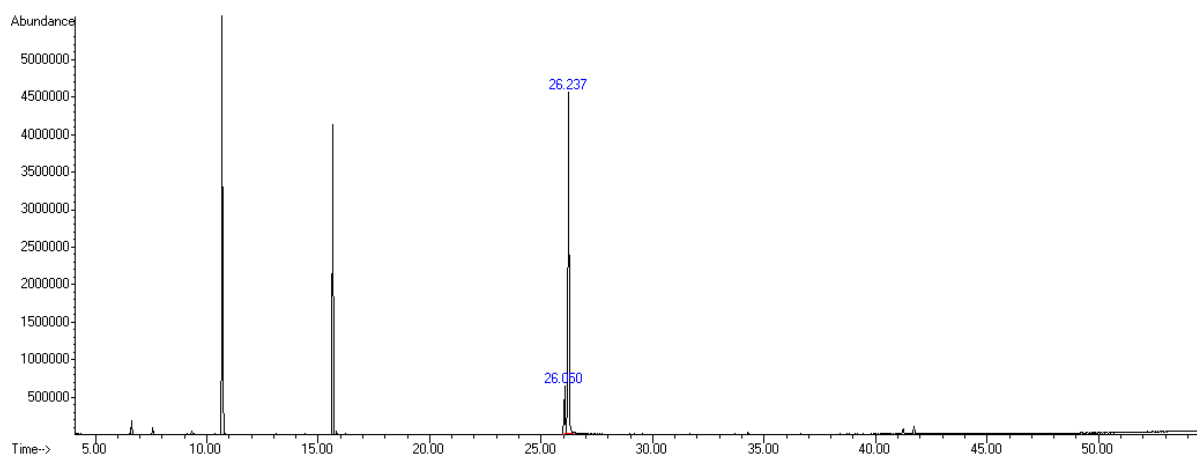

| peak # | R.T. min | first scan | max scan | last scan | PK TY | peak height | corr. area | corr. % max. | % of total |
|--------|----------|------------|----------|-----------|-------|-------------|------------|--------------|------------|
| 1      | 26.050   | 3736       | 3748     | 3761      | UU 2  | 633849      | 19502582   | 13.43%       | 11.839%    |
| 2      | 26.237   | 3761       | 3779     | 3823      | UB    | 4478967     | 145231780  | 100.00%      | 88.161%    |

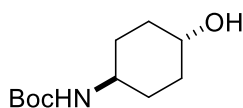

**2f**, white solid, procedure **A**: starting from 4-nitrophenol, 4 mol% catalyst loading, 10 bar H<sub>2</sub>, solvent: *iso*-propanol (0.2 M, 2.0 mL), additive: K<sub>2</sub>CO<sub>3</sub> (0.2 equiv.) Addition of K<sub>2</sub>CO<sub>3</sub> increased the reactivity. Boc-protection prior to isolation by addition of NEt<sub>3</sub> (3.0 equiv.) and Boc<sub>2</sub>O (3.0 equiv.). Purification with 40% to 50% EtOAc in pentane. 80% total yield, 89:11 d.r. determined by GC-MS. The major diastereomer was isolated and characterized (51% yield).

Analytical data are in accordance with compound **2f**.

**GC-MS** (prior to purification):

Pd-catalyzed (*trans*)

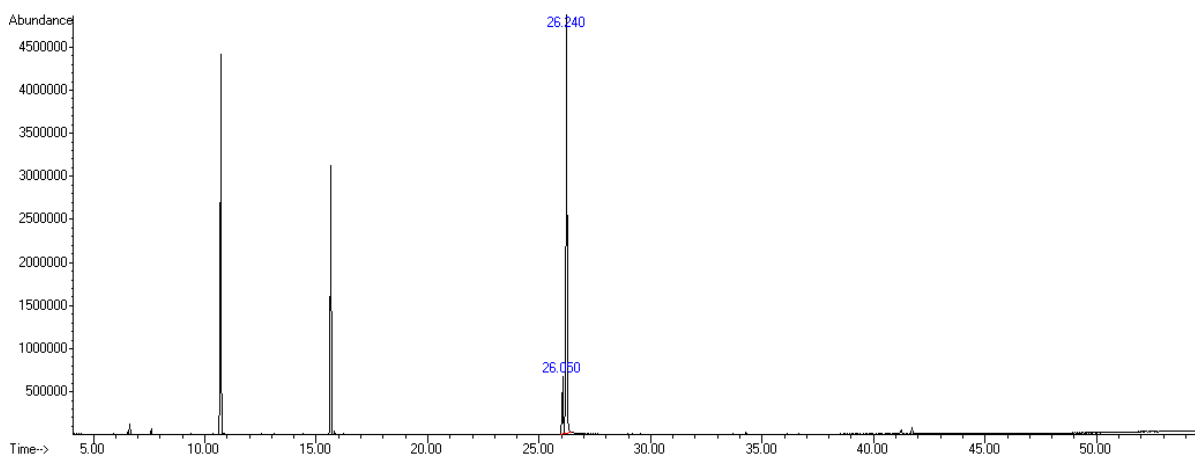

| peak # | R.T. min | first scan | max scan | last scan | PK TY | peak height | corr. area | corr. % max. | % of total |
|--------|----------|------------|----------|-----------|-------|-------------|------------|--------------|------------|
| 1      | 26.050   | 3734       | 3748     | 3761      | BU    | 662545      | 19948342   | 12.99%       | 11.497%    |
| 2      | 26.240   | 3761       | 3780     | 3822      | UU    | 4850292     | 153553588  | 100.00%      | 88.503%    |

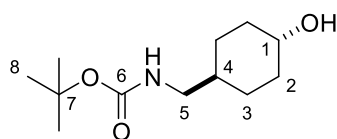

$${}^3J_{ax,ax} = 11.6 \text{ Hz}$$

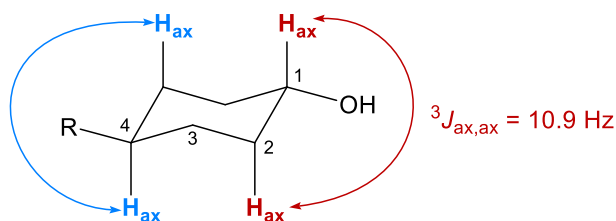

**2g**, off-white solid, procedure **A**: 4 mol% catalyst loading, 10 bar H<sub>2</sub>, solvent: *n*-heptane (0.4 M, 1.0 mL), 48 h. Purification with 40% to 50% EtOAc in pentane. 93% total yield, 77:23 d.r. determined by GC-MS. The major diastereomer was isolated and characterized (43% yield). The *trans*-configuration was determined based on the <sup>3</sup>J<sub>ax,ax</sub> couplings between H<sub>ax</sub>C1 & H<sub>ax</sub>C2, and H<sub>ax</sub>C4 & H<sub>ax</sub>C3. Determination of <sup>3</sup>J<sub>ax,ax</sub> coupling between H<sub>ax</sub>C4 & H<sub>ax</sub>C3 and J couplings assigned to H<sub>ax</sub>C2 and H<sub>ax</sub>C3 were possible with homonuclear decoupling experiments by irradiation at H<sub>2</sub>C5.

**<sup>1</sup>H NMR** (599 MHz, CDCl<sub>3</sub>) δ 4.58 (bs, 1H, *HN*), 3.54 (tt, <sup>3</sup>J<sub>ax,ax</sub> = 10.9 Hz, <sup>3</sup>J<sub>ax,eq</sub> = 4.3 Hz, 1H, *H<sub>ax</sub>C1*), 2.96 (t, <sup>3</sup>J<sub>HH</sub> = 6.5 Hz, 2H, *H<sub>2</sub>C5*), 2.02 – 1.91 (m, 2H, *H<sub>eq</sub>C2*), 1.77 (ddm, <sup>2</sup>J<sub>HH</sub> = 13.4 Hz, <sup>3</sup>J<sub>eq,ax</sub> = 4.3 Hz, 2H, *H<sub>eq</sub>C3*), 1.54 (bs, 1H, *HO*), 1.43 (s, 9H, *H<sub>3</sub>C8*), 1.41 – 1.33 (tm, <sup>3</sup>J<sub>ax,ax</sub> = 11.6 Hz, 1H, *H<sub>ax</sub>C4*), 1.24 (tdd, <sup>2</sup>J<sub>HH</sub> = 12.5 Hz, <sup>3</sup>J<sub>ax,ax</sub> = 10.8 Hz, <sup>3</sup>J<sub>ax,eq</sub> = 3.5 Hz, 2H, *H<sub>ax</sub>C2*), 1.03 – 0.93 (tdd, <sup>2</sup>J<sub>HH</sub> = 13.7 Hz, <sup>3</sup>J<sub>ax,ax</sub> = 11.5 Hz, <sup>3</sup>J<sub>ax,eq</sub> = 3.4 Hz, 2H, *H<sub>ax</sub>C3*);

**<sup>13</sup>C NMR** (151 MHz, CDCl<sub>3</sub>) δ 155.0 (C6), 78.9 (C7), 70.2 (C1), 47.8 (C5), 37.6 (C4), 33.9 (C2), 29.4 (C3), 28.0 (C8);

**ESI-MS** calculated [C<sub>12</sub>H<sub>23</sub>NO<sub>3</sub>+Na]<sup>+</sup>: 252.1570, found: 252.1574;

**IR**  $\tilde{\nu}$  = 3335, 2978, 2928, 2857, 1686, 1522, 1452, 1366, 1273, 1248, 1169, 1045, 1013, 731;

**GC-MS** (prior to purification):

Pd-catalyzed (*trans*)

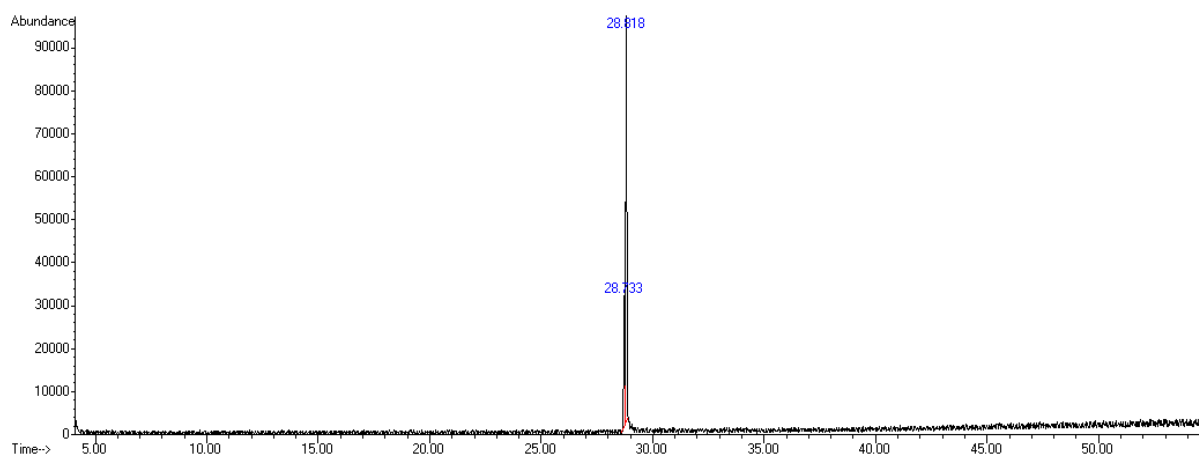

| peak # | R.T. min | first scan | max scan | last scan | PK TY | peak height | corr. area | corr. % max. | % of total |
|--------|----------|------------|----------|-----------|-------|-------------|------------|--------------|------------|
| 1      | 28.733   | 4186       | 4205     | 4211      | BU 2  | 29907       | 801701     | 30.15%       | 23.163%    |
| 2      | 28.818   | 4211       | 4220     | 4232      | UU 3  | 94623       | 2659371    | 100.00%      | 76.837%    |

Rh-catalyzed (*cis*)

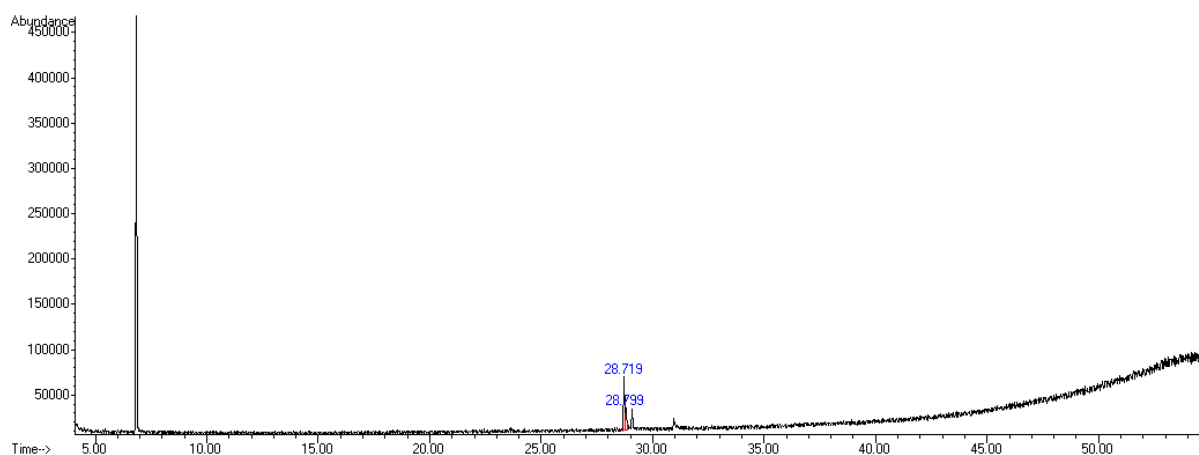

| peak # | R.T. min | first scan | max scan | last scan | PK TY | peak height | corr. area | corr. % max. | % of total |
|--------|----------|------------|----------|-----------|-------|-------------|------------|--------------|------------|
| 1      | 28.719   | 4192       | 4203     | 4212      | M3    | 59367       | 1825977    | 100.00%      | 69.781%    |
| 2      | 28.799   | 4212       | 4217     | 4226      | M5    | 24465       | 790762     | 43.31%       | 30.219%    |

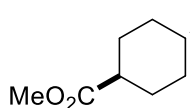

**2h**, colorless oil, 3 mol% catalyst loading, 5 bar H<sub>2</sub>, solvent: *n*-heptane (0.4 M, 1.0 mL). Purification with 30% EtOAc in pentane. 99% total yield, 56:44 d.r. determined by <sup>1</sup>H NMR. The major diastereomer was isolated and characterized (38% yield). The hydroxy group occupies the equatorial position based on the <sup>3</sup>J<sub>ax,ax</sub> coupling between H<sub>ax</sub>C1 & H<sub>ax</sub>C2.

<sup>1</sup>H NMR (300 MHz, CDCl<sub>3</sub>) δ 3.65 (s, 3H), 3.63 – 3.52 (m, 1H), 2.24 (tt, <sup>3</sup>J<sub>ax,ax</sub> = 11.9 Hz, <sup>3</sup>J<sub>ax,eq</sub> = 3.5 Hz, 1H, H<sub>ax</sub>C1), 2.07 – 1.93 (m, 4H), 1.81 (s, 1H), 1.57 – 1.39 (m, 2H), 1.36 – 1.16 (m, 2H);

<sup>13</sup>C NMR (75 MHz, CDCl<sub>3</sub>) δ 176.2, 69.9, 51.8, 42.2, 34.6, 27.3;

ESI-MS calculated [C<sub>8</sub>H<sub>14</sub>O<sub>3</sub>+Na]<sup>+</sup>: 181.0835, found: 181.0842;

IR  $\tilde{\nu}$  = 3366, 2935, 1734, 1718, 1457, 1436, 1236, 1198, 1170, 1137, 1067, 1033, 961, 894;

Analytical data are in good accordance with those previously reported for this compound.<sup>3</sup>

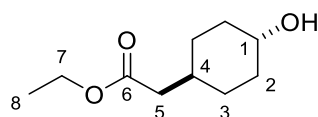

$${}^3J_{ax,ax} = 11.5 \text{ Hz}$$

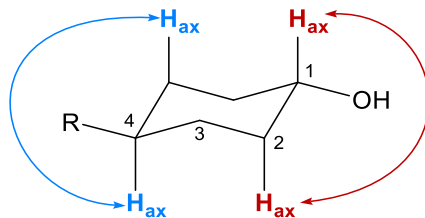

$${}^3J_{ax,ax} = 10.9 \text{ Hz}$$

**2i**, colorless oil, 2 mol% catalyst loading, 5 bar H<sub>2</sub>, solvent: *n*-heptane (0.4 M, 1.0 mL). Purification with 20% to 30% EtOAc in pentane. 89% total yield, 76:24 d.r. determined by <sup>1</sup>H NMR. The major diastereomer was isolated and characterized (67% yield). The *trans*-configuration was determined based on the <sup>3</sup>J<sub>ax,ax</sub> couplings between H<sub>ax</sub>C1 & H<sub>ax</sub>C2, and H<sub>ax</sub>C4 & H<sub>ax</sub>C3. Determination of <sup>3</sup>J<sub>ax,ax</sub> coupling between H<sub>ax</sub>C4 & H<sub>ax</sub>C3 and was possible with homonuclear decoupling experiments by irradiation at H<sub>2</sub>C5.

<sup>1</sup>H NMR (599 MHz, CDCl<sub>3</sub>) δ 4.08 (q, <sup>3</sup>J<sub>HH</sub> = 7.2 Hz, 2H, H<sub>2</sub>C7), 3.60 – 3.46 (tm, <sup>3</sup>J<sub>ax,ax</sub> = 10.9 Hz, 1H, H<sub>ax</sub>C1), 2.14 (d, <sup>3</sup>J<sub>HH</sub> = 7.0, 2H, H<sub>2</sub>C5), 2.04 (bs, 1H, HO), 2.01 – 1.89 (m, 2H, H<sub>2</sub>C2), 1.80 – 1.71 (m, 2H, H<sub>2</sub>C3), 1.73 – 1.65 (tm, <sup>3</sup>J<sub>ax,ax</sub> = 11.5 Hz, 1H, H<sub>ax</sub>C4), 1.29 – 1.23 (m, 2H, H<sub>2</sub>C2), 1.21 (t, <sup>3</sup>J<sub>HH</sub> = 7.1 Hz, 3H, H<sub>3</sub>C8), 1.06 – 0.95 (m, 2H, H<sub>2</sub>C3);

<sup>13</sup>C NMR (151 MHz, CDCl<sub>3</sub>) δ 173.0 (C6), 71.4 (C1), 59.5 (C7), 41.4 (C5), 35.2 (C2), 34.0 (C4), 31.0 (C3), 13.9 (C8);

ESI-MS calculated [C<sub>10</sub>H<sub>18</sub>O<sub>3</sub>+Na]<sup>+</sup>: 209.1148, found: 209.1161;



IR  $\tilde{\nu}$  = 3361, 2926, 1734, 1717, 1457, 1370, 1285, 1221, 1156, 1107, 1030, 971, 932;

Analytical data are in good accordance with those previously reported for this compound.<sup>4</sup>

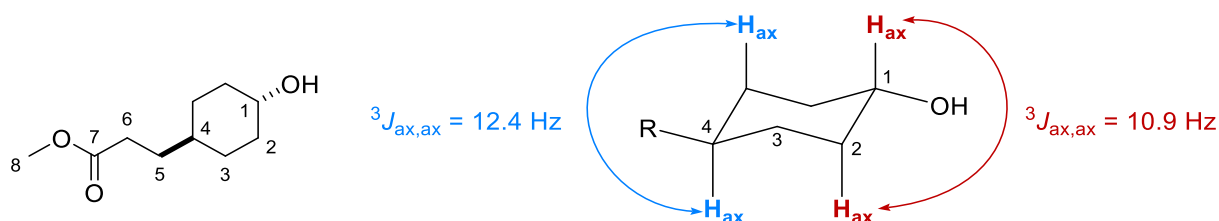

**2j**, colorless oil, 3 mol% catalyst loading, 10 bar  $\text{H}_2$ , solvent: *n*-heptane (0.4 M, 1.0 mL). Purification with 20% to 30% EtOAc in pentane. 91% total yield, 78:22 d.r. determined by  ${}^1\text{H NMR}$ . The major diastereomer was isolated and characterized (68% yield). The *trans*-configuration was determined based on the  ${}^3J_{\text{ax,ax}}$  couplings between  $H_{\text{ax}}\text{C1}$  &  $H_{\text{ax}}\text{C2}$ , and  $H_{\text{ax}}\text{C4}$  &  $H_{\text{ax}}\text{C3}$ . Determination of  ${}^3J_{\text{ax,ax}}$  coupling between  $H_{\text{ax}}\text{C4}$  &  $H_{\text{ax}}\text{C3}$  and was possible with homonuclear decoupling experiments by irradiation at  $H_2\text{C5}$ .

${}^1\text{H NMR}$  (599 MHz,  $\text{CDCl}_3$ )  $\delta$  3.64 (s, 3H,  $H_3\text{C8}$ ), 3.51 (tt,  ${}^3J_{\text{ax,ax}} = 10.9 \text{ Hz}$ ,  ${}^3J_{\text{ax,eq}} = 4.3 \text{ Hz}$ , 1H,  $H_{\text{ax}}\text{C1}$ ), 2.32 – 2.26 (m, 2H,  $H_2\text{C6}$ ), 1.98 – 1.90 (m, 2H,  $H_2\text{C2}$ ), 1.78 (bs, 1H, HO), 1.77 – 1.71 (m, 2H,  $H_2\text{C3}$ ), 1.51 (dt,  ${}^3J_{\text{HH}} = 8.2, 7.0 \text{ Hz}$ , 2H,  $H_2\text{C5}$ ), 1.21 (m, 2H,  $H_2\text{C2}$ ), 1.18 (tm,  ${}^3J_{\text{ax,ax}} = 12.4 \text{ Hz}$ , 1H,  $H_{\text{ax}}\text{C4}$ ), 0.99 – 0.89 (m, 2H,  $H_2\text{C3}$ );

${}^{13}\text{C NMR}$  (151 MHz,  $\text{CDCl}_3$ )  $\delta$  174.5 (C7), 71.0 (C1), 51.6 (C8), 36.3 (C4), 35.4 (C2), 32.0 (C6), 31.6 (C5), 31.0 (C3);

ESI-MS calculated  $[\text{C}_{10}\text{H}_{18}\text{O}_3+\text{Na}]^+$ : 209.1148, found: 209.1162;

IR  $\tilde{\nu}$  = 3383, 2928, 2857, 1728, 1452, 1437, 1265, 1169, 1047, 1015, 909, 729, 646.

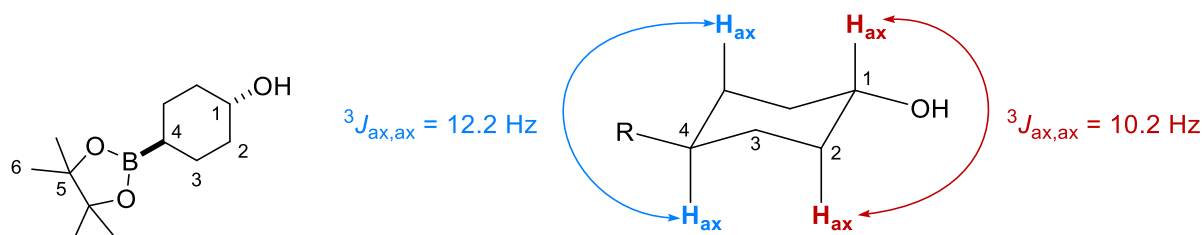

**2k**, white solid, 3 mol% catalyst loading, 10 bar  $\text{H}_2$ , solvent: *n*-heptane (0.4 M, 1.0 mL). Purification with 10% EtOAc in  $\text{CH}_2\text{Cl}_2$ . 65% total yield, 78:22 d.r. determined by GC-MS. The major diastereomer was isolated and characterized (33% yield). The *trans*-configuration was determined based on the  ${}^3J_{\text{ax,ax}}$  couplings between  $H_{\text{ax}}\text{C1}$  &  $H_{\text{ax}}\text{C2}$ , and  $H_{\text{ax}}\text{C4}$  &  $H_{\text{ax}}\text{C3}$ .

${}^1\text{H NMR}$  (599 MHz,  $\text{CDCl}_3$ )  $\delta$  3.53 (tt,  ${}^3J_{\text{ax,ax}} = 10.2 \text{ Hz}$ ,  ${}^3J_{\text{ax,eq}} = 4.2 \text{ Hz}$ , 1H,  $H_{\text{ax}}\text{C1}$ ), 2.00 – 1.93 (m, 2H,  $H_2\text{C2}$ ), 1.85 – 1.78 (m, 2H,  $H_2\text{C3}$ ), 1.49 (bs, 1H, HO), 1.31 – 1.14 (m, 4H,  $H_2\text{C2}$ ,  $H_2\text{C3}$ ), 1.21 (s, 12H,  $H_3\text{C6}$ ), 0.79 (tt,  ${}^3J_{\text{ax,ax}} = 12.2 \text{ Hz}$ ,  ${}^3J_{\text{ax,eq}} = 3.5 \text{ Hz}$ , 1H,  $H_{\text{ax}}\text{C4}$ );

$^{13}\text{C}$  NMR (151 MHz,  $\text{CDCl}_3$ )  $\delta$  83.1 (C5), 70.9 (C1), 36.2 (C2), 26.9 (C3), 24.4 (C6);

$^{11}\text{B}$  NMR (128 MHz,  $\text{CDCl}_3$ )  $\delta$  34.4 (bs);

ESI-MS calculated  $[\text{C}_{12}\text{H}_{23}\text{BO}_3+\text{Na}]^+$ : 249.1632, found: 249.1640;

IR  $\tilde{\nu}$  = 3306, 2976, 2926, 2852, 1381, 1363, 1319, 1146, 1092, 1059, 961, 862, 848;

GC-MS (prior to purification):

Pd-catalyzed (*trans*)

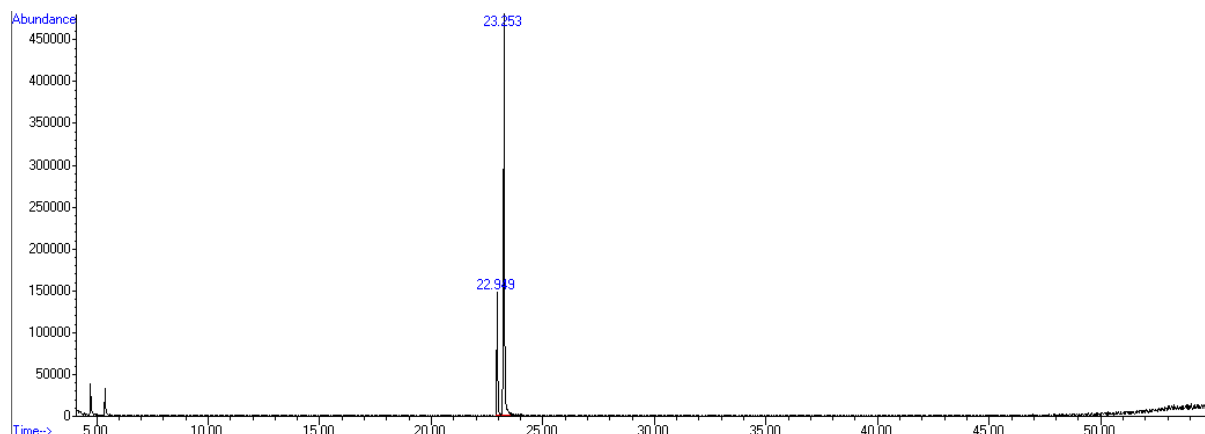

| peak # | R.T. min | first scan | max scan | last scan | PK TY | peak height | corr. area | corr. % max. | % of total |
|--------|----------|------------|----------|-----------|-------|-------------|------------|--------------|------------|
| 1      | 22.949   | 3210       | 3218     | 3235      | M2    | 148996      | 3608228    | 27.76%       | 21.725%    |
| 2      | 23.253   | 3258       | 3270     | 3322      | M2    | 483486      | 13000058   | 100.00%      | 78.275%    |

Rh-catalyzed (*cis*)

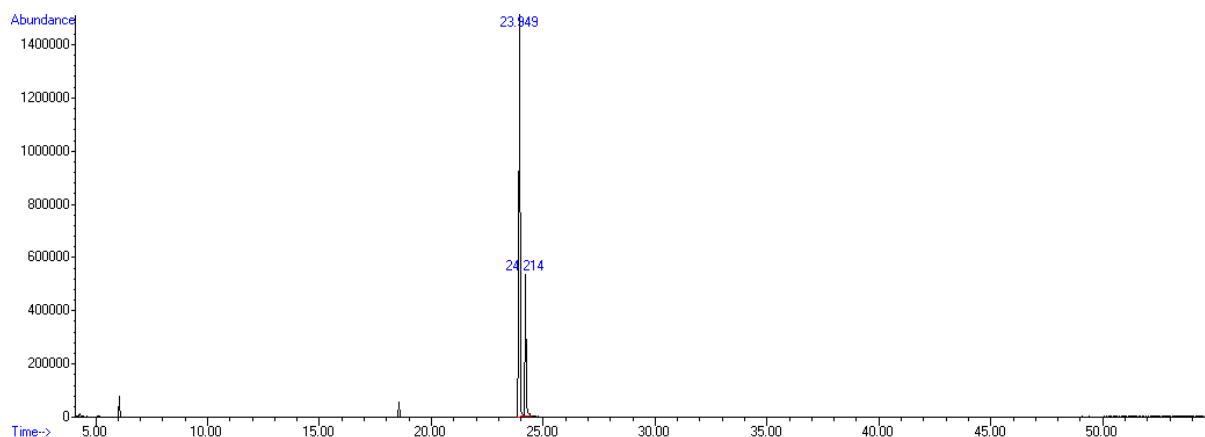

| peak # | R.T. min | first scan | max scan | last scan | PK TY | peak height | corr. area | corr. % max. | % of total |
|--------|----------|------------|----------|-----------|-------|-------------|------------|--------------|------------|
| 1      | 23.949   | 3371       | 3389     | 3420      | M2    | 1511071     | 48586427   | 100.00%      | 76.595%    |
| 2      | 24.214   | 3422       | 3434     | 3473      | M2    | 536769      | 14846548   | 30.56%       | 23.405%    |

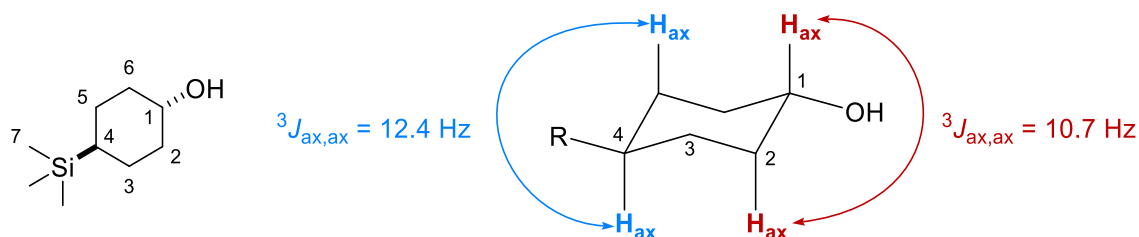

**21**, white solid, 2 mol% catalyst loading, 5 bar  $H_2$ , solvent: *n*-heptane (0.4 M, 1.0 mL). Purification with 15% EtOAc in pentane. 86% total yield, 85:15 d.r. determined by GC-MS. The major diastereomer was isolated and characterized (65% yield). The *trans*-configuration was determined based on the  ${}^3J_{ax,ax}$  couplings between  $H_{ax}C1$  &  $H_{ax}C2$ , and  $H_{ax}C4$  &  $H_{ax}C3$ .

${}^1H$  NMR (599 MHz,  $CDCl_3$ )  $\delta$  3.50 (tt,  ${}^3J_{ax,ax} = 10.7 \text{ Hz}$ ,  ${}^3J_{ax,eq} = 4.3 \text{ Hz}$ , 1H,  $H_{ax}C1$ ), 2.06 – 1.99 (m, 2H,  $H_2C2$ ), 1.79 – 1.72 (m, 2H,  $H_2C3$ ), 1.43 (bs, 1H,  $HO$ ), 1.22 – 1.06 (m, 4H,  $H_2C2$ ,  $H_2C3$ ), 0.44 – 0.38 (tm,  ${}^3J_{ax,ax} = 12.4 \text{ Hz}$ , 1H,  $H_{ax}C4$ ), –0.06 (s, 9H,  $H_3C5$ );

${}^{13}C$  NMR (151 MHz,  $CDCl_3$ )  $\delta$  71.4 (C1), 38.0 (C2), 26.6 (C3), 24.2 (C4), –3.3 (C5);

${}^{29}Si$  NMR (119 MHz,  $CDCl_3$ )  $\delta$  2.9;

ESI-MS calculated  $[C_9H_{20}OSi+Na]^+$ : 195.1176, found: 195.1184;

IR  $\tilde{\nu}$  = 3271, 2924, 2847, 1445, 1248, 1053, 966, 891, 854, 831, 734, 702, 689;

GC-MS (prior to purification):

Pd-catalyzed (*trans*)

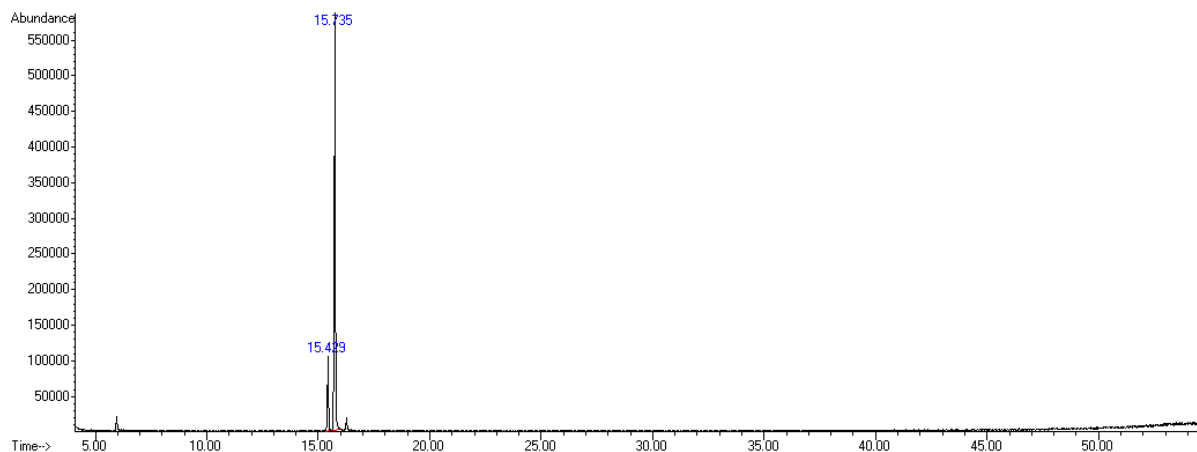

| peak # | R.T. min | first scan | max scan | last scan | PK TY | peak height | corr. area | corr. % max. | % of total |
|--------|----------|------------|----------|-----------|-------|-------------|------------|--------------|------------|
| 1      | 15.429   | 1919       | 1935     | 1956      | BB 4  | 102553      | 2798938    | 17.62%       | 14.982%    |
| 2      | 15.735   | 1971       | 1988     | 2037      | BB    | 580288      | 15882491   | 100.00%      | 85.018%    |

Rh-catalyzed (*cis*)

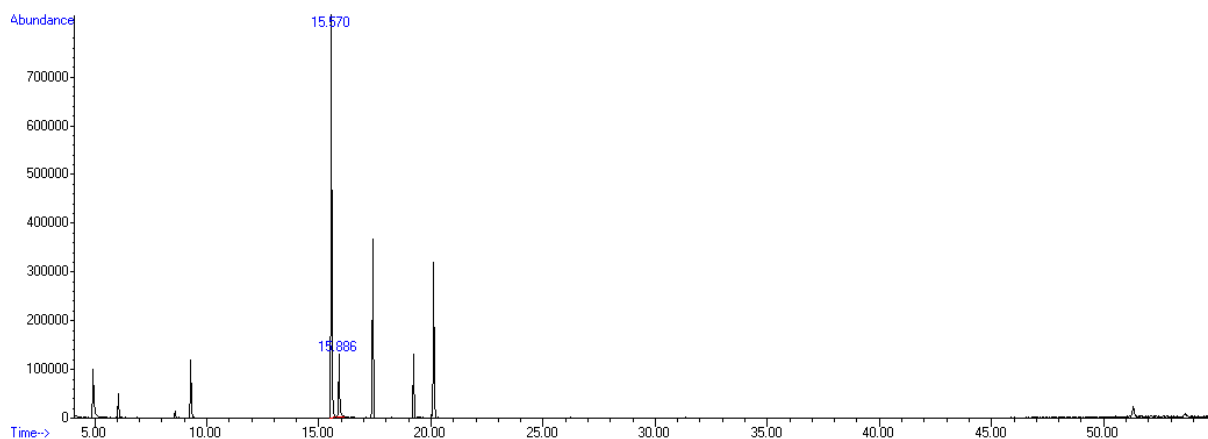

| peak # | R.T. min | first scan | max scan | last scan | PK TY | peak height | corr. area | corr. % max. | % of total |
|--------|----------|------------|----------|-----------|-------|-------------|------------|--------------|------------|
| 1      | 15.570   | 1948       | 1959     | 1992      | M     | 832402      | 20639012   | 100.00%      | 82.408%    |
| 2      | 15.886   | 2003       | 2013     | 2059      | M2    | 129488      | 4406029    | 21.35%       | 17.592%    |

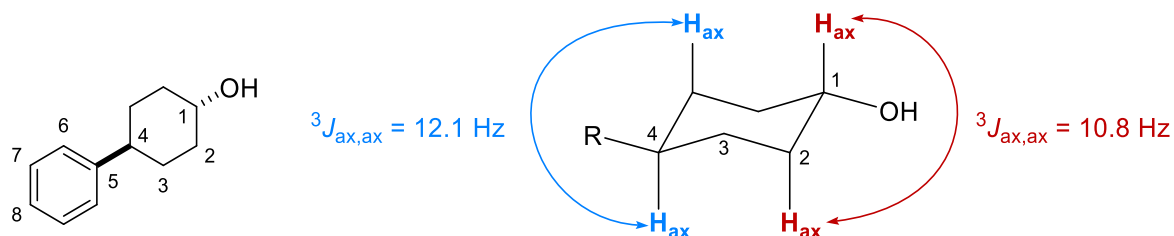

**2m**, white solid, procedure **A**: 4 mol% catalyst loading, 10 bar H<sub>2</sub>, solvent: *iso*-propanol (0.2 M, 2.0 mL), additive: K<sub>2</sub>CO<sub>3</sub> (0.1 equiv.). Addition of K<sub>2</sub>CO<sub>3</sub> increased the reactivity and selectivity. Purification with 10% to 20% EtOAc in pentane. 76% total yield, 90:10 d.r. determined by <sup>1</sup>H NMR. The major diastereomer was isolated and characterized (44% yield). The *trans*-configuration was determined based on the <sup>3</sup>J<sub>ax,ax</sub> couplings between H<sub>ax</sub>C1 & H<sub>ax</sub>C2, and H<sub>ax</sub>C4 & H<sub>ax</sub>C3. The *trans*-configuration was confirmed by a crystal structure.

<sup>1</sup>H NMR (599 MHz, CDCl<sub>3</sub>) δ 7.32 – 7.28 (m, 2H, H<sub>Ar</sub>), 7.22 – 7.18 (m, 3H, H<sub>Ar</sub>), 3.69 (tt, <sup>3</sup>J<sub>ax,ax</sub> = 10.8 Hz, <sup>3</sup>J<sub>ax,eq</sub> = 4.4 Hz, 1H, H<sub>ax</sub>C1), 2.50 (tt, <sup>3</sup>J<sub>ax,ax</sub> = 12.1, <sup>3</sup>J<sub>ax,eq</sub> = 3.5 Hz, 1H, H<sub>ax</sub>C4), 2.15 – 2.05 (m, 2H, H<sub>2</sub>C2), 1.98 – 1.91 (m, 2H, H<sub>eq</sub>C3), 1.60 (bs, 1H, HO), 1.55 (dddd, <sup>2</sup>J<sub>HH</sub> = 13.2 Hz, <sup>3</sup>J<sub>ax,ax</sub> = 11.9 Hz, <sup>3</sup>J<sub>ax,eq</sub> = 3.1 Hz, <sup>3</sup>J<sub>ax,eq</sub> = 3.1 Hz, 2H, H<sub>ax</sub>C3), 1.49 – 1.39 (m, 2H, H<sub>2</sub>C2);

<sup>13</sup>C NMR (151 MHz, CDCl<sub>3</sub>) δ 146.7 (C5), 128.5 (C<sub>Ar</sub>), 126.9 (C<sub>Ar</sub>), 126.2 (C<sub>Ar</sub>), 70.8 (C1), 43.6 (C4), 36.1 (C2), 32.6 (C3).

**ESI-MS** calculated [C<sub>12</sub>H<sub>16</sub>O+Na]<sup>+</sup>: 199.1093, found: 199.1103.

Analytical data are in good accordance with those previously reported for this compound.<sup>5</sup>

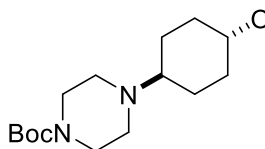

**2n**, off-white solid, procedure **A**: 4 mol% catalyst loading, 10 bar H<sub>2</sub>, solvent: *iso*-propanol (0.2 M, 2.0 mL), additive: K<sub>2</sub>CO<sub>3</sub> (0.2 equiv.).

Addition of K<sub>2</sub>CO<sub>3</sub> increased the reactivity. Purification with 2% to 5% to 10% MeOH in CH<sub>2</sub>Cl<sub>2</sub>. 79% total yield, 87:13 d.r. determined by GC-MS. Both diastereomers were isolated and characterized together and the major signals are reported. The hydroxy group occupies the equatorial position based on the <sup>3</sup>J<sub>ax,ax</sub> coupling between H<sub>ax</sub>C1 & H<sub>ax</sub>C2.

<sup>1</sup>H NMR (400 MHz, CDCl<sub>3</sub>) δ 3.57 (dt, <sup>3</sup>J<sub>ax,ax</sub> = 9.7 Hz, <sup>3</sup>J<sub>ax,eq</sub> = 5.3 Hz, 1H, H<sub>ax</sub>C1), 3.50 – 3.35 (m, 4H), 2.63 – 2.41 (m, 4H), 2.30 (bs, 1H), 2.09 – 1.96 (m, 2H), 1.94 – 1.80 (m, 2H), 1.76 – 1.50 (m, 2H), 1.45 (s, 9H), 1.37 – 1.20 (m, 3H);

<sup>13</sup>C NMR (101 MHz, CDCl<sub>3</sub>) δ 154.6, 79.8, 70.6, 62.9, 49.2, 49.0, 34.7, 32.0, 28.6, 26.5;

ESI-MS calculated [C<sub>15</sub>H<sub>28</sub>N<sub>2</sub>O<sub>3</sub>+H]<sup>+</sup>: 285.2173, found: 285.2189;

IR  $\tilde{\nu}$  = 2930, 2853, 1686, 1404, 1252, 1175, 1119, 1074, 955, 868, 775;

GC-MS (prior to purification):

Pd-catalyzed (*trans*)

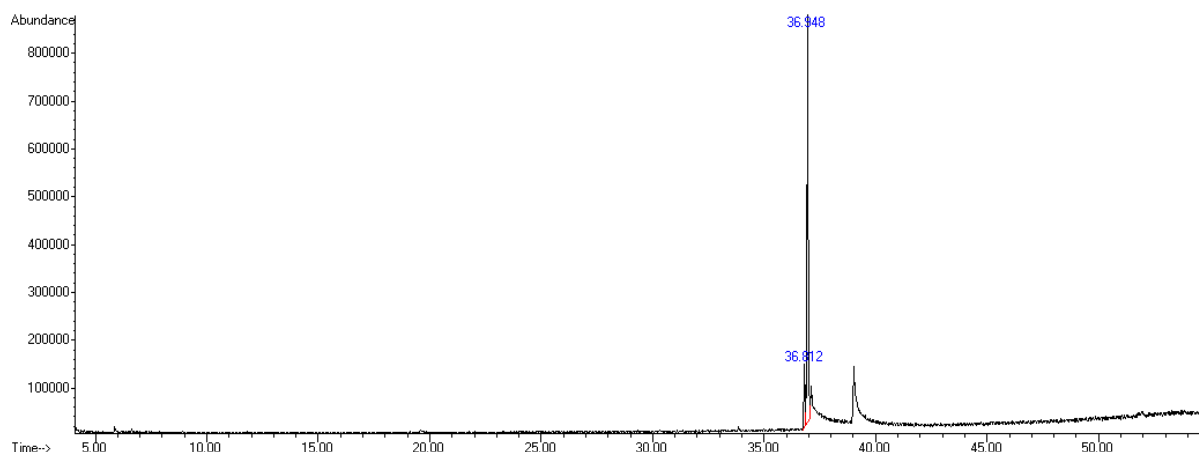

| peak # | R.T. min | first scan | max scan | last scan | PK TY | peak height | corr. area | corr. % max. | % of total |
|--------|----------|------------|----------|-----------|-------|-------------|------------|--------------|------------|
| 1      | 36.812   | 5572       | 5584     | 5594      | BU 2  | 131393      | 4540244    | 15.48%       | 13.402%    |
| 2      | 36.948   | 5594       | 5607     | 5628      | UU    | 854052      | 29338186   | 100.00%      | 86.598%    |

Rh-catalyzed (*cis*)

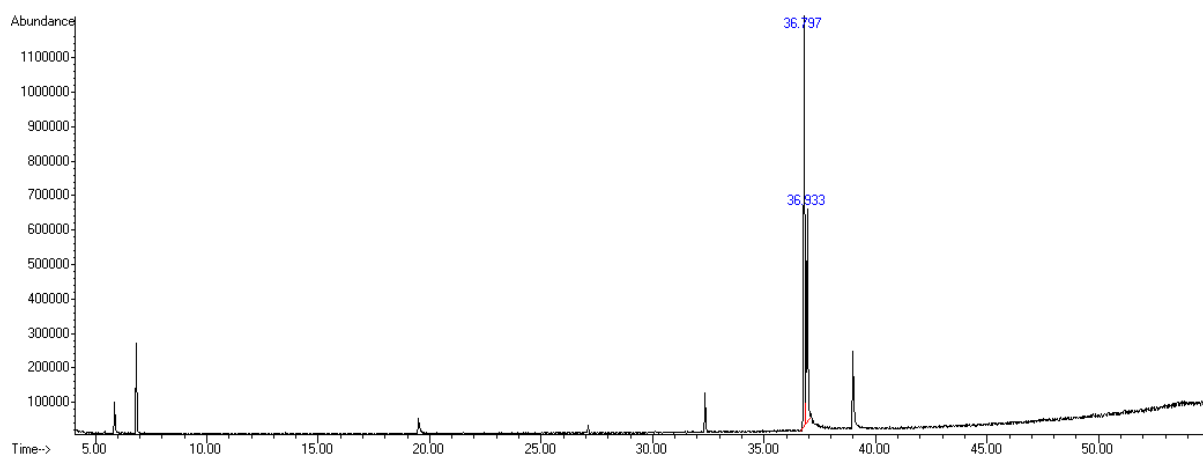

| peak # | R.T. min | first scan | max scan | last scan | PK TY | peak height | corr. area | corr. % max. | % of total |
|--------|----------|------------|----------|-----------|-------|-------------|------------|--------------|------------|
| 1      | 36.797   | 5558       | 5581     | 5594      | PV    | 1179685     | 37303856   | 100.00%      | 62.908%    |
| 2      | 36.933   | 5594       | 5605     | 5631      | UU    | 615909      | 21994866   | 58.96%       | 37.092%    |

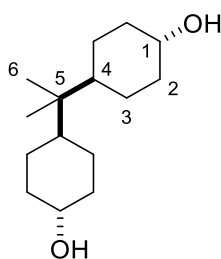

$${}^3J_{ax,ax} = 12.0 \text{ Hz}$$

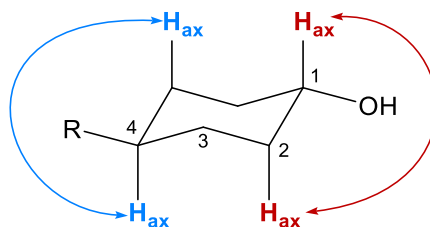

$${}^3J_{ax,ax} = 10.9 \text{ Hz}$$

**2o**, white solid, procedure A: 4 mol% catalyst loading, 10 bar H<sub>2</sub>, solvent: *iso*-propanol (0.2 M, 2.0 mL). Purification with 40% to 50% EtOAc in pentane. 87% total yield, 67:31:2 d.r. (*trans/trans:trans/cis:cis/cis*) determined by GC-MS. The major diastereomer was isolated and characterized (54% yield). The *trans*-configuration was determined based on the  ${}^3J_{ax,ax}$  couplings between H<sub>ax</sub>C1 & H<sub>ax</sub>C2, and H<sub>ax</sub>C4 & H<sub>ax</sub>C3. The multiplets of H<sub>ax</sub>C4 and H<sub>ax</sub>C2 are overlapping. The *trans*-configuration was confirmed by a crystal structure.

<sup>1</sup>H NMR (599 MHz, CDCl<sub>3</sub>) δ 3.52 (tt,  ${}^3J_{ax,ax} = 10.9 \text{ Hz}$ ,  ${}^3J_{ax,eq} = 4.4 \text{ Hz}$ , 2H, H<sub>ax</sub>C1), 2.06 – 1.98 (m, 4H, H<sub>2</sub>C2), 1.74 – 1.67 (m, 4H, H<sub>eq</sub>C3), 1.52 (bs, 2H, HO), 1.28 – 1.22 (tm,  ${}^3J_{ax,ax} = 12.0 \text{ Hz}$ , 2H, H<sub>ax</sub>C4), 1.24 – 1.16 (m, 4H, H<sub>2</sub>C2), 1.05 (dddd,  ${}^2J_{HH} = 13.1 \text{ Hz}$ ,  ${}^3J_{ax,ax} = 11.6 \text{ Hz}$ ,  ${}^3J_{ax,eq} = 3.1 \text{ Hz}$ ,  ${}^3J_{ax,eq} = 3.1 \text{ Hz}$ , 4H, H<sub>ax</sub>C3), 0.72 (s, 6H, H<sub>3</sub>C6);

<sup>13</sup>C NMR (151 MHz, CDCl<sub>3</sub>) δ 71.5 (C1), 43.3 (C4), 36.8 (C5), 36.4 (C2), 25.1 (C3), 20.8 (C6);

ESI-MS calculated [C<sub>15</sub>H<sub>28</sub>O<sub>2</sub>+Na]<sup>+</sup>: 263.1982, found: 263.1978;

IR  $\tilde{\nu}$  = 3342, 2982, 1734, 1373, 1238, 1045, 914, 731, 648, 633, 608.

GC-MS (prior to purification):

Pd-catalyzed (*trans*)

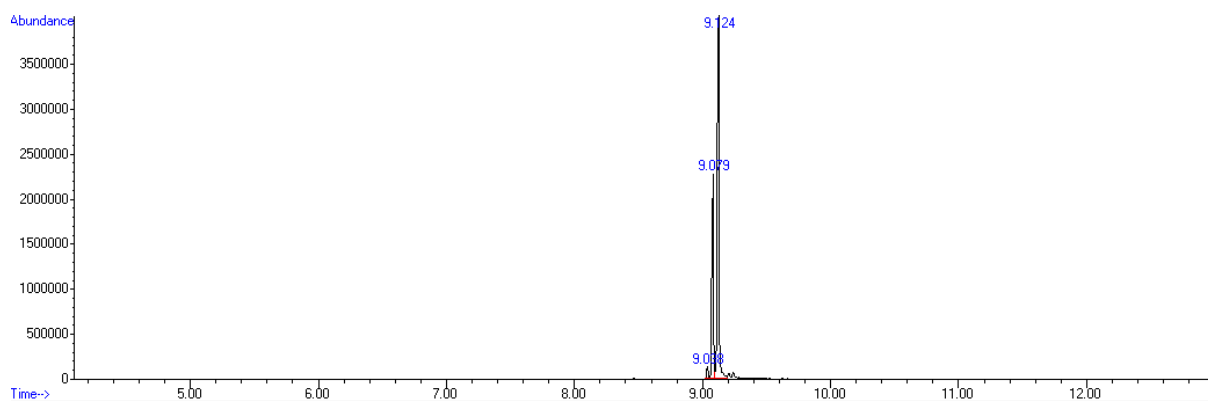

| peak # | R.T. min | first scan | max scan | last scan | PK TY | peak height | corr. area | corr. % max. | % of total |
|--------|----------|------------|----------|-----------|-------|-------------|------------|--------------|------------|
| 1      | 9.038    | 842        | 845      | 848       | M     | 126147      | 990231     | 2.47%        | 1.668%     |
| 2      | 9.079    | 848        | 852      | 855       | M     | 2333135     | 18331466   | 45.76%       | 30.870%    |
| 3      | 9.124    | 855        | 860      | 871       | M     | 4378875     | 40060255   | 100.00%      | 67.462%    |

Rh-catalyzed (*cis*)

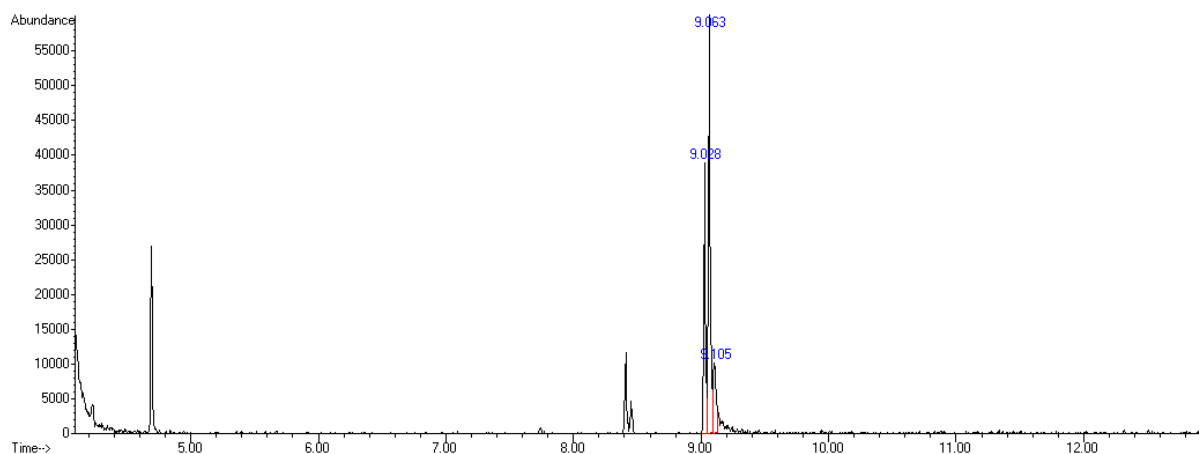

| peak # | R.T. min | first scan | max scan | last scan | PK TY | peak height | corr. area | corr. % max. | % of total     |
|--------|----------|------------|----------|-----------|-------|-------------|------------|--------------|----------------|
| 1      | 9.028    | 840        | 843      | 847       | M     | 39038       | 321015     | 53.82%       | 29.786% ketone |
| 2      | 9.063    | 847        | 849      | 854       | M     | 60445       | 596446     | 100.00%      | 55.343%        |
| 3      | 9.105    | 854        | 856      | 860       | M3    | 10218       | 160264     | 26.87%       | 14.871%        |

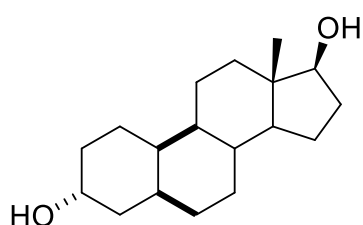

**2p**, white solid, procedure A: 4 mol% catalyst loading, 10 bar H<sub>2</sub>, solvent: *iso*-propanol (0.2 M, 2.0 mL). Purification with 40% to 50% EtOAc in pentane. 72% total yield, 90:10 d.r. determined by GC-MS. Both diastereomers were isolated and characterized together. The signals of the major diastereomer are reported.

<sup>1</sup>H NMR (400 MHz, CDCl<sub>3</sub>) δ 4.07 (m, 1H), 3.63 (m, 1H), 2.08 – 1.95 (m, 2H), 1.86 – 1.36 (m, 15H), 1.24 (m, 4H), 1.16 – 0.97 (m, 2H), 0.95 – 0.80 (m, 2H), 0.72 (s, 3H);

<sup>13</sup>C NMR (101 MHz, CDCl<sub>3</sub>) δ 82.1, 67.4, 51.1, 48.0, 43.6, 41.5, 38.7, 37.2, 37.0, 34.9, 33.7, 32.3, 30.7, 28.9, 25.9, 23.4, 15.8, 11.2;

ESI-MS calculated  $[C_{18}H_{30}O_2+Na]^+$ : 301.2138, found: 301.2149;

IR  $\tilde{\nu}$  = 3376, 2915, 2847, 1717, 1653, 1449, 1373, 1265, 1063, 1051, 1026, 955, 582;

GC-MS (prior to purification):

Pd-catalyzed (*trans*)

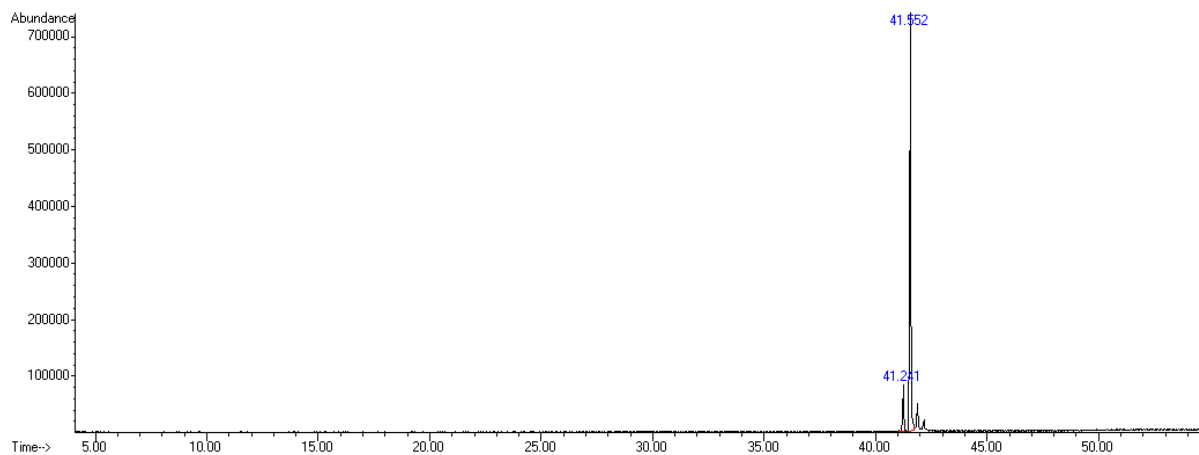

| peak # | R.T. min | first scan | max scan | last scan | PK TY | peak height | corr. area | corr. % max. | % of total |
|--------|----------|------------|----------|-----------|-------|-------------|------------|--------------|------------|
| 1      | 41.241   | 6305       | 6340     | 6359      | BU 7  | 82382       | 2701245    | 11.38%       | 10.214%    |
| 2      | 41.552   | 6376       | 6393     | 6421      | BU 2  | 735745      | 23744400   | 100.00%      | 89.786%    |

Rh-catalyzed (*cis*)

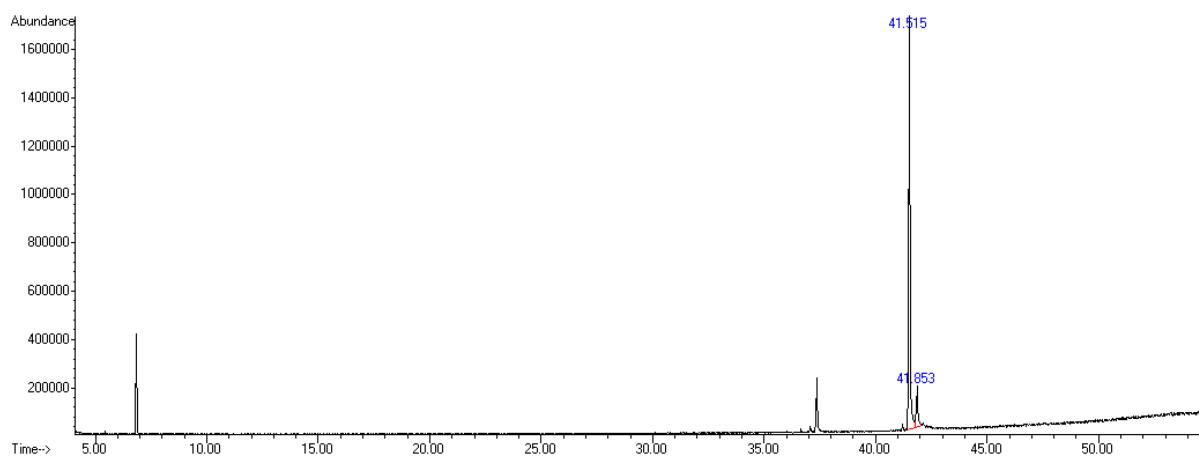

| peak # | R.T. min | first scan | max scan | last scan | PK TY | peak height | corr. area | corr. % max. | % of total |
|--------|----------|------------|----------|-----------|-------|-------------|------------|--------------|------------|
| 1      | 41.515   | 6370       | 6386     | 6434      | PV 2  | 1698318     | 66695306   | 100.00%      | 89.540%    |
| 2      | 41.853   | 6434       | 6444     | 6480      | UU 8  | 166707      | 7791058    | 11.68%       | 10.460%    |



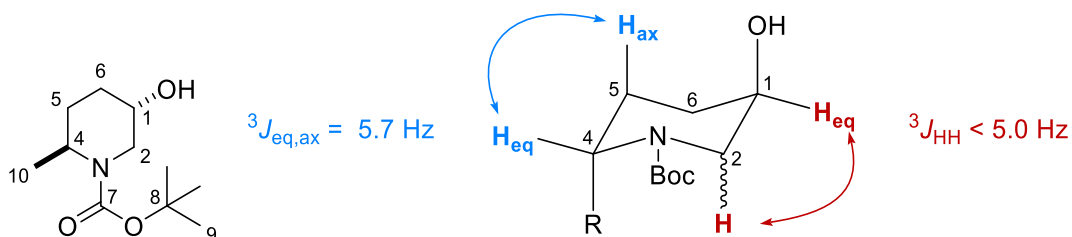

**2q**, white solid, procedure **A**: 4 mol% catalyst loading, 10 bar H<sub>2</sub>, solvent: *iso*-propanol (0.4 M, 1.0 mL). Boc-protection prior to isolation by addition of NEt<sub>3</sub> (3.0 equiv.) and Boc<sub>2</sub>O (3.0 equiv.). Purification with 20% to 30% EtOAc in pentane. 95% total yield, 87:13 d.r. determined by GC-MS. The major diastereomer was isolated and characterized (72% yield). The *trans*-configuration was determined based on the <sup>3</sup>J<sub>eq,ax</sub> couplings between H<sub>eq</sub>C1 & H<sub>ax</sub>C2, and H<sub>eq</sub>C4 & H<sub>ax</sub>C3. Determination of <sup>3</sup>J<sub>eq,ax</sub> coupling between H<sub>eq</sub>C4 & H<sub>ax</sub>C5 was possible with homonuclear decoupling experiments by irradiation at H<sub>3</sub>C10. Hydroxy and methyl group occupy the corresponding axial position. The *trans*-configuration was confirmed by a crystal structure.

<sup>1</sup>H NMR (599 MHz, CDCl<sub>3</sub>) δ 4.41 – 4.35 (dm, <sup>3</sup>J<sub>eq,ax</sub> = 5.7 Hz, 1H, H<sub>eq</sub>C4), 3.96 (ddm, <sup>2</sup>J<sub>HH</sub> = 14.3 Hz, <sup>3</sup>J<sub>eq,eq</sub> = 2.6 Hz, 1H, H<sub>eq</sub>C2), 3.90 (m, 1H, H<sub>eq</sub>C1), 3.04 – 2.98 (m, 1H, H<sub>ax</sub>C2), 2.06 (dm, <sup>2</sup>J<sub>HH</sub> = 13.8 Hz, 1H, H<sub>2</sub>C5), 1.79 – 1.70 (m, 1H, H<sub>2</sub>C6), 1.70 – 1.63 (m, 1H, H<sub>2</sub>C6), 1.45 (s, 9H, H<sub>3</sub>C9), 1.27 (dm, <sup>2</sup>J<sub>HH</sub> = 13.8 Hz, 1H, H<sub>2</sub>C5), 1.24 (s, 1H, HO), 1.12 (d, <sup>3</sup>J<sub>HH</sub> = 6.9 Hz, 3H, H<sub>3</sub>C10);

<sup>13</sup>C NMR (151 MHz, CDCl<sub>3</sub>) δ 156.1 (C7), 79.7 (C8), 64.8 (C1), 46.2 (C4), 44.7 (C2), 28.6 (C9), 25.4 (C6), 23.9 (C5), 15.4 (C10);

**ESI-MS** calculated [C<sub>11</sub>H<sub>21</sub>NO<sub>3</sub>+Na]<sup>+</sup> 238.1414, found: 238.1435;

**IR**  $\tilde{\nu}$  = 3449, 2967, 2895, 1651, 1422, 1362, 1335, 1248, 1153, 1090, 1034, 1018, 874, 831, 766, 638;

**GC-MS** (prior to purification):

Pd-catalyzed (*trans*)

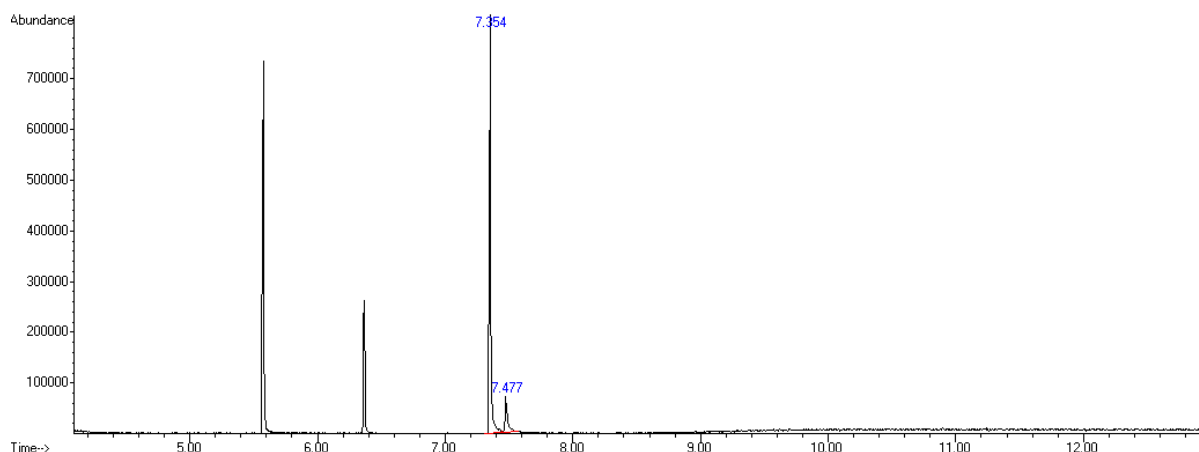

| peak # | R.T. min | first scan | max scan | last scan | PK TY | peak height | corr. area | corr. % max. | % of total |
|--------|----------|------------|----------|-----------|-------|-------------|------------|--------------|------------|
| 1      | 7.354    | 550        | 557      | 573       | BU    | 728975      | 6378940    | 100.00%      | 86.534%    |
| 2      | 7.477    | 573        | 579      | 597       | UB 2  | 66732       | 992664     | 15.56%       | 13.466%    |

Rh-catalyzed (*cis*)

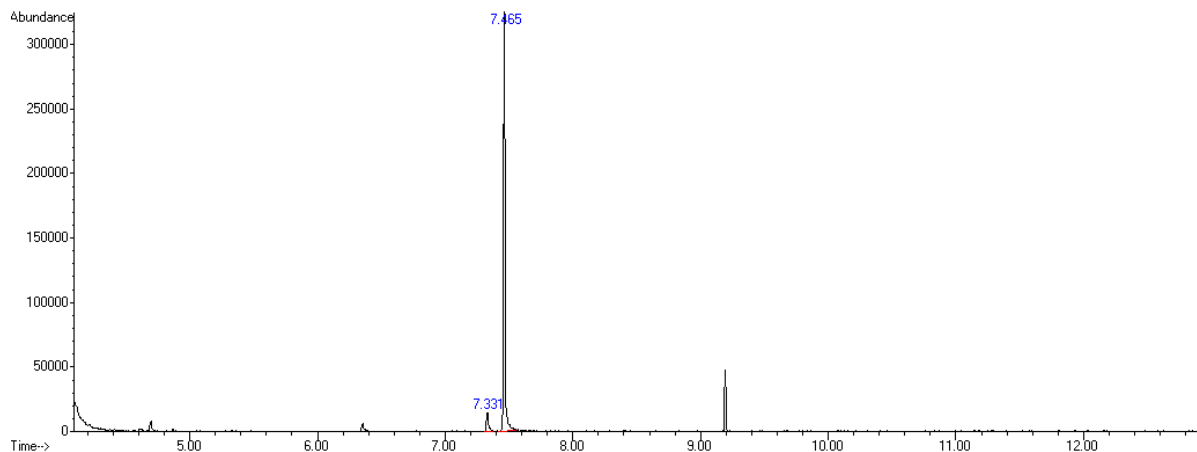

| peak # | R.T. min | first scan | max scan | last scan | PK TY | peak height | corr. area | corr. % max. | % of total |
|--------|----------|------------|----------|-----------|-------|-------------|------------|--------------|------------|
| 1      | 7.331    | 550        | 554      | 562       | M     | 15564       | 167464     | 6.80%        | 6.365%     |
| 2      | 7.465    | 568        | 576      | 593       | BB    | 274324      | 2463534    | 100.00%      | 93.635%    |

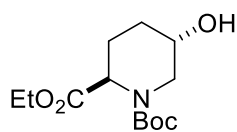

**2r**, colorless oil, procedure **A**: 4 mol% catalyst loading, 10 bar H<sub>2</sub>, solvent: *iso*-propanol (0.4 M, 1.0 mL). Boc-protection prior to isolation by addition of NEt<sub>3</sub> (3.0 equiv.) and Boc<sub>2</sub>O (3.0 equiv.). Purification with 10% to 30%

EtOAc in pentane. 62% total yield, 73:27 d.r. determined by GC-MS. The major diastereomer was isolated and characterized (47% yield).

The title compound exists as a mixture of multiple rotamers.

<sup>1</sup>H NMR (400 MHz, CDCl<sub>3</sub>) δ 4.70 (m, 1H), 4.28 – 3.93 (m, 3H), 3.61 (s, 1H), 2.69 (dt, *J* = 41.8, 11.4 Hz, 1H), 2.42 – 2.14 (m, 2H), 2.02 – 1.89 (m, 1H), 1.79 – 1.60 (m, 1H), 1.51 – 1.35 (m, 9H), 1.32 – 1.12 (m, 4H);

<sup>13</sup>C NMR (101 MHz, CDCl<sub>3</sub>) δ 171.6, 171.5, 155.6, 155.3, 80.6, 66.8, 66.6, 61.4, 54.1, 52.9, 48.6, 47.7, 30.6, 30.0, 29.8, 28.6, 28.4, 25.1, 24.9, 23.8, 21.9, 21.9, 14.4;

ESI-MS calculated [C<sub>13</sub>H<sub>23</sub>NO<sub>5</sub>+Na]<sup>+</sup> 296.1468, found: 296.1479;

IR  $\tilde{\nu}$  = 2978, 2362, 1734, 1696, 1684, 1395, 1368, 1340, 1240, 1146, 1072, 1022, 978, 874;

Analytical data are in good accordance with those previously reported for this compound.<sup>6</sup>

GC-MS (prior to purification):

Pd-catalyzed (*trans*)

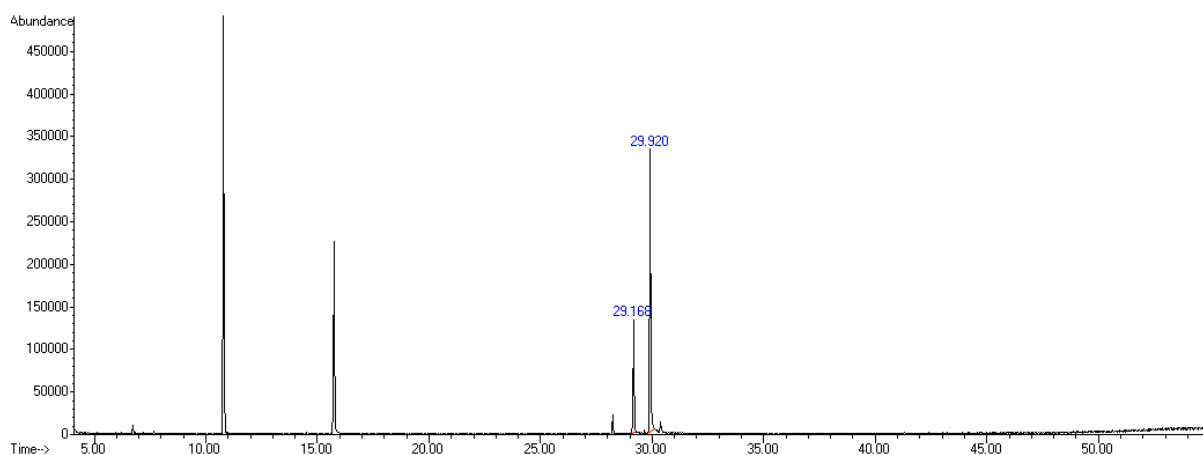

| peak # | R.T. min | first scan | max scan | last scan | PK TY | peak height | corr. area | corr. % max. | % of total |
|--------|----------|------------|----------|-----------|-------|-------------|------------|--------------|------------|
| 1      | 29.168   | 4263       | 4280     | 4302      | BU 2  | 132773      | 3857614    | 36.71%       | 26.851%    |
| 2      | 29.920   | 4386       | 4408     | 4441      | BU 3  | 333071      | 10509051   | 100.00%      | 73.149%    |

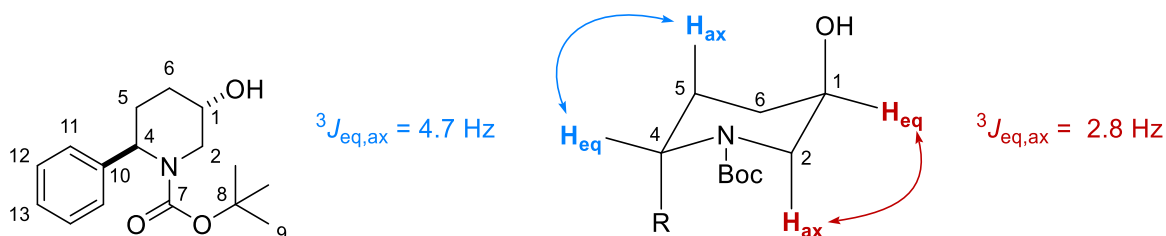

**2s**, white solid, procedure **A**: 4 mol% catalyst loading, 10 bar  $H_2$ , solvent: *iso*-propanol (0.2 M, 2.0 mL). Boc-protection prior to isolation by addition of  $NEt_3$  (1.5 equiv.) and  $Boc_2O$  (1.5 equiv.). Purification with 20% to 30% EtOAc in pentane. 75% total yield, 67:33 d.r. determined by GC-MS. The major diastereomer was isolated and characterized (40% yield). The *trans*-configuration was determined based on the  ${}^3J_{eq,ax}$  couplings between  $H_{eq}C1$  &  $H_{ax}C2$ , and  $H_{eq}C4$  &  $H_{ax}C5$ . Hydroxy and phenyl group occupy the corresponding axial positions.

**${}^1H$  NMR** (599 MHz,  $CDCl_3$ )  $\delta$  7.37 – 7.33 (m, 2H,  $H_{Ar}C12$ ), 7.27 – 7.20 (m, 3H,  $H_{Ar}C11$ ,  $H_{Ar}C13$ ), 5.44 (d,  ${}^3J_{eq,ax} = 4.7 \text{ Hz}$ , 1H,  $H_{eq}C4$ ), 4.09 (dd,  ${}^2J_{HH} = 14.6 \text{ Hz}$ ,  ${}^3J_{ax,eq} = 2.7 \text{ Hz}$ , 1H,  $H_{ax}C2$ ), 3.87 (dm,  ${}^3J_{eq,ax} = 2.8 \text{ Hz}$ , 1H,  $H_{eq}C1$ ), 2.91 (dd,  ${}^2J_{HH} = 14.4 \text{ Hz}$ ,  ${}^3J_{eq,eq} = 1.9 \text{ Hz}$ , 1H,  $H_{eq}C2$ ), 2.34 (dm,  ${}^2J_{HH} = 13.9 \text{ Hz}$ , 1H,  $H_2C5$ ), 2.12 (dm,  ${}^2J_{HH} = 14.4 \text{ Hz}$ , 1H,  $H_2C5$ ), 2.00 (bs, 1H,  $HO$ ), 1.75 – 1.68 (m, 1H,  $H_2C6$ ), 1.63 (dm,  ${}^2J_{HH} = 13.9 \text{ Hz}$ , 1H,  $H_2C6$ ), 1.48 (s, 9H,  $H_3C9$ );

**${}^{13}C$  NMR** (151 MHz,  $CDCl_3$ )  $\delta$  156.8 (C8), 139.5 (C10), 128.8, 126.8, 126.5, 80.3 (C8), 65.0 (C1), 53.4 (C4), 46.0 (C2), 28.6 (C9), 26.4 (C6), 21.7 (C5);

**ESI-MS** calculated  $[(C_{16}H_{23}NO_3)_2+Na]^+$  577.3248, found: 577.3262;

Analytical data are in good accordance with those previously reported for this compound.<sup>7</sup>

**GC-MS** (prior to purification):

Pd-catalyzed (*trans*)

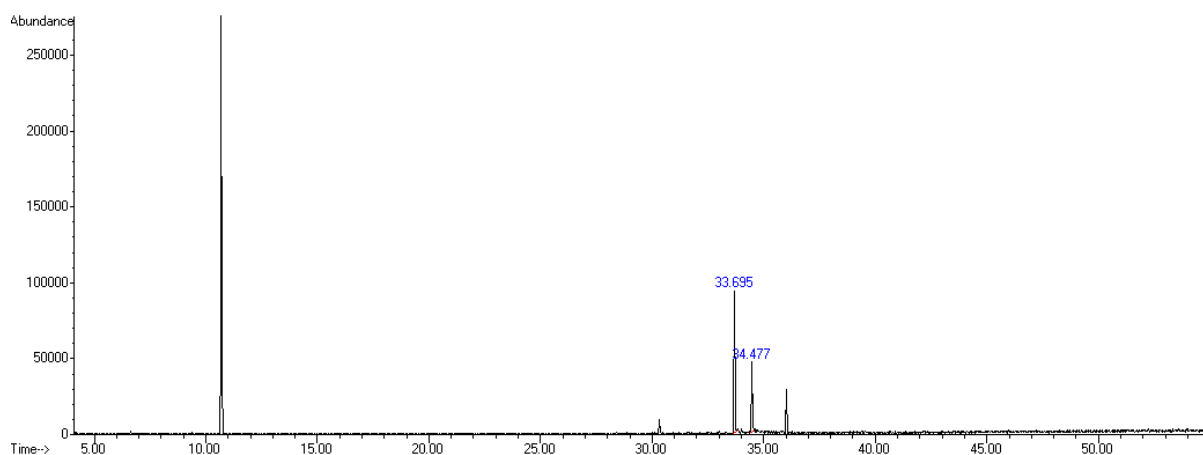

| peak # | R.T. min | first scan | max scan | last scan | PK TY | peak height | corr. area | corr. % max. | % of total |
|--------|----------|------------|----------|-----------|-------|-------------|------------|--------------|------------|
| 1      | 33.695   | 5040       | 5052     | 5074      | BB 2  | 92784       | 2634537    | 100.00%      | 66.696%    |
| 2      | 34.477   | 5175       | 5185     | 5210      | BB 3  | 44940       | 1315527    | 49.93%       | 33.304%    |

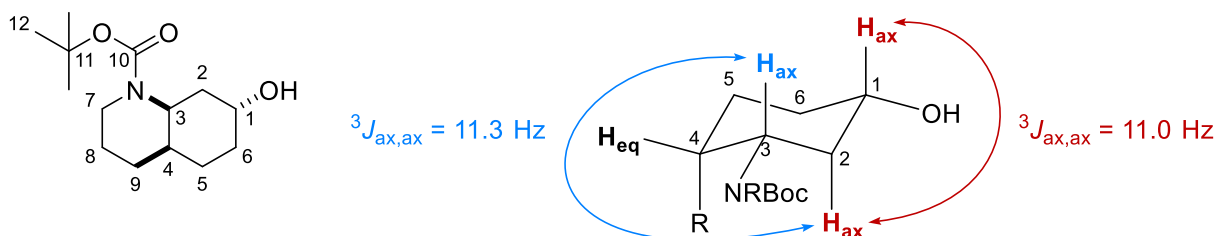

**2t**, yellow oil, procedure **A**: 4 mol% catalyst loading, 10 bar  $H_2$ , solvent: *iso*-propanol (0.4 M, 1.0 mL). Boc-protection prior to isolation by addition of  $NEt_3$  (3.0 equiv.) and  $Boc_2O$  (3.0 equiv.). Purification with 10% to 30% EtOAc in pentane. 91% total yield, 93:7 d.r. determined by GC-MS. The major diastereomer was isolated and characterized (78% yield). The *trans*-configuration was determined based on the  $^3J_{ax,ax}$  couplings between  $H_{ax}C1$  &  $H_{ax}C2$ , and  $H_{ax}C3$  &  $H_{ax}C2$ .

$^1H$  NMR (599 MHz,  $CDCl_3$ )  $\delta$  3.63 (tt,  $^2J_{HH} = 11.0$  Hz,  $^3J_{eq,ax} = 4.4$  Hz, 1H,  $H_{ax}C1$ ), 3.52 (ddd,  $^2J_{HH} = 13.7$  Hz,  $^3J_{eq,ax} = 6.1$  Hz,  $^3J_{eq,eq} = 3.8$  Hz, 1H,  $H_{eq}C7$ ), 3.20 (ddd,  $^2J_{HH} = 13.7$  Hz,  $^3J_{ax,ax} = 10.0$  Hz,  $^3J_{ax,eq} = 5.1$  Hz, 1H,  $H_{ax}C7$ ), 2.98 (td,  $^3J_{ax,ax} = 11.3$  Hz,  $^3J_{ax,eq} = 3.2$  Hz, 1H,  $H_{ax}C3$ ), 2.45 – 2.38 (m, 1H,  $H_2C2$ ), 2.12 (bs, 1H,  $HO$ ), 2.00 – 1.92 (m, 1H,  $H_2C6$ ), 1.75 – 1.62 (m, 3H,  $H_2C8$ ,  $H_2C5$ ,  $H_{eq}C9$ ), 1.60 – 1.50 (m, 1H,  $H_2C8$ ), 1.50 – 1.40 (m, 2H,  $H_2C2$ ,  $HC4$ ), 1.43 (s, 9H,  $H_3C12$ ), 1.33 – 1.20 (m, 1H,  $H_2C6$ ), 1.07 (ddd,  $^2J_{HH} = 12.9$  Hz,  $^3J_{ax,ax} = 9.0$  Hz,  $^3J_{ax,eq} = 4.0$  Hz, 1H,  $H_{ax}C9$ ), 1.05 – 0.95 (m, 1H,  $H_2C5$ );

$^{13}C$  NMR (151 MHz,  $CDCl_3$ )  $\delta$  155.4 (C10), 79.4 (C11), 69.7 (C1), 59.2 (C3), 40.7 (C2), 39.8 (C7), 37.4 (C4), 35.2 (C6), 29.9 (C5), 28.6 (C12), 27.0 (C9), 22.9 (C8);

**ESI-MS** calculated  $[C_{14}H_{25}NO_3+Na]^+$  278.1727, found: 278.1739;

**IR**  $\tilde{\nu}$  = 3428, 2972, 2928, 2861, 1686, 1668, 1408, 1364, 1250, 1165, 1146, 1059, 957, 772;

**GC-MS (prior to purification):**

Pd-catalyzed (*trans*)

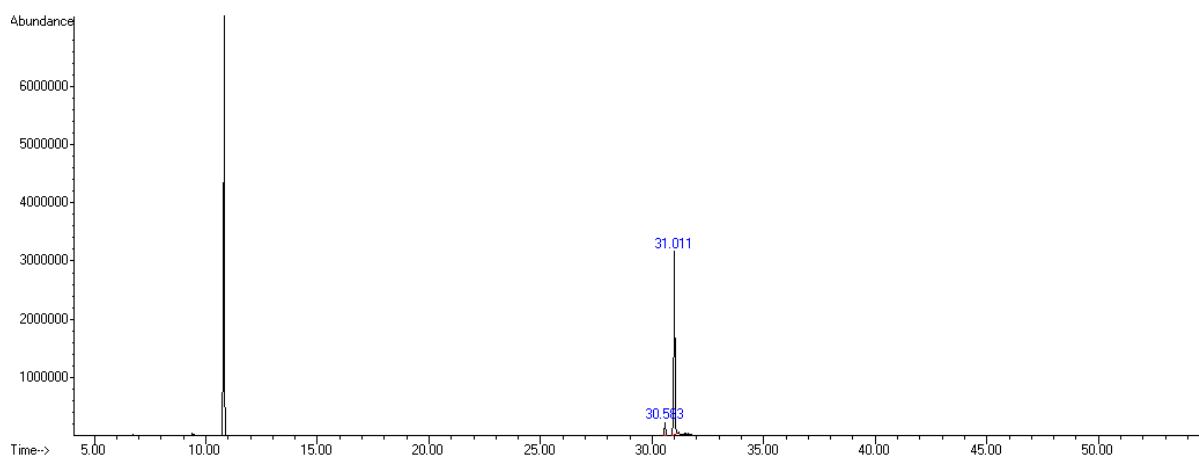

| peak # | R.T. min | first scan | max scan | last scan | PK TY | peak height | corr. area | corr. % max. | % of total |
|--------|----------|------------|----------|-----------|-------|-------------|------------|--------------|------------|
| 1      | 30.583   | 4508       | 4521     | 4537      | BB 2  | 222719      | 6821613    | 6.97%        | 6.513%     |
| 2      | 31.011   | 4573       | 4594     | 4619      | BU    | 3116749     | 97922847   | 100.00%      | 93.487%    |

#### 4.1 Scale-up Hydrogenation

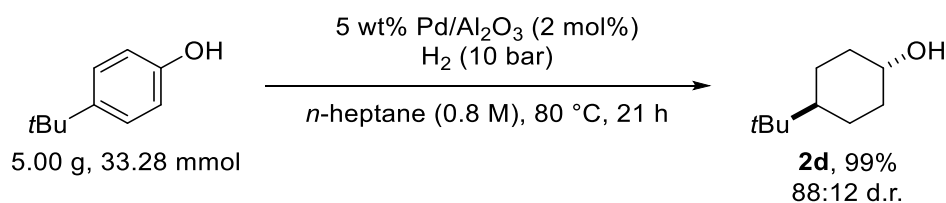

A 100 mL glass cylinder, equipped with a magnetic stirring bar, was charged with 5 wt% Pd/Al<sub>2</sub>O<sub>3</sub> (1.42 g, 0.66 mmol, 2 mol%), *p*-*tert*-butylphenol (5.00 g, 33.28 mmol, 1.0 equiv.) and *n*-heptane (42.0 mL, 0.8 M). The prepared glass cylinder was placed in a 400 mL stainless steel autoclave under air. The autoclave was pressurized and depressurized with hydrogen gas three times before the hydrogen pressure was set to 10 bar. The reaction mixture was stirred at 80 °C for 21 h. After the autoclave was carefully depressurized, the crude mixture was filtered over a pad of silica gel (eluent: 100% EtOAc) and both diastereomers were isolated together. White solid, 99% total yield (5.18 g, 33.15 mmol), 88:12 d.r. (determined by <sup>1</sup>H NMR). Characterization data was in accordance with **2d**.

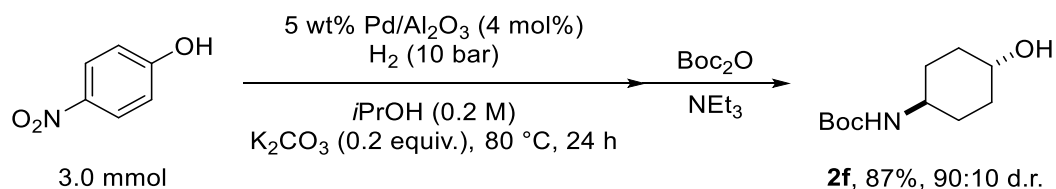

A 50 mL glass cylinder, equipped with a magnetic stirring bar, was charged with 5 wt% Pd/Al<sub>2</sub>O<sub>3</sub> (255 mg, 0.12 mmol, 4 mol%), *p*-nitrophenol (417 mg, 3.0 mmol, 1.0 equiv.), K<sub>2</sub>CO<sub>3</sub> (83 mg, 0.6 mmol, 0.2 equiv.) and *iso*-propanol (15.0 mL, 0.2 M). The prepared glass cylinder was placed in a 150 mL stainless steel autoclave under air. The autoclave was pressurized and depressurized with hydrogen gas three times before the hydrogen pressure was set to 10 bar. The reaction mixture was stirred at 80 °C for 24 h. After the autoclave was carefully depressurized, the crude mixture was purified by column chromatography on silica gel (40% to 50% EtOAc in pentane). White solid, 87% total yield (559 mg, 2.60 mmol), 90:10 d.r. The major isomer was isolated in 40% yield (257 mg, 1.19 mmol). Characterization data was in accordance with **2f**.

Pd-catalyzed (*trans*)

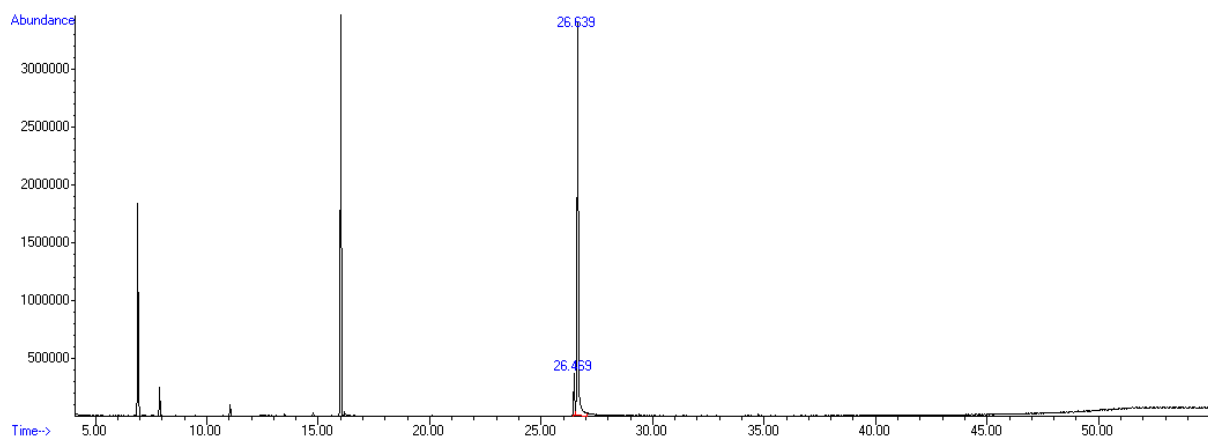

| peak # | R.T. min | first scan | max scan | last scan | PK TY | peak height | corr. area | corr. % max. | % of total |
|--------|----------|------------|----------|-----------|-------|-------------|------------|--------------|------------|
| 1      | 26.469   | 3809       | 3819     | 3836      | rM    | 365062      | 11688422   | 10.55%       | 9.542%     |
| 2      | 26.639   | 3837       | 3848     | 3894      | rM    | 3398491     | 110811935  | 100.00%      | 90.458%    |

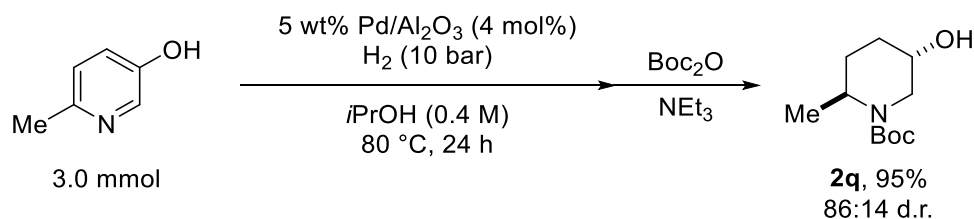

A 50 mL glass cylinder, equipped with a magnetic stirring bar, was charged with 5 wt% Pd/Al<sub>2</sub>O<sub>3</sub> (255 mg, 0.12 mmol, 4 mol%), 5-hydroxy-2-methylpyridine (327 mg, 3.0 mmol, 1.0 equiv.) and *iso*-propanol (7.5 mL, 0.4 M). The prepared glass cylinder was placed in a 150 mL stainless steel autoclave under air. The autoclave was pressurized and depressurized with hydrogen gas three times before the hydrogen pressure was set to 10 bar. The reaction mixture was stirred at 80 °C for 24 h. After the autoclave was carefully depressurized, the crude mixture was purified by column chromatography on silica gel (20% to 40% EtOAc in pentane). White solid, 95% total yield (613 mg, 2.85 mmol), 86:14 d.r. The major isomer was isolated in 60% yield (390 mg, 1.81 mmol). Characterization data was in accordance with **2q**.

**GC-MS** (prior to purification):

Pd-catalyzed (*trans*)

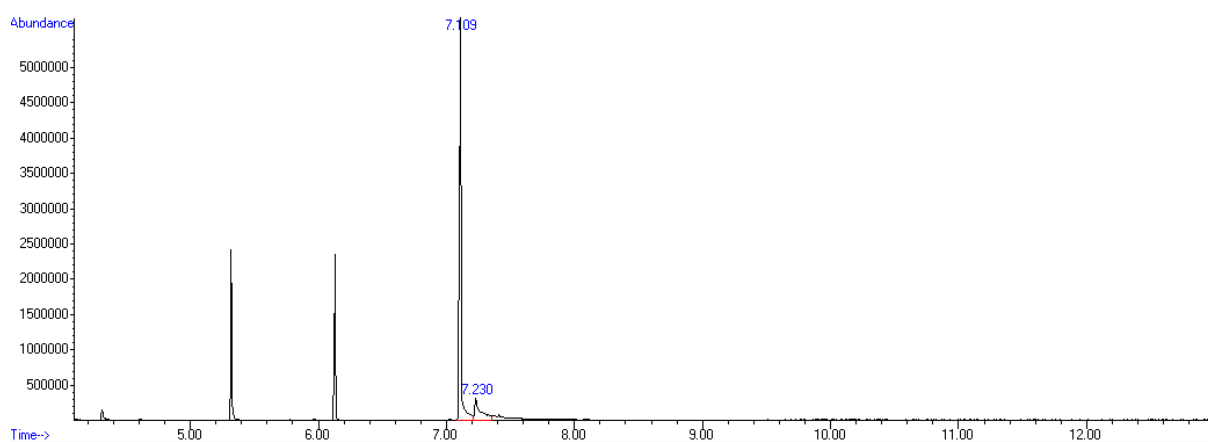

| peak # | R.T. min | first scan | max scan | last scan | PK TY | peak height | corr. area | corr. % max. | % of total |
|--------|----------|------------|----------|-----------|-------|-------------|------------|--------------|------------|
| 1      | 7.109    | 511        | 516      | 533       | M     | 6086368     | 59570902   | 100.00%      | 86.162%    |
| 2      | 7.230    | 533        | 536      | 557       | M     | 315088      | 9567170    | 16.06%       | 13.838%    |



## 5. Synthesis of *cis*-configured Cyclohexanols

General procedure B for the *cis*-selective hydrogenation of phenols

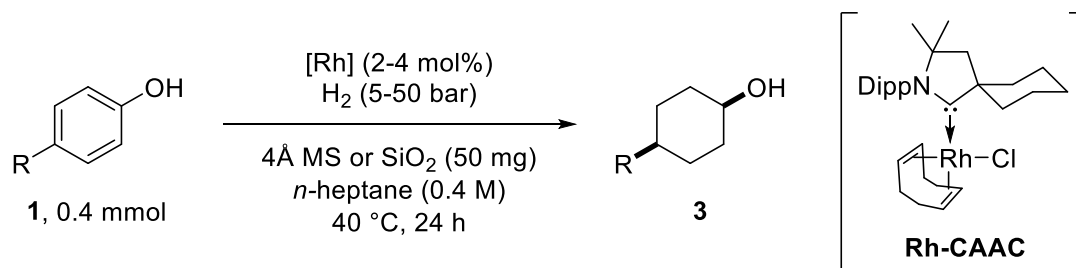

A 4 mL screw-cap glass vial, equipped with a magnetic stirring bar, was charged with [Rh(COD)Cl]<sub>2</sub> or [Rh-CAAC]<sup>8</sup> (2-4 mol%), catalyst support (50 mg) and solid substrates (0.4 mmol, 1.0 equiv.) as indicated. Solvent (1.0 mL, 0.4 M) and liquid substrates were added. The prepared glass vial was placed in a 150 mL stainless steel autoclave under air. The autoclave was pressurized and depressurized with hydrogen gas three times before the indicated pressure was set. The reaction mixture was stirred at 40 °C for 24 h. After the autoclave was carefully depressurized, the crude mixture was purified by column chromatography on silica gel.

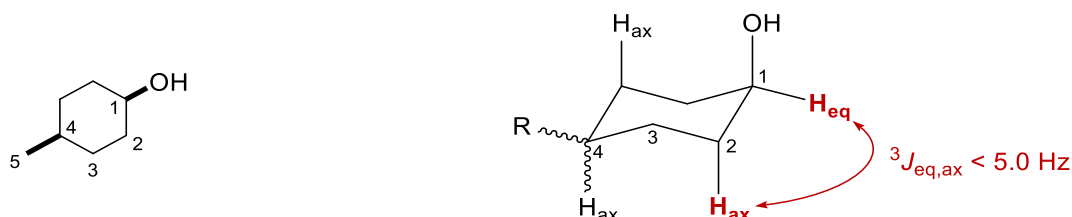

**3a**, colorless oil, procedure **B**: [Rh(COD)Cl]<sub>2</sub> 2 mol% catalyst loading, support: 4Å MS (50 mg), 5 bar H<sub>2</sub>, solvent: *n*-heptane (0.4 M, 1.0 mL), temperature: 40 °C. Purification with 10% to 20% Et<sub>2</sub>O in pentane. 77% total yield, 91:9 d.r. determined by <sup>1</sup>H NMR. The major diastereomer was isolated and characterized. The hydroxy group occupies the axial position based on the <sup>3</sup>J<sub>eq,ax</sub> coupling of *H*<sub>eq</sub>C1. The *J* coupling of *HC*4 could not be determined due to overlapping multiplets.

<sup>1</sup>H NMR (400 MHz, CDCl<sub>3</sub>) δ 3.94 (tt, <sup>3</sup>J<sub>HH</sub> = 4.8 Hz, <sup>3</sup>J<sub>HH</sub> = 3.1 Hz, 1H, *H*<sub>eq</sub>C1), 1.79 – 1.65 (m, 2H), 1.62 – 1.39 (m, 6H), 1.39 – 1.23 (m, 2H), 0.91 (d, <sup>3</sup>J<sub>HH</sub> = 6.1 Hz, 3H);

<sup>13</sup>C NMR (101 MHz, CDCl<sub>3</sub>) δ 67.1, 32.4, 31.3, 29.1, 21.8;

ESI-MS calculated [C<sub>7</sub>H<sub>14</sub>O+Na]<sup>+</sup> 137.0937, found: 137.0903.

Analytical data are in good accordance with those previously reported for this compound.<sup>1</sup>

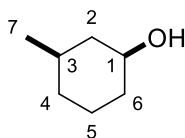

**3ab**, colorless oil, procedure **A**: 4 mol% catalyst loading, 10 bar H<sub>2</sub>, solvent: *n*-heptane (0.4 M, 1.0 mL). Purification with 10% Et<sub>2</sub>O in CH<sub>2</sub>Cl<sub>2</sub>. 86% total yield, 83:17 d.r. determined by <sup>1</sup>H NMR. The major diastereomer was isolated and characterized (77% yield). Procedure **B**: [Rh(COD)Cl]<sub>2</sub> 4 mol% catalyst loading, support: 4 Å MS (50 mg), 5 bar H<sub>2</sub>, solvent: *n*-heptane (0.4 M, 1.0 mL), temperature: 40 °C. 74% total yield, 73:27 d.r. determined by <sup>1</sup>H NMR. The major diastereomer was isolated and characterized (48% yield).

<sup>1</sup>H NMR (300 MHz, CDCl<sub>3</sub>) δ 3.57 (m, 1H, HC1), 2.00 – 1.88 (m, 2H), 1.80 – 1.70 (m, 1H), 1.69 (bs, 1H, HO), 1.59 (dm, <sup>2</sup>J<sub>HH</sub> = 12.9 Hz, 1H), 1.51 – 1.35 (m, 1H), 1.35 – 1.18 (m, 1H), 1.17 – 1.01 (m, 1H), 0.92 (d, <sup>3</sup>J<sub>HH</sub> = 6.6 Hz, 3H), 0.87 – 0.68 (m, 2H);

<sup>13</sup>C NMR (75 MHz, CDCl<sub>3</sub>) δ 71.0, 44.8, 35.6, 34.2, 31.6, 24.3, 22.5;

ESI-MS calculated [C<sub>7</sub>H<sub>14</sub>O+Na]<sup>+</sup> 137.0937, found: 137.0904.

Analytical data are in good accordance with those previously reported for this compound.<sup>1</sup>

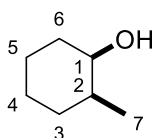

**3ac**, colorless oil, procedure **B**: [Rh(COD)Cl]<sub>2</sub> 2 mol% catalyst loading, support: 4 Å MS (50 mg), 5 bar H<sub>2</sub>, solvent: *n*-heptane (0.4 M, 1.0 mL), temperature: 40 °C. Purification with 5% to 30% Et<sub>2</sub>O in pentane. 70% total yield, >95:5 d.r. determined by <sup>1</sup>H NMR. The major diastereomer was isolated and characterized (63% yield).

<sup>1</sup>H NMR (400 MHz, CDCl<sub>3</sub>) δ 3.77 (m, 1H, HC1), 1.79 – 1.69 (m, 1H), 1.67 – 1.57 (m, 2H), 1.56 – 1.47 (m, 2H), 1.44 – 1.31 (m, 4H), 1.30 – 1.19 (m, 1H), 0.93 (d, <sup>3</sup>J<sub>HH</sub> = 6.9 Hz, 3H);

<sup>13</sup>C NMR (101 MHz, CDCl<sub>3</sub>) δ 71.3, 36.0, 32.7, 28.9, 24.7, 20.8, 17.1;

Analytical data are in good accordance with those previously reported for this compound.<sup>1</sup>

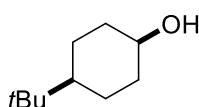

**3b**, white solid, procedure **B**: [Rh(COD)Cl]<sub>2</sub> 2 mol% catalyst loading, support: SiO<sub>2</sub> (50 mg), 10 bar H<sub>2</sub>, solvent: *n*-heptane (0.4 M, 1.0 mL), temperature: 40 °C. Purification with 5% to 20% EtOAc in pentane. 90% total yield, 93:7 d.r. determined by GC-MS. Both diastereomers were isolated and characterized together.

<sup>1</sup>H NMR (400 MHz, CDCl<sub>3</sub>) δ 4.03 (m, 1H, HC1), 1.87 – 1.79 (m, 2H), 1.58 – 1.42 (m, 4H), 1.37 (m, 2H), 1.24 (s, 1H), 0.99 (m, 1H), 0.86 (s, 9H);

<sup>13</sup>C NMR (101 MHz, CDCl<sub>3</sub>) δ 66.1, 48.2, 33.6, 32.7, 27.6, 21.1;

IR  $\tilde{\nu}$  = 3395, 2938, 2864, 1558, 1363, 1276, 1180, 1147, 1029, 1007, 958, 928, 904;

Analytical data are in good accordance with those previously reported for this compound.<sup>1</sup>

GC-MS (prior to purification):

Rh-catalyzed (*cis*)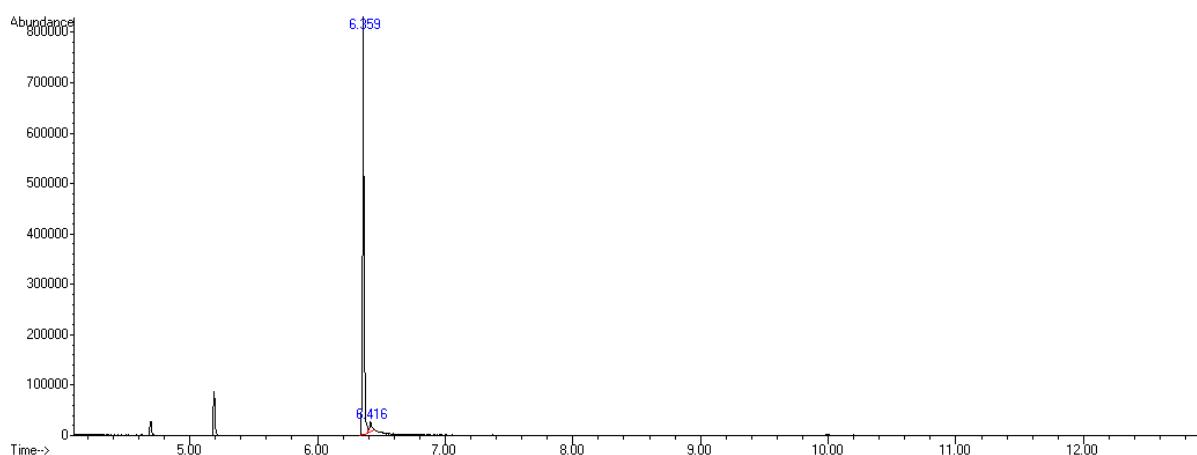

| peak # | R.T. min | first scan | max scan | last scan | PK TY | peak height | corr. area | corr. % max. | % of total |
|--------|----------|------------|----------|-----------|-------|-------------|------------|--------------|------------|
| 1      | 6.359    | 383        | 388      | 394       | M     | 855497      | 6529607    | 100.00%      | 93.283%    |
| 2      | 6.416    | 394        | 397      | 404       | M4    | 20459       | 470131     | 7.20%        | 6.717%     |

*t*Bu  **3c**, colorless oil, procedure **A**: 4 mol% catalyst loading, 10 bar H<sub>2</sub>, solvent: *n*-heptane (0.4 M, 1.0 mL). Purification with 30% Et<sub>2</sub>O in pentane. 80% total yield, 91:9 d.r. determined by <sup>1</sup>H NMR. The major diastereomer was isolated and characterized (73% yield). Procedure **B**: 2 mol% catalyst loading, 10 bar H<sub>2</sub>, solvent: *n*-heptane (0.4 M, 1.0 mL). Purification with 30% Et<sub>2</sub>O in pentane. 85% total yield, 66:34 d.r. determined by <sup>1</sup>H NMR.

**<sup>1</sup>H NMR** (400 MHz, CDCl<sub>3</sub>) δ 3.56 (dm, <sup>3</sup>J<sub>ax,ax</sub> = 10.7 Hz, 1H, H<sub>ax</sub>C1), 2.11 – 1.89 (m, 3H), 1.80 (dm, <sup>2</sup>J<sub>HH</sub> = 12.6 Hz, 1H), 1.67 (dm, <sup>2</sup>J<sub>HH</sub> = 12.3 Hz, 1H), 1.29 – 1.00 (m, 3H), 0.99 – 0.88 (m, 2H), 0.85 (s, 9H);

**<sup>13</sup>C NMR** (101 MHz, CDCl<sub>3</sub>) δ 72.0, 46.8, 37.3, 35.9, 32.5, 27.7, 26.4, 24.5;

**ESI-MS** calculated [C<sub>10</sub>H<sub>20</sub>O+Na]<sup>+</sup> 179.1406, found: 179.1401;

**IR**  $\tilde{\nu}$  = 3320, 2935, 2859, 1559, 1457, 1395, 1365, 1240, 1060, 1015, 976, 842;

Analytical data are in good accordance with those previously reported for this compound.<sup>1</sup>

BocHN 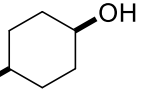 **3d**, white solid, procedure **B**: [Rh-CAAC] 2 mol% catalyst loading, support: SiO<sub>2</sub> (50 mg), 10 bar H<sub>2</sub>, solvent: *n*-heptane (0.4 M, 1.0 mL), temperature: 40 °C. Purification with 20% to 50% EtOAc in pentane. 98% total yield, 63:37 d.r. determined by GC-MS. The major diastereomer was isolated and characterized (47% yield).

**<sup>1</sup>H NMR** (300 MHz, CDCl<sub>3</sub>) δ 4.53 (s, 1H), 3.88 (t, <sup>3</sup>J<sub>HH</sub> = 3.9 Hz, 1H, HC1), 3.52 (s, 1H), 1.73 – 1.55 (m, 8H), 1.44 (s, 10H);

$^{13}\text{C}$  NMR (75 MHz,  $\text{CDCl}_3$ )  $\delta$  155.4, 79.3, 66.5, 47.9, 31.4, 28.6, 27.8;

ESI-MS calculated  $[\text{C}_{11}\text{H}_{21}\text{NO}_3+\text{Na}]^+$  238.1414, found: 238.1421;

IR  $\tilde{\nu}$  = 3355, 2980, 1696, 1684, 1558, 1521, 1507, 1173, 1070, 1026, 973, 954;

Analytical data are in good accordance with those previously reported for this compound.<sup>9</sup>

GC-MS (prior to purification):

Rh-catalyzed (*cis*)

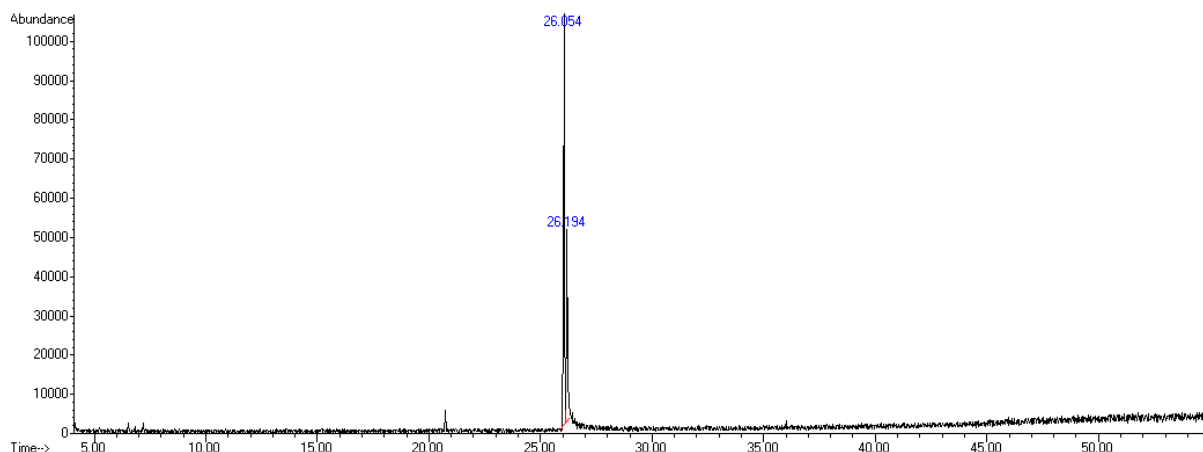

| peak # | R.T. min | first scan | max scan | last scan | PK TY | peak height | corr. area | corr. % max. | % of total |
|--------|----------|------------|----------|-----------|-------|-------------|------------|--------------|------------|
| 1      | 26.054   | 3713       | 3748     | 3762      | BV    | 103342      | 2837564    | 100.00%      | 62.600%    |
| 2      | 26.194   | 3762       | 3772     | 3799      | UV 3  | 48674       | 1695297    | 59.74%       | 37.400%    |

$[\text{Rh}(\text{COD})\text{Cl}]_2$ -catalyzed hydrogenation:

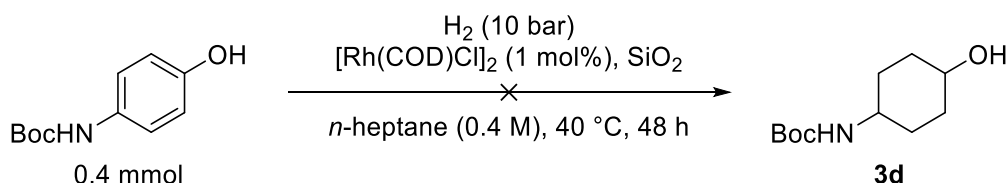

Product **3d** could not be observed by GC-MS or TLC. A possible pathway of decomposition is cleavage of the Boc-group and formation of the highly polar 4-aminocyclohexanol.

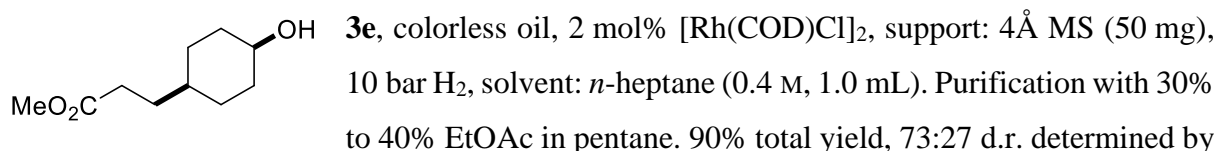

$^1\text{H}$  NMR. The major diastereomer was isolated and characterized (64% yield).

$^1\text{H}$  NMR (400 MHz,  $\text{CDCl}_3$ )  $\delta$  3.95 (pseudo-p,  $^3J_{\text{HH}} = 4.7$  Hz, 1H, *HC1*), 3.65 (s, 3H), 2.38 – 2.26 (m, 2H), 1.76 – 1.64 (m, 2H), 1.62 – 1.46 (m, 6H), 1.45 – 1.22 (m, 4H);

$^{13}\text{C}$  NMR (101 MHz,  $\text{CDCl}_3$ )  $\delta$  174.6, 66.9, 51.6, 36.0, 32.3, 31.9, 31.2, 26.7;

ESI-MS calculated  $[\text{C}_{10}\text{H}_{18}\text{O}_3+\text{Na}]^+$ : 209.1148, found: 209.1147;

IR  $\tilde{\nu}$  = 3372, 2924, 2855, 1736, 1437, 1258, 1202, 1159, 1072, 1034, 986, 877, 682, 644.

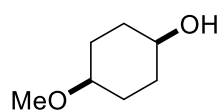

**3f**, yellow oil, procedure **B**: [Rh–CAAC] 2 mol% catalyst loading, support: SiO<sub>2</sub> (50 mg), 5 bar H<sub>2</sub>, solvent: *n*-heptane (0.4 M, 1.0 mL), temperature: 40 °C. Purification with 5% to 50% EtOAc in pentane. 76% total yield, 80:20 d.r. determined by GC-MS. Both diastereomers were isolated and characterized together.

<sup>1</sup>H NMR (400 MHz, CDCl<sub>3</sub>) δ 3.71 (m, 1H, HC1), 3.32 (m, 3H), 3.30 – 3.11 (m, 1H), 2.06 – 1.92 (m, 1H), 1.89 – 1.77 (m, 2H), 1.70 – 1.61 (m, 4H), 1.59 – 1.49 (m, 2H), 1.42 (s, 1H), 1.37 – 1.26 (m, 1H);

<sup>13</sup>C NMR (101 MHz, CDCl<sub>3</sub>) δ 78.2, 75.7, 69.8, 68.6, 56.1, 55.7, 32.7, 30.6, 29.0, 27.2;

ESI-MS calculated [C<sub>7</sub>H<sub>14</sub>O<sub>2</sub>+Na]<sup>+</sup> 153.0886, found: 153.0883;

Analytical data are in good accordance with those previously reported for this compound.<sup>10</sup>

GC-MS (prior to purification):

Rh-catalyzed (*cis*)

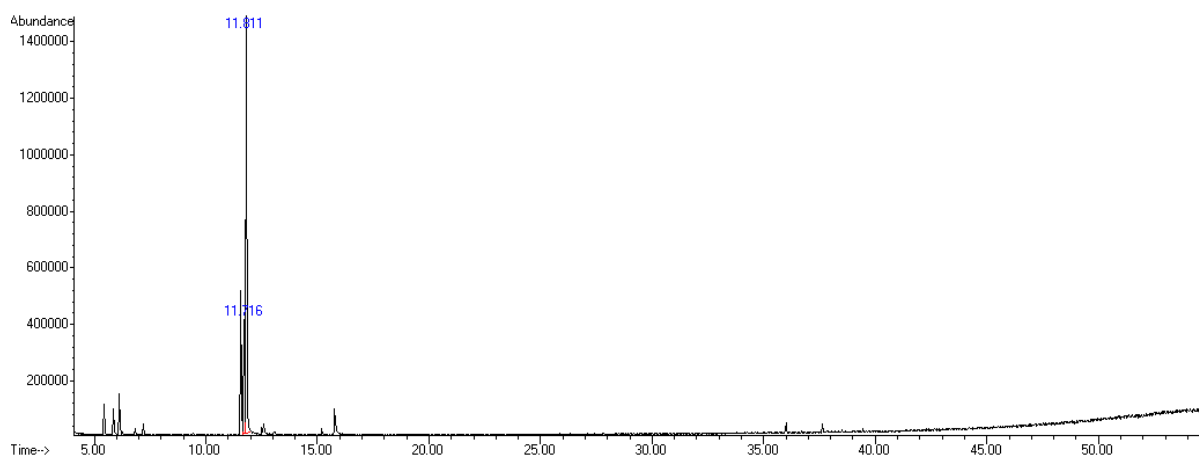

| peak # | R.T. min | first scan | max scan | last scan | PK TY | peak height | corr. area | corr. % max. | % of total |
|--------|----------|------------|----------|-----------|-------|-------------|------------|--------------|------------|
| 1      | 11.716   | 1294       | 1302     | 1310      | UU 2  | 401414      | 9929160    | 24.31%       | 19.557%    |
| 2      | 11.811   | 1310       | 1318     | 1357      | UB    | 1479182     | 40842072   | 100.00%      | 80.443%    |

[Rh(COD)Cl]<sub>2</sub>-catalyzed hydrogenation:

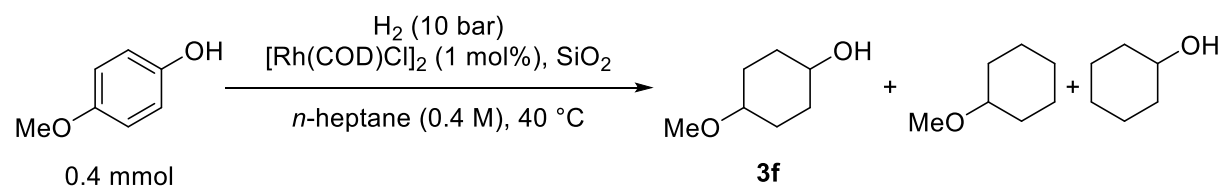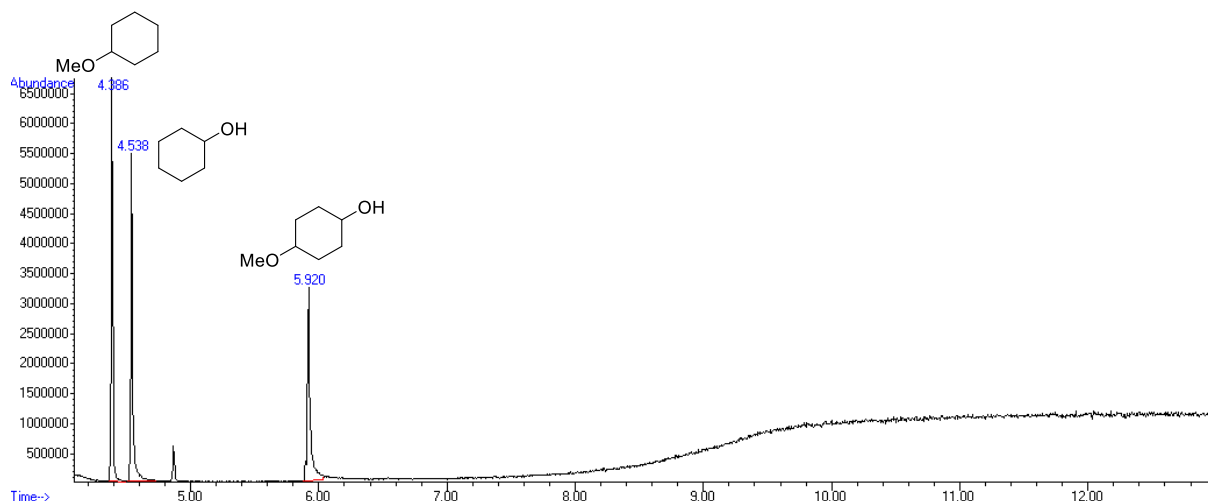

| peak # | R.T. min | first scan | max scan | last scan | PK TY | peak height | corr. area | corr. % max. | % of total |
|--------|----------|------------|----------|-----------|-------|-------------|------------|--------------|------------|
| 1      | 4.386    | 47         | 51       | 69        | M     | 6754259     | 56801634   | 94.62%       | 34.498%    |
| 2      | 4.538    | 73         | 77       | 112       | M     | 5469018     | 60030337   | 100.00%      | 36.459%    |
| 3      | 5.920    | 306        | 313      | 332       | M     | 3248350     | 47821214   | 79.66%       | 29.044%    |

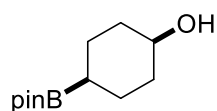

**3g**, white solid, procedure **B**: [Rh–CAAC] 2 mol% catalyst loading, support: 4Å MS (50 mg), 50 bar H<sub>2</sub>, solvent: *n*-heptane (0.4 M, 1.0 mL), temperature: 40 °C. Purification with 10% to 20% EtOAc in CH<sub>2</sub>Cl<sub>2</sub>. 94% total yield,

76:24 d.r. determined by GC-MS. The major diastereomer was isolated and characterized (52% yield).

**<sup>1</sup>H NMR** (400 MHz, CDCl<sub>3</sub>) δ 3.71 (m, 1H, HC1), 1.78 (m, 4H), 1.54 – 1.38 (m, 4H), 1.36 (bs, 1H), 1.24 (s, 12H), 1.11 (m, 1H);

**<sup>13</sup>C NMR** (101 MHz, CDCl<sub>3</sub>) δ 83.2, 69.6, 34.6, 25.0, 24.3;

**<sup>11</sup>B NMR** (128 MHz, CDCl<sub>3</sub>) δ 34.4 (bs);

**ESI-MS** calculated [C<sub>12</sub>H<sub>23</sub>BO<sub>3</sub>Si+Na]<sup>+</sup>: 249.1632, found: 249.1648;

**IR**  $\tilde{\nu}$  = 3309, 2987, 2926, 2852, 1370, 1307, 1224, 1143, 1062, 1052, 972, 859;

Analytical data are in good accordance with those previously reported for this compound.<sup>11</sup>

**GC-MS** (prior to purification):

### Rh-catalyzed (*cis*)

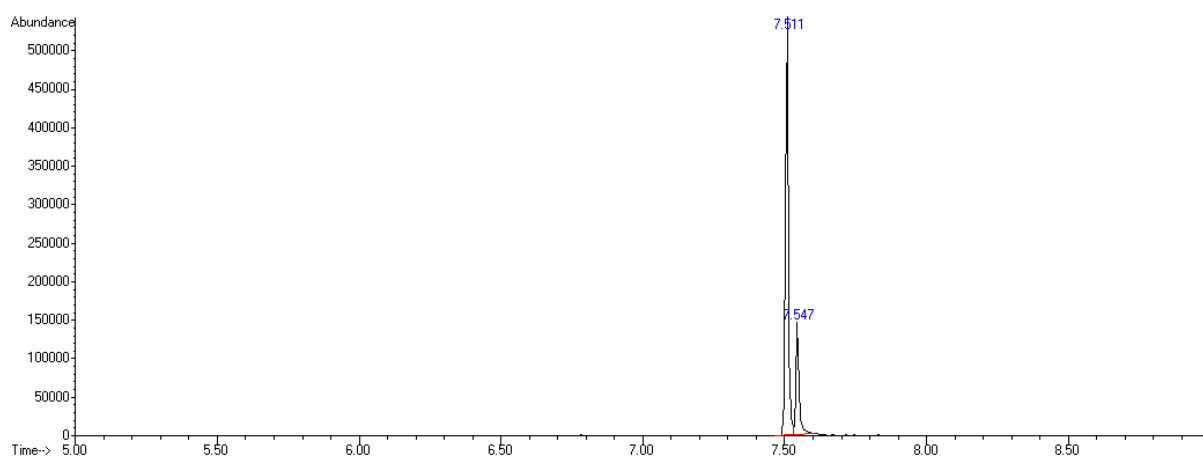

| peak # | R.T. min | first scan | max scan | last scan | PK TY | peak height | corr. area | corr. % max. | % of total |
|--------|----------|------------|----------|-----------|-------|-------------|------------|--------------|------------|
| 1      | 7.511    | 577        | 584      | 588       | BV    | 496633      | 3652472    | 100.00%      | 76.189%    |
| 2      | 7.547    | 588        | 590      | 601       | VB    | 123847      | 1141484    | 31.25%       | 23.811%    |

### [Rh(COD)Cl]<sub>2</sub>-catalyzed hydrogenation:

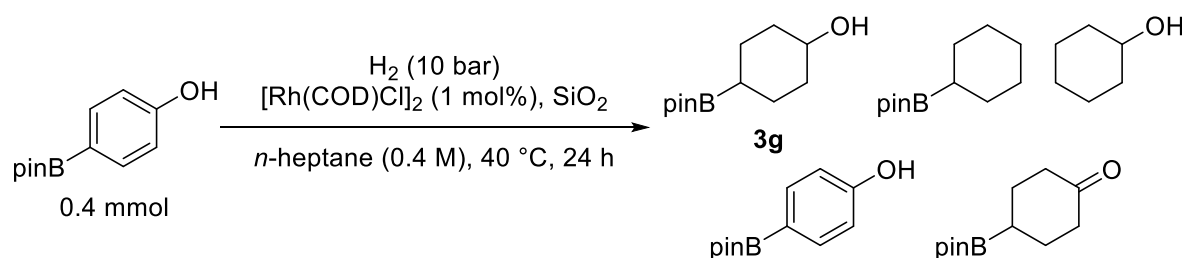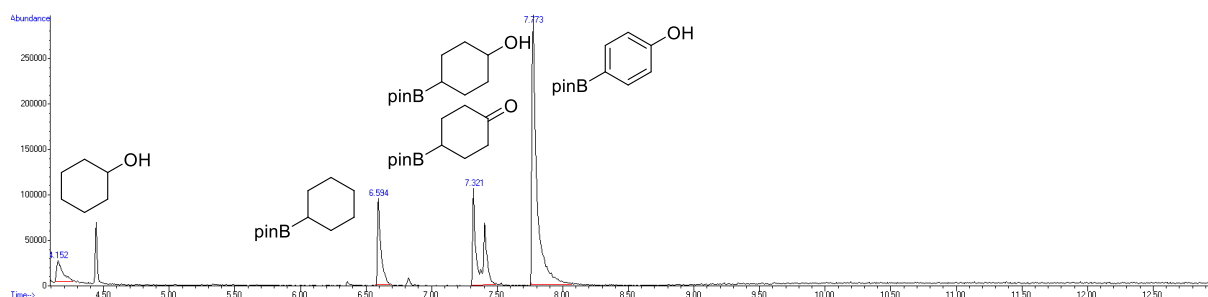

| peak # | R.T. min | first scan | max scan | last scan | PK TY | peak height | corr. area | corr. % max. | % of total |
|--------|----------|------------|----------|-----------|-------|-------------|------------|--------------|------------|
| 1      | 4.152    | 8          | 11       | 30        | M5    | 23721       | 750886     | 10.29%       | 5.946%     |
| 2      | 6.594    | 425        | 428      | 443       | M2    | 96255       | 1750484    | 23.98%       | 13.861%    |
| 3      | 7.321    | 549        | 552      | 580       | M3    | 107078      | 2827739    | 38.74%       | 22.391%    |
| 4      | 7.773    | 626        | 629      | 679       | M     | 296555      | 7299931    | 100.00%      | 57.803%    |

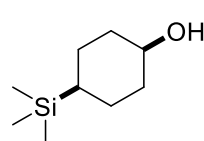

**3h**, white solid, procedure **B**: [Rh-CAAC] 2 mol% catalyst loading, support: 4Å MS (50 mg), 20 bar H<sub>2</sub>, solvent: *n*-heptane (0.4 M, 1.0 mL), temperature: 40 °C. Purification with 10% to 30% Et<sub>2</sub>O in pentane. 92% total yield, 78:22 d.r. determined by GC-MS. The (volatile) major diastereomer was isolated and characterized (71% yield).

$^1\text{H NMR}$  (400 MHz,  $\text{CDCl}_3$ )  $\delta$  4.07 (m,  $\text{HC1}$ ), 1.82 – 1.71 (m, 2H), 1.60 – 1.40 (m, 6H), 1.31 (s, 1H,  $\text{HO}$ ), 0.56 (m, 1H,  $\text{HC4}$ ),  $-0.05$  (s, 9H,  $\text{H}_3\text{C7}$ );

$^{13}\text{C NMR}$  (101 MHz,  $\text{CDCl}_3$ )  $\delta$  66.9 (C1), 34.2, 25.6, 21.1,  $-3.3$  (C7);

ESI-MS calculated  $[\text{C}_9\text{H}_{20}\text{O}_3\text{Si}+\text{Na}]^+$ : 195.1176, found: 195.1180;

IR  $\tilde{\nu}$  = 3308, 2918, 1453, 1273, 1244, 1086, 999, 872, 829, 766, 745, 702, 687, 610;

GC-MS (prior to purification):

Rh-catalyzed (*cis*)

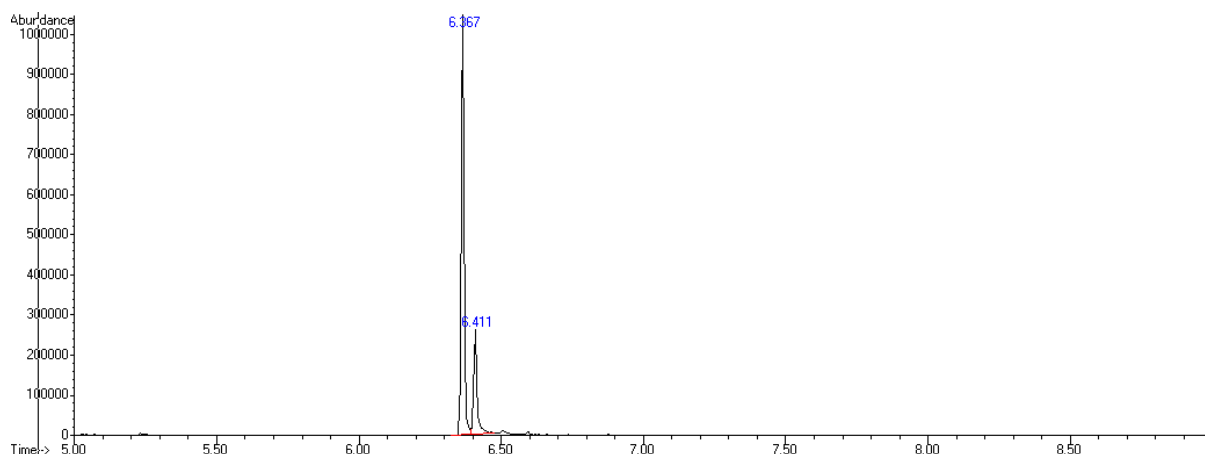

| peak # | R.T. min | first scan | max scan | last scan | PK TY | peak height | corr. area | corr. % max. | % of total |
|--------|----------|------------|----------|-----------|-------|-------------|------------|--------------|------------|
| 1      | 6.367    | 382        | 389      | 393       | BV    | 999551      | 7863922    | 100.00%      | 77.509%    |
| 2      | 6.411    | 393        | 397      | 408       | UB    | 224652      | 2281920    | 29.02%       | 22.491%    |

$[\text{Rh}(\text{COD})\text{Cl}]_2$ -catalyzed hydrogenation:

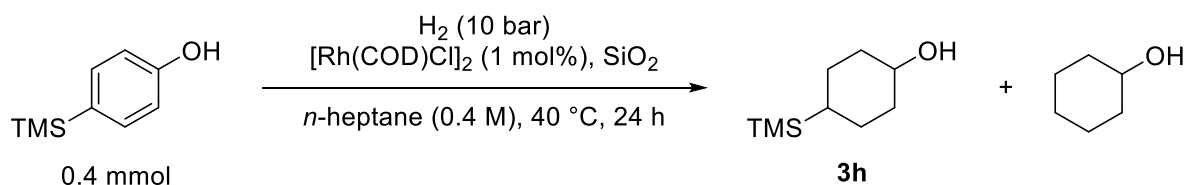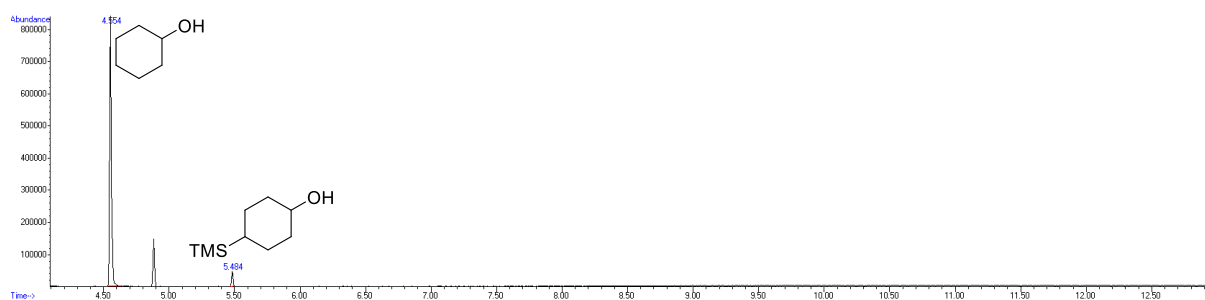

| peak # | R.T. min | first scan | max scan | last scan | PK TY | peak height | corr. area | corr. % max. | % of total |
|--------|----------|------------|----------|-----------|-------|-------------|------------|--------------|------------|
| 1      | 4.554    | 76         | 80       | 94        | M     | 856880      | 7430607    | 100.00%      | 95.223%    |
| 2      | 5.484    | 236        | 238      | 242       | M     | 47633       | 372763     | 5.02%        | 4.777%     |



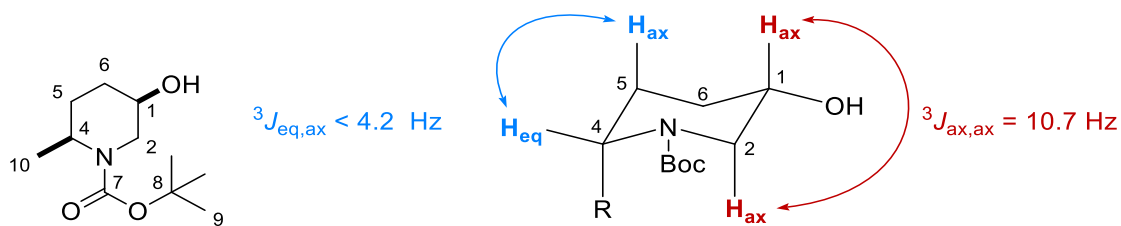

**3i**, off-white solid, procedure **B**: [Rh–CAAC] 2 mol% catalyst loading, support: 4Å MS (50 mg), 10 bar H<sub>2</sub>, solvent: *iso*-propanol (0.4 M, 1.0 mL), temperature: 40 °C. Boc-protection prior to isolation by addition of NEt<sub>3</sub> (1.5 equiv.) and Boc<sub>2</sub>O (1.5 equiv.). Purification with 10% to 20% EtOAc in pentane. 98% total yield, 94:6 d.r. determined by GC-MS. The major diastereomer was isolated and characterized (88% yield). The *cis*-configuration was determined based on the <sup>3</sup>J<sub>ax,ax</sub> coupling between H<sub>ax</sub>C1 & H<sub>ax</sub>C2 and <sup>3</sup>J<sub>eq,ax</sub> coupling between H<sub>eq</sub>C4 & H<sub>ax</sub>C5. Determination of <sup>3</sup>J<sub>eq,ax</sub> coupling between H<sub>eq</sub>C4 & H<sub>ax</sub>C5 was possible with homonuclear decoupling experiments by irradiation at H<sub>3</sub>C10. The hydroxy group occupies the equatorial position, whereas the methyl group is in the axial position.

<sup>1</sup>H NMR (599 MHz, CDCl<sub>3</sub>) δ 4.32 (dm, <sup>3</sup>J<sub>eq,ax</sub> < 4.2 Hz, 1H, H<sub>eq</sub>C4), 4.12 – 4.05 (m, 1H, H<sub>eq</sub>C2), 3.56 (dm, <sup>3</sup>J<sub>ax,ax</sub> = 10.7 Hz, 1H, H<sub>ax</sub>C1), 2.60 (dd, <sup>2</sup>J<sub>HH</sub> = 12.8 Hz, <sup>3</sup>J<sub>ax,ax</sub> = 10.7 Hz, 1H, H<sub>ax</sub>C2), 2.18 (bs, 1H, HO), 1.86 (dm, <sup>2</sup>J<sub>HH</sub> = 14.0 Hz, 1H, H<sub>2</sub>C6), 1.73 – 1.64 (m, 1H, H<sub>2</sub>C5), 1.58 – 1.50 (m, 2H, H<sub>2</sub>C5, H<sub>2</sub>C6), 1.44 (s, 9H, H<sub>3</sub>C9), 1.12 (d, <sup>3</sup>J<sub>HH</sub> = 6.9 Hz, 3H, H<sub>3</sub>C10);

<sup>13</sup>C NMR (151 MHz, CDCl<sub>3</sub>) δ 154.9 (C7), 79.7 (C8), 67.6 (C1), 45.3 (C2), 45.1 (C4, overlapped), 28.6 (C9), 28.5 (C5), 28.4 (C6), 15.6 (C10);

ESI-MS calculated [C<sub>11</sub>H<sub>21</sub>NO<sub>3</sub>+Na]<sup>+</sup>: 238.1414, found: 238.1424;

IR  $\tilde{\nu}$  = 3470, 2945, 1668, 1418, 1368, 1344, 1256, 1240, 1157, 1144, 1071, 1028, 999, 871, 768;

GC-MS (prior to purification):

Rh-catalyzed (*cis*)

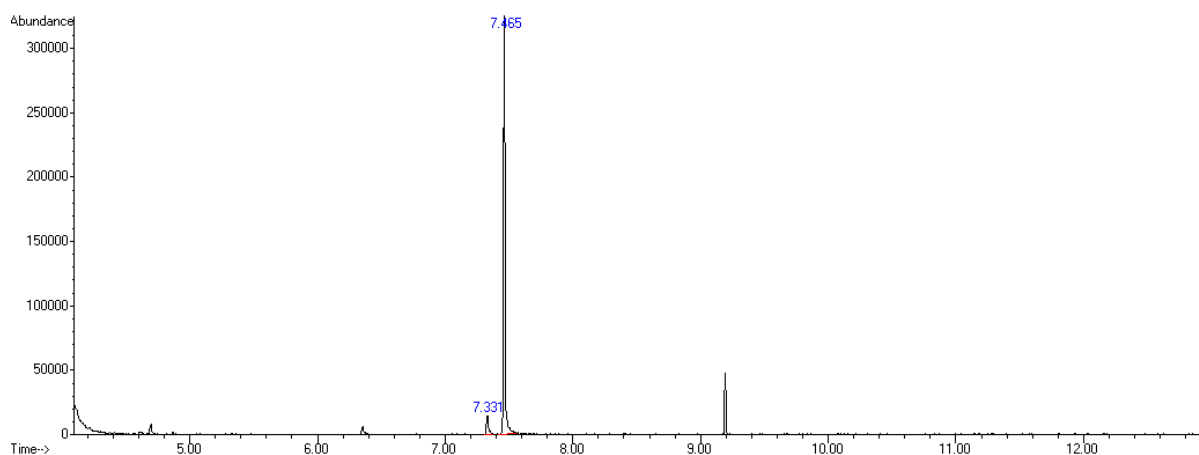

| peak # | R.T. min | first scan | max scan | last scan | PK TY | peak height | corr. area | corr. % max. | % of total |
|--------|----------|------------|----------|-----------|-------|-------------|------------|--------------|------------|
| 1      | 7.331    | 550        | 554      | 562       | M     | 15564       | 167464     | 6.80%        | 6.365%     |
| 2      | 7.465    | 568        | 576      | 593       | BB    | 274324      | 2463534    | 100.00%      | 93.635%    |

[Rh(COD)Cl]<sub>2</sub>-catalyzed hydrogenation:

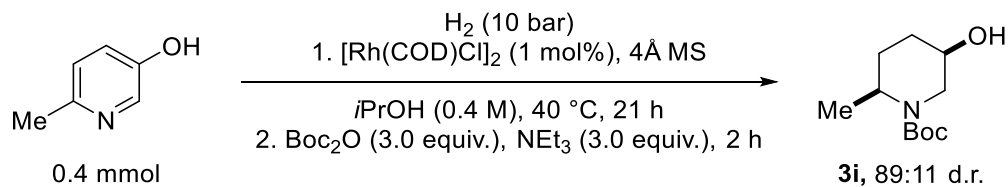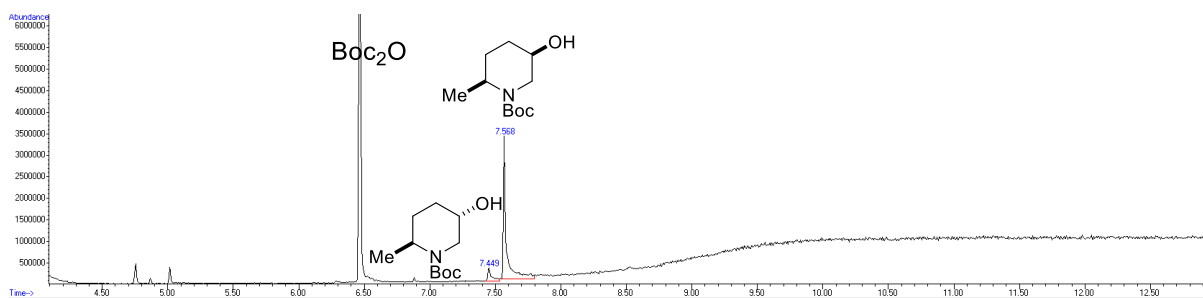

| peak # | R.T. min | first scan | max scan | last scan | PK TY | peak height | corr. area | corr. % max. | % of total |
|--------|----------|------------|----------|-----------|-------|-------------|------------|--------------|------------|
| 1      | 7.449    | 569        | 574      | 588       | M3    | 301624      | 6506353    | 12.81%       | 11.352%    |
| 2      | 7.568    | 591        | 594      | 633       | M     | 3292835     | 50810545   | 100.00%      | 88.648%    |

## 6. Synthesis of Cyclohexanones

General procedure C for the reduction of phenols to ketones

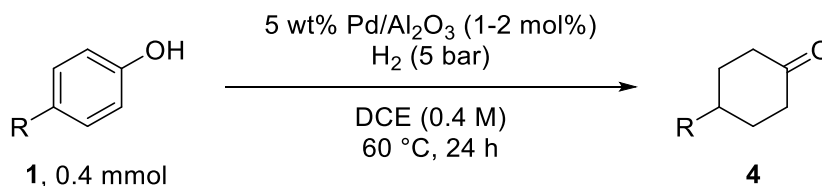

A 4 mL screw-cap glass vial, equipped with a magnetic stirring bar, was charged with 5 wt% Pd/Al<sub>2</sub>O<sub>3</sub> (1-2 mol%) and solid substrates (0.4 mmol, 1.0 equiv.) as indicated. 1,2-dichloroethane (1.0 mL, 0.4 M) and liquid substrates were added. The prepared glass vial was placed in a 150 mL stainless steel autoclave under air. The autoclave was pressurized and depressurized with hydrogen gas three times before the indicated pressure was set. The reaction mixture was stirred at 60 °C for 24 h. After the autoclave was carefully depressurized, the crude mixture was purified by column chromatography on silica gel.

**4a**, colorless oil, procedure C: 1 mol% catalyst loading, 5 bar H<sub>2</sub>. Purification with 50% CH<sub>2</sub>Cl<sub>2</sub> in pentane. 81% yield.

<sup>1</sup>H NMR (400 MHz, CDCl<sub>3</sub>) δ 2.38 – 2.28 (m, 4H), 2.06 – 1.95 (m, 2H), 1.94 – 1.81 (m, 1H), 1.48 – 1.35 (m, 2H), 1.02 (d, <sup>3</sup>J = 6.5 Hz, 3H);

<sup>13</sup>C NMR (101 MHz, CDCl<sub>3</sub>) δ 211.3, 41.0, 34.9, 31.3, 21.2;

GC-MS (EI) 111.9 [M]<sup>+</sup> (100);

IR  $\tilde{\nu}$  = 2955, 2929, 1754, 1714, 1459, 1288, 1244, 1185, 1124, 1047, 1004, 895, 806, 737;

Analytical data are in good accordance with those previously reported for this compound.<sup>1</sup>

GC-MS spectrum of the crude reaction mixture for product **4a**:

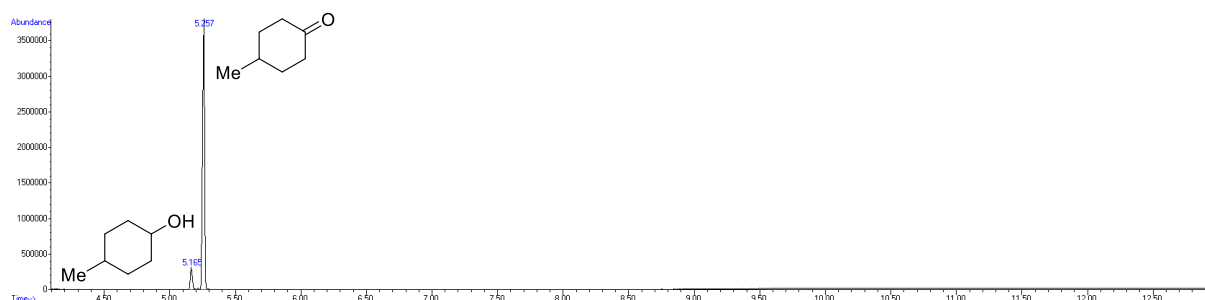

| peak # | R.T. min | first scan | max scan | last scan | PK TY | peak height | corr. area | corr. % max. | % of total |
|--------|----------|------------|----------|-----------|-------|-------------|------------|--------------|------------|
| 1      | 5.165    | 180        | 184      | 191       | M     | 313258      | 2747767    | 7.83%        | 7.264%     |
| 2      | 5.257    | 196        | 200      | 207       | M     | 3978476     | 35078935   | 100.00%      | 92.736%    |

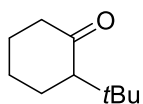

**4b**, colorless oil, procedure **C**: 2 mol% catalyst loading, 5 bar H<sub>2</sub>. Purification with 5% EtOAc in pentane. 85% yield.

<sup>1</sup>H NMR (400 MHz, CDCl<sub>3</sub>) δ 2.33 – 2.22 (m, 2H), 2.20 – 2.08 (m, 2H), 2.08 – 1.98 (m, 1H), 1.91 – 1.82 (m, 1H), 1.73 – 1.56 (m, 2H), 1.53 – 1.38 (m, 1H), 0.97 (s, 9H);

<sup>13</sup>C NMR (101 MHz, CDCl<sub>3</sub>) δ 213.0, 60.4, 44.4, 32.0, 30.0, 28.8, 27.8, 26.2;

ESI-MS calculated [C<sub>10</sub>H<sub>18</sub>O+Na]<sup>+</sup>: 177.1250, found: 177.1250.

Analytical data are in good accordance with those previously reported for this compound.<sup>12</sup>

GC-MS spectrum of the crude reaction mixture for product **4b**:

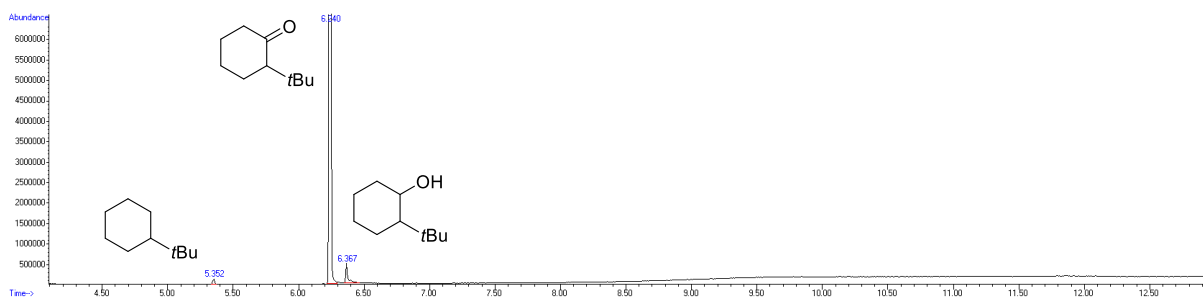

| peak # | R.T. min | first scan | max scan | last scan | PK TY | peak height | corr. area | corr. % max. | % of total |
|--------|----------|------------|----------|-----------|-------|-------------|------------|--------------|------------|
| 1      | 5.352    | 213        | 216      | 220       | M     | 121294      | 1007573    | 0.27%        | 0.262%     |
| 2      | 6.240    | 363        | 367      | 377       | M     | 39310063    | 376127903  | 100.00%      | 97.963%    |
| 3      | 6.367    | 385        | 389      | 422       | M     | 483594      | 6812769    | 1.81%        | 1.774%     |

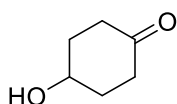

**4c**, yellow oil, procedure **C**: 2 mol% catalyst loading, 5 bar H<sub>2</sub>. Purification with 30% to 50% EtOAc in pentane. 50% yield.

<sup>1</sup>H NMR (400 MHz, CDCl<sub>3</sub>) δ 4.18 (tt, *J* = 6.6, 3.3 Hz, 1H), 2.68 – 2.52 (m, 2H), 2.36 – 2.23 (m, 2H), 2.10 – 1.91 (m, 4H), 1.86 (bs, 1H);

<sup>13</sup>C NMR (101 MHz, CDCl<sub>3</sub>) δ 211.1, 77.2, 66.4, 37.3, 33.9;

ESI-MS calculated [C<sub>6</sub>H<sub>10</sub>O<sub>2</sub>+Na]<sup>+</sup> 137.0573, found: 137.0556.

Analytical data are in good accordance with those previously reported for this compound.<sup>13</sup>

GC-MS spectrum of the crude reaction mixture for product **4c**:

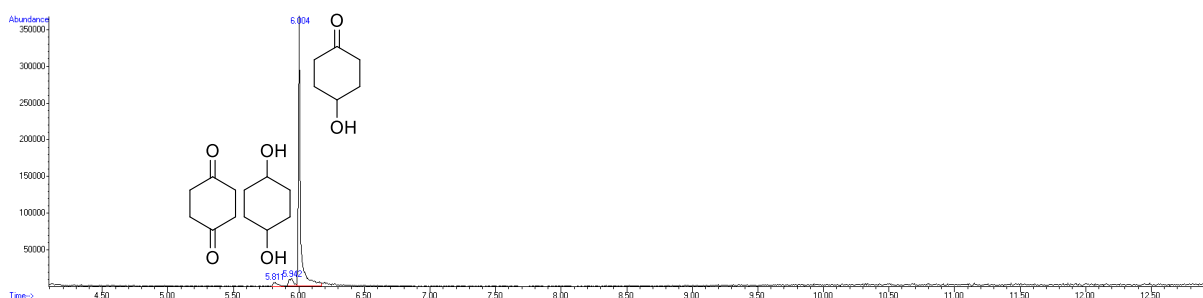

| peak # | R.T. min | first scan | max scan | last scan | PK TY | peak height | corr. area | corr. % max. | % of total |
|--------|----------|------------|----------|-----------|-------|-------------|------------|--------------|------------|
| 1      | 5.811    | 291        | 294      | 307       | M4    | 5948        | 141506     | 3.52%        | 3.220%     |
| 2      | 5.942    | 312        | 317      | 324       | M8    | 10037       | 227677     | 5.66%        | 5.181%     |
| 3      | 6.004    | 324        | 327      | 356       | M     | 367808      | 4025598    | 100.00%      | 91.600%    |

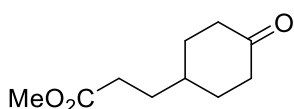

**4d**, white solid, procedure **C**: 2 mol% catalyst loading, 5 bar H<sub>2</sub>. Purification with 20% to 30% EtOAc in pentane. 70% yield.

<sup>1</sup>H NMR (500 MHz, CDCl<sub>3</sub>) δ 3.68 (s, 3H), 2.41 – 2.26 (m, 6H), 2.08 – 2.01 (m, 2H), 1.79 – 1.69 (m, 1H), 1.69 – 1.63 (m, 2H), 1.46 – 1.34 (m, 2H);

<sup>13</sup>C NMR (126 MHz, CDCl<sub>3</sub>) δ 211.9, 174.1, 51.8, 40.7, 35.6, 32.4, 32.0, 30.6;

ESI-MS calculated [C<sub>10</sub>H<sub>16</sub>O<sub>3</sub>+Na]<sup>+</sup>: 207.0992, found: 207.1009;

IR  $\tilde{\nu}$  = 2953, 2930, 1734, 1713, 1437, 1381, 1319, 1267, 1198, 1167, 1144, 980, 852, 733, 702.

GC-MS spectrum of the crude reaction mixture for product **4d**:

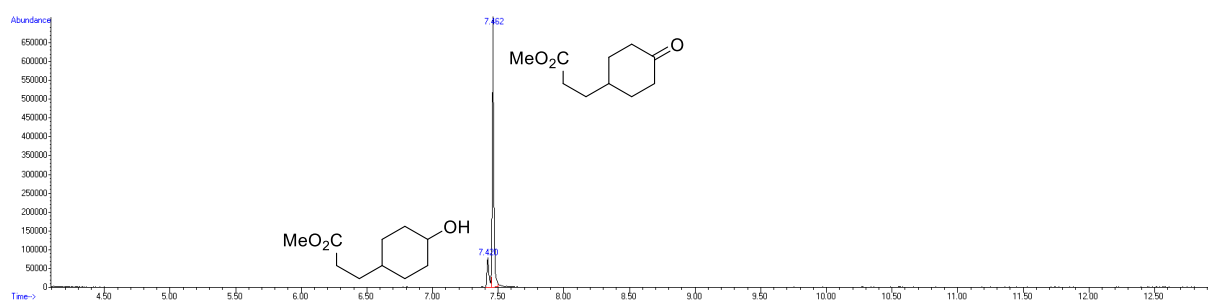

| peak # | R.T. min | first scan | max scan | last scan | PK TY | peak height | corr. area | corr. % max. | % of total |
|--------|----------|------------|----------|-----------|-------|-------------|------------|--------------|------------|
| 1      | 7.420    | 566        | 569      | 573       | M     | 79393       | 856369     | 16.76%       | 14.354%    |
| 2      | 7.462    | 573        | 576      | 582       | M     | 718200      | 5109867    | 100.00%      | 85.646%    |

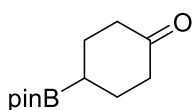

**4e**, yellow oil, procedure **C**: 2 mol% catalyst loading, 5 bar H<sub>2</sub>. Purification with 5% to 10% EtOAc in pentane. 73% yield.

<sup>1</sup>H NMR (300 MHz, CDCl<sub>3</sub>) δ 2.46 – 2.20 (m, 4H), 2.11 – 1.98 (m, 2H), 1.79 (m, 2H), 1.32 (tt, <sup>3</sup>J<sub>HH</sub> = 10.2, 3.9 Hz, 1H), 1.24 (s, 12H);

<sup>13</sup>C NMR (75 MHz, CDCl<sub>3</sub>) δ 212.7, 83.5, 42.4, 28.7, 24.9;

<sup>11</sup>B NMR (96 MHz, CDCl<sub>3</sub>) δ 33.5 (bs);

ESI-MS calculated [C<sub>12</sub>H<sub>21</sub>BO<sub>3</sub>+Na]<sup>+</sup>: 247.1478, found: 247.1494;

IR  $\tilde{\nu}$  = 2976, 2931, 1713, 1379, 1339, 1316, 1225, 1142, 980, 966, 853, 772, 669.

GC-MS spectrum of the crude reaction mixture for product **4e**:

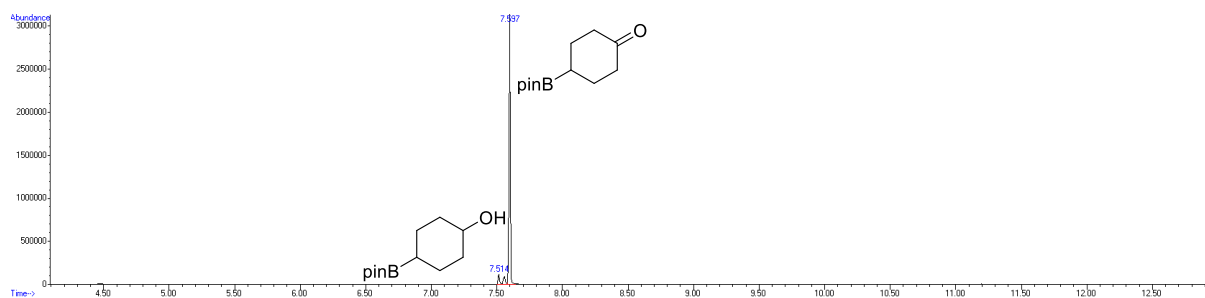

| peak # | R.T. min | first scan | max scan | last scan | PK TY | peak height | corr. area | corr. % max. | % of total |
|--------|----------|------------|----------|-----------|-------|-------------|------------|--------------|------------|
| 1      | 7.514    | 582        | 585      | 596       | M2    | 122039      | 1709327    | 7.86%        | 7.289%     |
| 2      | 7.597    | 596        | 599      | 606       | M     | 3135609     | 21742202   | 100.00%      | 92.711%    |

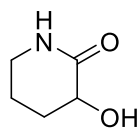

**4f**, yellow oil, procedure **C**: 2 mol% catalyst loading, 5 bar H<sub>2</sub>. Purification with 1% to 5% MeOH in CH<sub>2</sub>Cl<sub>2</sub>. 69% yield.

<sup>1</sup>H NMR (500 MHz, Methanol-*d*<sub>4</sub>) δ 4.05 (dd, *J* = 9.5, 5.8 Hz, 1H), 3.33 – 3.24 (m, 2H), 2.21 – 2.13 (m, 1H), 2.00 – 1.92 (m, 1H), 1.90 – 1.80 (m, 1H), 1.80 – 1.71 (m, 1H);

<sup>13</sup>C NMR (126 MHz, Methanol-*d*<sub>4</sub>) δ 175.6, 68.7, 42.9, 30.5, 21.1;

ESI-MS calculated [C<sub>5</sub>H<sub>9</sub>NO<sub>2</sub>+Na]<sup>+</sup>: 138.1212, found: 138.0511;

IR  $\tilde{\nu}$  = 3251, 2955, 1653, 1559, 1457, 1374, 1288, 1091, 901, 827, 750;

Analytical data are in good accordance with those previously reported for this compound.<sup>14</sup>

## 7. Application

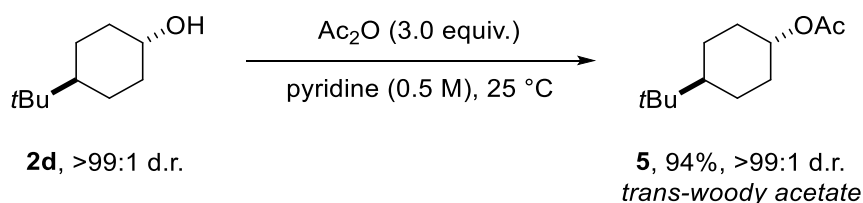

Acetic anhydride (85  $\mu$ L, 0.9 mmol, 3.0 equiv.) was added to a solution of *trans*-4-*tert*-butylcyclohexanol (47 mg, 0.3 mmol, 1.0 equiv.) in pyridine (0.6 mL, 0.5 M) and stirred for 16 h at room temperature. After addition of water, the mixture was extracted with Et<sub>2</sub>O (3 x 5 mL) and dried over magnesium sulfate. The crude product was purified by column chromatography on silica gel (5% Et<sub>2</sub>O in *n*-pentane) to provide **5** as a colorless oil (56 mg, 0.28 mmol, 94%).

**<sup>1</sup>H NMR** (300 MHz, CDCl<sub>3</sub>)  $\delta$  4.75 – 4.48 (m, 1H), 2.08 – 1.95 (m, 4H), 1.87 – 1.73 (m, 2H), 1.37 – 1.21 (m, 3H), 1.18 – 0.96 (m, 3H), 0.84 (s, 9H);

**<sup>13</sup>C NMR** (75 MHz, CDCl<sub>3</sub>)  $\delta$  170.9, 73.9, 47.2, 32.5, 32.2, 27.7, 25.6, 21.6;

**ESI-MS** calculated [C<sub>12</sub>H<sub>22</sub>O<sub>2</sub>+Na]<sup>+</sup>: 221.1512, found: 221.1511;

**IR**  $\tilde{\nu}$  = 2946, 2864, 1735, 1468, 1452, 1367, 1240, 1046, 1027, 971, 904, 894.

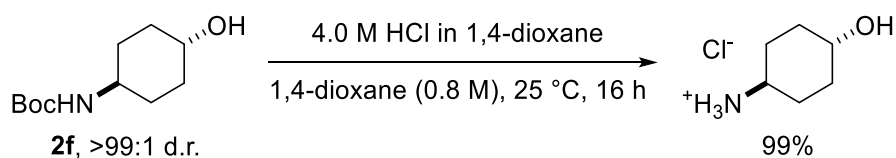

4.0 M HCl in 1,4-dioxane (2.6 mL, 10.5 mmol, 10.0 equiv.) was added to a solution of *trans*-4-Boc-aminocyclohexanol (226 mg, 1.05 mmol, 1.0 equiv.) in 1,4-dioxane (1.3 mL, 0.8 M). The mixture was stirred for 16 h at room temperature and the solvent was evaporated. The product was obtained as a white solid (160 mg, 1.05 mmol, 99%).

**<sup>1</sup>H NMR** (400 MHz, Methanol-*d*<sub>4</sub>)  $\delta$  3.62 – 3.49 (m, 1H), 3.07 (t, *J* = 11.2 Hz, 1H), 2.03 (t, *J* = 10.5 Hz, 4H), 1.56 – 1.25 (m, 4H);

**<sup>13</sup>C NMR** (101 MHz, Methanol-*d*<sub>4</sub>)  $\delta$  69.5, 50.7, 33.8, 29.9;

**ESI-MS** calculated [C<sub>6</sub>H<sub>14</sub>NO+H]<sup>+</sup>: 116.1070, found: 116.1068;

**IR**  $\tilde{\nu}$  = 3250, 2932, 2898, 2854, 1683, 1630, 1613, 1537, 1460, 1391, 1365, 1162, 1071, 1050, 947, 899.

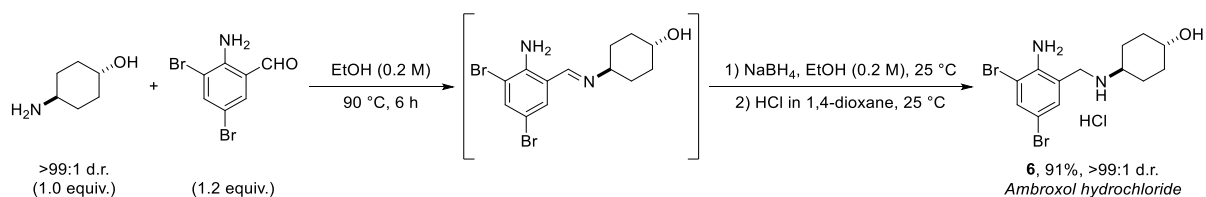

The synthesis was conducted according to a modified literature procedure.<sup>15</sup> A mixture of *trans*-4-aminocyclohexanol (115 mg, 1.0 mmol, 1.0 equiv.) and 2-amino-3,5-dibromobenzaldehyde (335 mg, 1.2 mmol, 1.0 equiv.) in ethanol (5.0 mL, 0.2 M) was heated to 90 °C for 6 h. After cooling to room temperature, NaBH<sub>4</sub> (91 mg, 2.4 mmol, 2.4 equiv.) was added and the mixture was stirred at room temperature for 17 h. Saturated, aqueous NH<sub>4</sub>Cl solution was added to quench the reaction. The mixture was basified with saturated, aqueous K<sub>2</sub>CO<sub>3</sub> solution and extracted with EtOAc (3 x 30 mL). The combined extracts were dried over magnesium sulfate and the crude product was purified by silica gel chromatography (5% MeOH in CH<sub>2</sub>Cl<sub>2</sub>). The product was dissolved in methanol and treated with 4M HCl in 1,4-dioxane. After evaporation of the solvent, Ambroxol hydrochloride **6** was obtained as a white solid (379 mg, 0.91 mmol, 91%).

**<sup>1</sup>H NMR** (400 MHz, Methanol-*d*<sub>4</sub>) δ 7.64 (d, *J* = 2.2 Hz, 1H), 7.46 (d, *J* = 2.2 Hz, 1H), 4.24 (s, 2H), 3.63 – 3.52 (m, 1H), 3.22 (tt, *J* = 11.7, 3.8 Hz, 1H), 2.24 (d, *J* = 12.4 Hz, 2H), 2.07 (d, *J* = 11.0 Hz, 2H), 1.62 – 1.47 (m, 2H), 1.43 – 1.27 (m, 2H);

**<sup>13</sup>C NMR** (101 MHz, Methanol-*d*<sub>4</sub>) δ 144.8, 136.8, 134.4, 120.0, 112.0, 109.5, 69.6, 58.4, 46.2, 33.9, 28.2;

**ESI-MS** calculated [C<sub>13</sub>H<sub>19</sub>Br<sub>2</sub>N<sub>2</sub>O+H]<sup>+</sup>: 376.9859, found: 378.9835;

**IR**  $\tilde{\nu}$  = 3192, 2919, 2914, 2853, 2699, 2685, 1630, 1584, 1458, 1413, 1286, 1062, 896, 865.



## 8. X-ray Diffraction Data

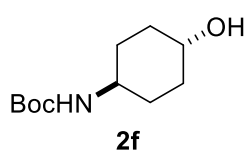

X-ray crystal structure analysis of **2f**: A colorless plate-like specimen of  $C_{11}H_{21}NO_3$ , approximate dimensions 0.052 mm x 0.069 mm x 0.120 mm, was used for the X-ray crystallographic analysis. The X-ray intensity data were measured. A total of 2140 frames were collected. The total exposure time was 24.99 hours. The frames were integrated with the Bruker SAINT software package using a narrow-frame algorithm. The integration of the data using an orthorhombic unit cell yielded a total of 33803 reflections to a maximum  $\theta$  angle of  $69.27^\circ$  (0.82 Å resolution), of which 4551 were independent (average redundancy 7.428, completeness = 99.7%,  $R_{int} = 7.66\%$ ,  $R_{sig} = 4.69\%$ ) and 4145 (91.08%) were greater than  $2\sigma(F^2)$ . The final cell constants of  $a = 9.8601(3)$  Å,  $b = 5.6544(2)$  Å,  $c = 44.1243(15)$  Å, volume =  $2460.06(14)$  Å<sup>3</sup>, are based upon the refinement of the XYZ-centroids of 9942 reflections above  $20 \sigma(I)$  with  $8.015^\circ < 2\theta < 138.3^\circ$ . Data were corrected for absorption effects using the multi-scan method (SADABS). The ratio of minimum to maximum apparent transmission was 0.792. The calculated minimum and maximum transmission coefficients (based on crystal size) are 0.9230 and 0.9660. The structure was solved and refined using the Bruker SHELXTL Software Package, using the space group  $Pca2_1$ , with  $Z = 8$  for the formula unit,  $C_{11}H_{21}NO_3$ . The final anisotropic full-matrix least-squares refinement on  $F^2$  with 290 variables converged at  $R1 = 5.72\%$ , for the observed data and  $wR2 = 13.08\%$  for all data. The goodness-of-fit was 1.094. The largest peak in the final difference electron density synthesis was  $0.226 e^-/\text{Å}^3$  and the largest hole was  $-0.215 e^-/\text{Å}^3$  with an RMS deviation of  $0.053 e^-/\text{Å}^3$ . On the basis of the final model, the calculated density was  $1.163 \text{ g/cm}^3$  and  $F(000)$ , 944  $e^-$ . The hydrogens at O1A, O1B, N1A and N1B atoms were refined freely, but with distance restraints (SADI, DFIX, U-fixed value). CCDC Nr.: 2004851.

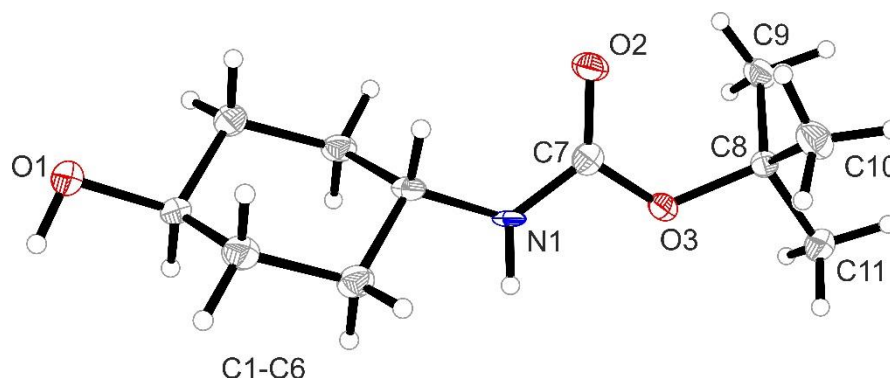

**Figure S1.** Crystal structure of compound **2f**. Thermal ellipsoids are shown at 30% probability.

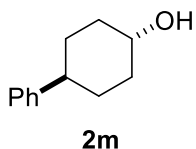

X-ray crystal structure analysis of **2m**: A colorless plate-like specimen of  $C_{12}H_{16}O$ , approximate dimensions 0.035 mm x 0.136 mm x 0.164 mm, was used for the X-ray crystallographic analysis. The X-ray intensity data were measured. A total of 1243 frames were collected. The total exposure time was 22.04 hours. The frames were integrated with the Bruker SAINT software package using a wide-frame algorithm. The integration of the data using a monoclinic unit cell yielded a total of 10527 reflections to a maximum  $\theta$  angle of  $68.73^\circ$  ( $0.83 \text{ \AA}$  resolution), of which 1794 were independent (average redundancy 5.868, completeness = 99.6%,  $R_{\text{int}} = 3.26\%$ ,  $R_{\text{sig}} = 2.44\%$ ) and 1589 (88.57%) were greater than  $2\sigma(F^2)$ . The final cell constants of  $a = 14.6389(3) \text{ \AA}$ ,  $b = 5.30300(10) \text{ \AA}$ ,  $c = 13.1361(3) \text{ \AA}$ ,  $\beta = 106.9940(10)^\circ$ , volume =  $975.23(4) \text{ \AA}^3$ , are based upon the refinement of the XYZ-centroids of 5882 reflections above  $20 \sigma(I)$  with  $6.313^\circ < 2\theta < 137.4^\circ$ . Data were corrected for absorption effects using the multi-scan method (SADABS). The ratio of minimum to maximum apparent transmission was 0.895. The calculated minimum and maximum transmission coefficients (based on crystal size) are 0.9120 and 0.9800. The structure was solved and refined using the Bruker SHELXTL Software Package, using the space group  $P2_1/c$ , with  $Z = 4$  for the formula unit,  $C_{12}H_{16}O$ . The final anisotropic full-matrix least-squares refinement on  $F^2$  with 122 variables converged at  $R1 = 3.41\%$ , for the observed data and  $wR2 = 8.67\%$  for all data. The goodness-of-fit was 1.049. The largest peak in the final difference electron density synthesis was  $0.197 \text{ e}^-/\text{\AA}^3$  and the largest hole was  $-0.197 \text{ e}^-/\text{\AA}^3$  with an RMS deviation of  $0.032 \text{ e}^-/\text{\AA}^3$ . On the basis of the final model, the calculated density was  $1.200 \text{ g/cm}^3$  and  $F(000)$ , 384  $e^-$ . The hydrogen at O1 atom was refined freely. CCDC Nr.: 2004853.

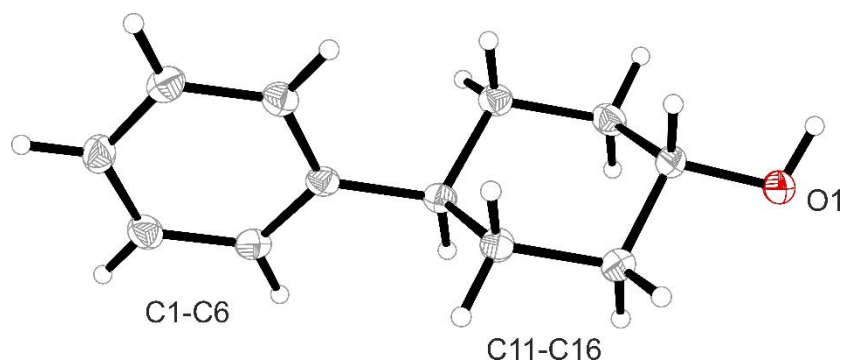

**Figure S2.** Crystal structure of compound **2m**. Thermal ellipsoids are shown at 50% probability.

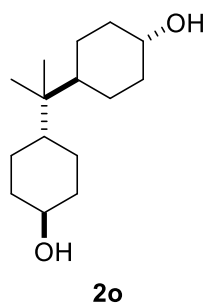

X-ray crystal structure analysis of **2o**: A colorless plate-like specimen of  $C_{15}H_{28}O_2$ , approximate dimensions 0.056 mm x 0.148 mm x 0.152 mm, was used for the X-ray crystallographic analysis. The X-ray intensity data were measured. A total of 601 frames were collected. The total exposure time was 8.35 hours. The frames were integrated with the Bruker SAINT software package using a wide-frame algorithm. The integration of the data using a

monoclinic unit cell yielded a total of 15292 reflections to a maximum  $\theta$  angle of  $66.87^\circ$  (0.84 Å resolution), of which 2523 were independent (average redundancy 6.061, completeness = 99.1%,  $R_{\text{int}} = 6.24\%$ ,  $R_{\text{sig}} = 4.68\%$ ) and 2197 (87.08%) were greater than  $2\sigma(F^2)$ . The final cell constants of  $a = 9.1475(2)$  Å,  $b = 19.6782(5)$  Å,  $c = 7.9541(2)$  Å,  $\beta = 92.1100(10)^\circ$ , volume =  $1430.82(6)$  Å<sup>3</sup>, are based upon the refinement of the XYZ-centroids of 8274 reflections above  $20 \sigma(I)$  with  $8.987^\circ < 2\theta < 133.6^\circ$ . Data were corrected for absorption effects using the multi-scan method (SADABS). The ratio of minimum to maximum apparent transmission was 0.776. The calculated minimum and maximum transmission coefficients (based on crystal size) are 0.9210 and 0.9700. The structure was solved and refined using the Bruker SHELXTL Software Package, using the space group  $P2_1/c$ , with  $Z = 4$  for the formula unit,  $C_{15}H_{28}O_2$ . The final anisotropic full-matrix least-squares refinement on  $F^2$  with 165 variables converged at  $R1 = 7.29\%$ , for the observed data and  $wR2 = 20.31\%$  for all data. The goodness-of-fit was 1.122. The largest peak in the final difference electron density synthesis was  $0.391 \text{ e}^-/\text{Å}^3$  and the largest hole was  $-0.403 \text{ e}^-/\text{Å}^3$  with an RMS deviation of  $0.112 \text{ e}^-/\text{Å}^3$ . On the basis of the final model, the calculated density was  $1.116 \text{ g/cm}^3$  and  $F(000)$ , 536  $e^-$ . The hydrogens at O1 and O2 atoms were refined freely. CCDC Nr.: 2004854.

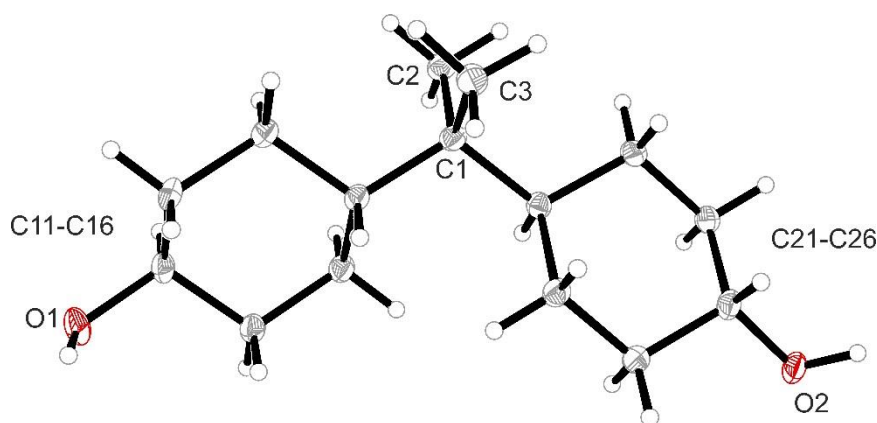

**Figure S3.** Crystal structure of compound **2o**. Thermal ellipsoids are shown at 50% probability.

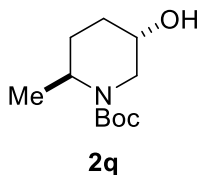

X-ray crystal structure analysis of **2q**: A colorless plate-like specimen of  $C_{11}H_{21}NO_3$ , approximate dimensions 0.075 mm x 0.079 mm x 0.158 mm, was used for the X-ray crystallographic analysis. The X-ray intensity data were measured. A total of 2380 frames were collected. The total exposure time was 48.50 hours. The frames were integrated with the Bruker SAINT software package using a wide-frame algorithm. The integration of the data using an orthorhombic unit cell yielded a total of 65017 reflections to a maximum  $\theta$  angle of  $66.59^\circ$  (0.84 Å resolution), of which 2113 were independent (average redundancy 30.770, completeness = 99.8%,  $R_{\text{int}} = 10.21\%$ ,  $R_{\text{sig}} = 2.93\%$ ) and 1684 (79.70%) were greater than  $2\sigma(F^2)$ . The final cell constants of  $a = 9.2362(3)$  Å,  $b = 10.9879(3)$  Å,  $c = 23.7378(7)$  Å, volume = 2409.06(12) Å<sup>3</sup>, are based upon the refinement of the XYZ-centroids of 9865 reflections above  $20\sigma(I)$  with  $7.448^\circ < 2\theta < 134.4^\circ$ . Data were corrected for absorption effects using the multi-scan method (SADABS). The ratio of minimum to maximum apparent transmission was 0.856. The calculated minimum and maximum transmission coefficients (based on crystal size) are 0.8980 and 0.9500. The structure was solved and refined using the Bruker SHELXTL Software Package, using the space group *Pbca*, with  $Z = 8$  for the formula unit,  $C_{11}H_{21}NO_3$ . The final anisotropic full-matrix least-squares refinement on  $F^2$  with 141 variables converged at  $R1 = 5.90\%$ , for the observed data and  $wR2 = 15.49\%$  for all data. The goodness-of-fit was 1.071. The largest peak in the final difference electron density synthesis was  $0.317\text{ e}^-/\text{Å}^3$  and the largest hole was  $-0.219\text{ e}^-/\text{Å}^3$  with an RMS deviation of  $0.045\text{ e}^-/\text{Å}^3$ . On the basis of the final model, the calculated density was  $1.187\text{ g/cm}^3$  and  $F(000)$ , 944  $e^-$ . CCDC Nr.: 2004852.

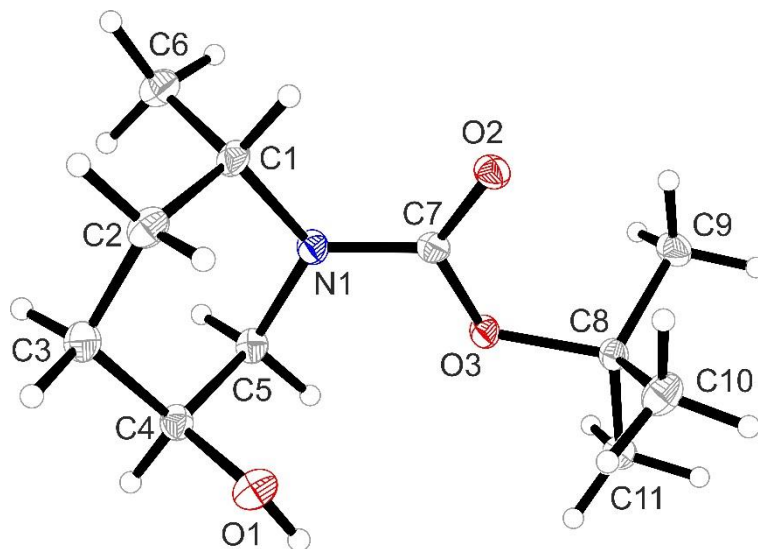

**Figure S4.** Crystal structure of compound **2q**. Thermal ellipsoids are shown at 15% probability.

## 9. Mechanistic Studies

### 9.1 Deuteration Experiments

The deuteration was conducted according to general procedure A for the *trans*-selective hydrogenation of phenols using deuterium gas instead of hydrogen gas. The major *trans*-isomer was isolated by column chromatography on silica gel and analyzed by  $^1\text{H}$  and  $^2\text{H}$  NMR spectroscopy.

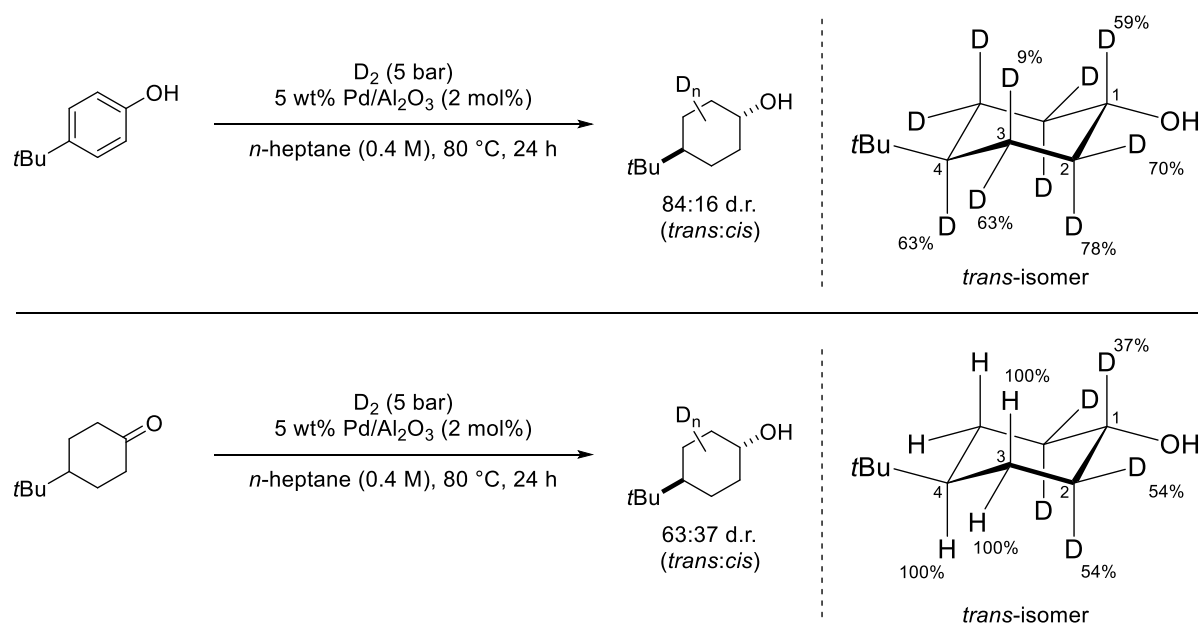

**Scheme S1.** Deuteration of *p*-*t*Bu-phenol and 4-*t*Bu-cyclohexanone under standard conditions for the *trans*-selective hydrogenation of phenols. d.r. values determined by GC-MS analysis. All experiments conducted on 0.4 mmol scale.

Deuteration of *p*-*t*Bu-phenol revealed a *syn*-addition of D<sub>2</sub> at the 3- and 4-position (low deuterium incorporation at the axial position at carbon 3). Additionally, deuterium scrambling at the 2-position was observed, which can be rationalized due to the formation of keto-enol intermediates.

To test this hypothesis, we conducted the deuteration of 4-*t*Bu-cyclohexanone under identical conditions. Scrambling of deuterium at the 2-position supports the formation of enol intermediates in the deuteration of ketones and phenols.

## 9.2 Reaction Profile

The hydrogenation was conducted on a 0.4 mmol scale according to general procedure A for the *trans*-selective hydrogenation of phenols using 1 mol% catalyst loading (8.5 mg, 0.004 mmol, 1 mol%). The stirring was stopped after the indicated time and the hydrogen gas was released after a 30 min cool-down period of the autoclave to avoid boiling of the solvent.

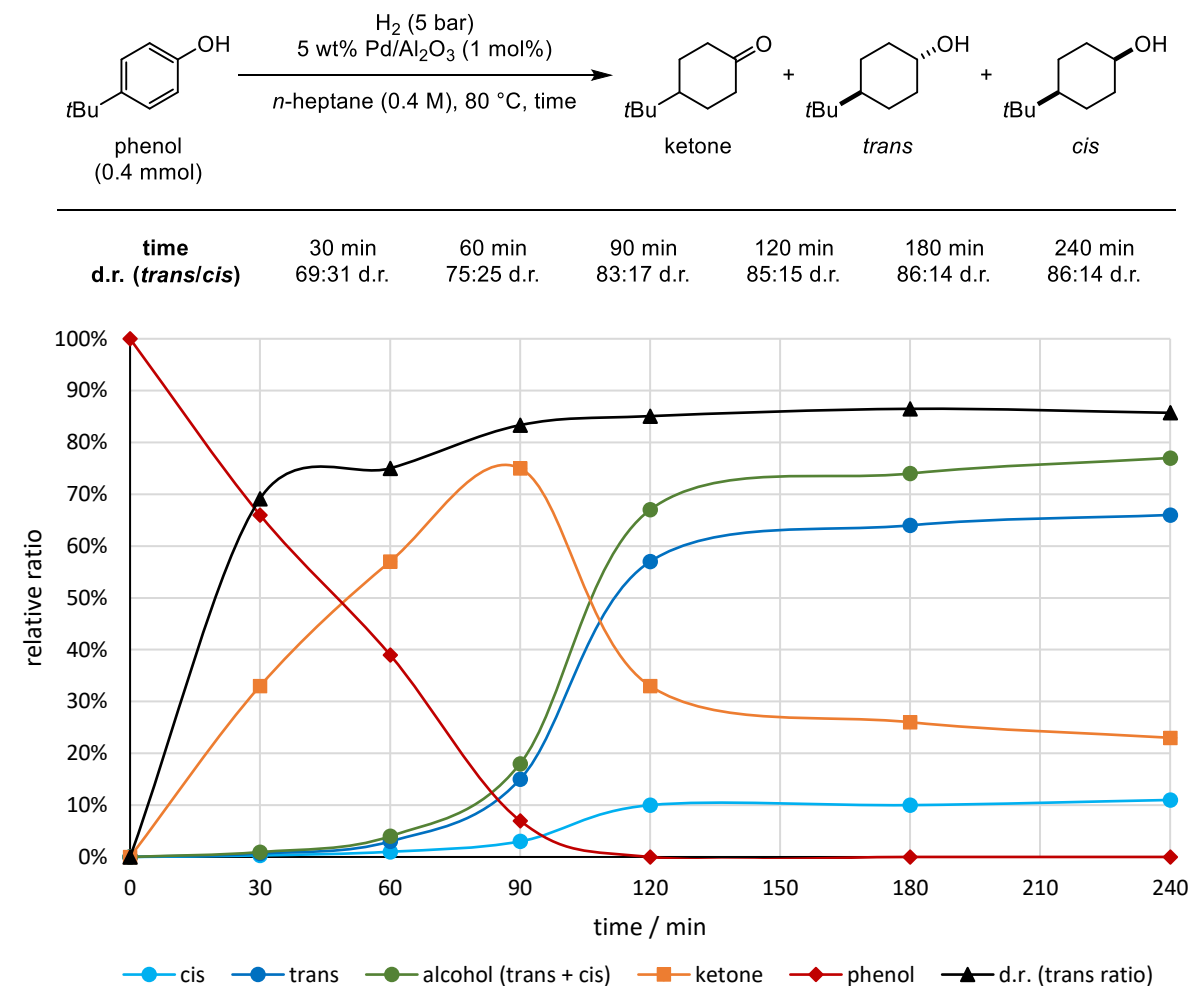

**Figure S5.** Reaction profile for the first 4 h of the hydrogenation of *p*-*t*Bu-phenol. Relative ratios and d.r. values determined by GC-MS analysis.

The starting material (*p*-*t*Bu-phenol) is quickly converted into the corresponding cyclohexanone and completely consumed after 120 min. With the consumption of the phenol the corresponding cyclohexanone reaches a maximum after around 90 min and is slowly consumed after 120 min (the effective concentration of cyclohexanone might be lower, since the corresponding enol form (unstable and short-lived) could not be detected by GC-MS and  $^1\text{H}$  NMR analysis). The formation of the cyclohexanols is slow within the first 60 min of the reaction. With increasing concentration of the cyclohexanone, the formation of the alcohols increases. In the beginning of the reaction, the *cis*-isomer is formed faster compared to the later course of the reaction (30 min/69:31 d.r. and 60 min/75:25 d.r.). This can be rationalized with

a fast, continuous all-*syn*-addition of hydrogen to the aromatic phenol until the phenol is consumed. After consumption of the phenol, the *trans*-isomer can be formed *via* keto-enol formation (see deuteration experiments), combined with desorption and re-adsorption to the catalyst surface. The rate of hydrogenation for cyclohexanone to cyclohexanols is relatively low.

To test which double bond (enol or olefin) is hydrogenated faster, a competition experiment was conducted. To mimic the steric influence as good as possible, a trisubstituted alkene double bond, since enols are inherently trisubstituted, within a disubstituted cyclohexane derivative, was chosen as the model substrate (Scheme S2).

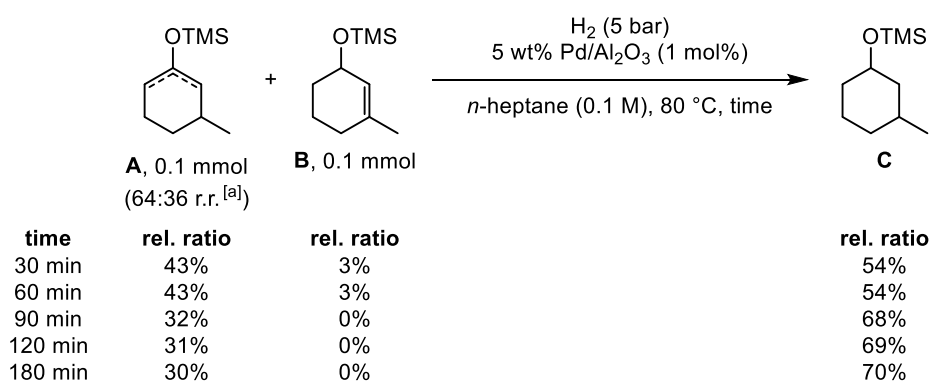

**Scheme S2.** Competitive hydrogenation of enol and alkene double bonds. The relative ratios were determined by  $^1\text{H}$  NMR analysis of the crude reaction mixture. <sup>[a]</sup>Regiomeric ratio of the silyl enol ether was determined by  $^1\text{H}$  NMR analysis.

A 1:1 ratio of substrates **A** and **B** was submitted to hydrogenation conditions and the crude reaction mixture was analyzed by  $^1\text{H}$  NMR. Substrate **B**, bearing an alkene double bond, was almost completely hydrogenated after 30 min, whereas silyl enol ether **A** was hydrogenated with a significantly lower rate. Although the introduction of a TMS group to form a stable enol species is a manipulation of the substrate, it demonstrates, that the alkene double bond is hydrogenated at a significant higher rate.

The absence of olefins and enones as intermediates in the *trans*-selective hydrogenation of phenols can be explained by the fast hydrogenation of alkene double bonds under the employed conditions.

### 9.3 Hydrogenation of Intermediates

Enone intermediates **IM-1** and **IM-4** were synthesized by palladium-catalyzed dehydrogenative oxidation of 4-*t*Bu-cyclohexanone following a literature procedure.<sup>16</sup> **IM-2** was synthesized by a modified Birch reduction,<sup>17</sup> starting from *p*-*t*Bu-anisole, and subsequent acid-catalyzed hydrolysis of the corresponding methyl enol ether.<sup>18</sup> Silyl enol ether **IM-3** was synthesized according to a literature procedure.<sup>19</sup>

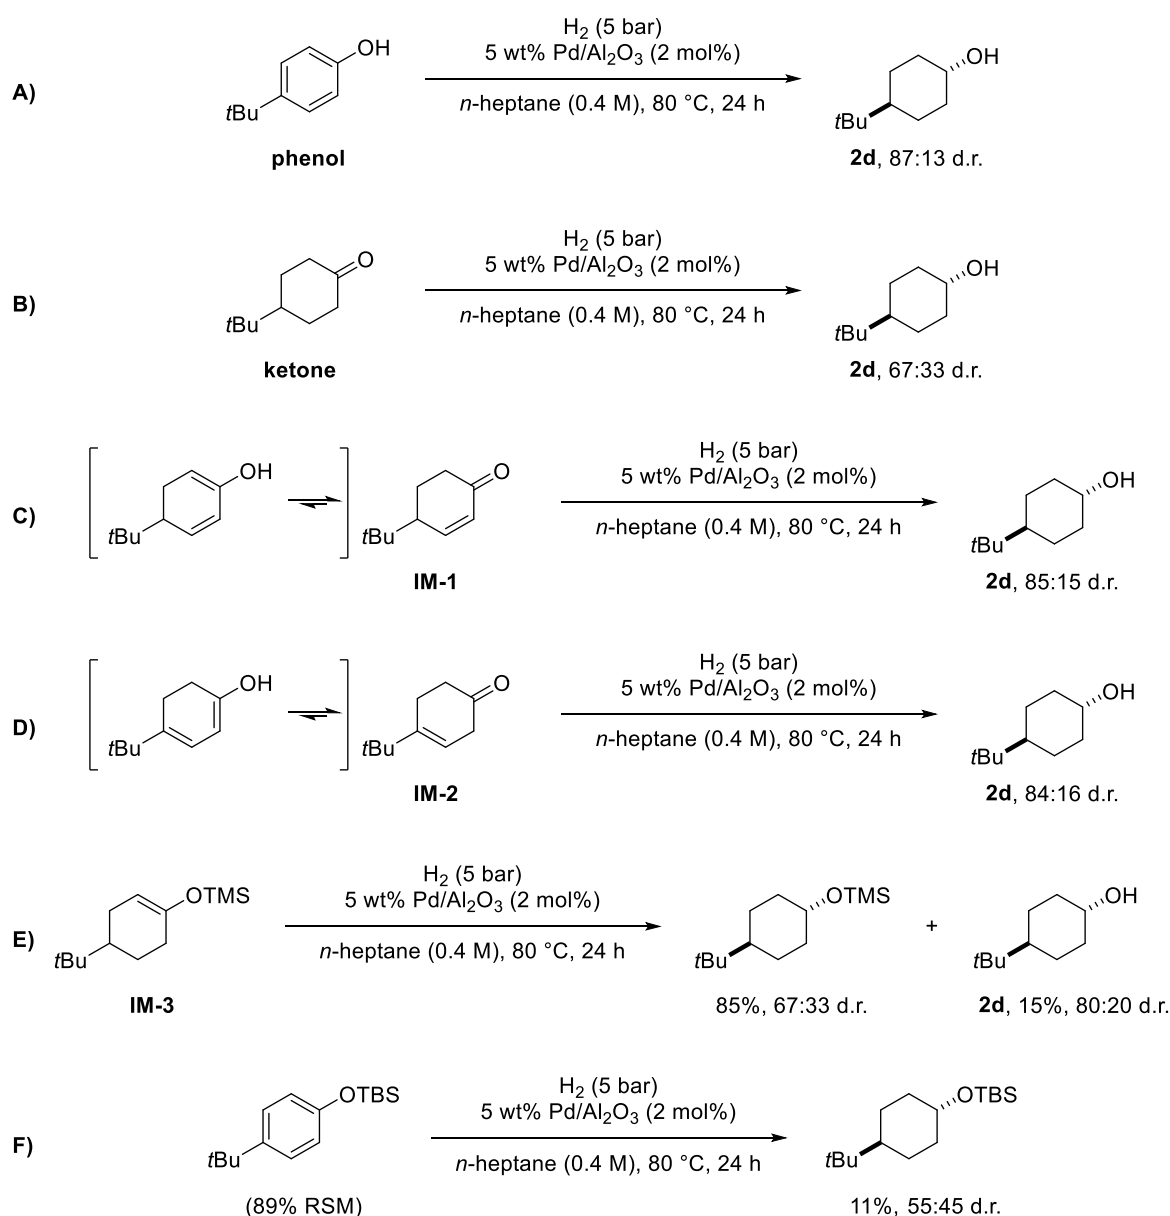

**Scheme S3.** Mechanistic experiments for the *trans*-selective hydrogenation of *p*-*t*Bu-phenol derivatives. Relative ratios and d.r. values determined by GC-MS analysis. All experiments conducted on 0.4 mmol scale.

A) *trans*-Selective hydrogenation under standard conditions (general procedure A).



- B) Hydrogenation of 4-*t*Bu-cyclohexanone under standard conditions: decrease in *trans*-selectivity → cyclohexanone not key intermediate for high *trans*-selectivity.
- C) Hydrogenation of 4-*t*Bu-cyclohexenone **IM-1** under standard conditions: very low decrease in *trans*-selectivity → enone **IM-1** (“diene”) possibly reaction intermediate in the *trans*-selective hydrogenation of phenols.
- D) Hydrogenation of 4-*t*Bu-cyclohex-3-en-1-one **IM-2** under standard conditions: very low decrease in *trans*-selectivity → **IM-2** (“diene”) possibly reaction intermediate in the *trans*-selective hydrogenation of phenols.
- E) Hydrogenation of silyl enol ether **IM-3** under standard conditions: decrease in *trans*-selectivity → **IM-3** (“enol”) provides *trans*-isomer as the major product, however the effect of the TMS group (“locked enol”) is not negligible. Unprotected hydroxy group necessary for high *trans*-selectivity. Additionally, cleavage of the silyl ether was observed.
- F) Hydrogenation of TBS-protected *p*-*t*Bu-phenol: low reactivity of non-phenolic arenes under palladium-catalyzed standard conditions (89% remaining starting material).

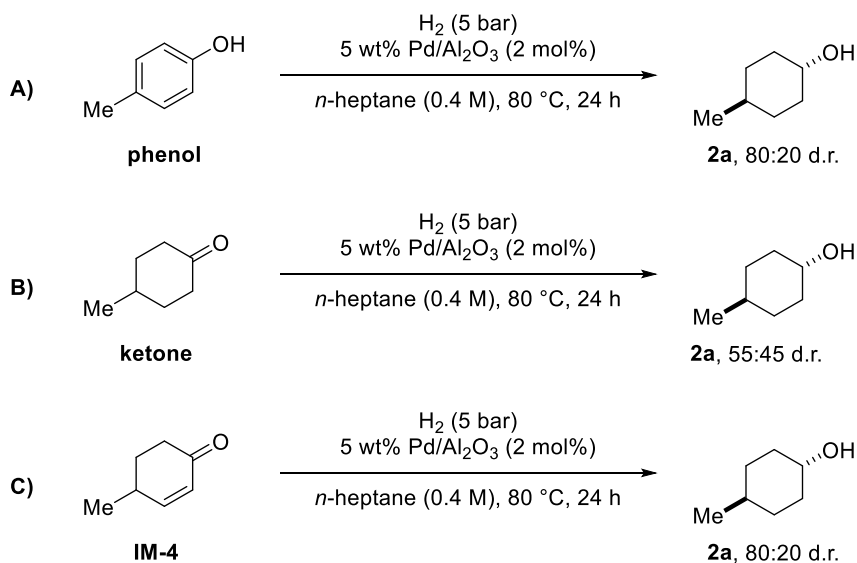

**Scheme S4.** Mechanistic experiments for the *trans*-selective hydrogenation of *p*-cresol derivatives. d.r. values determined by  $^1\text{H}$  NMR analysis. All experiments conducted on 0.4 mmol scale.

- A) *trans*-Selective hydrogenation under standard conditions (general procedure A).
- B) Hydrogenation of 4-Me-cyclohexanone under standard conditions: significant decrease in *trans*-selectivity → cyclohexanone not key intermediate for high *trans*-selectivity.
- C) Hydrogenation of 4-Me-cyclohexenone **IM-4** under standard conditions: retention of *trans*-selectivity → enone **IM-4** (“diene”) possibly reaction intermediate in the *trans*-selective hydrogenation of phenols.

Comparison of the diastereoselectivity in the direct hydrogenation of 4-*t*Bu-cyclohexanone (67:33 d.r., Scheme S3, B) and 4-Me-cyclohexanone (55:45 d.r., Scheme S4, B) reveals, that the existing stereocenter has an influence on the desorption and re-adsorption on the surface. Sterically more demanding substituents in the 4-position favor the process of desorption and have a beneficial influence on the *trans*-selectivity.

This trend can also be seen by comparison of the diastereoselectivity in the *trans*-selective hydrogenation of phenols (manuscript Scheme 2, substrates **2a-e**). With increasing steric bulk in *para*-position, the diastereomeric ratio increases.

## 9.4 Isomerization Experiments

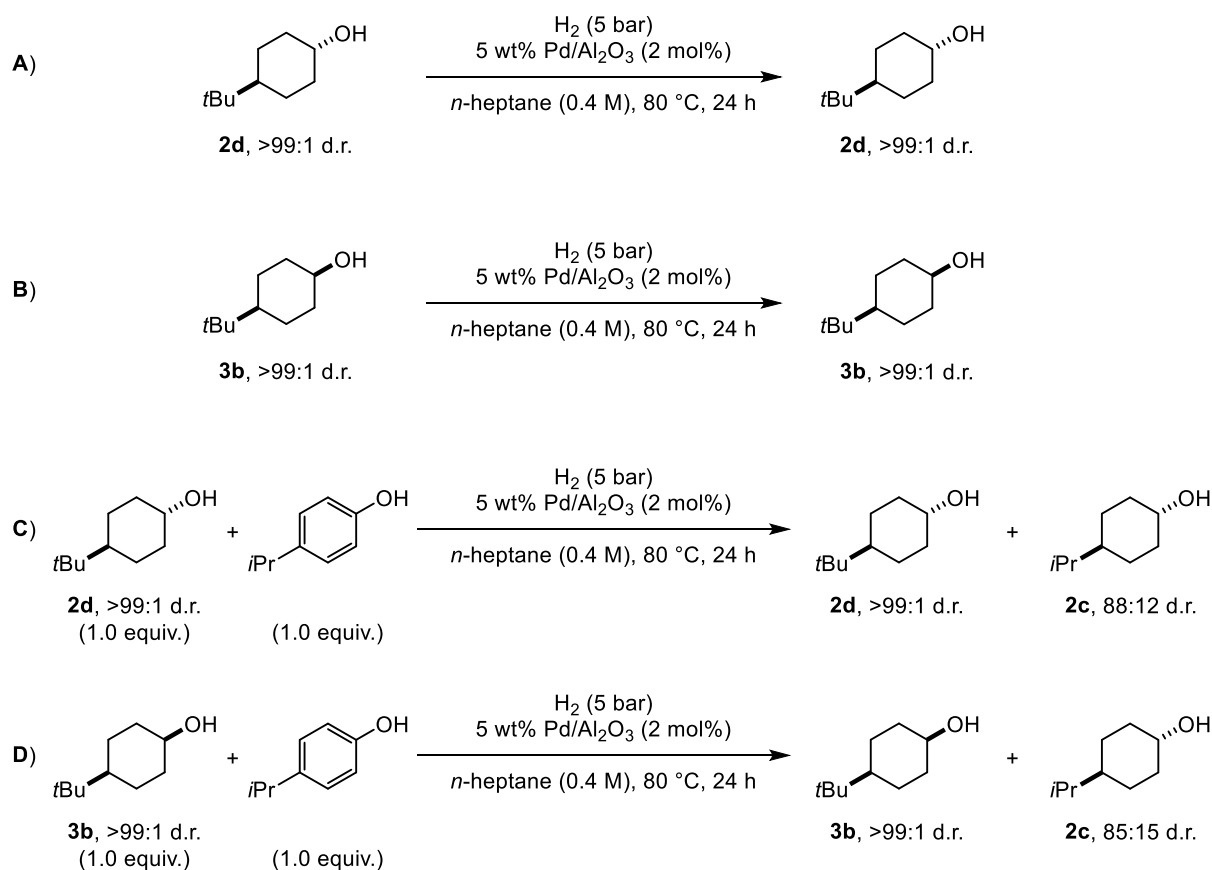

**Scheme S5.** Isomerization experiments with *trans*- and *cis*-4-*t*Bu-cyclohexanol. d.r. values determined by GC-MS analysis. All experiments conducted on 0.4 mmol scale.

- A) Hydrogenation of diastereomerically pure *trans*-4-*t*Bu-cyclohexanol under standard conditions: no isomerization under reaction conditions → d.r. not driven by equilibrium.
- B) Hydrogenation of diastereomerically pure *cis*-4-*t*Bu-cyclohexanol under standard conditions: no isomerization under reaction conditions → d.r. not driven by equilibrium.
- C) Hydrogenation of diastereomerically pure *trans*-4-*t*Bu-cyclohexanol in the presence of *p*-*i*Pr-phenol under standard conditions: no isomerization under reaction conditions for successful *trans*-selective phenol hydrogenation.
- D) Hydrogenation of diastereomerically pure *cis*-4-*t*Bu-cyclohexanol in the presence of *p*-*i*Pr-phenol under standard conditions: no isomerization under reaction conditions for successful *trans*-selective phenol hydrogenation.

## 9.5 Mechanistic Summary

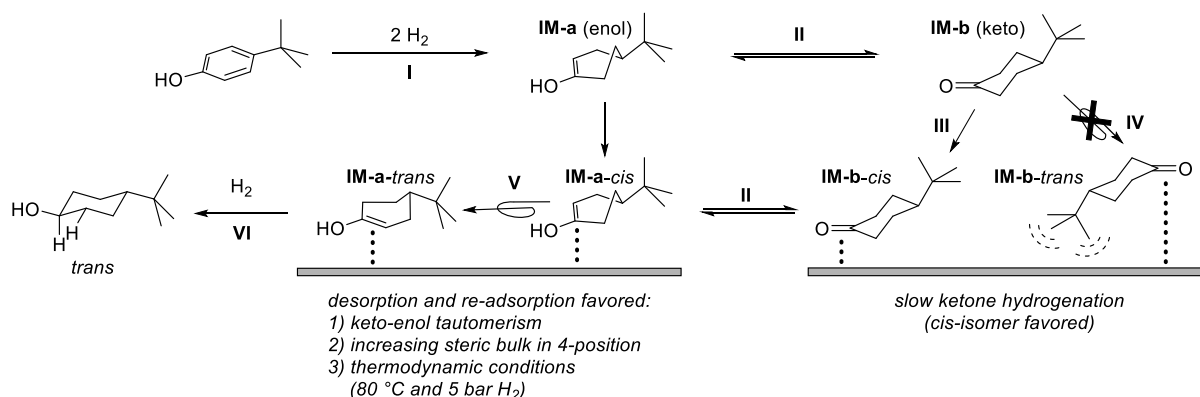

**Figure S6.** Tentative schematic representation of the mechanism for the *trans*-selective hydrogenation of *p*-*t*Bu-phenol catalyzed by Pd/Al<sub>2</sub>O<sub>3</sub>.

*p*-*t*Bu-phenol is quickly converted into the corresponding cyclohexanone (**I**). With consumption of the phenol the cyclohexanone concentration increases. The cyclohexanone is in equilibrium with the corresponding enol intermediate (**II**, shown by deuterium scrambling, chapter 9.1). With increasing concentration of the cyclohexanone, the formation of cyclohexanols starts. The direct hydrogenation of the ketone intermediate **IM-b** is relatively slow (chapter 9.2). The *cis*-cyclohexanol could be formed by slow, direct ketone hydrogenation of **IM-b-cis** (**III**) or fast, continuous phenol hydrogenation (all-*syn* H<sub>2</sub>-addition). The direct formation of the *trans*-cyclohexanol, starting from the ketone, is disfavored because of steric interactions (**IV**). Therefore, the favored reaction pathway for the formation of the *trans*-isomer is the hydrogenation of diene and enol intermediate **IM-a**, which can be formed by keto-enol tautomerism on the catalyst surface (**II**). **IM-a-trans** is formed by the desorption of **IM-a-cis** and re-adsorption as **IM-a-trans** (**V**). The process of desorption and re-adsorption could be facilitated *via* the formation of the more stable ketone intermediate **IM-b** (**II**). In addition, the process is favored with increasing steric bulk in the 4-position and by the high reaction temperatures. Finally, *syn*-addition of hydrogen to **IM-a-trans** provides the desired *trans*-cyclohexanol (**VI**).

Key to the high *trans*-selectivity in the hydrogenation of *p*-*t*Bu-phenol (87:13 d.r.) compared to the direct hydrogenation of 4-*t*Bu-cyclohexanone (67:33 d.r.) could be the low concentration of the cyclohexanone intermediate. The effective concentration of cyclohexanone might be even lower, since the unstable and short-lived diene and enol intermediates could not be detected with our analytical tools. The low cyclohexanone concentration disfavors the direct ketone hydrogenation, which would lead to the *cis*-isomer, and favors the tautomerization, as well as desorption and re-adsorption, leading to an increased *trans* ratio.

## 10. Reaction-Condition Based Sensitivity Assessment

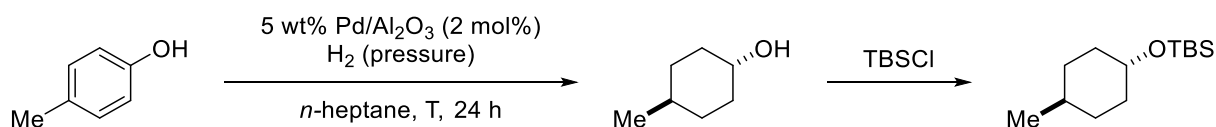

The sensitivity assessment of general procedure A was conducted by following a modified procedure from Glorius and coworkers.<sup>20</sup> A description of the experiments included in the assessment is given in Table S9. Each reaction was prepared separately. Volume changes due to solvation of starting materials were neglected. All reactions were run in a suitable autoclave and stopped after 24 h. After the autoclave was carefully depressurized, the crude mixture was diluted with CH<sub>2</sub>Cl<sub>2</sub> (1.0 mL) and imidazole (2.5 equiv.), DMPA (0.2 equiv.) and TBSCl (2.0 equiv.) were added. The mixture was stirred at 40 °C for 16 h. Mesitylene was added as an internal standard and yield and diastereomeric ratio were determined by GC-FID analysis. The deviation from the yield of the ‘standard’ experiment was calculated for each experiment (Table S10). The deviation values are plotted in a radar diagram.

Standard conditions: *n* = 0.1 mmol, *c* = 0.1 M, *V* = 1.0 mL, *T* = 80 °C, *p*(H<sub>2</sub>) = 5 bar.

**Table S9.** Preparation of sensitivity assessment of general procedure A.

| Number | Experiment                      | Preparation <sup>[a]</sup>                                 |
|--------|---------------------------------|------------------------------------------------------------|
| 0      | Standard                        | Standard                                                   |
| 1      | high <i>c</i>                   | From 0.1 M (1.0 mL) to 0.2 M (0.5 mL)                      |
| 2      | low <i>c</i>                    | From 0.1 M (1.0 mL) to 0.05 M (2.0 mL)                     |
| 3      | H <sub>2</sub> O                | Add water (10 μL)                                          |
| 4      | low <i>p</i> (H <sub>2</sub> )  | From 5 bar to 3 bar                                        |
| 5      | high <i>p</i> (H <sub>2</sub> ) | From 5 bar to 7 bar                                        |
| 6      | low <i>T</i>                    | From 80 °C to 60 °C                                        |
| 7      | high <i>T</i>                   | From 80 °C to 100 °C                                       |
| 8      | high O <sub>2</sub>             | No H <sub>2</sub> fill-and-release cycle for the autoclave |
| 9      | low O <sub>2</sub>              | Setup under argon atmosphere                               |
| 10     | big scale                       | Big scale (2.0 mmol, 0.2 M, <i>V</i> = 10.0 mL, 2 mol%)    |

<sup>[a]</sup>Pd/Al<sub>2</sub>O<sub>3</sub> (4.3 mg, 0.002 mmol, 2 mol%) was added to each reaction vessel.

## Results:

**TableS10.** Results of sensitivity assessment of general procedure A.

| Number | Experiment                      | Yield / % | Deviation / % | d.r. <sup>[a]</sup> | Deviation / % |
|--------|---------------------------------|-----------|---------------|---------------------|---------------|
| 0      | Standard                        | 90        | -             | 80:20               | -             |
| 1      | high <i>c</i>                   | 90        | 1             | 79:21               | -7            |
| 2      | low <i>c</i>                    | 31        | -66           | 84:16               | 33            |
| 3      | H <sub>2</sub> O                | 84        | -6            | 79:21               | -4            |
| 4      | low <i>p</i> (H <sub>2</sub> )  | 84        | -5            | 80:20               | -1            |
| 5      | high <i>p</i> (H <sub>2</sub> ) | 96        | 9             | 79:21               | -6            |
| 6      | low <i>T</i>                    | 68        | -24           | 80:20               | -3            |
| 7      | high <i>T</i>                   | 99        | 12            | 76:24               | -22           |
| 8      | high O <sub>2</sub>             | 75        | -16           | 79:21               | -5            |
| 9      | low O <sub>2</sub>              | 93        | 4             | 76:24               | -22           |
| 10     | big scale                       | 99        | 12            | 77:23               | -18           |

<sup>[a]</sup>Diastereomeric ratio given as *trans/cis* ratio.

## Sensitivity: yield

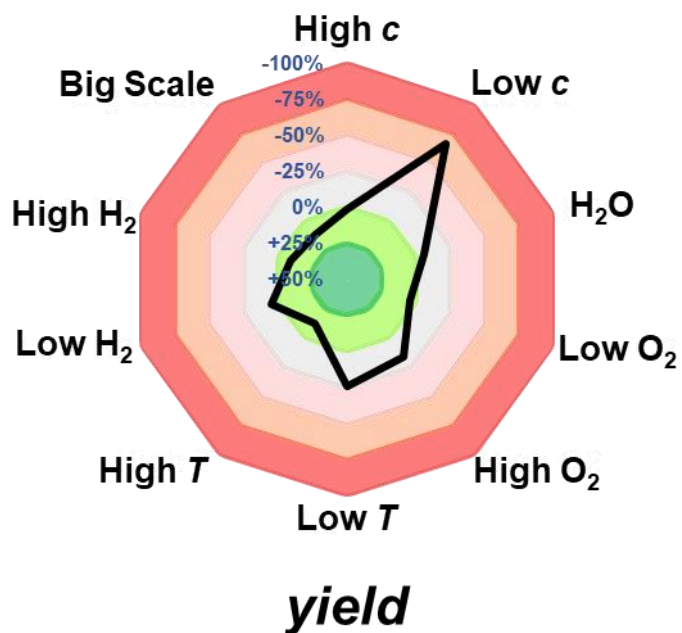

*Sensitivity: d.r.*

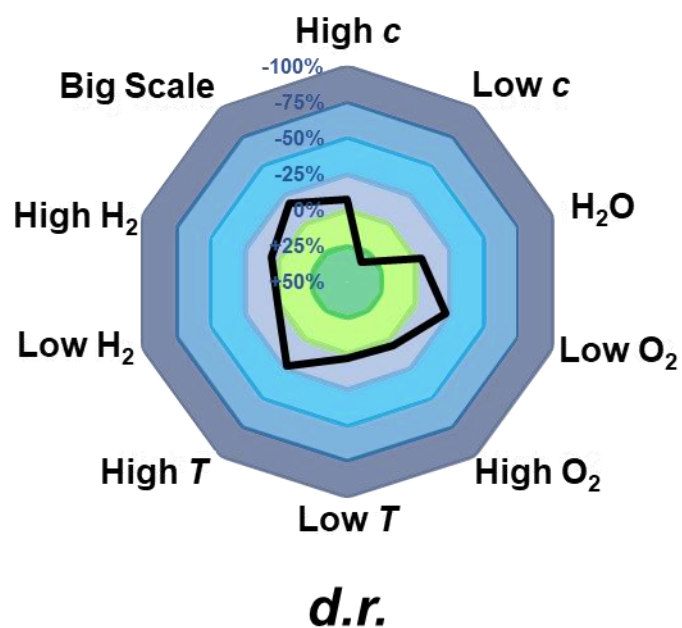

The influence on yield and diastereoselectivity was investigated by systematic variation of key reaction parameters. Notably, the yield of the reaction was found to be sensitive towards low concentration but tolerable of a range of hydrogen pressures, the presence of water, and variable oxygen levels. In general, the diastereoselectivity was insensitive towards any variation in the reaction conditions. However, there was a slight increase in diastereoselectivity connected with a drastic loss of yield when lowering the concentration.

## 11. References

- (1) Kamata, K.; Yonehara, K.; Nakagawa, Y.; Uehara, K.; Mizuno, N. Efficient Stereo- and Regioselective Hydroxylation of Alkanes Catalysed by a Bulky Polyoxometalate. *Nat. Chem.* **2010**, *2*, 478.
- (2) Wu, J.; Bär, R. M.; Guo, L.; Noble, A.; Aggarwal, V. K. Photoinduced Deoxygenative Borylations of Aliphatic Alcohols. *Angew. Chem., Int. Ed.* **2019**, *58*, 18830.
- (3) Yamada, K.; Brousseau, M.; Honma, W.; Iimura, A.; Imase, H.; Iwaki, Y.; Kawanami, T.; LaSala, D.; Liang, G.; Mitani, H.; Nonomura, K.; Ohmori, O.; Pan, M.; Rigel, D. F.; Umemura, I.; Yasoshima, K.; Zhu, G.; Mogi, M. Discovery of a Novel Piperidine-Based Inhibitor of Cholesteryl Ester Transfer Protein (CETP) That Retains Activity in Hypertriglyceridemic Plasma. *J. Med. Chem.* **2017**, *60*, 8466.
- (4) Sarkar, M. R.; Dasgupta, S.; Pyke, S. M.; Bell, S. G. Selective Biocatalytic Hydroxylation of Unactivated Methylene C–H Bonds in Cyclic Alkyl Substrates. *Chem. Commun.* **2019**, *55*, 5029.
- (5) Gärtner, D.; Stein, A. L.; Grupe, S.; Arp, J.; von Wangelin, A. J. Iron-Catalyzed Cross-Coupling of Alkenyl Acetates. *Angew. Chem., Int. Ed.* **2015**, *54*, 10545.
- (6) Krishnamurthy, S.; Venkataprasad, J.; Vagvala, T. C.; Moriguchia, T.; Tsuge, A.  $\alpha$ -Chymotrypsin and L-Acylase Aided Synthesis of 5-Hydroxypipericolic Acid via Jacobsen's Hydrolytic Kinetic Resolution of Epoxy Amino Acids. *RSC Adv.* **2015**, *5*, 52154.
- (7) Huang, W.-X.; Yu, C.-B.; Ji, Y.; Liu, L.-J.; Zhou, Y.-G. Iridium-Catalyzed Asymmetric Hydrogenation of Heteroaromatics Bearing a Hydroxyl Group, 3-Hydroxypyridinium Salts. *ACS Catal.* **2016**, *6*, 2368.
- (8) Wiesenfeldt, M. P.; Nairoukh, Z.; Li, W.; Glorius, F. Hydrogenation of Fluoroarenes: Direct Access to all-*cis*-(Multi)fluorinated Cycloalkanes. *Science* **2017**, *357*, 908.
- (9) Sviatenko, O.; Ríos-Lombardía, N.; Morís, F.; González-Sabín, J.; Manideep, K. V.; Merdivan, S.; Günther, S.; Süß, P.; Höhne, M. One-pot Synthesis of 4-Aminocyclohexanol Isomers by Combining a Keto Reductase and an Amine Transaminase. *ChemCatChem* **2019**, *11*, 5794.
- (10) Wang, D.-W.; Lu, S.-M.; Zhou, Y.-G. A Simple and Highly Effective Method for Hydrogenation of Arenes by [Rh(COD)Cl]<sub>2</sub>. *Tetrahedron Lett.* **2009**, *50*, 1282.
- (11) Wollenburg, M.; Moock, D.; Glorius, F. Hydrogenation of Borylated Arenes. *Angew. Chem., Int. Ed.* **2019**, *58*, 6549.



- (12) Vasseur, A.; Membrat, R.; Gatineau, D.; Tenaglia, A.; Nuel, D.; Giordano, L. Secondary Phosphine Oxides as Multitalented Preligands En Route to the Chemoselective Palladium-Catalyzed Oxidation of Alcohols. *ChemCatChem* **2017**, *9*, 728.
- (13) Seo, J. W.; Comminos, J. S.; Chi, D. Y.; Kim, D. W.; Carlson, K. E.; Katzenellenbogen, J. A. Fluorine-Substituted Cyclofenil Derivatives as Estrogen Receptor Ligands: Synthesis and Structure-Affinity Relationship Study of Potential Positron Emission Tomography Agents for Imaging Estrogen Receptors in Breast Cancer. *J. Med. Chem.* **2006**, *49*, 2496.
- (14) Kamal, A.; Ramana, K. V.; Ramana, A. V.; Babu, A. H. Chemoenzymatic Enantioselective Synthesis of 3-Hydroxy-2-pyrrolidinones and 3-Hydroxy-2-piperidinones. *Tetrahedron: Asymmetry* **2003**, *14*, 2587.
- (15) Latli, B.; Hrapchak, M.; Switek, H.-K.; Retz, D. M.; Krishnamurthy, D.; Senanayake, C. H. Synthesis of Labeled Ambroxol and its Major Metabolites. *J. Label. Compd. Radiopharm.* **2010**, *53*, 15.
- (16) Diao, T.; Stahl, S. S. Synthesis of Cyclic Enones via Direct Palladium-Catalyzed Aerobic Dehydrogenation of Ketones. *J. Am. Chem. Soc.* **2011**, *133*, 14566.
- (17) Kwart, H.; Conley, R. A. Modified Birch Reductions. Lithium in *n*-Alkylamines. *J. Org. Chem.* **1973**, *38*, 2011.
- (18) Bolon, D. A. Generation of *o*-Quinone Methides in Solution. Trimerization. *J. Org. Chem.* **1970**, *35*, 715.
- (19) Mills, L. R.; Zhou, C.; Fung, E.; Rousseaux, S. A. L. Ni-Catalyzed  $\beta$ -Alkylation of Cyclopropanol-Derived Homo-enolates. *Org. Lett.* **2019**, *21*, 8805.
- (20) Pitzer, L.; Schäfers, F.; Glorius, F. Rapid Assessment of the Reaction-Condition-Based Sensitivity of Chemical Transformations. *Angew. Chem., Int. Ed.* **2019**, *58*, 8572.

## 12. NMR Spectra

### 11.1 *trans*-Cyclohexanols

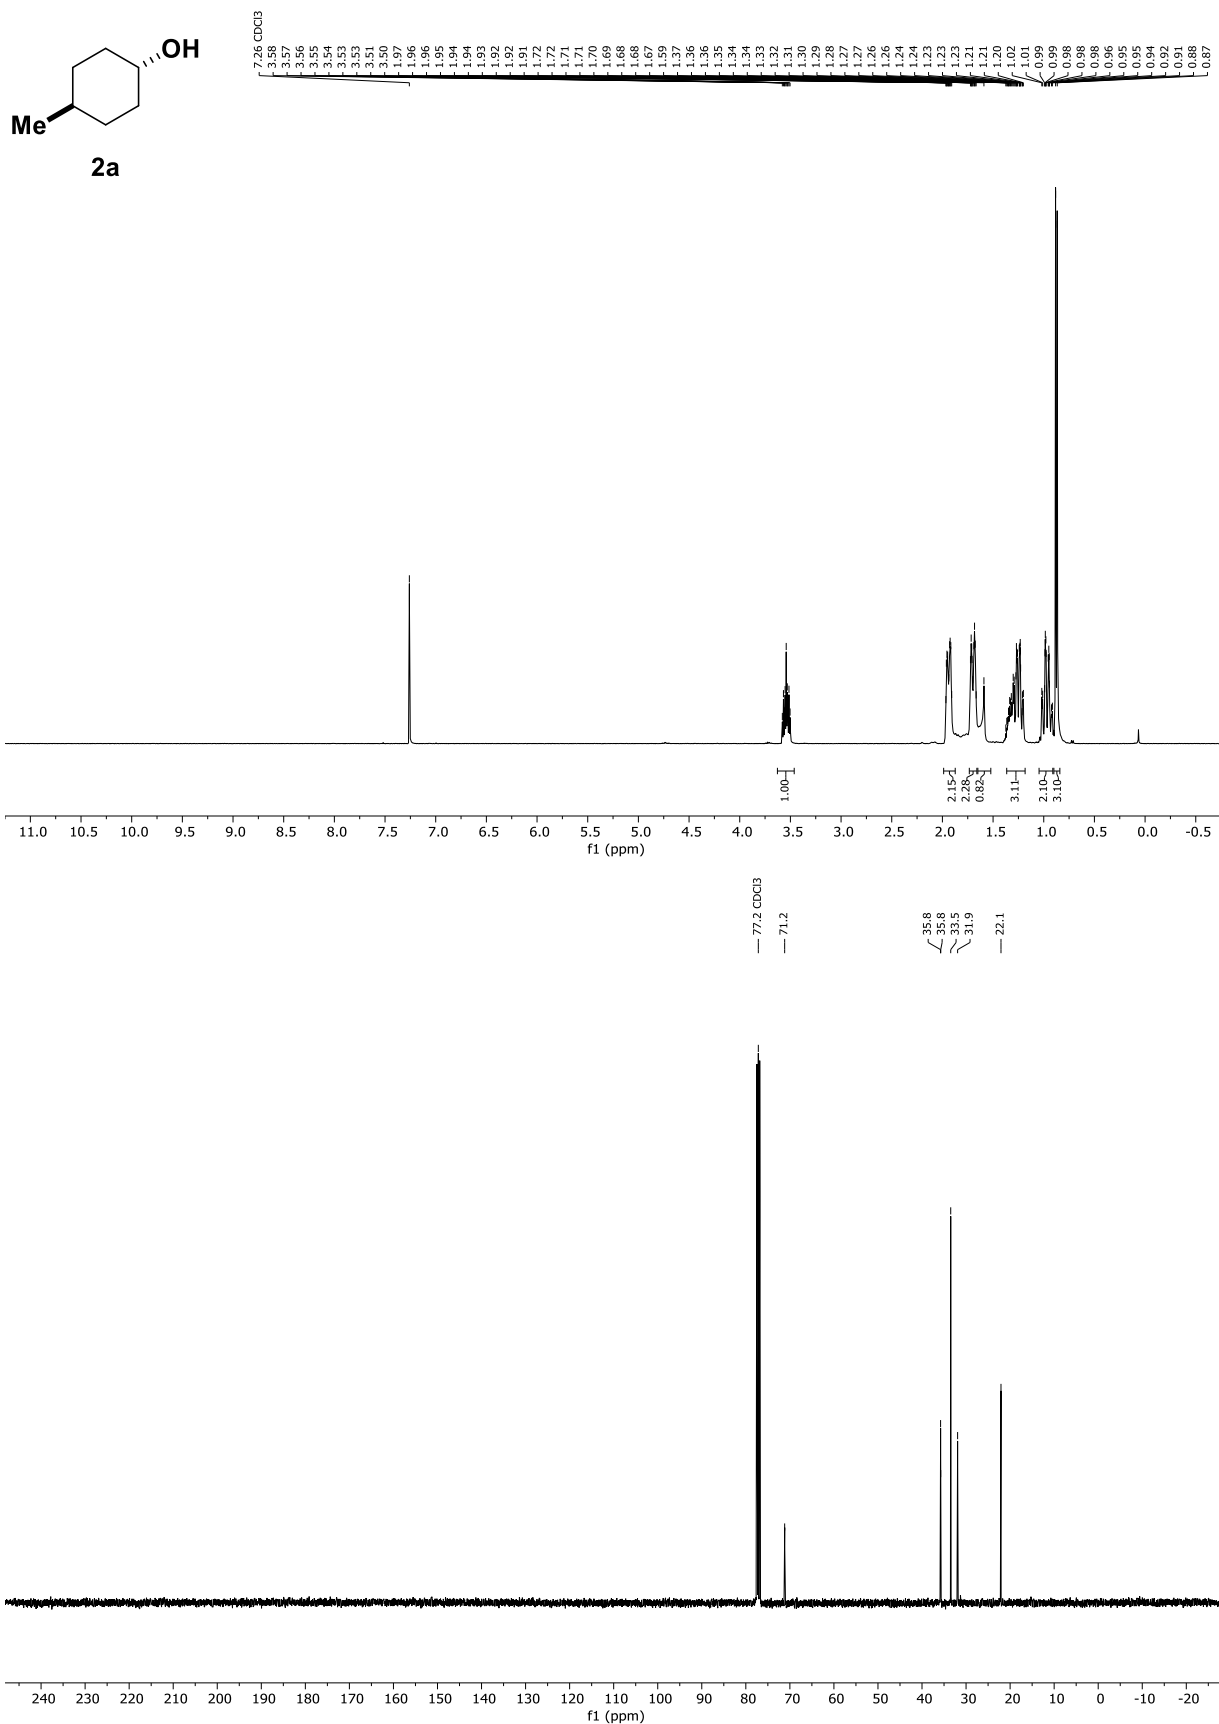

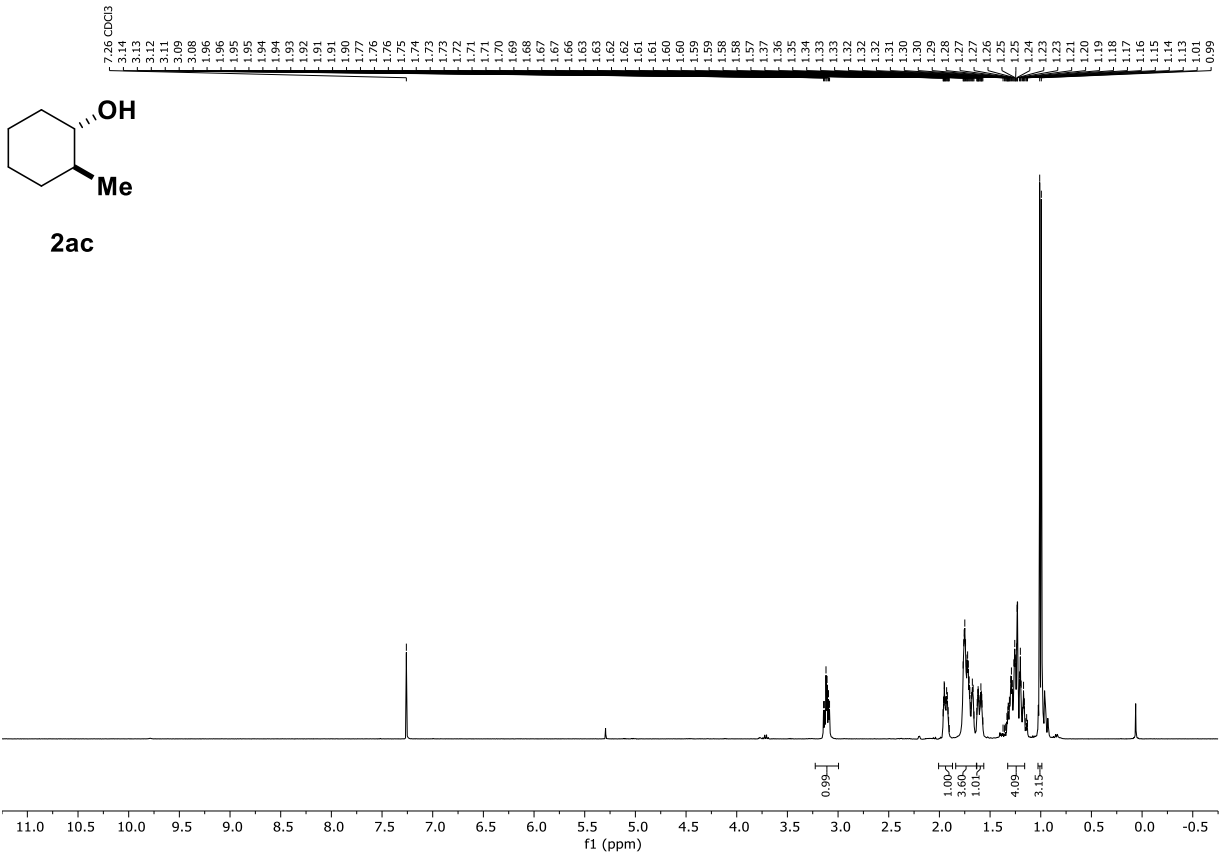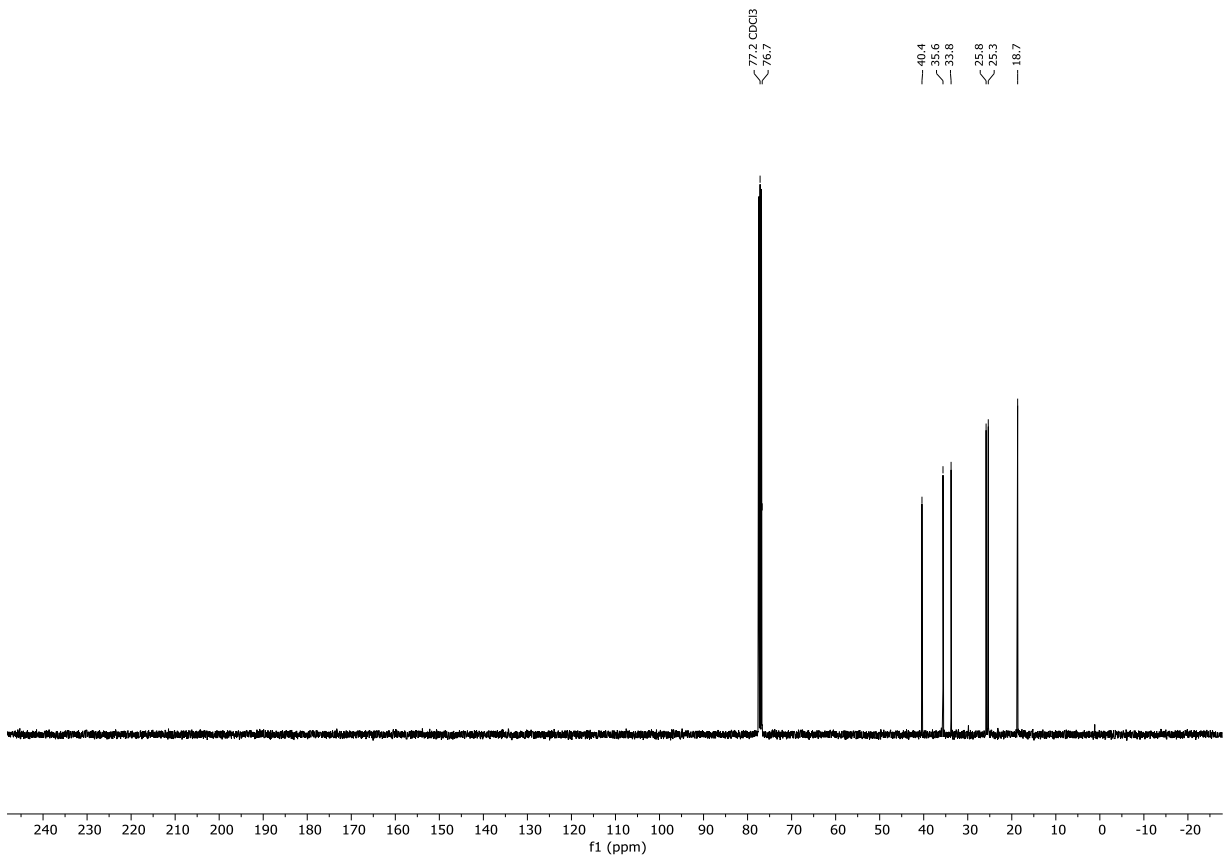

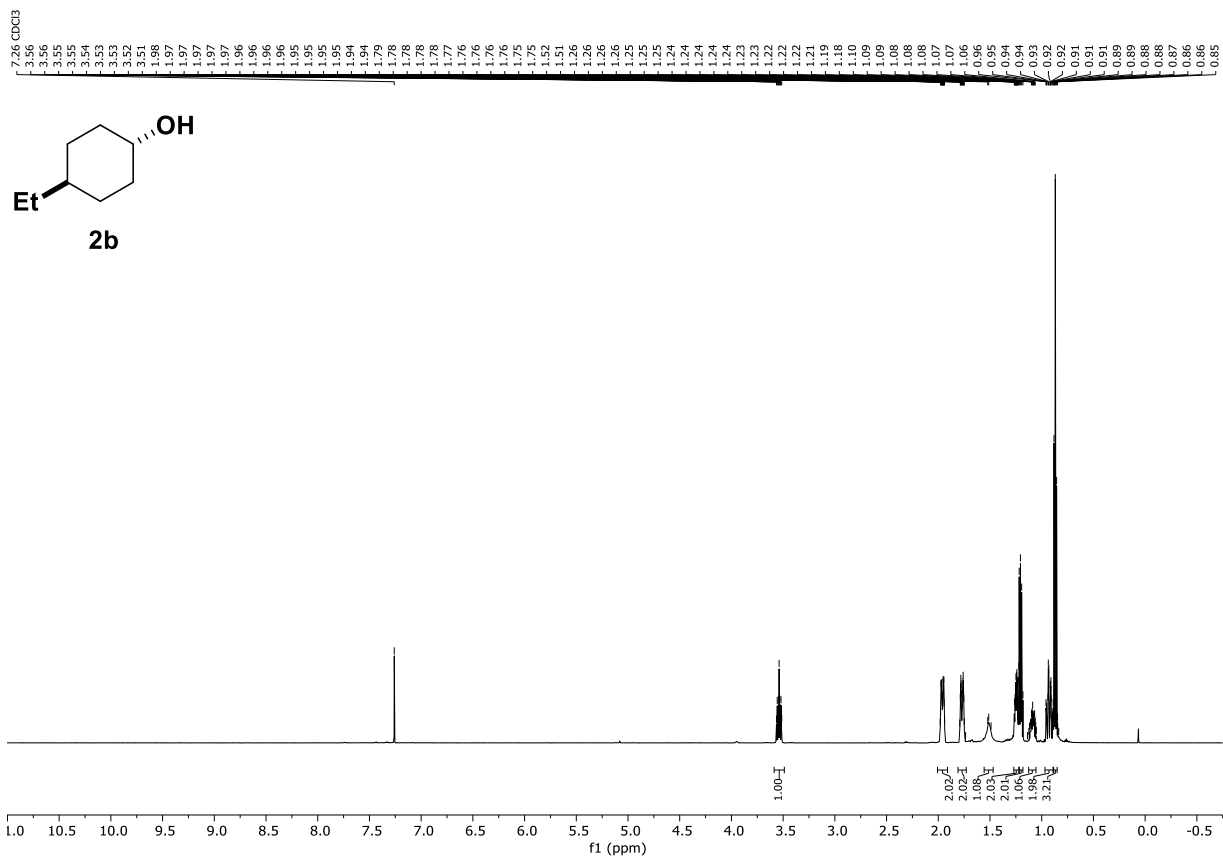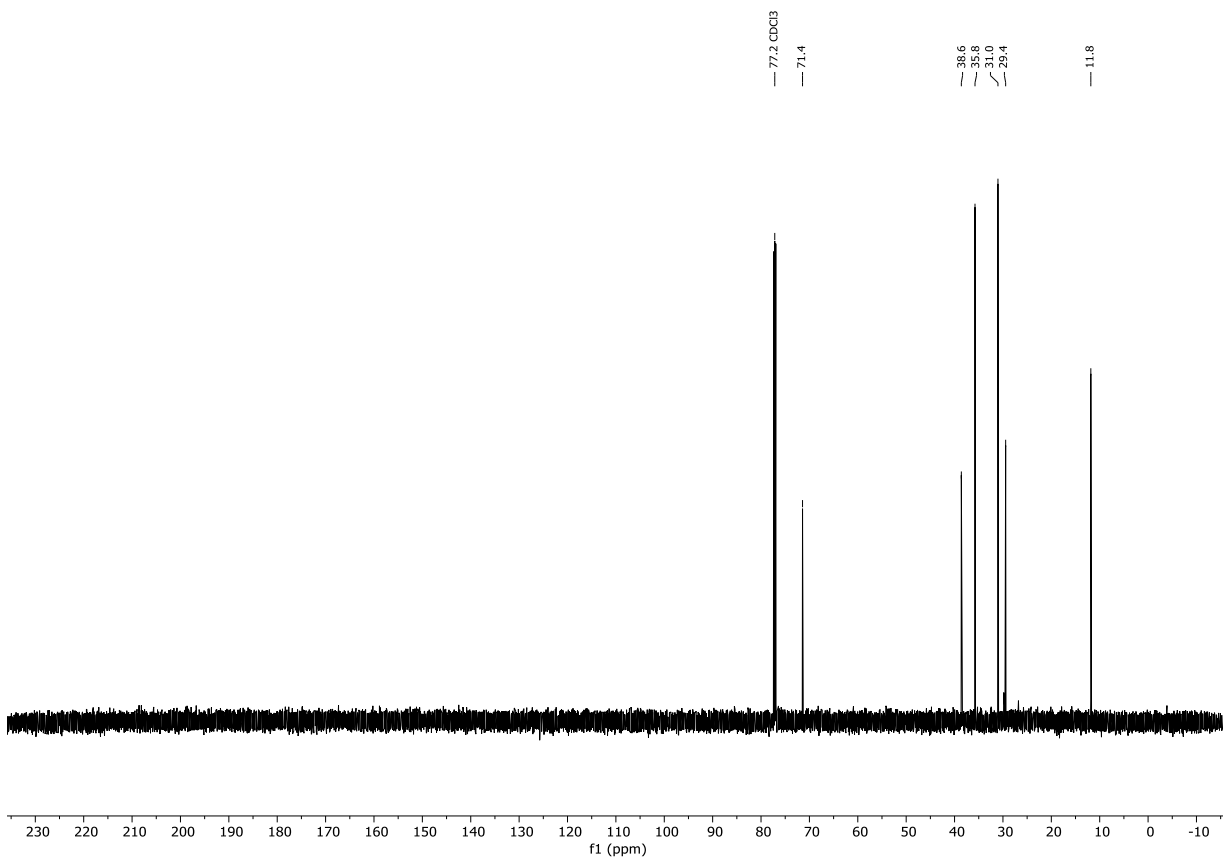

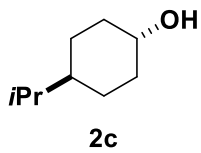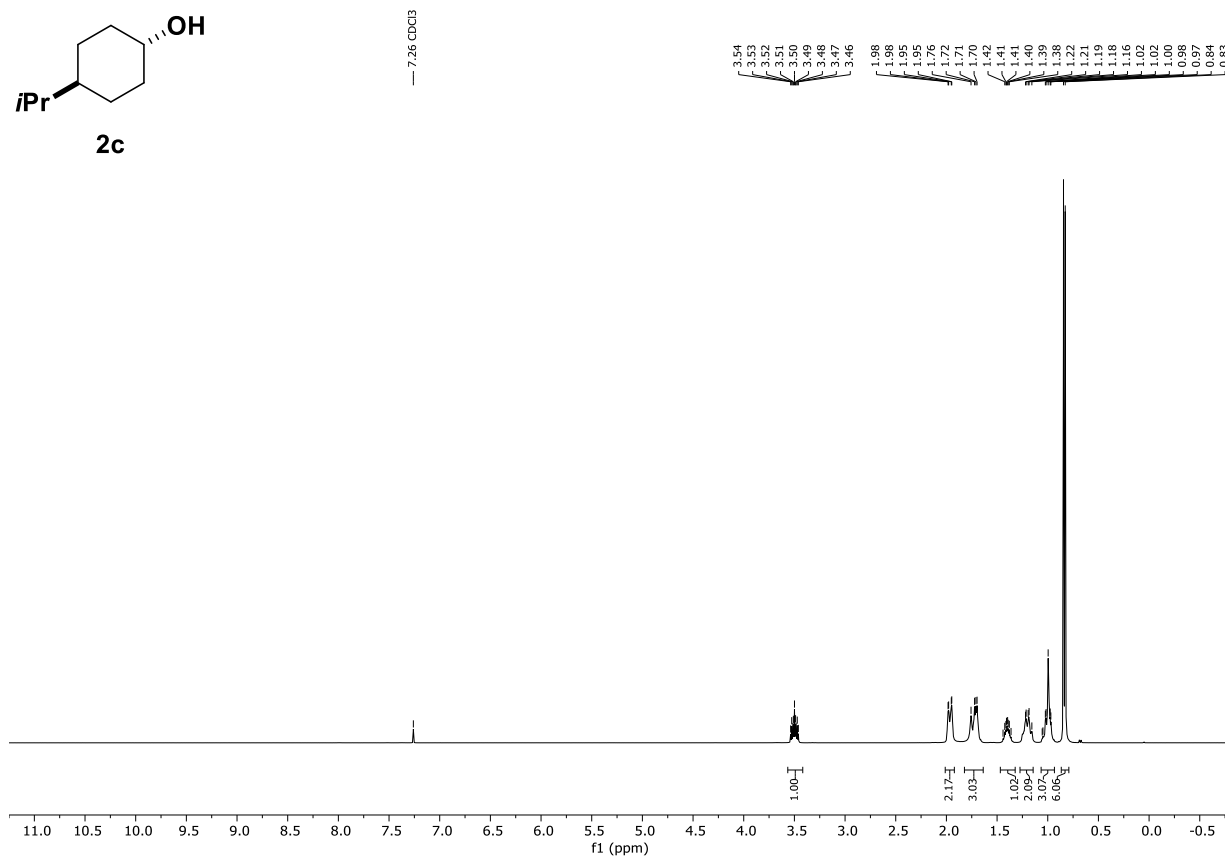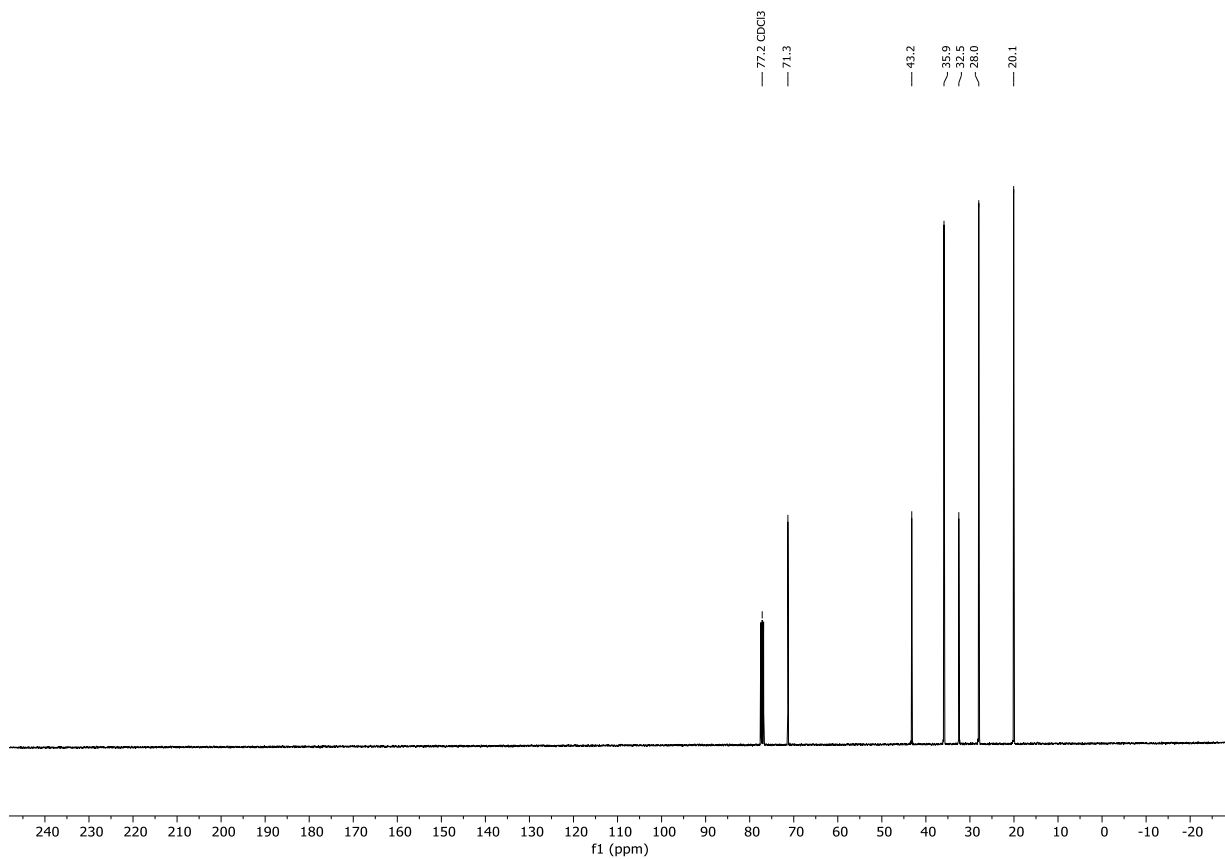

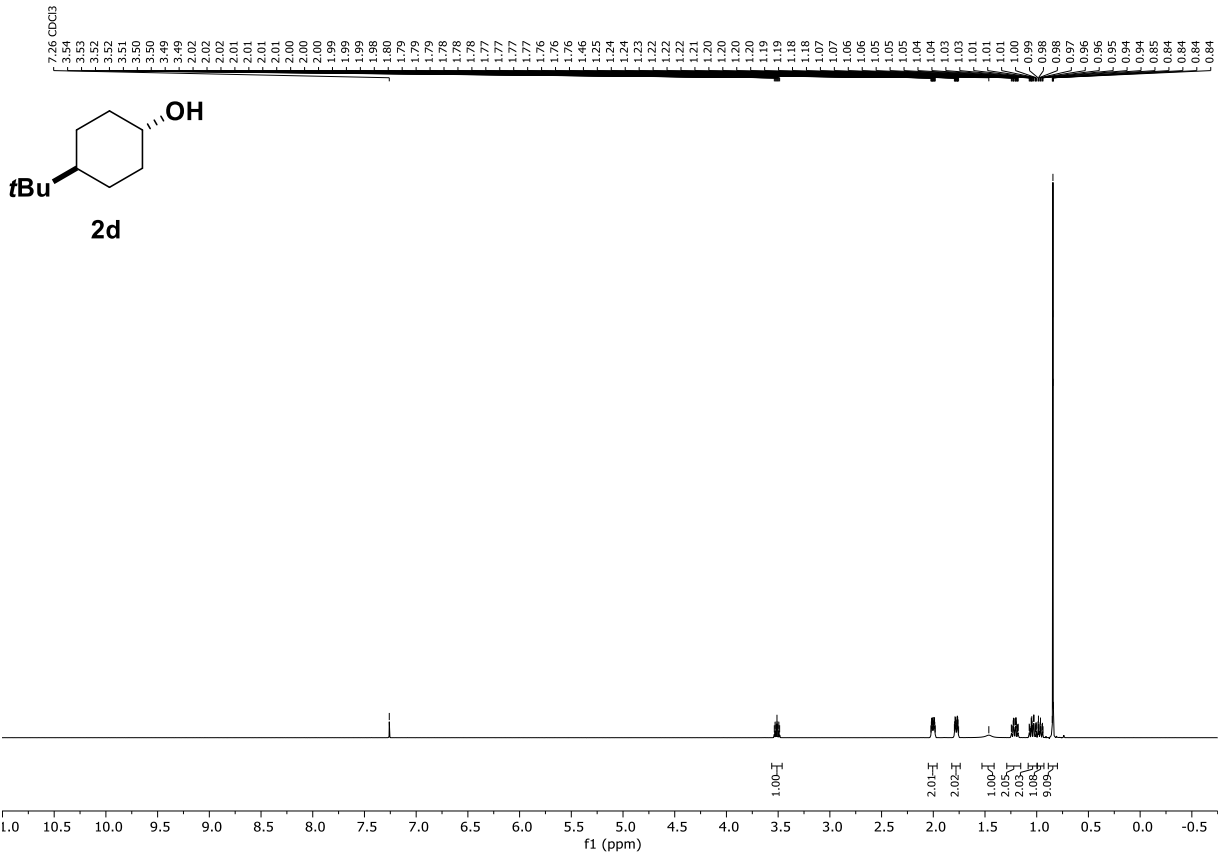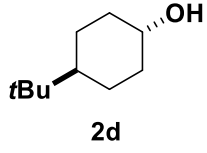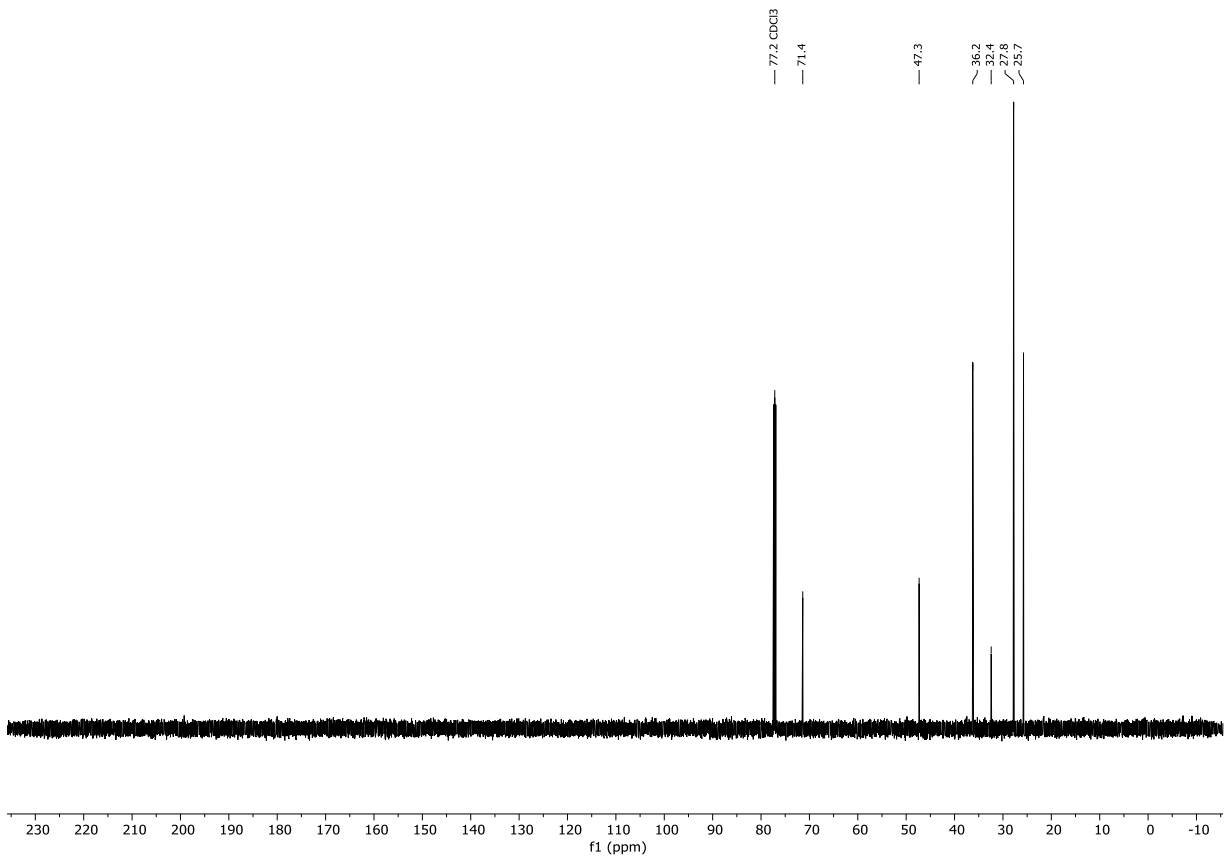

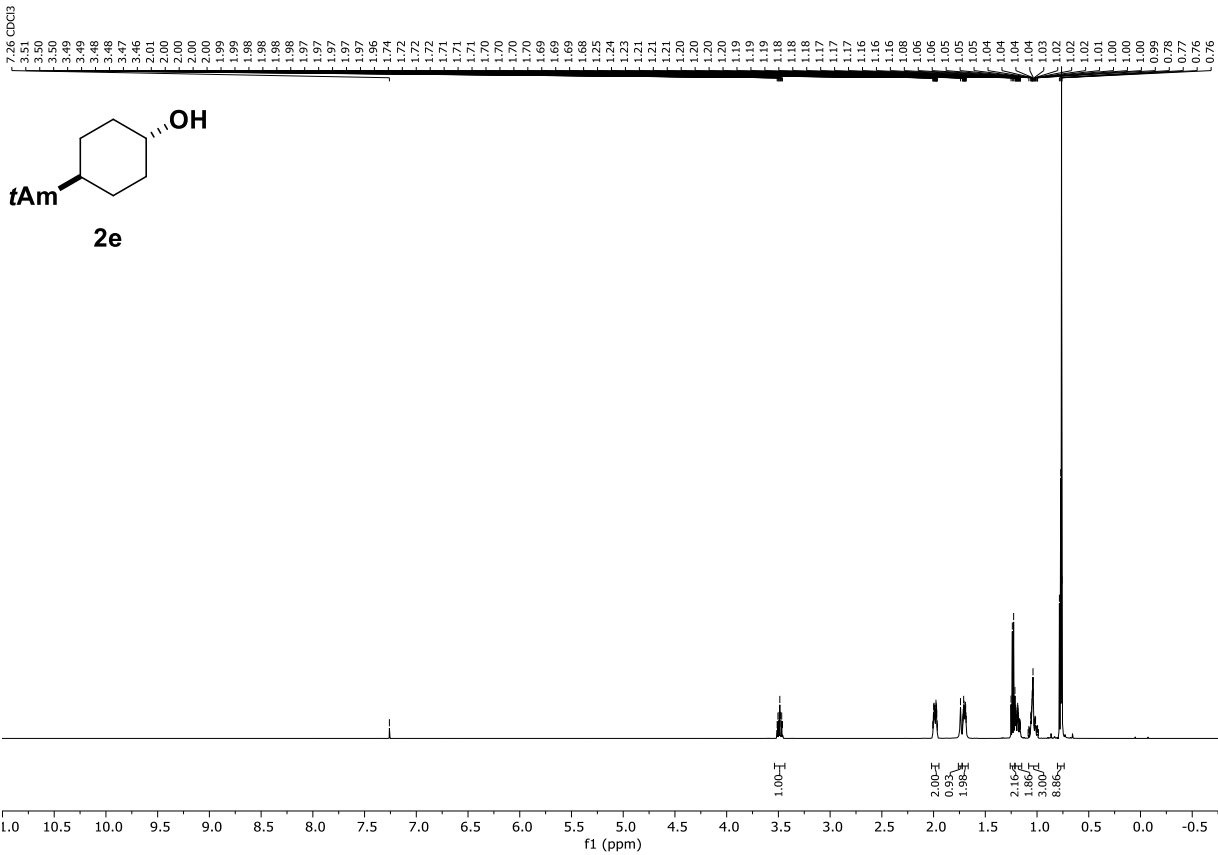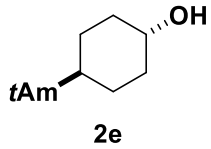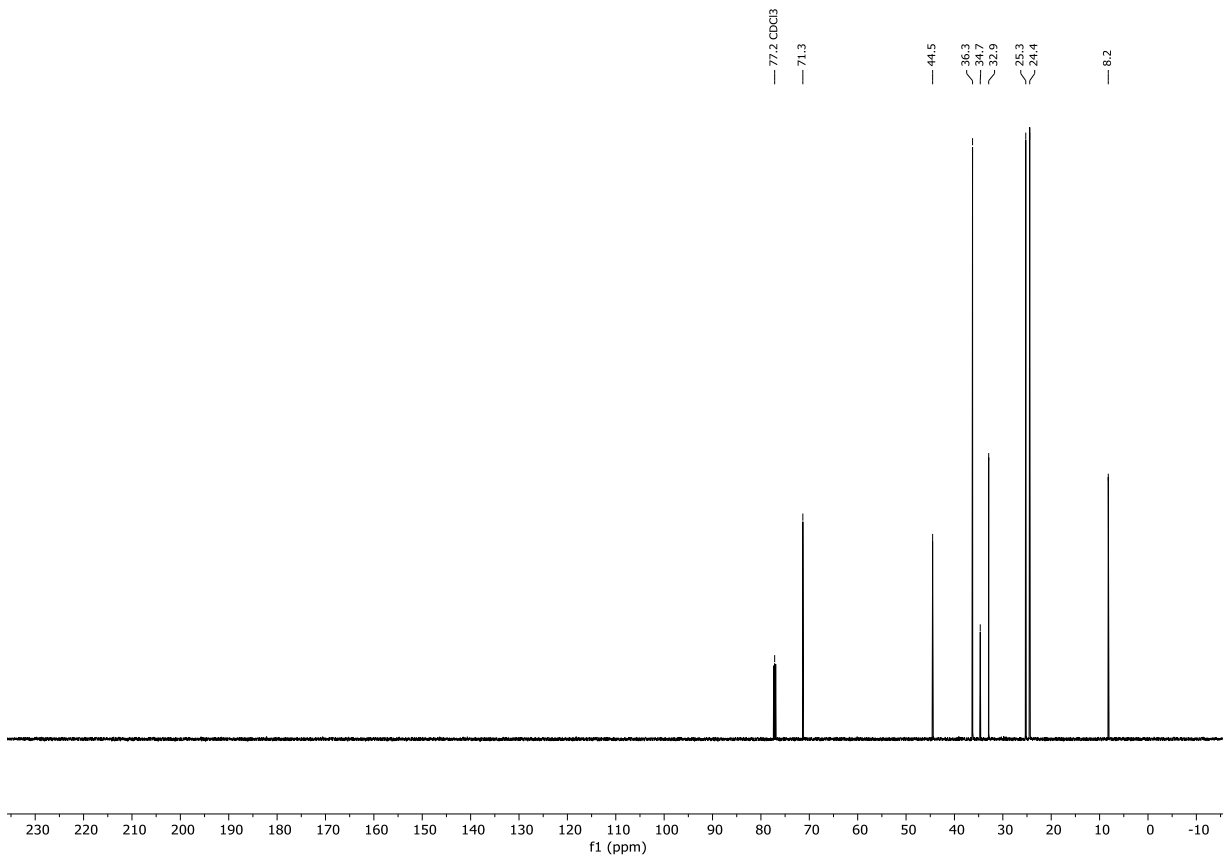





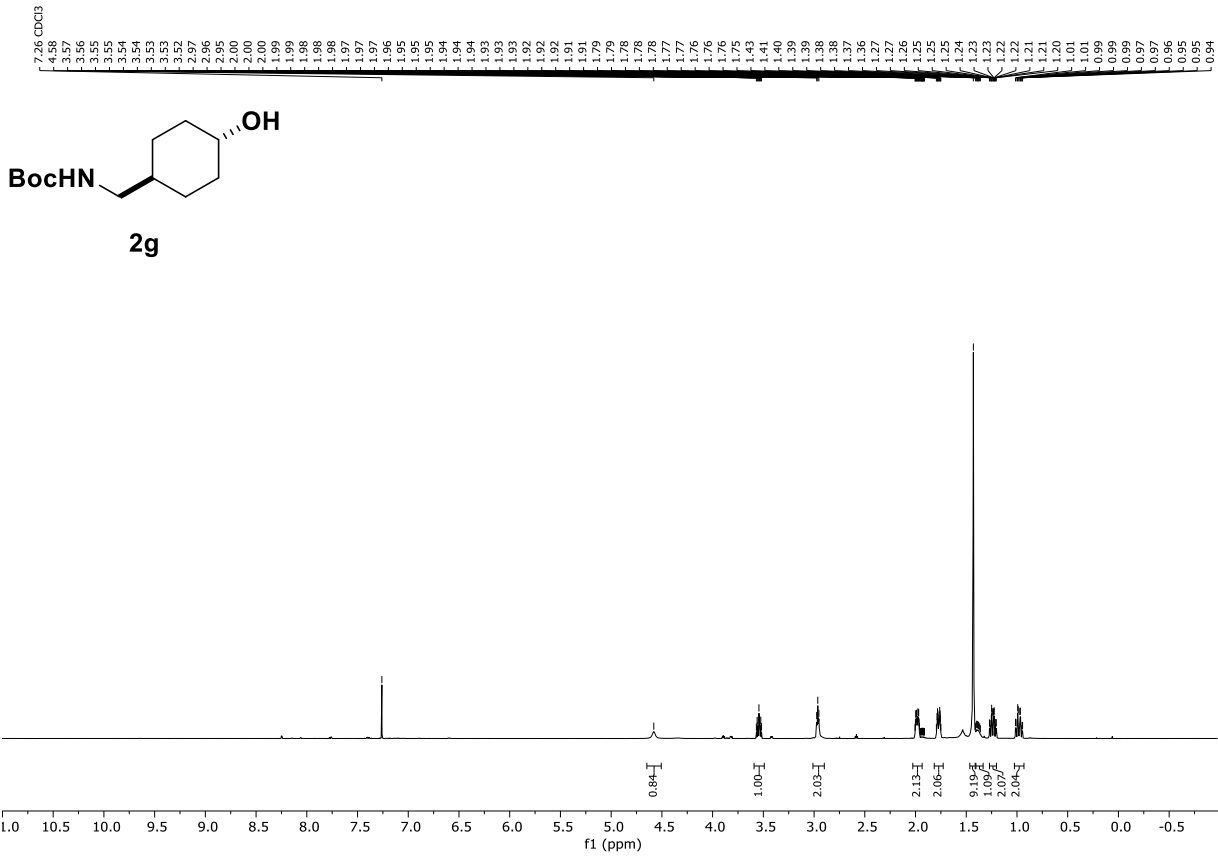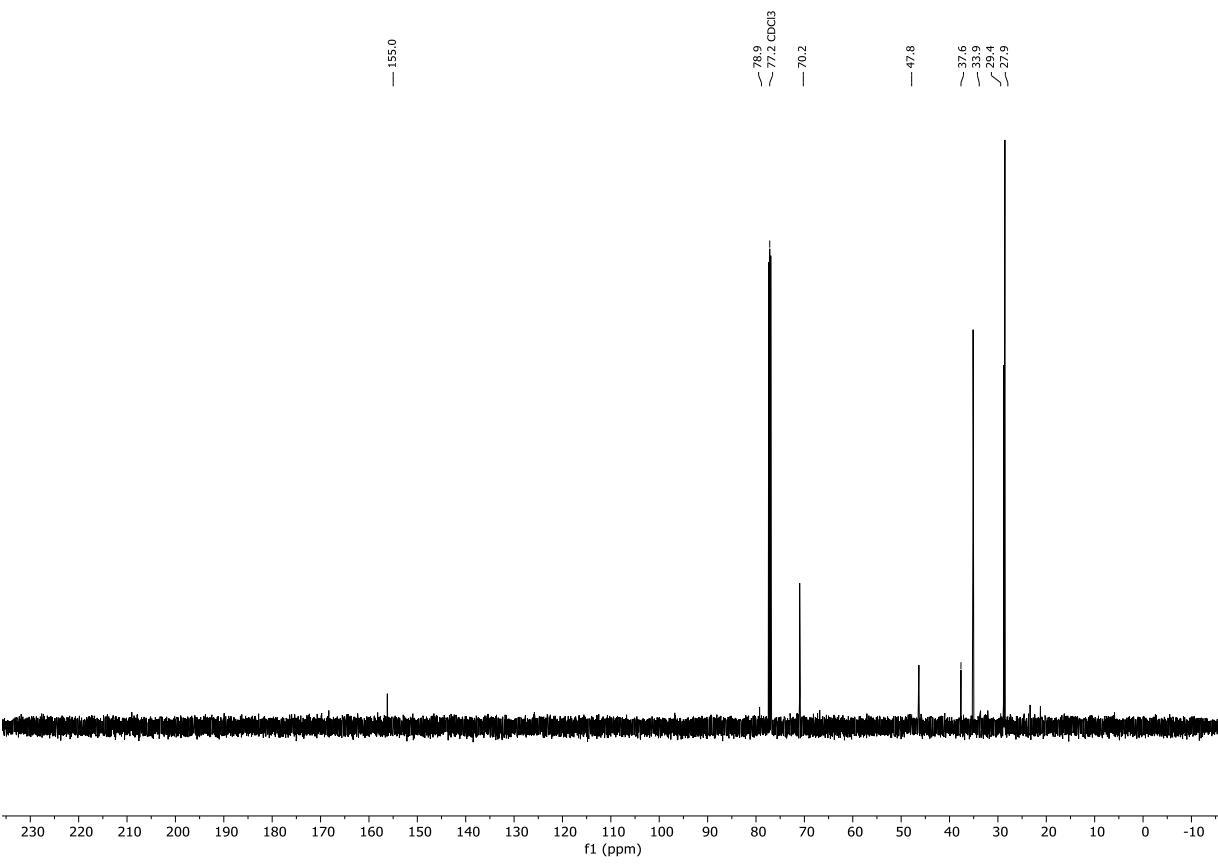

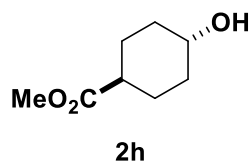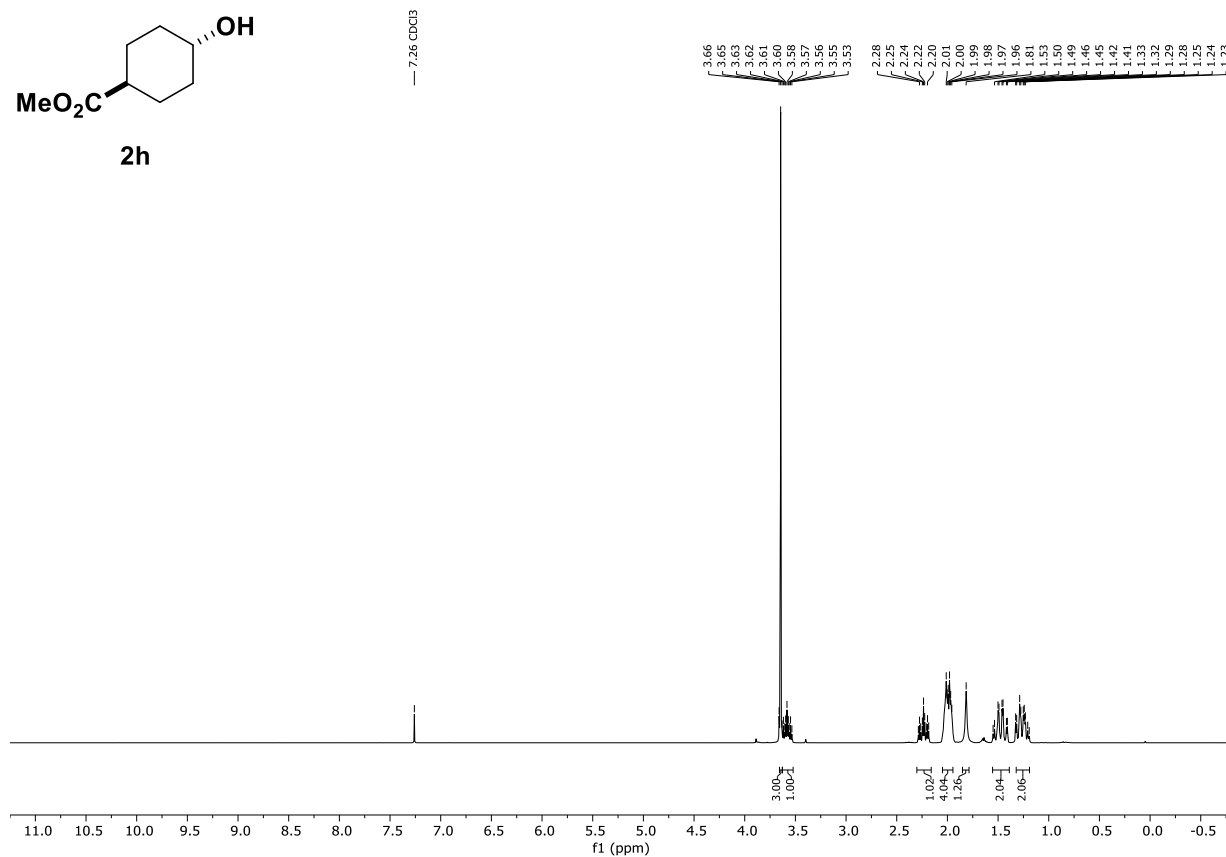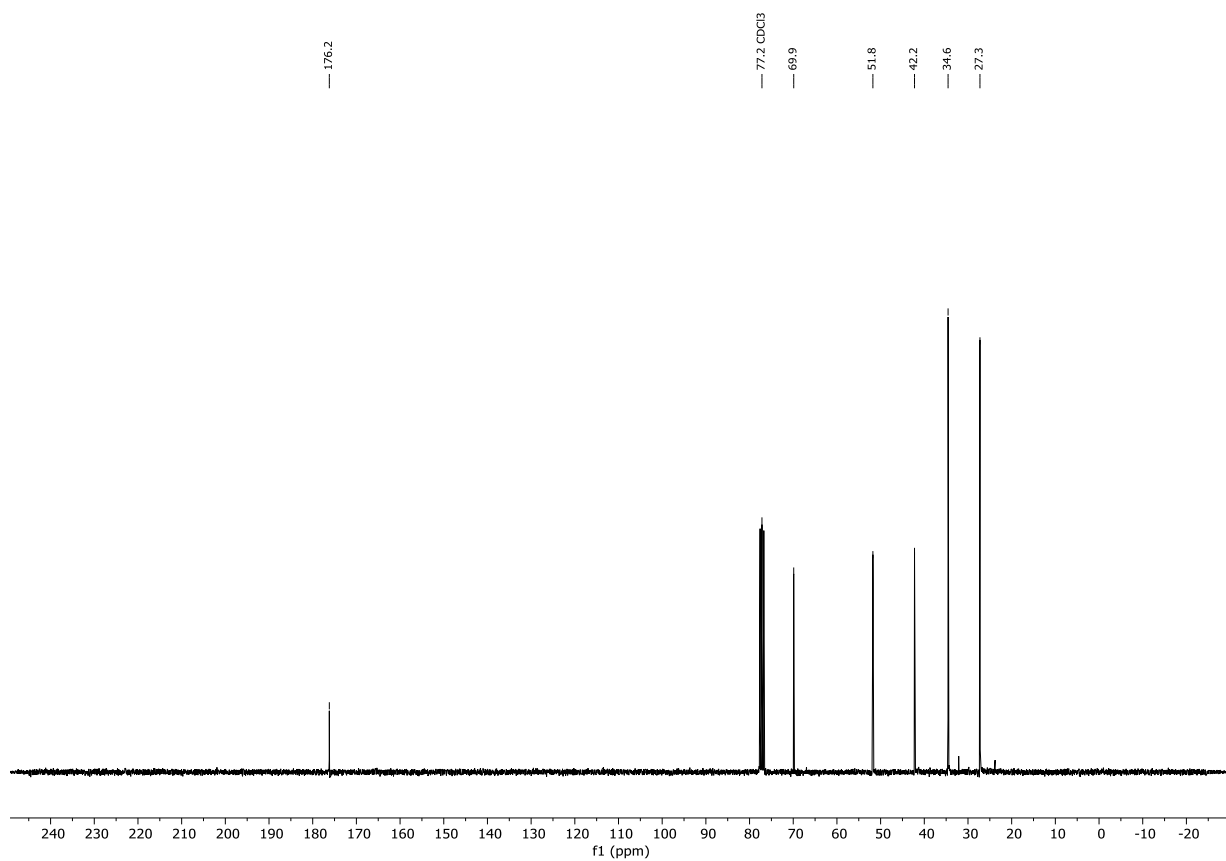

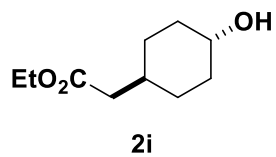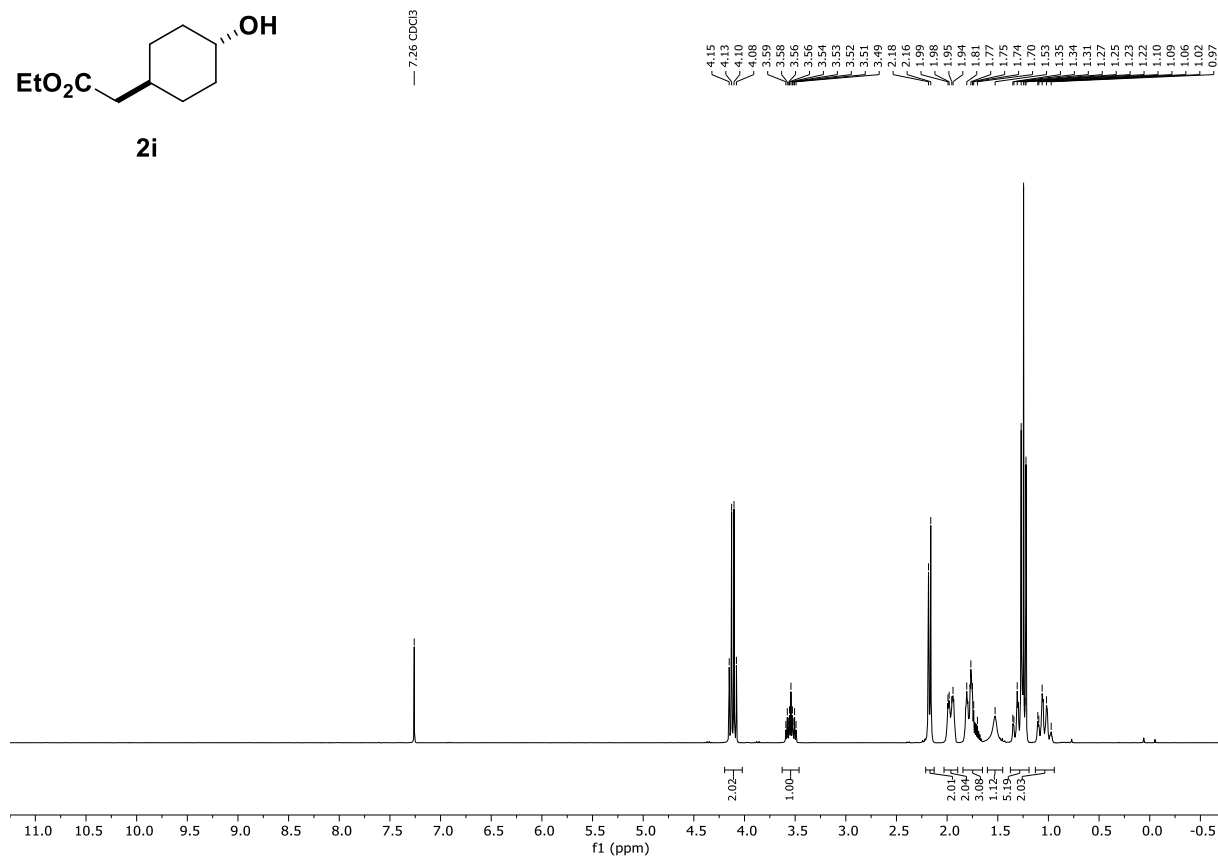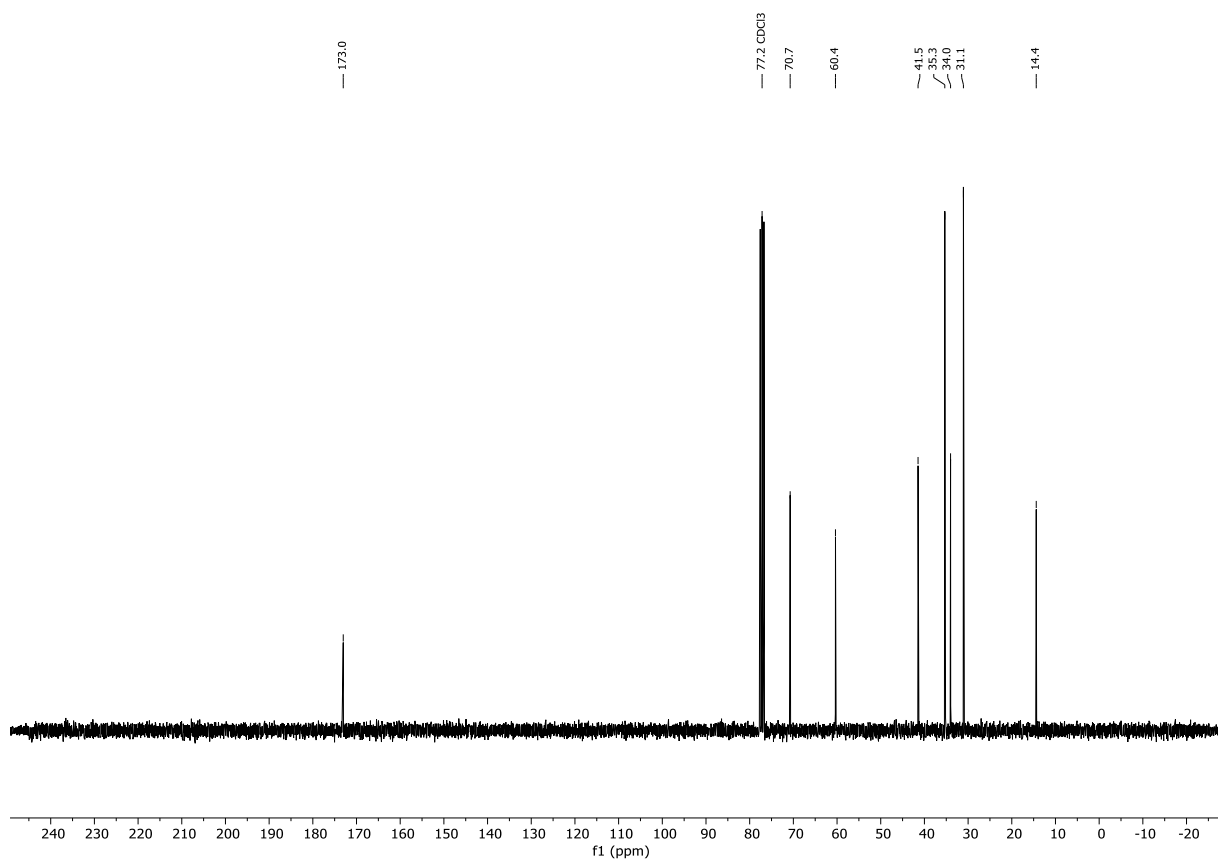

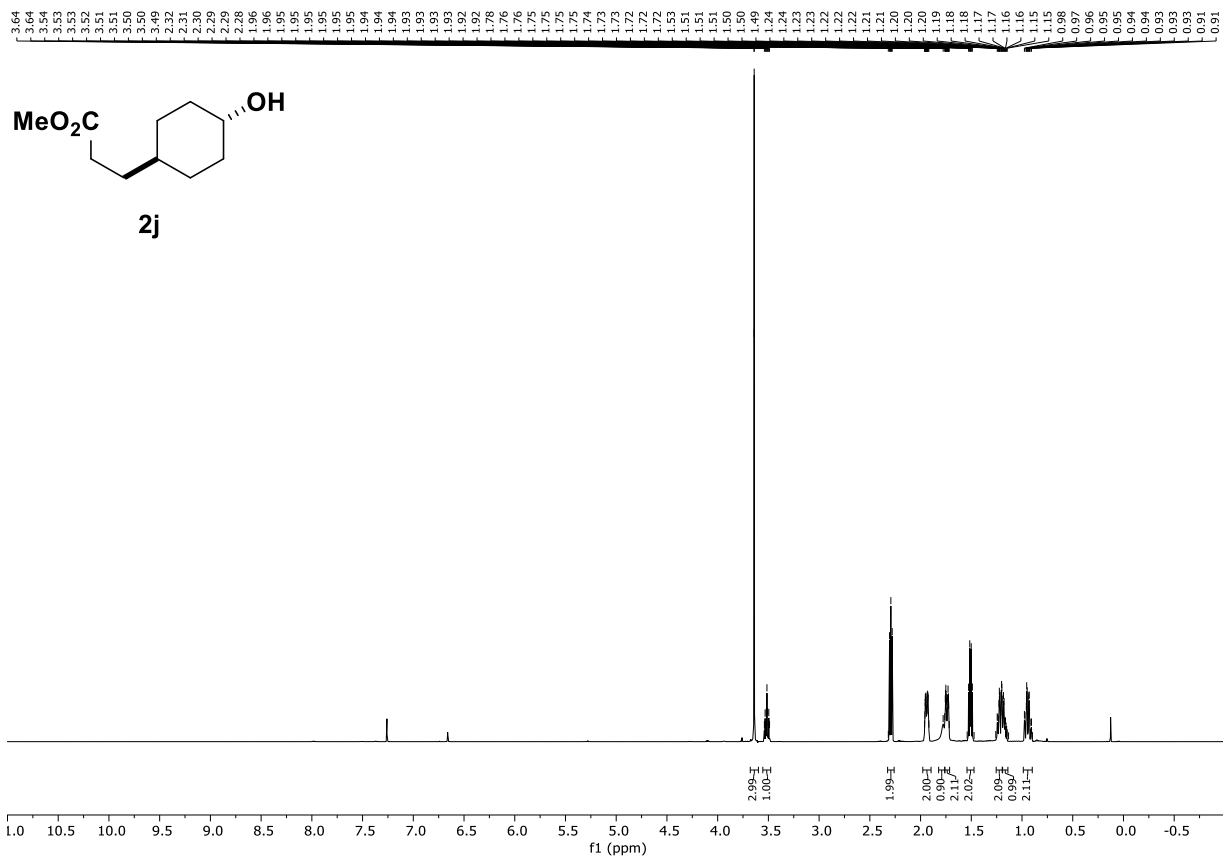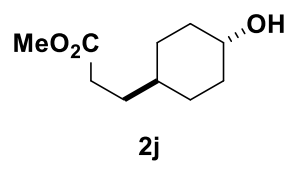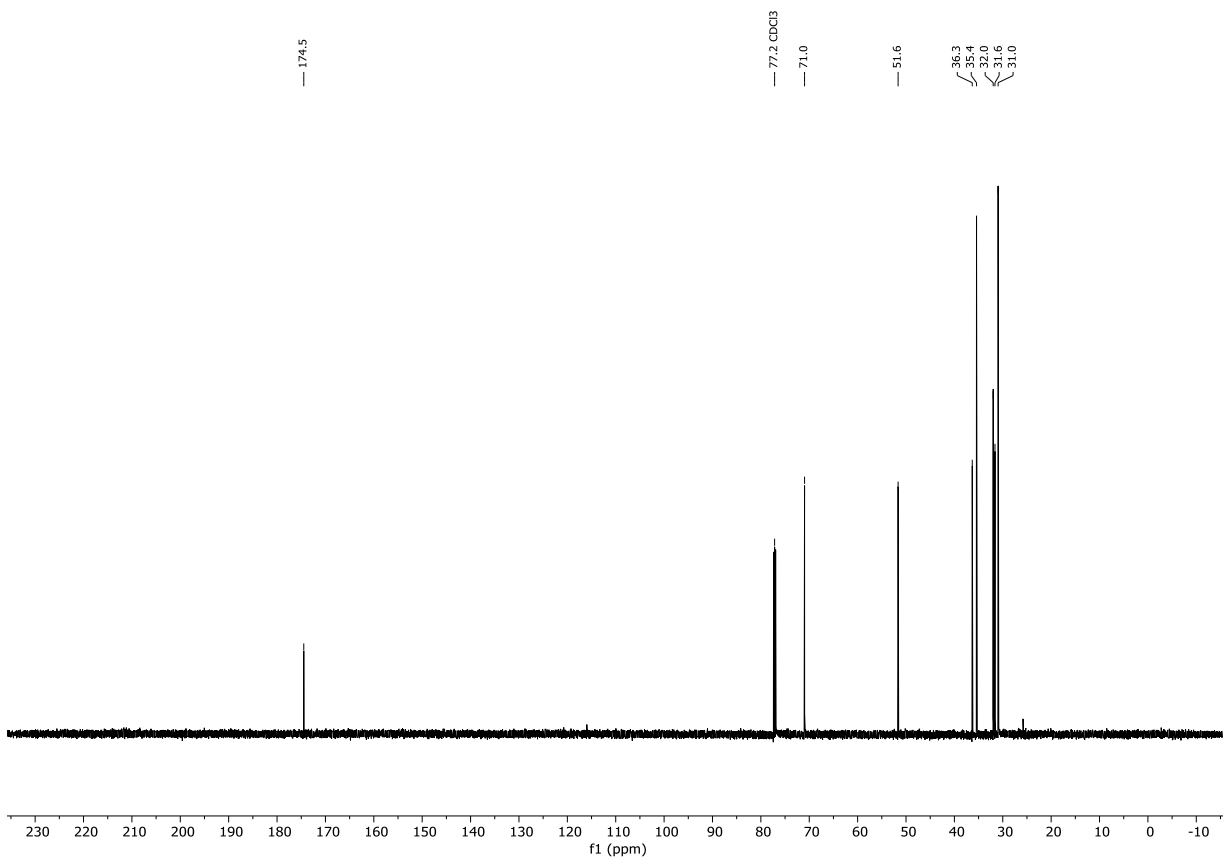

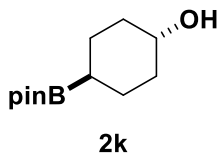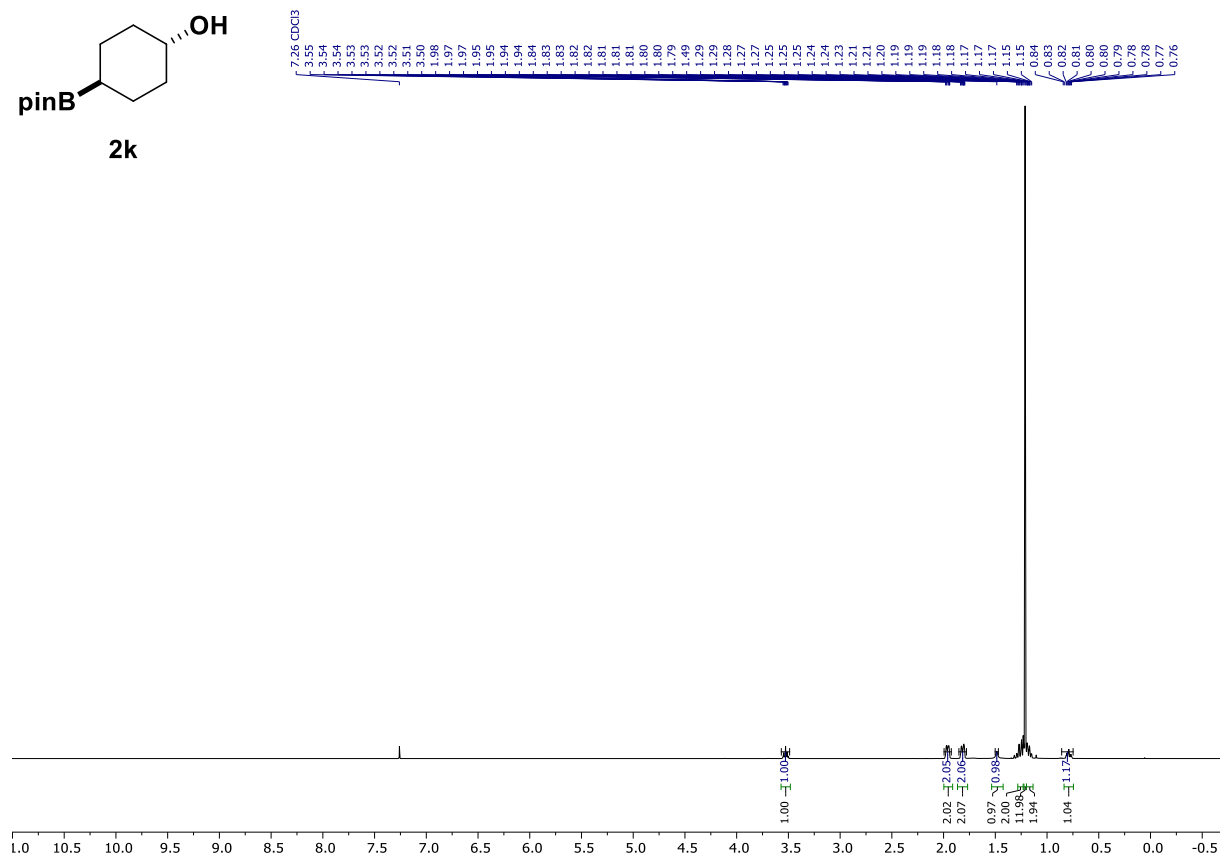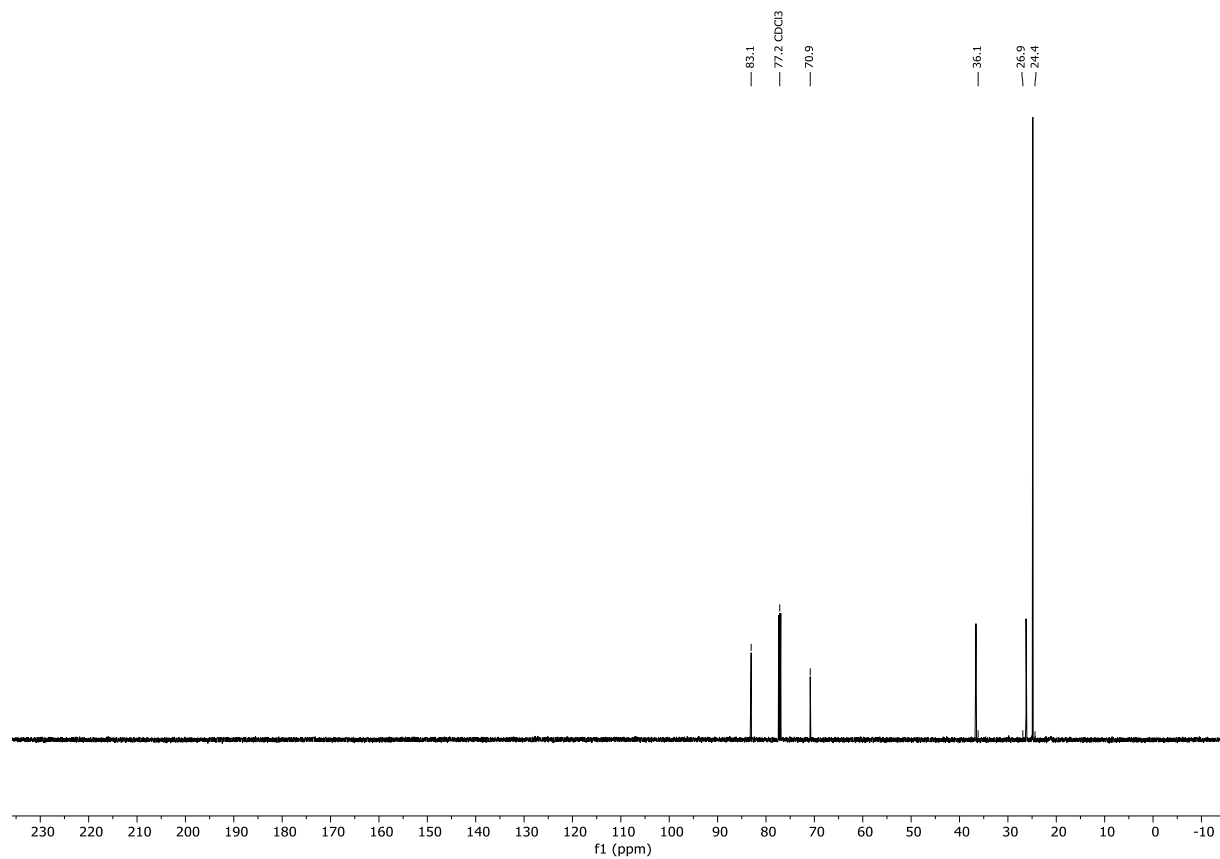





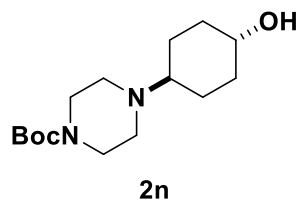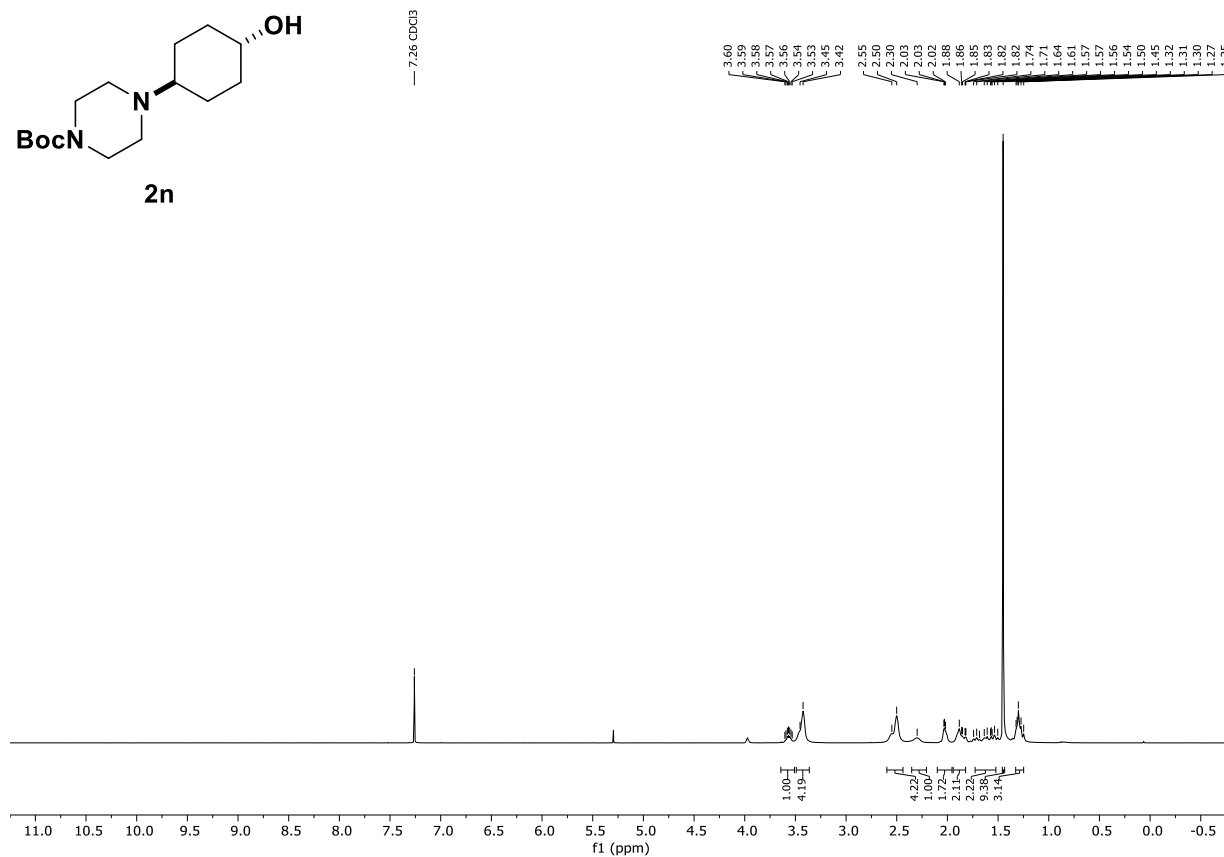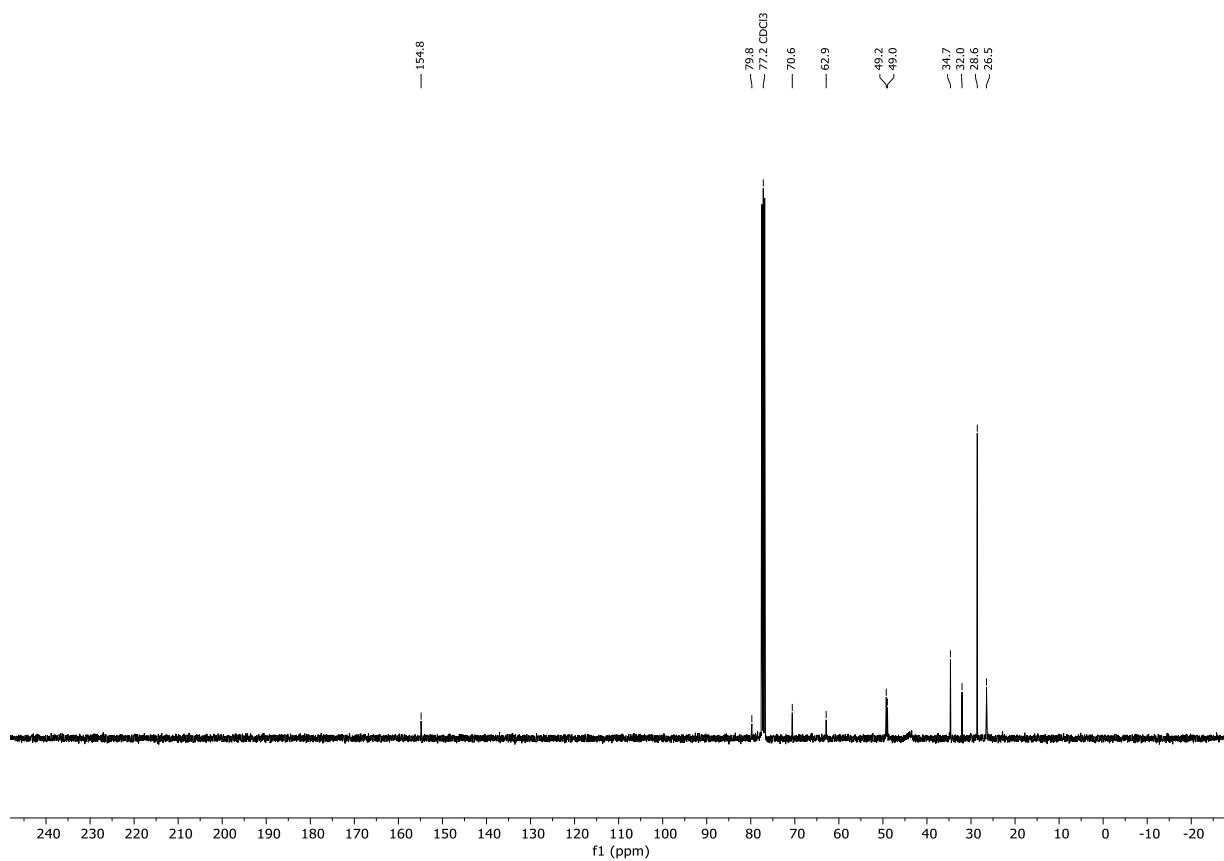



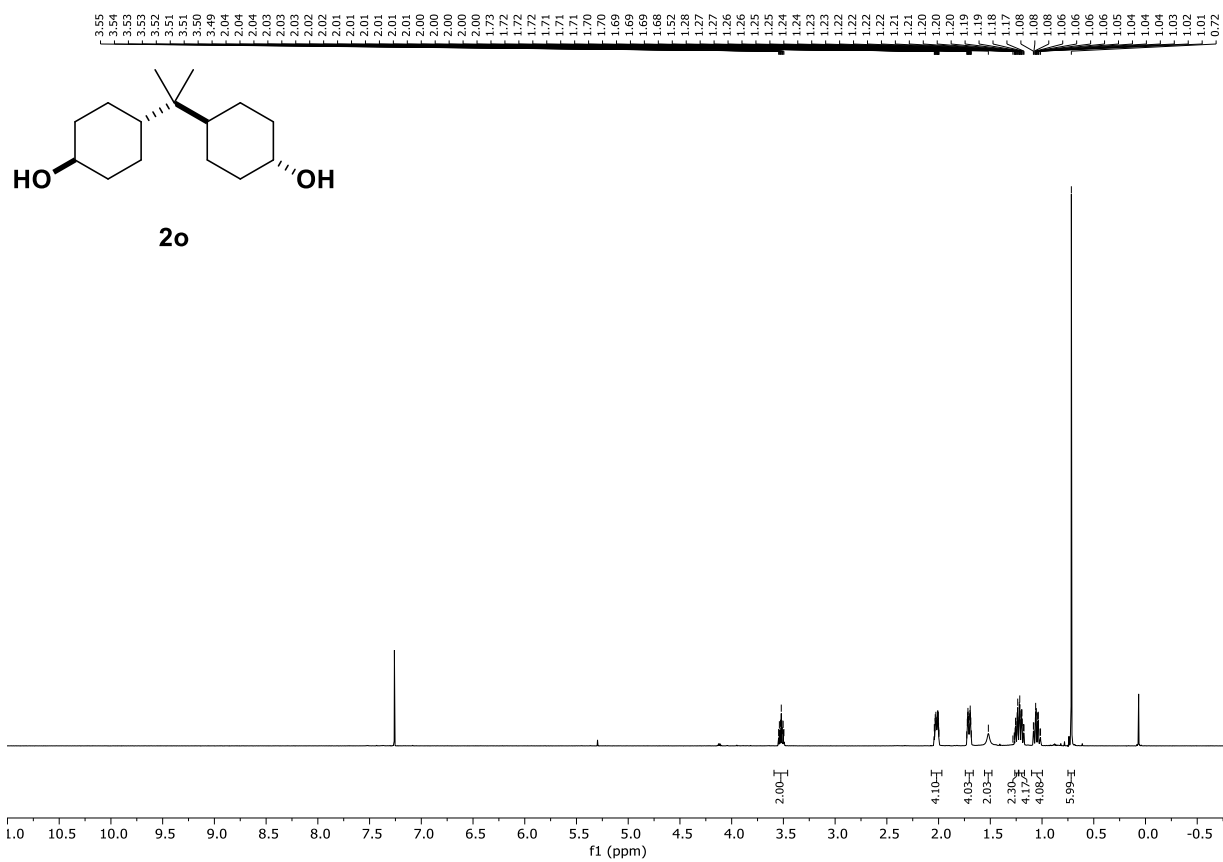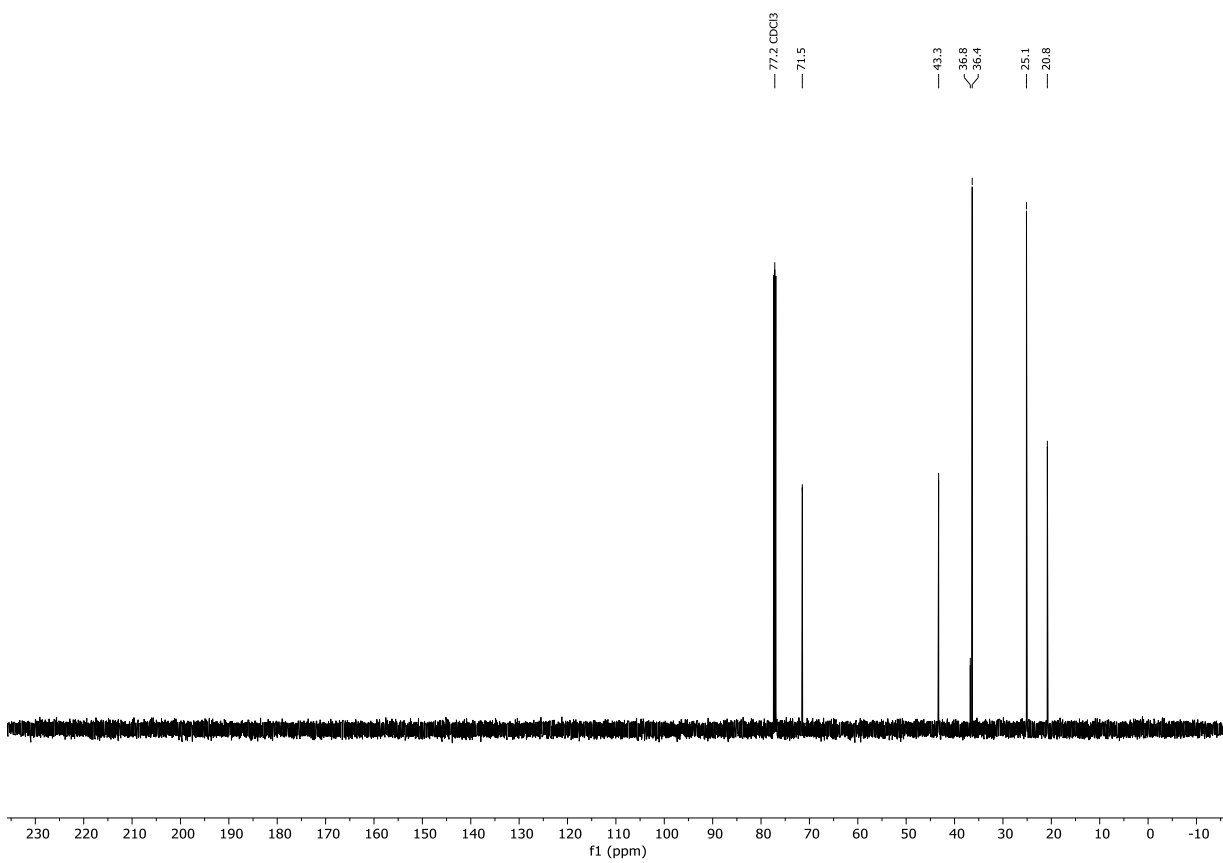

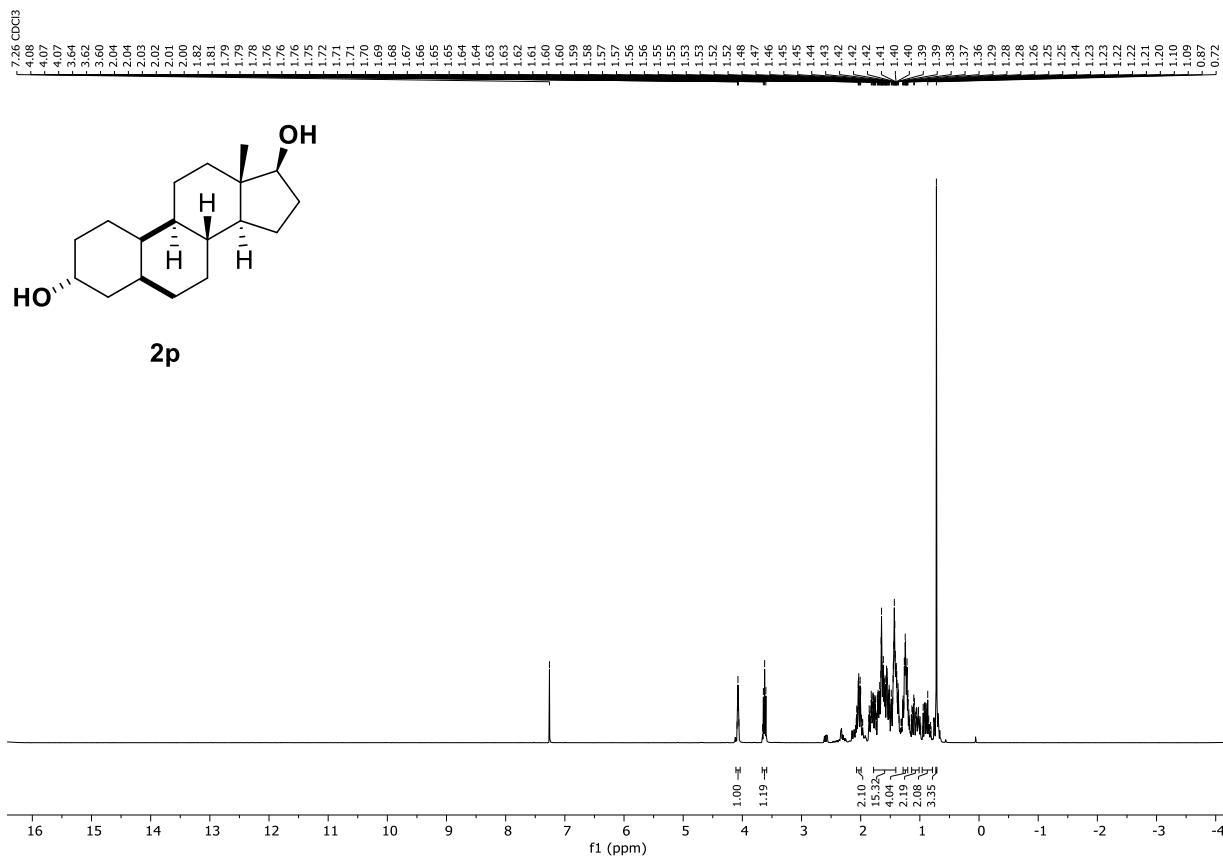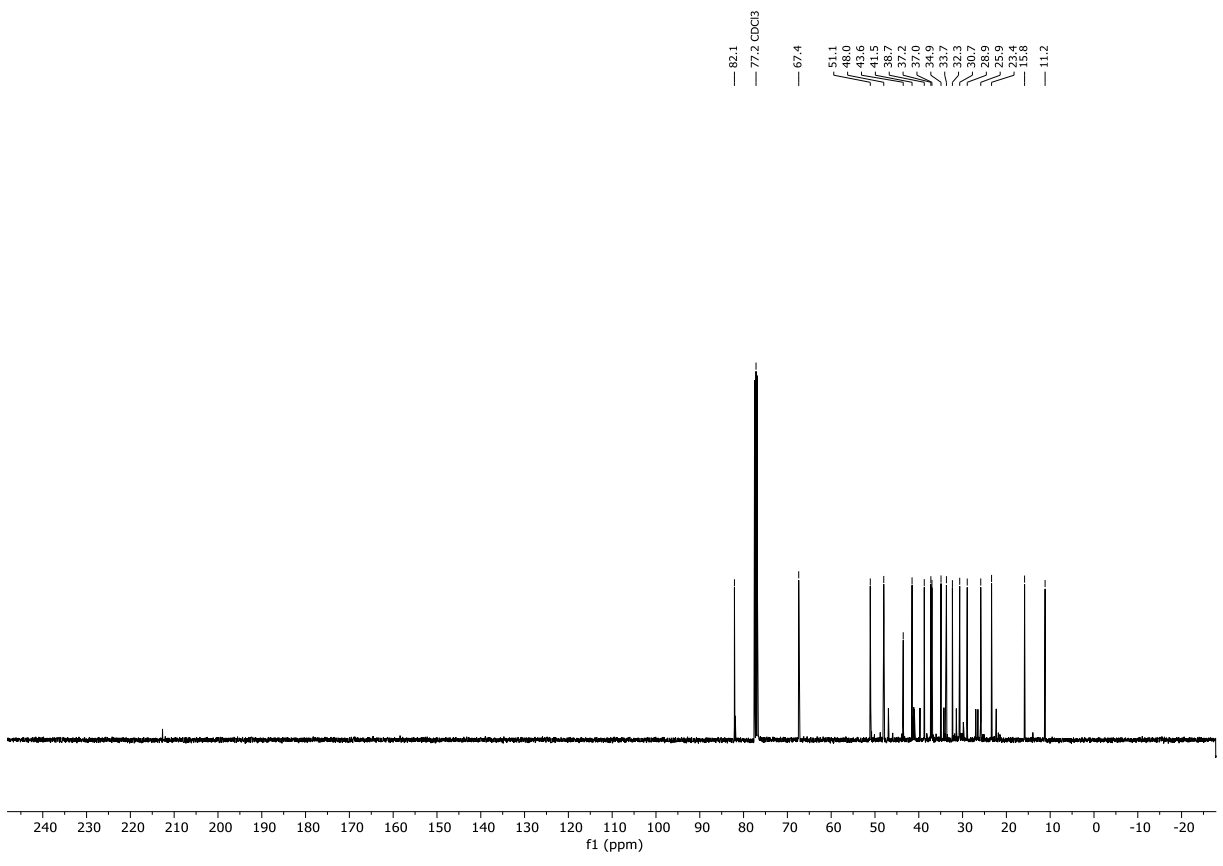

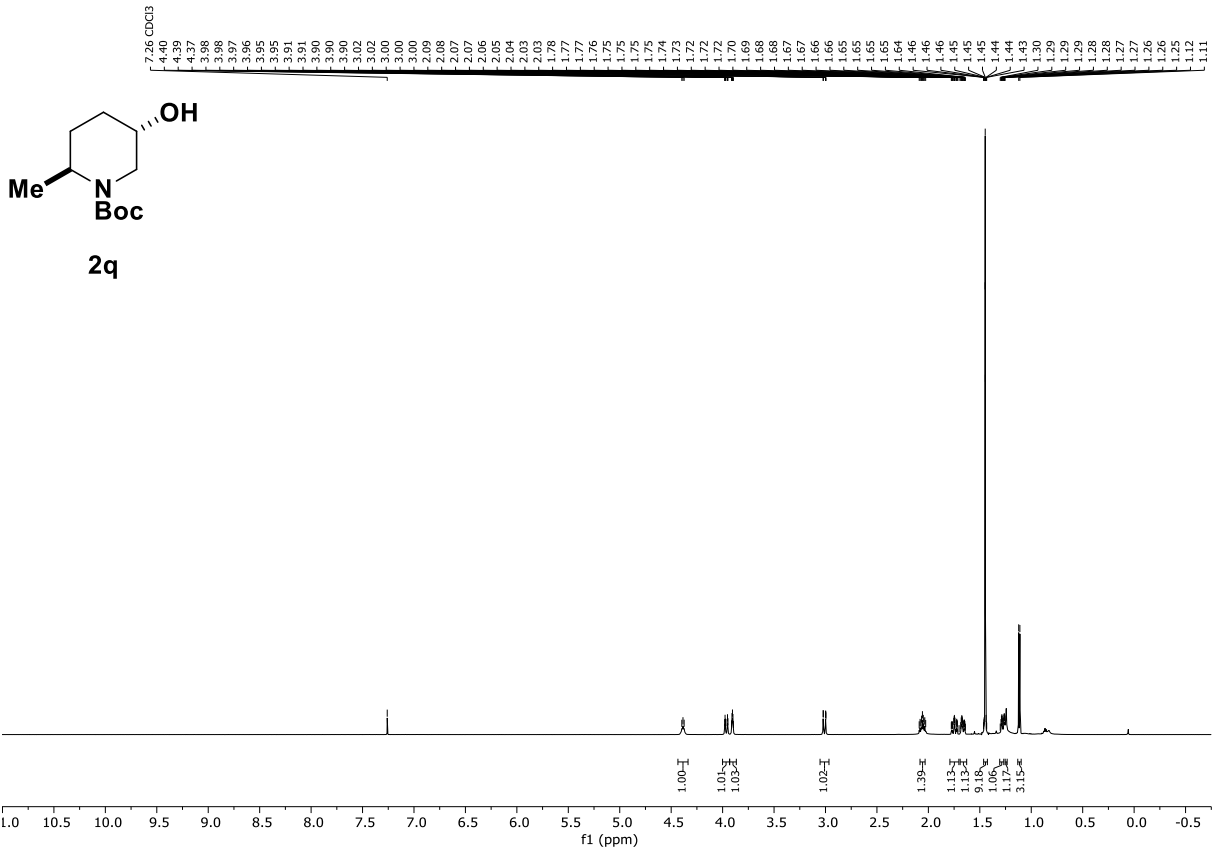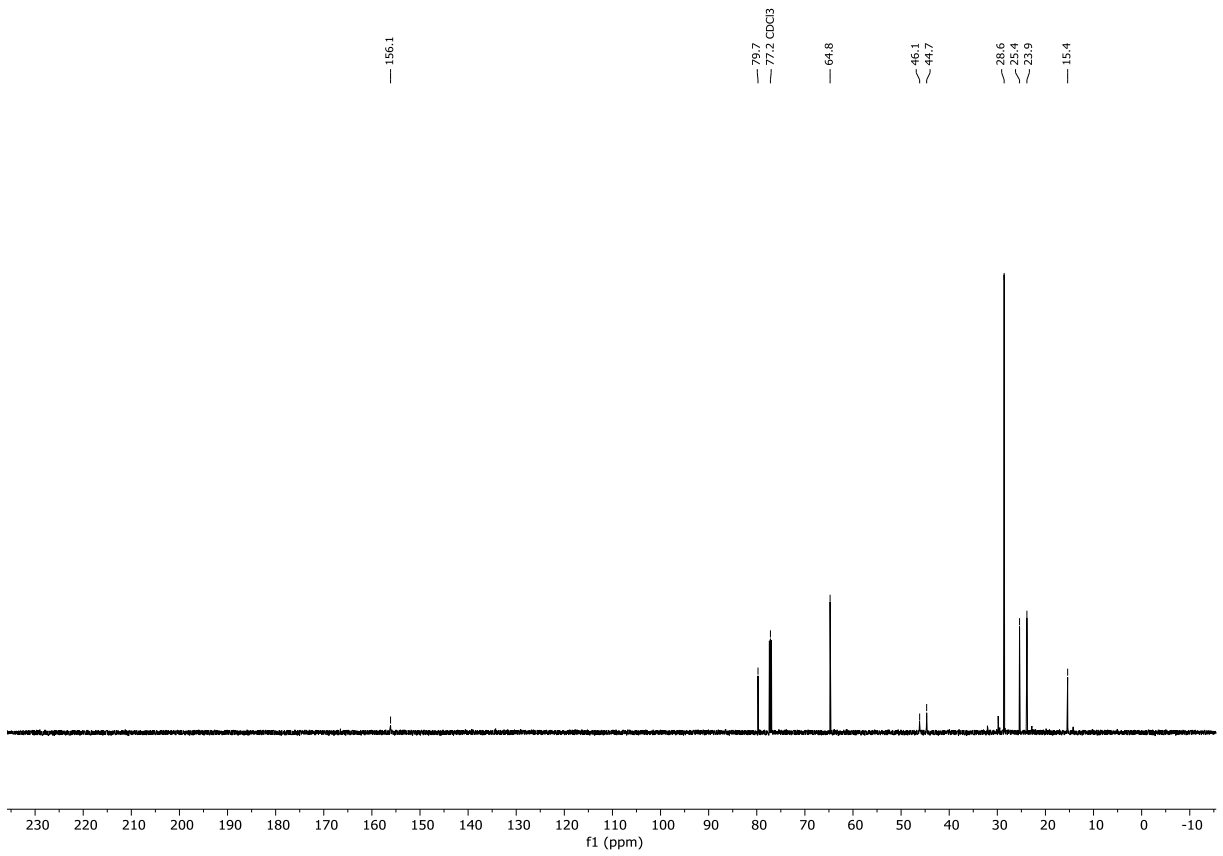

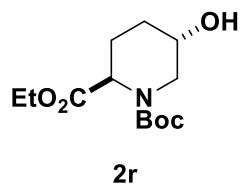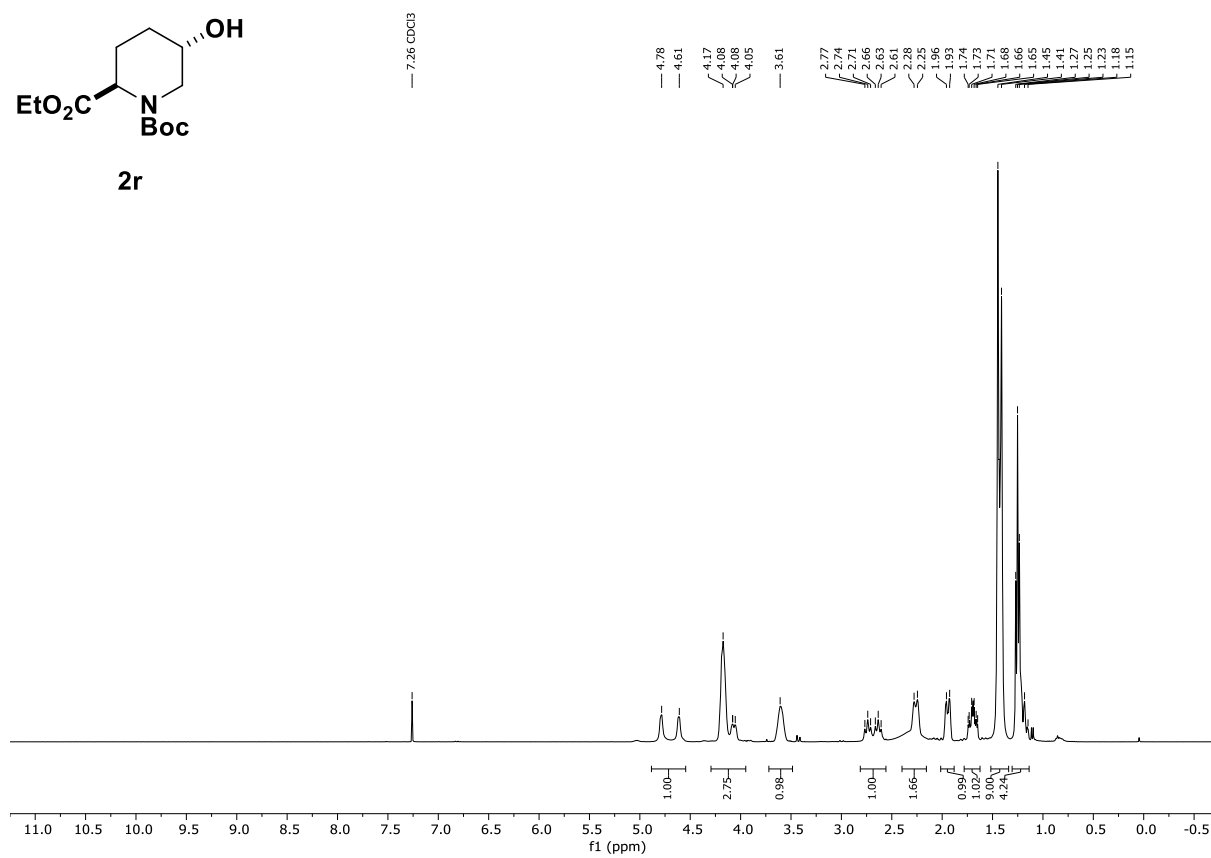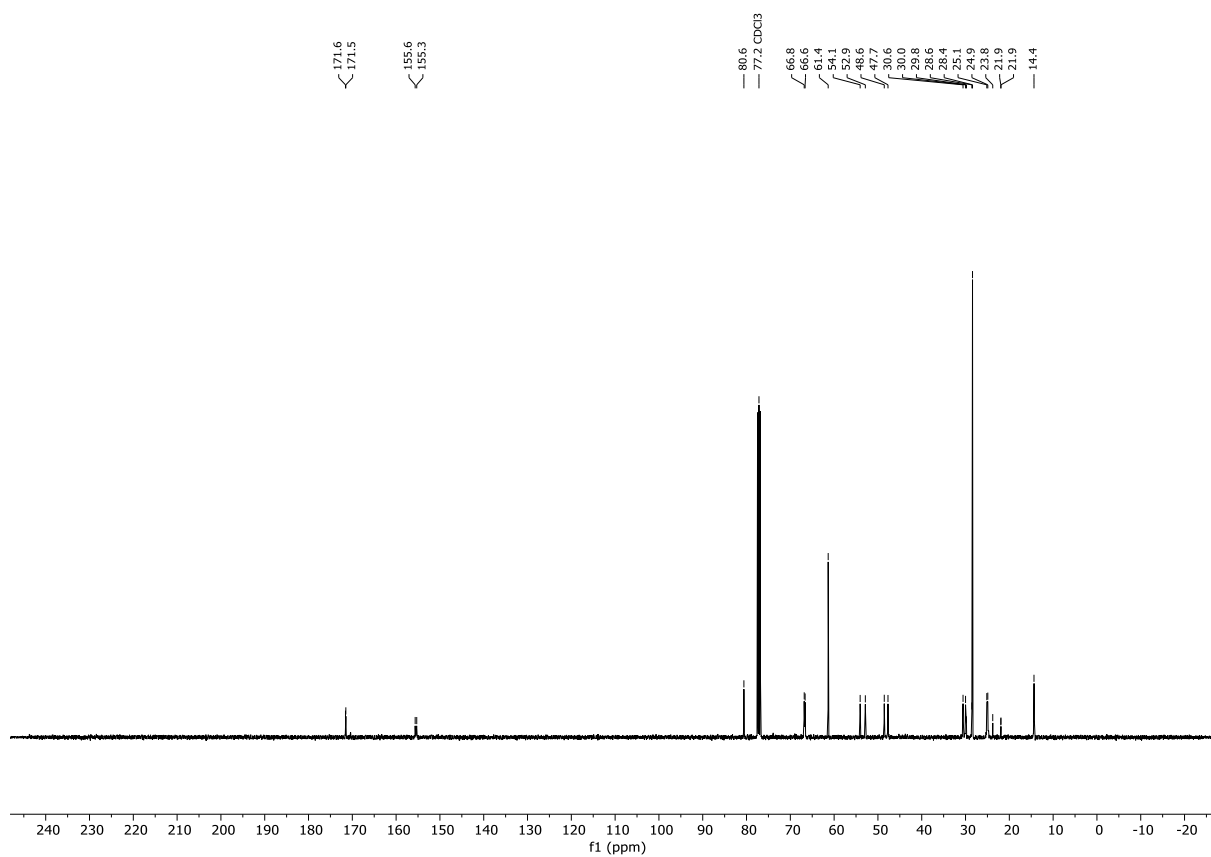

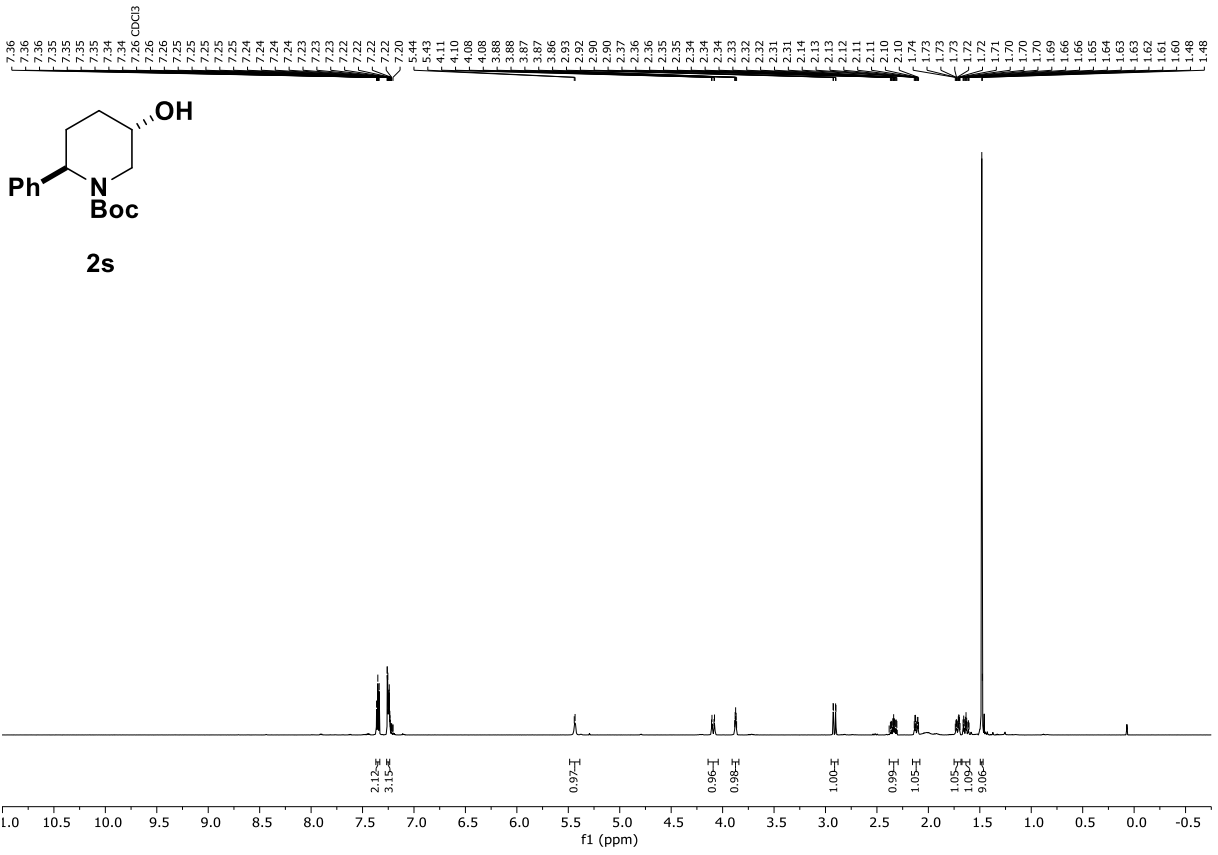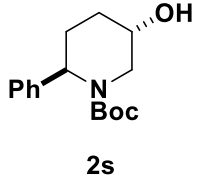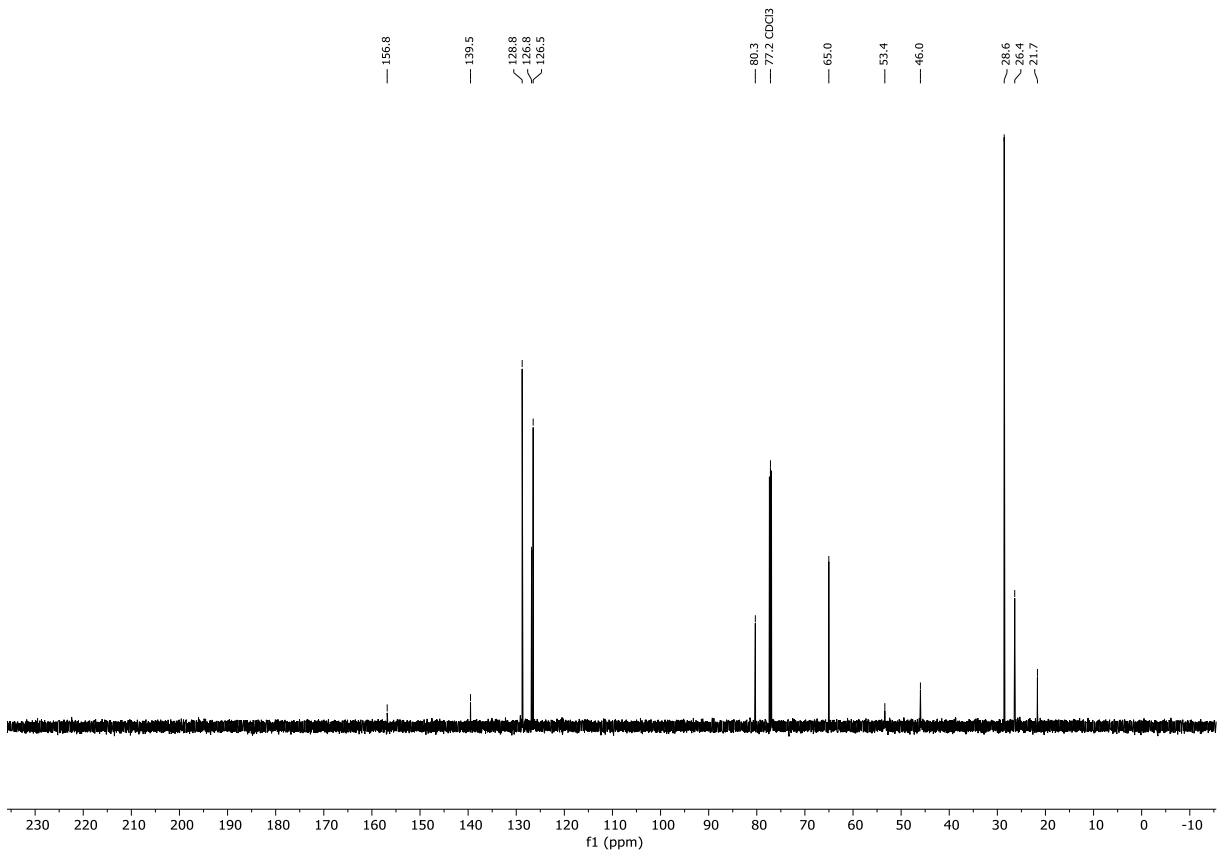

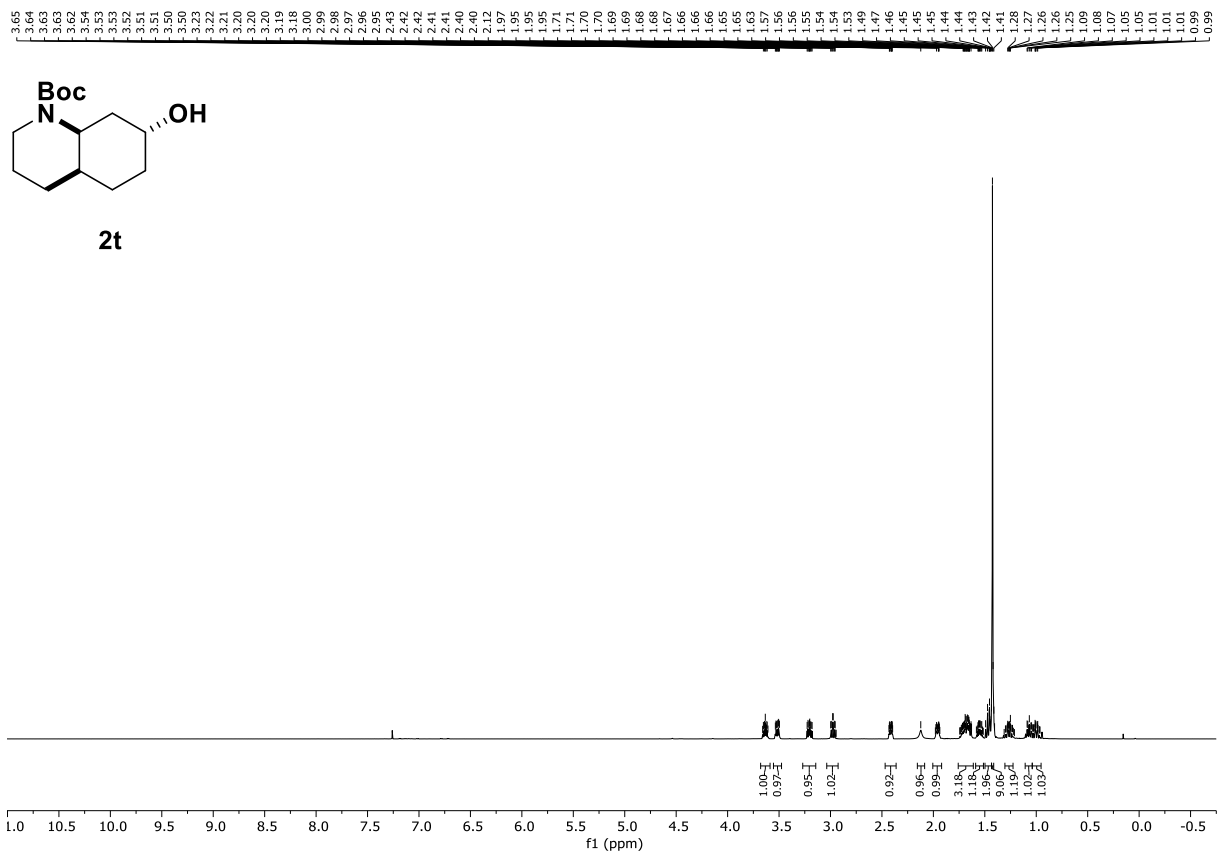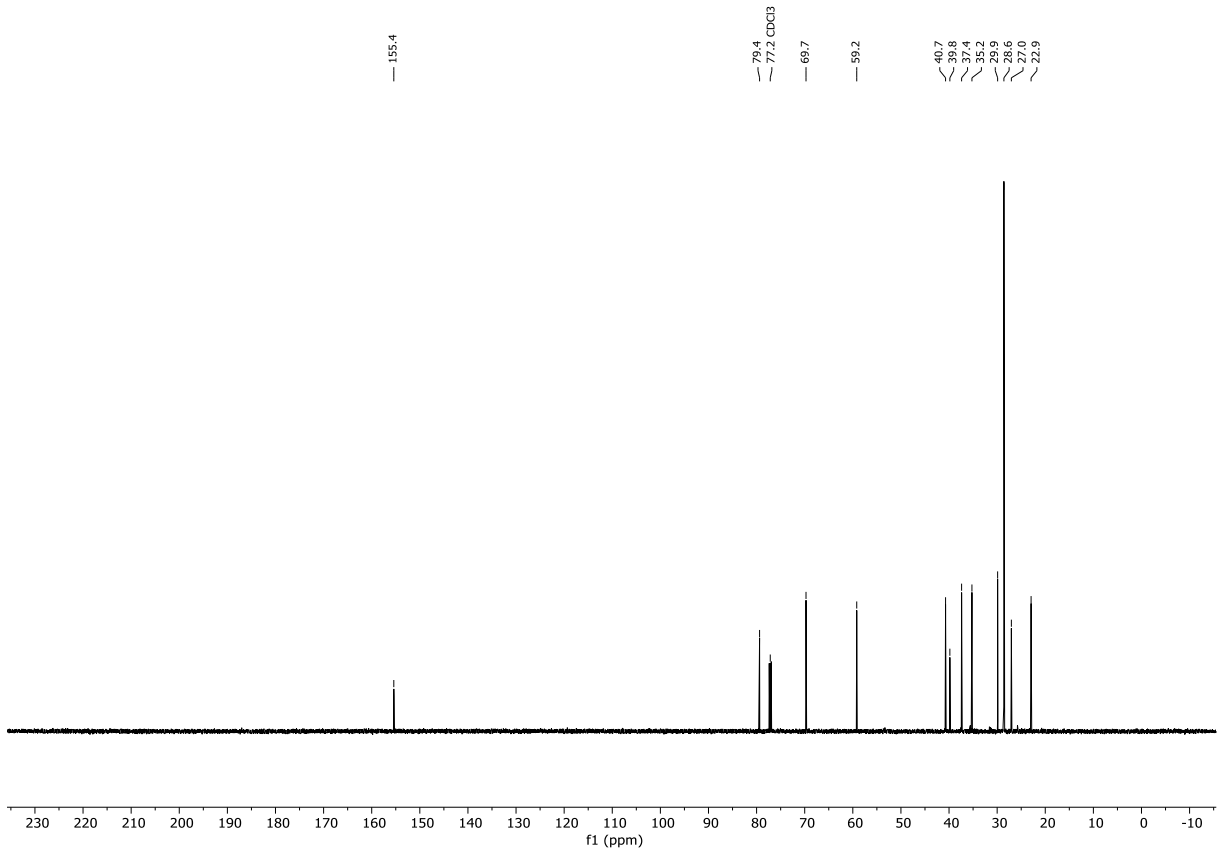

## 11.2 *cis*-Cyclohexanols

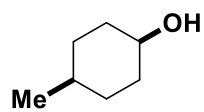

3a

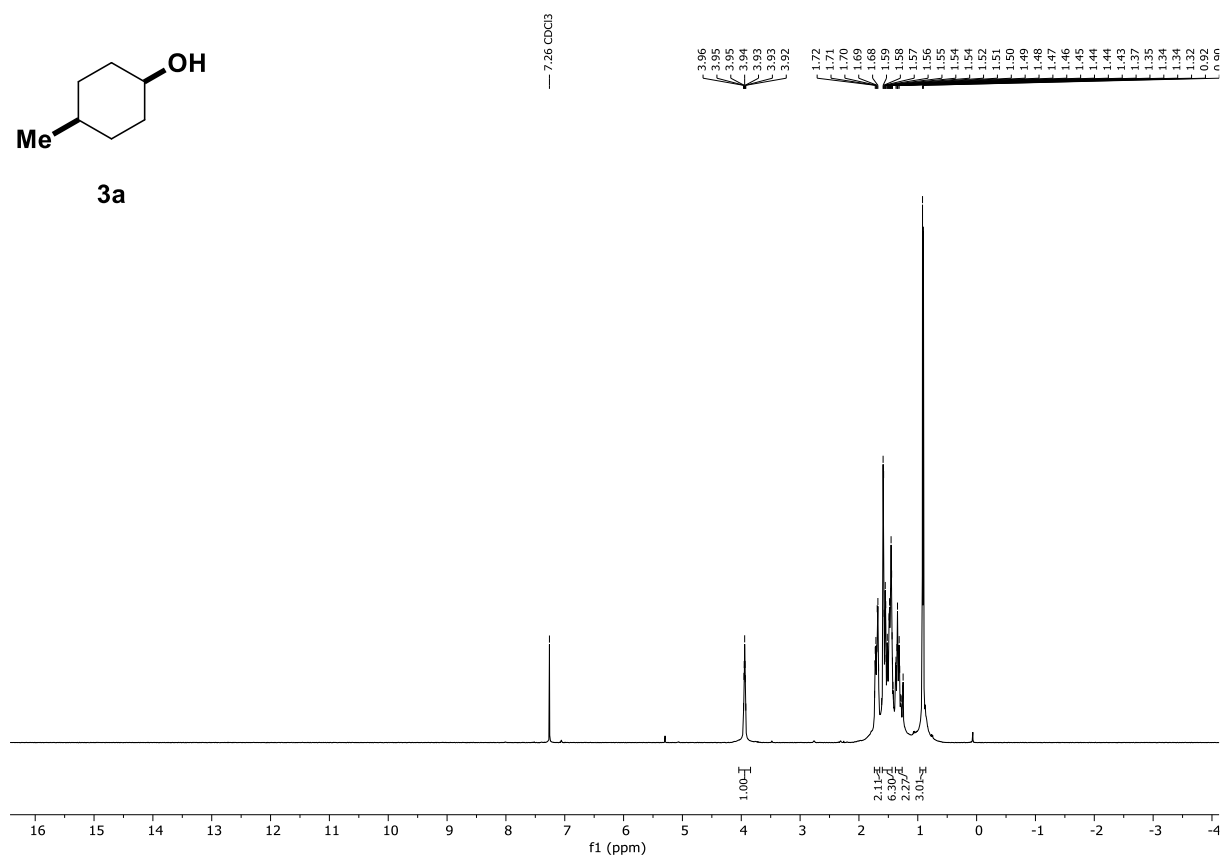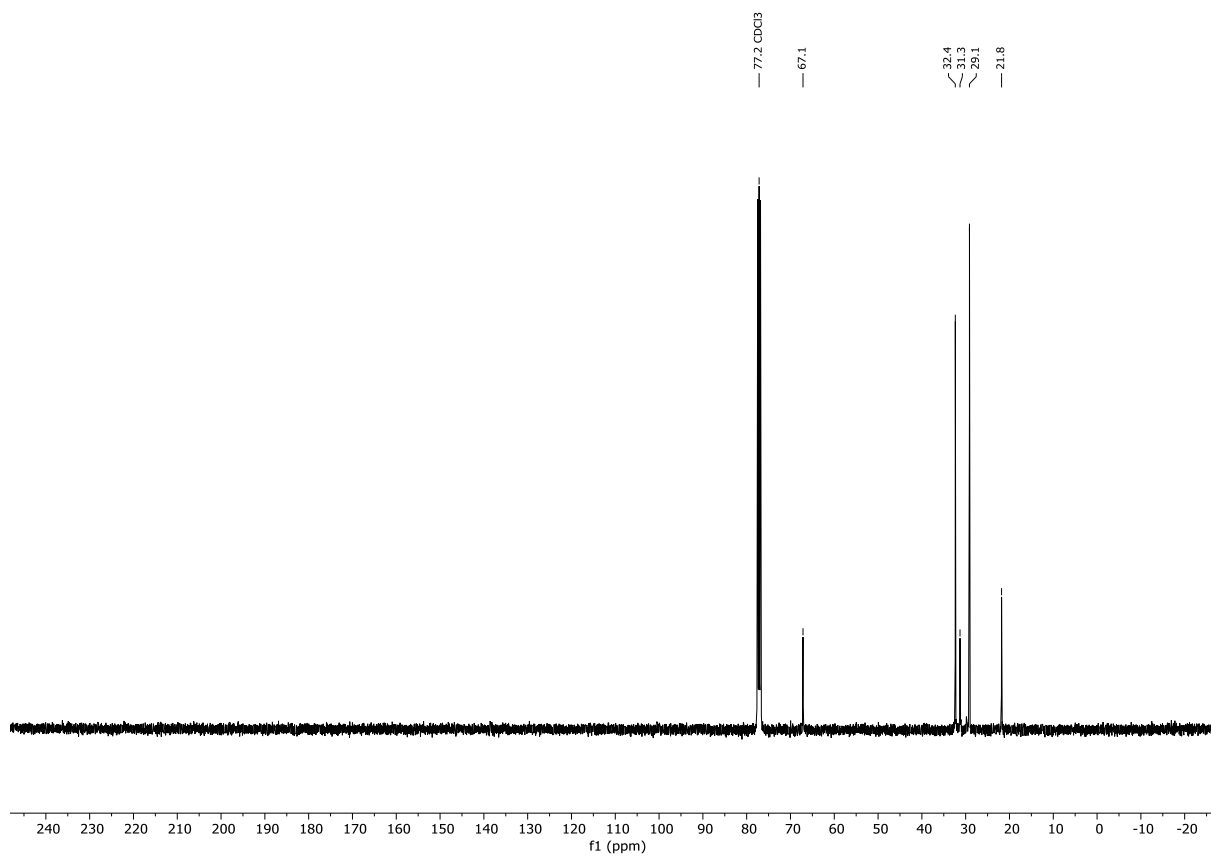

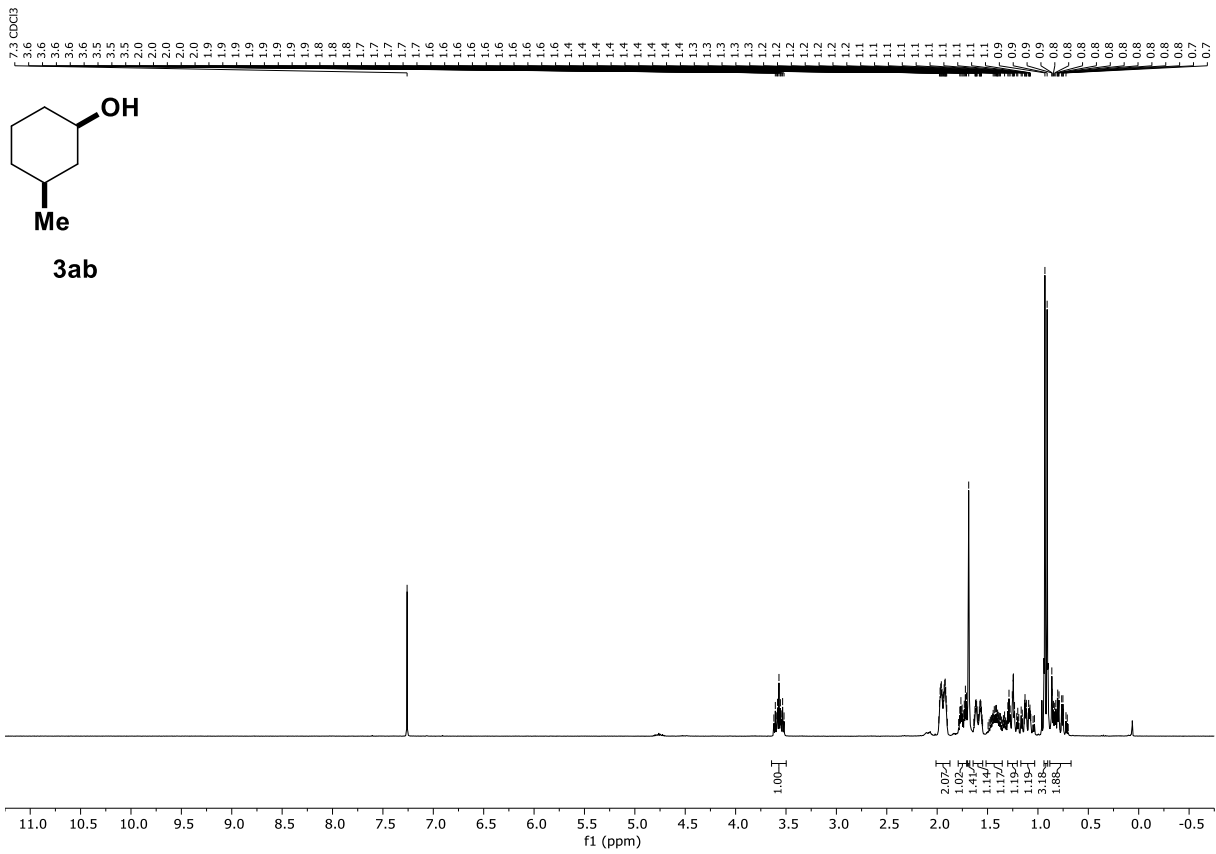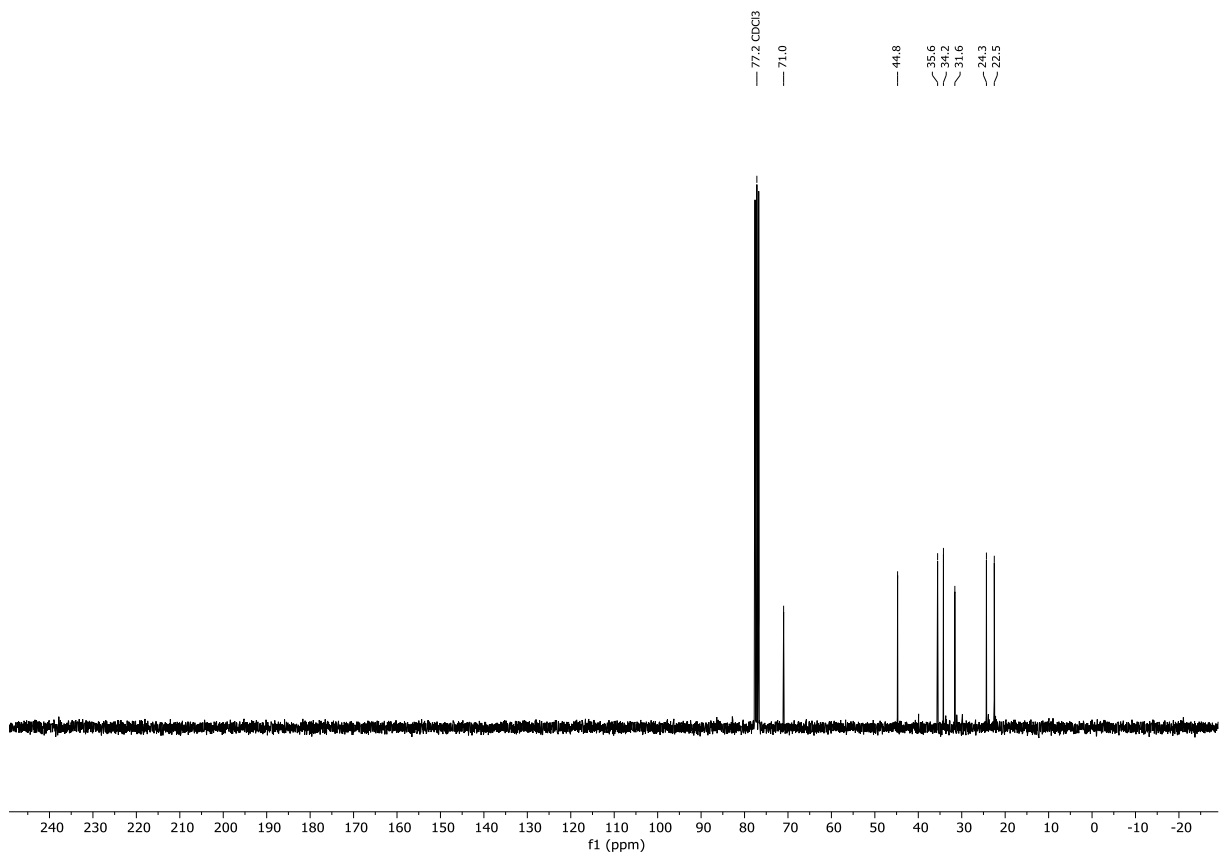



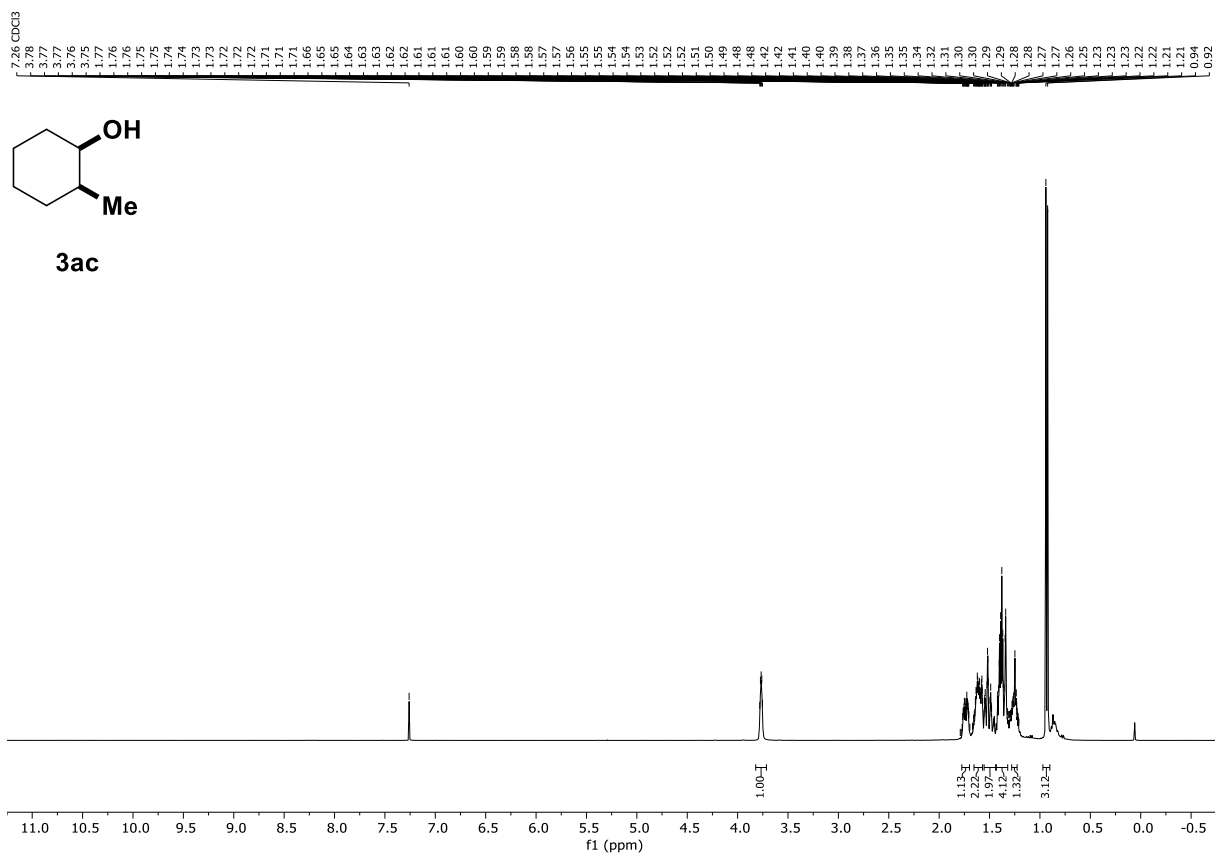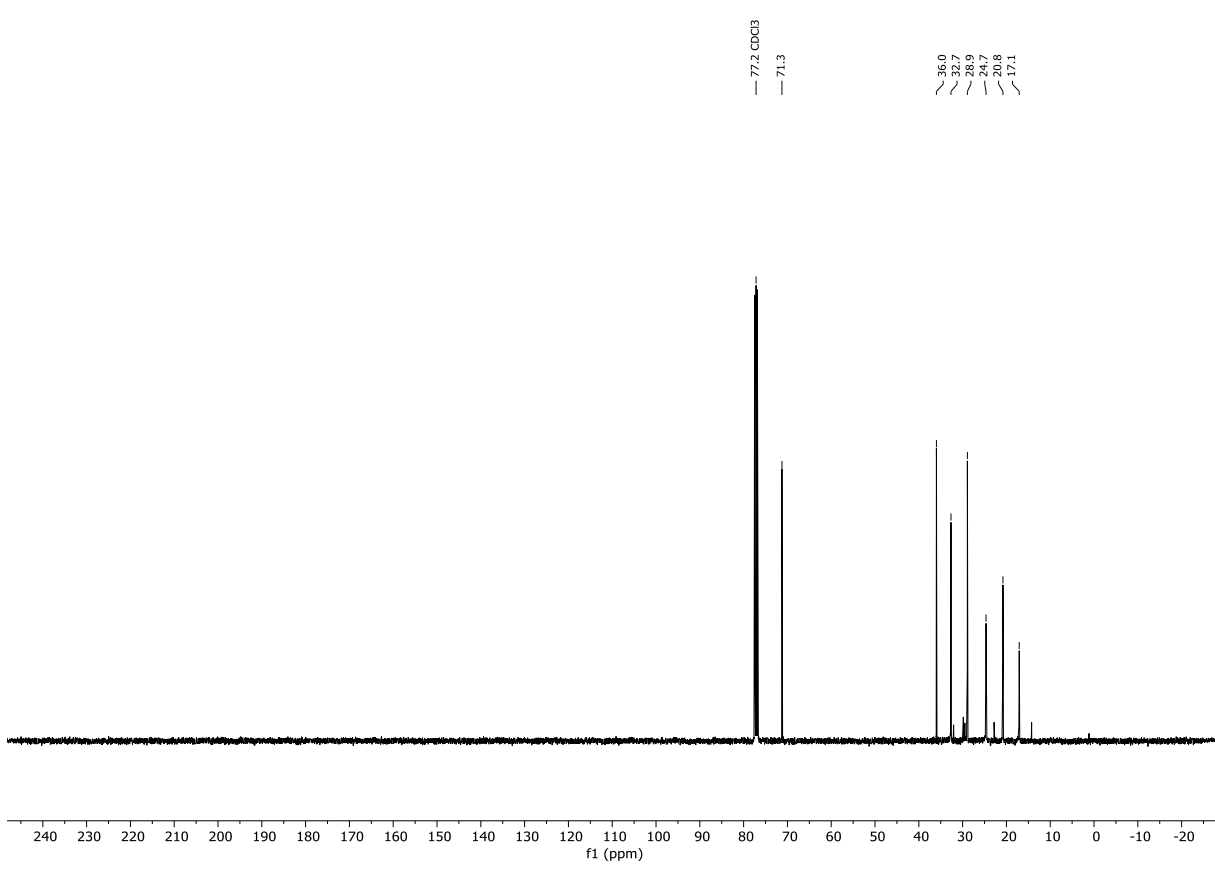

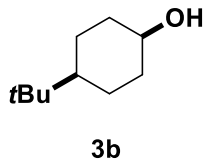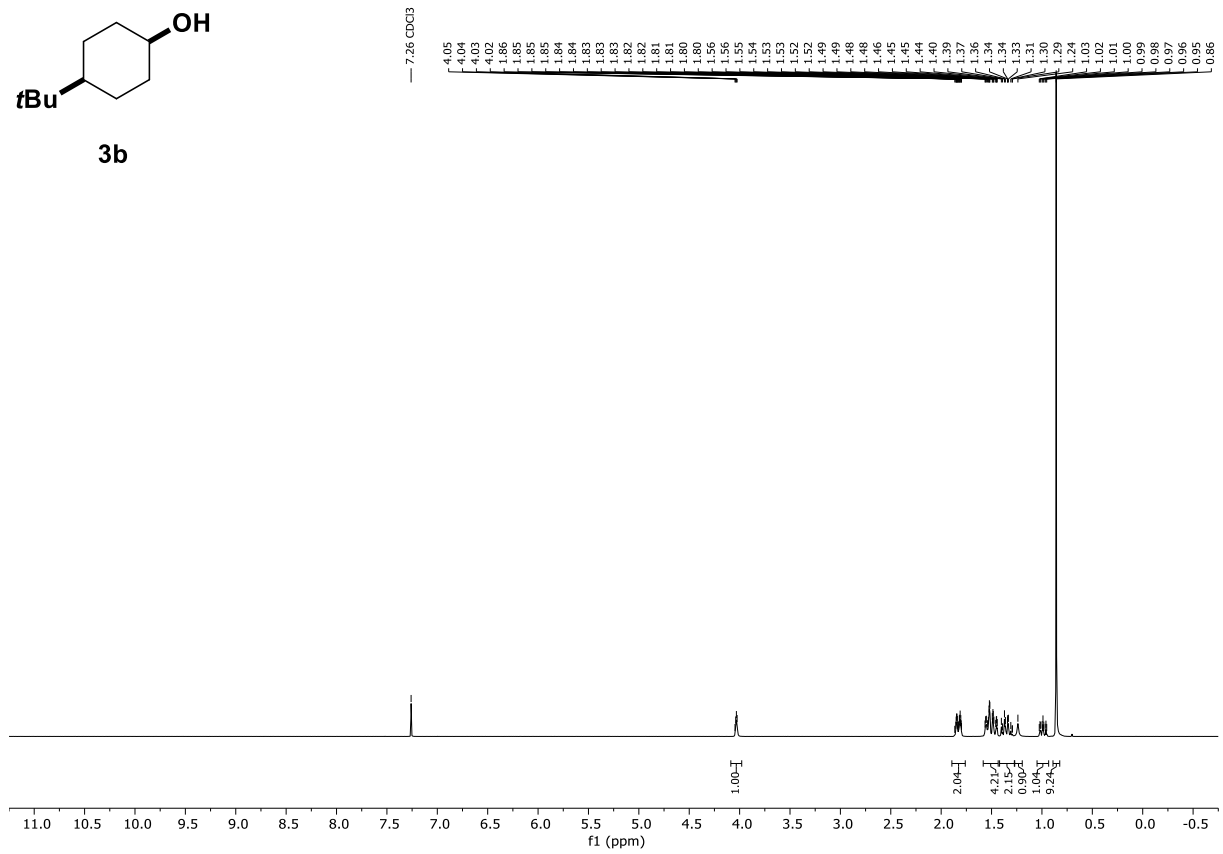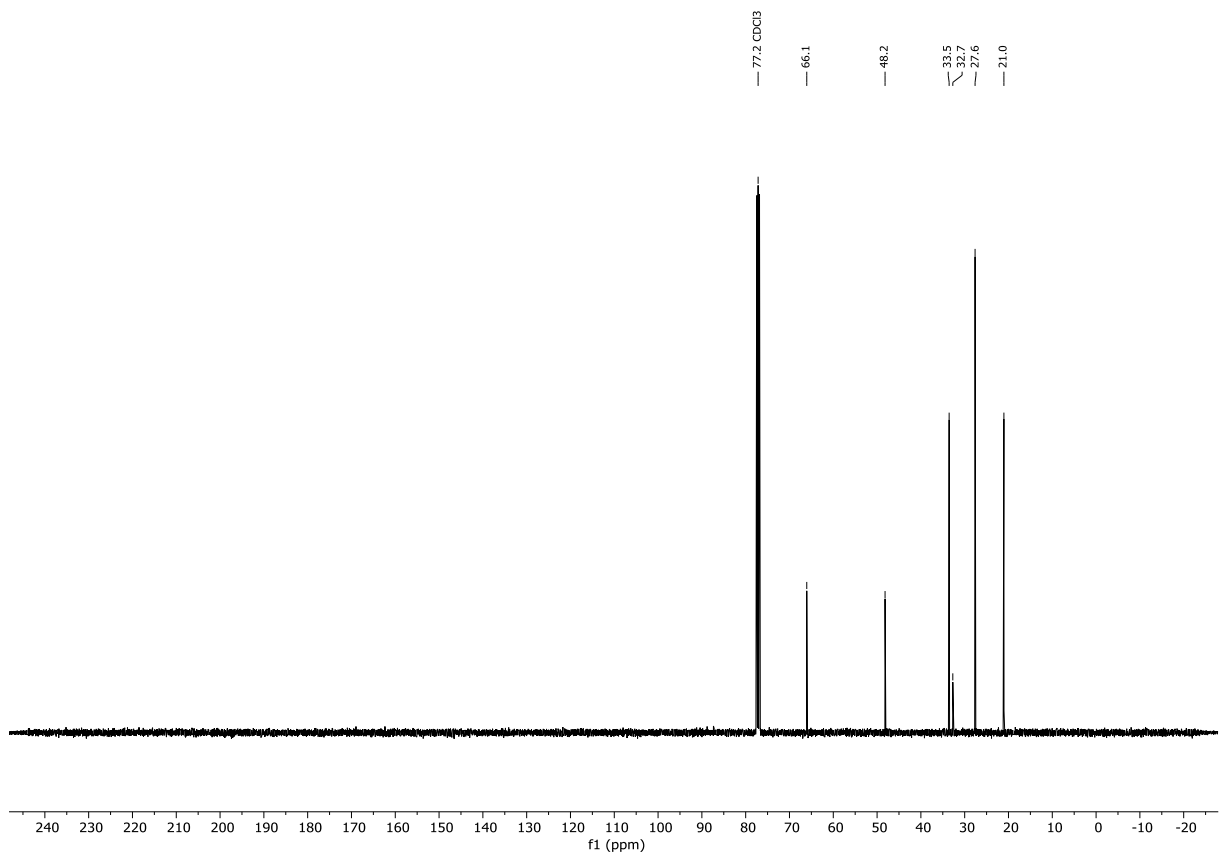

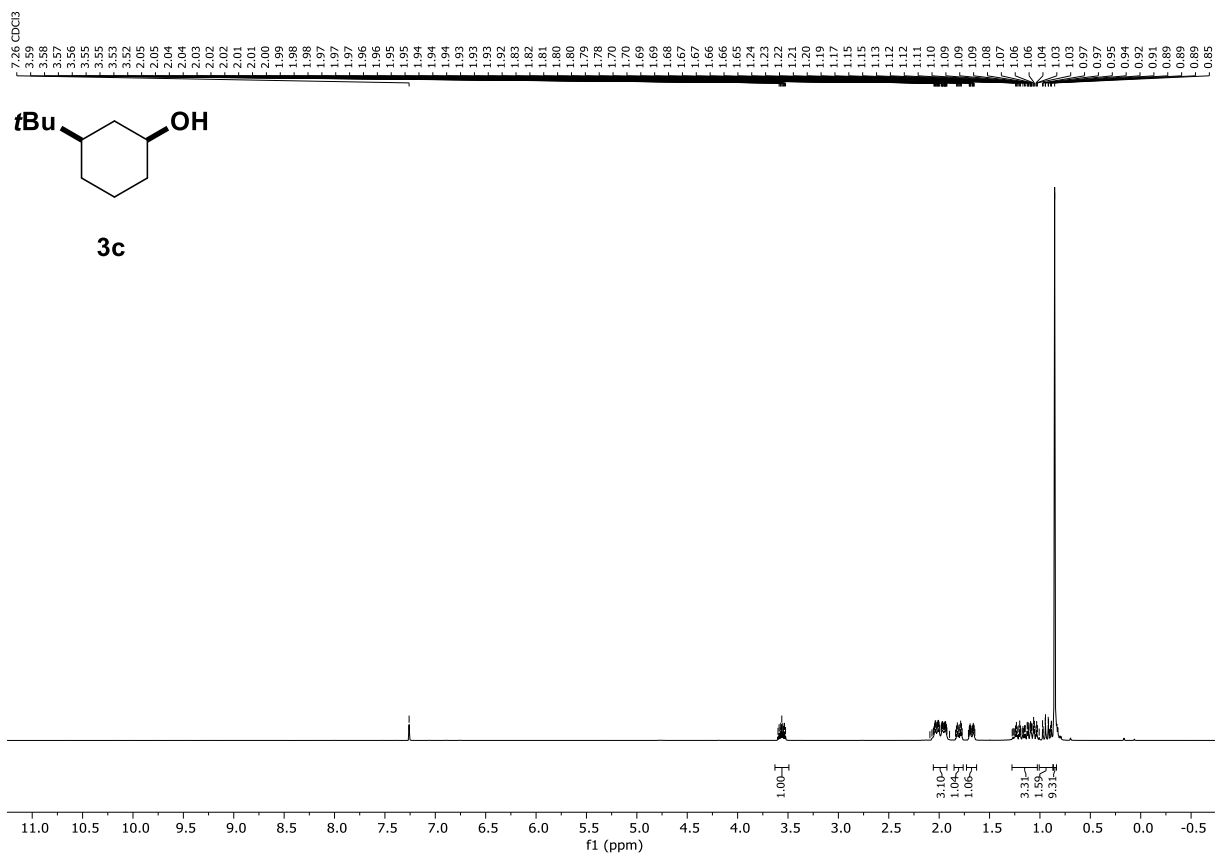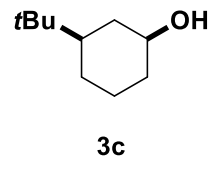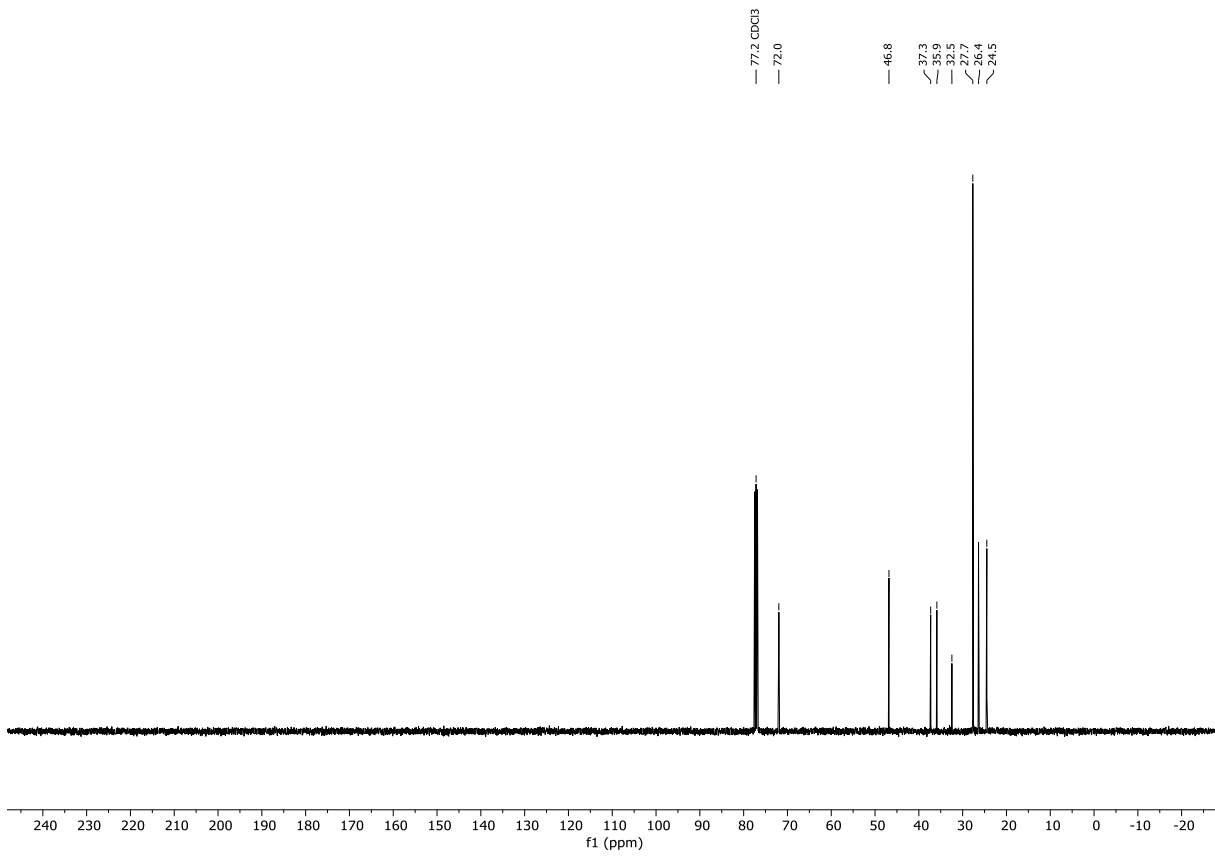

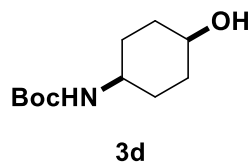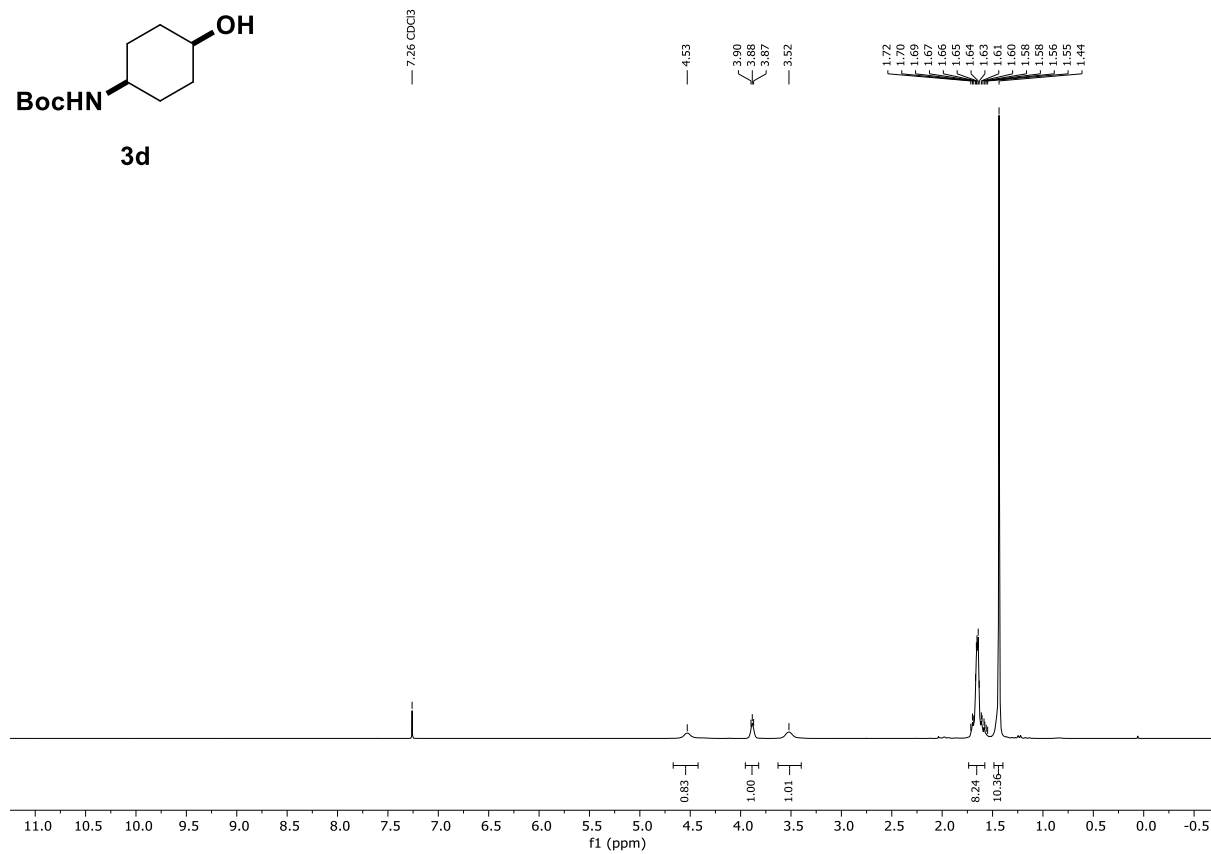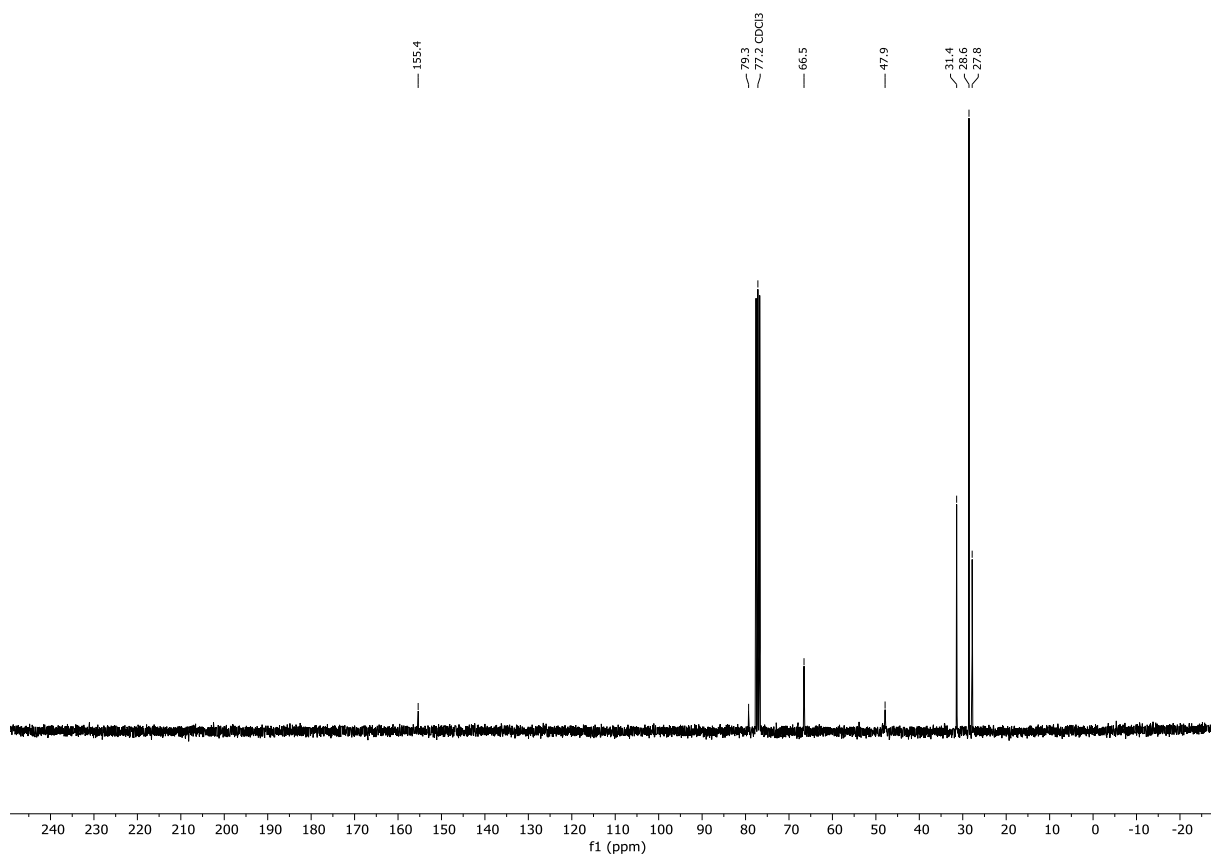

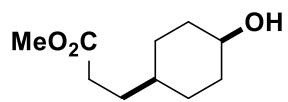

3e

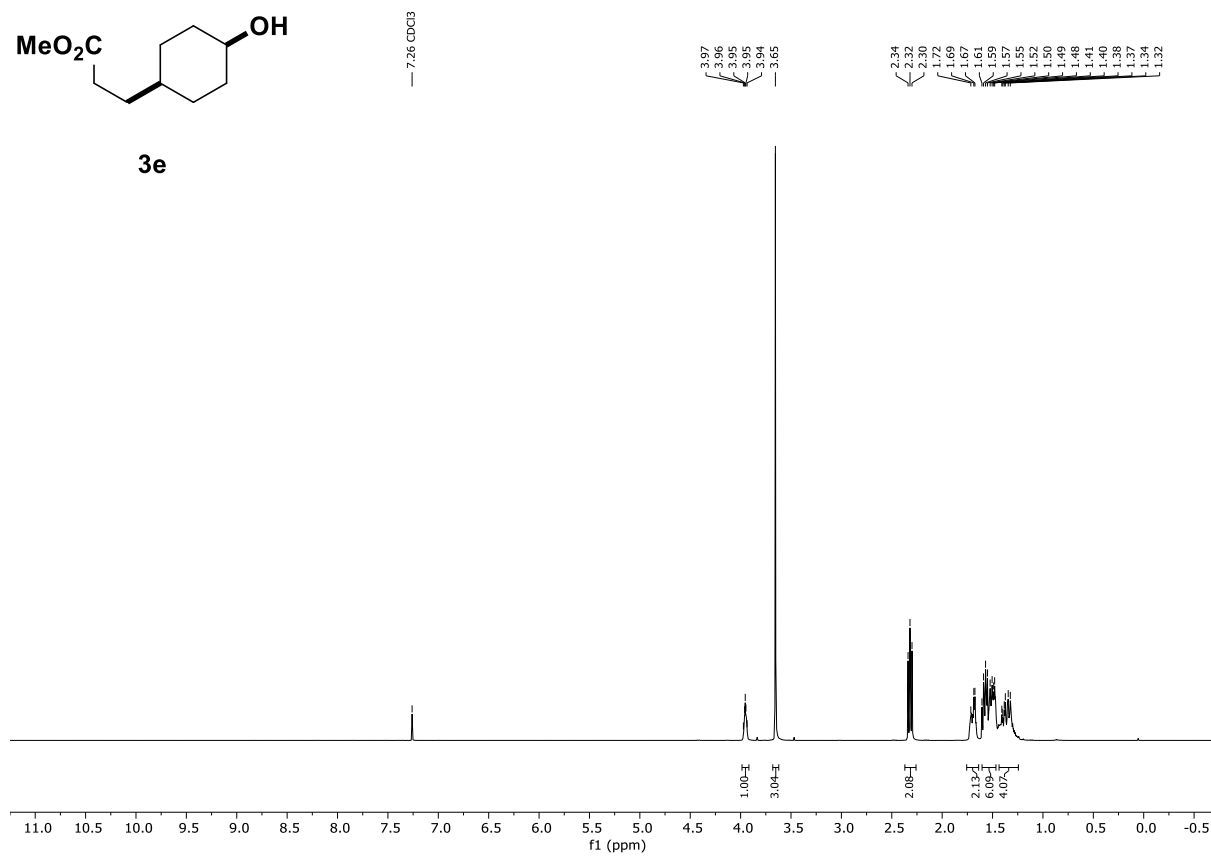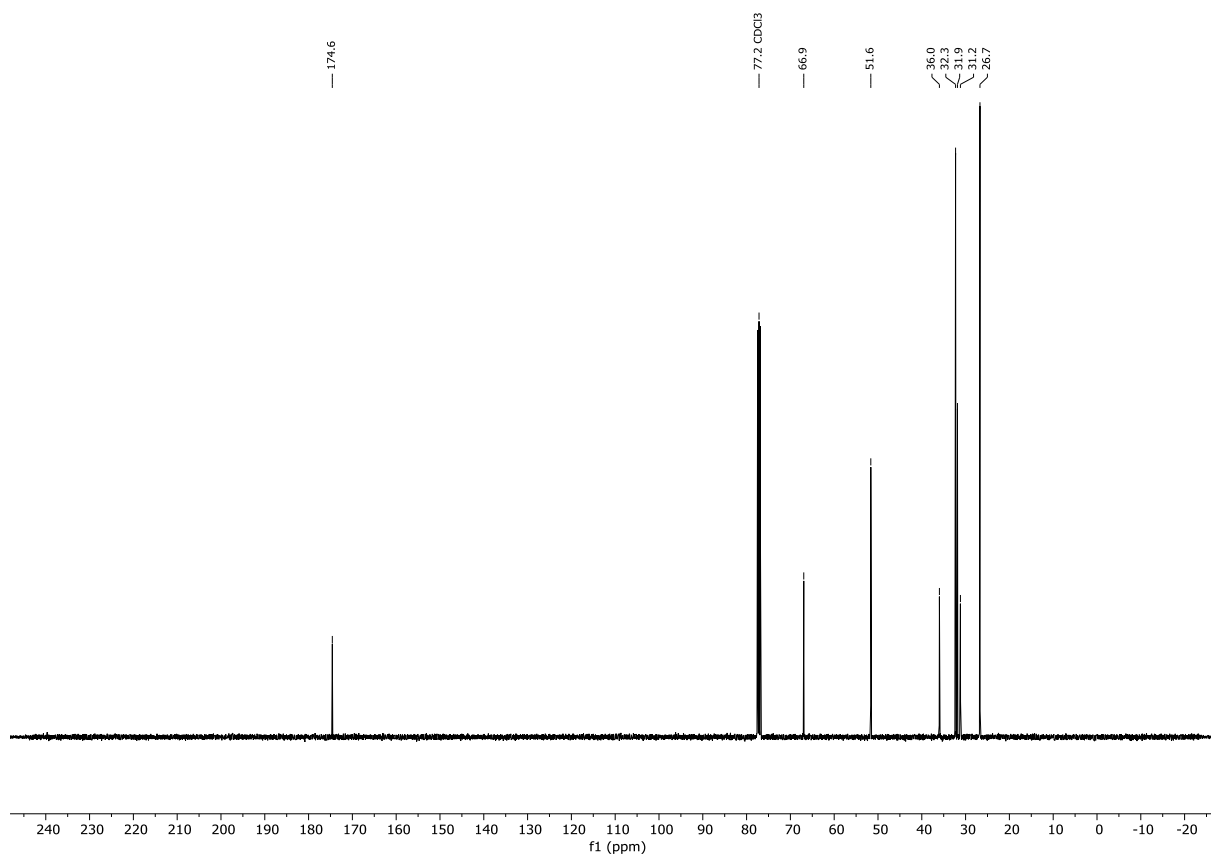

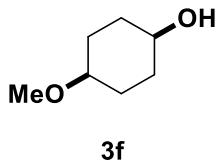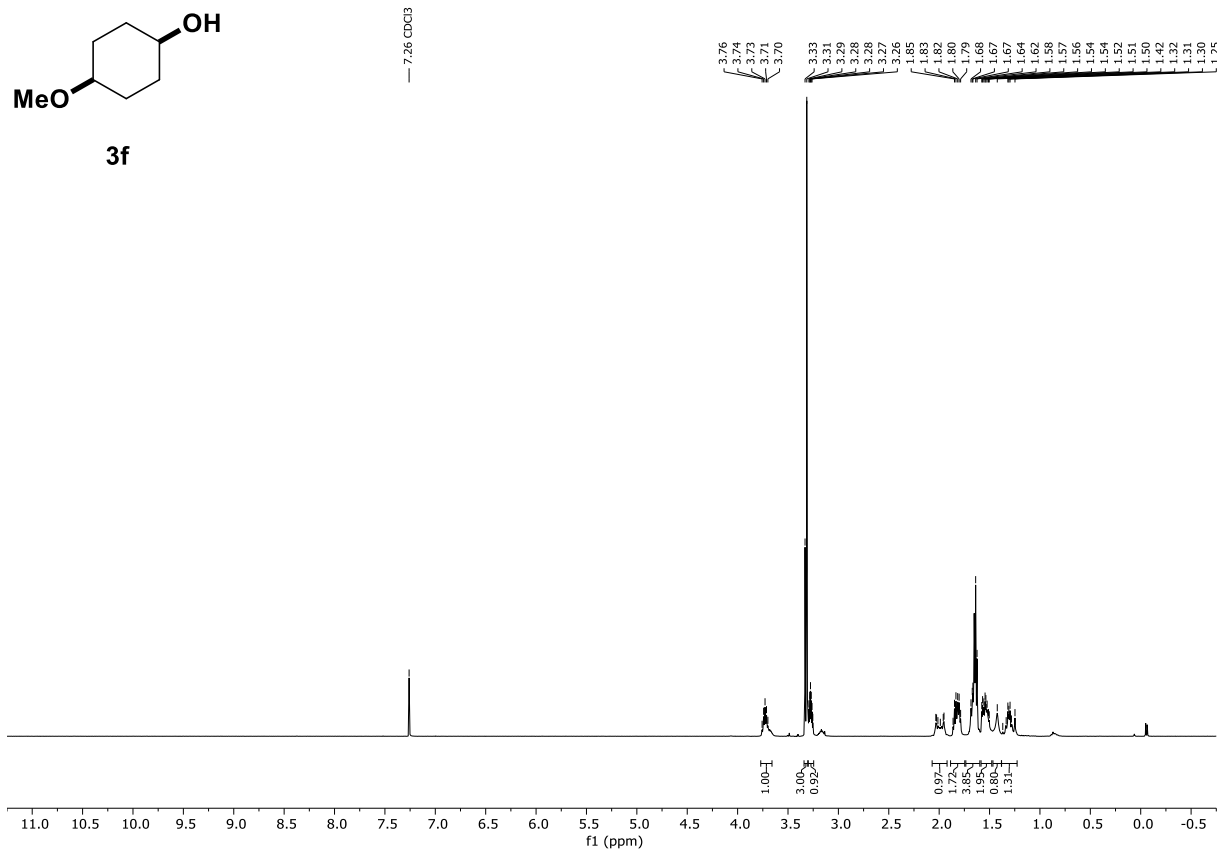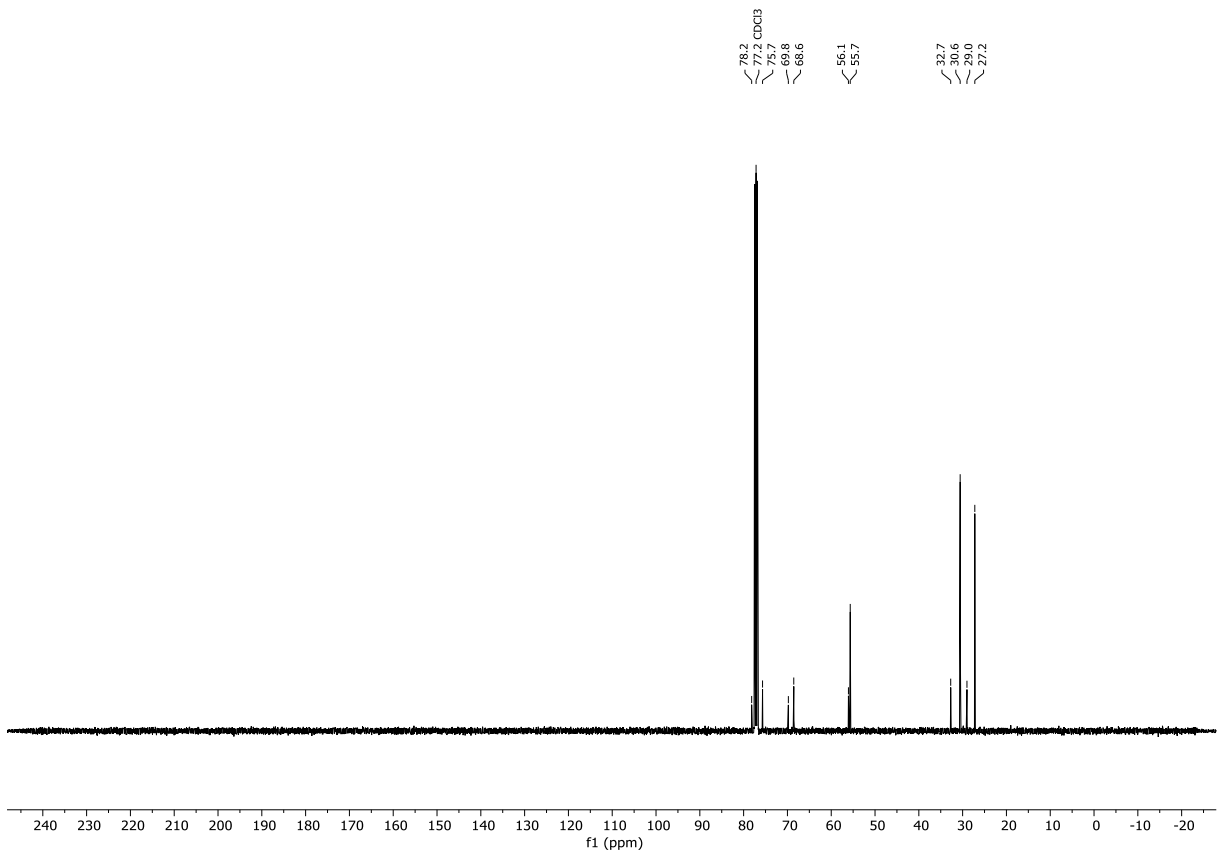

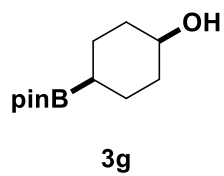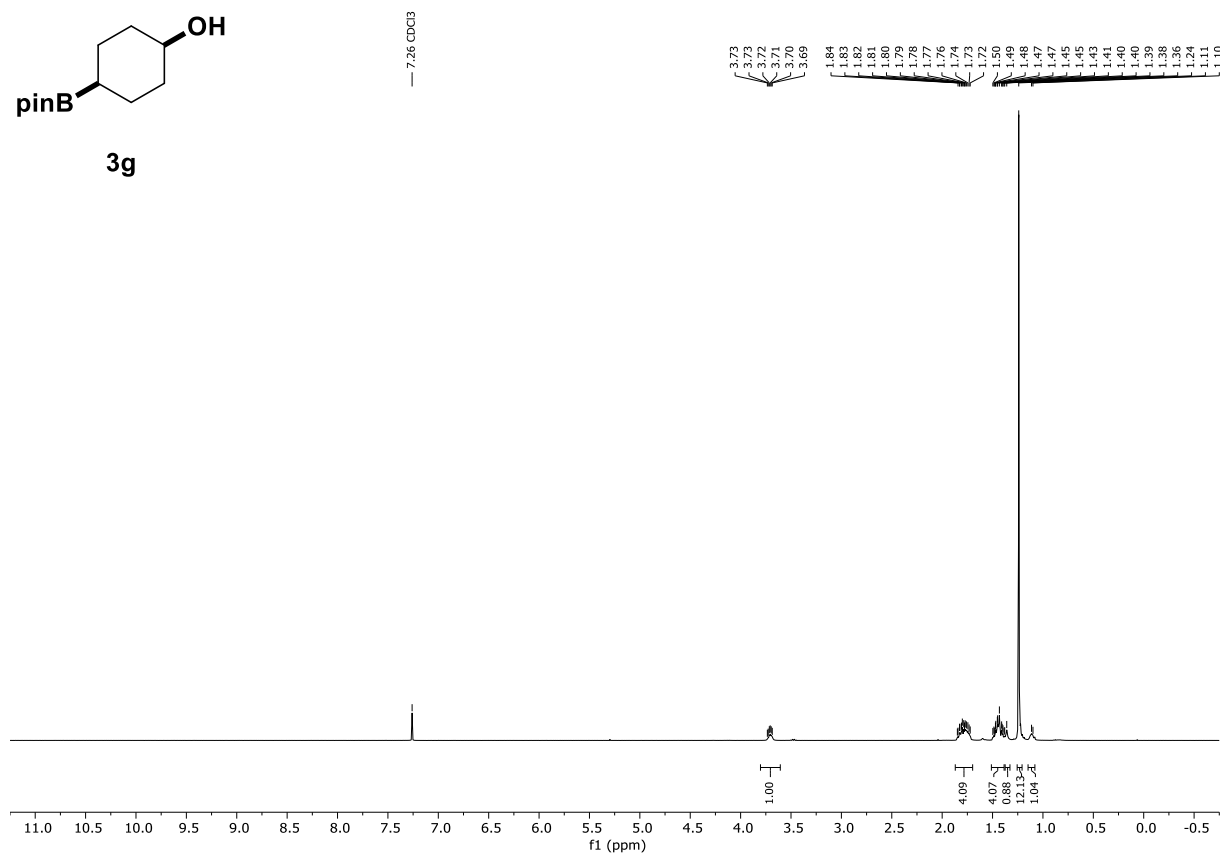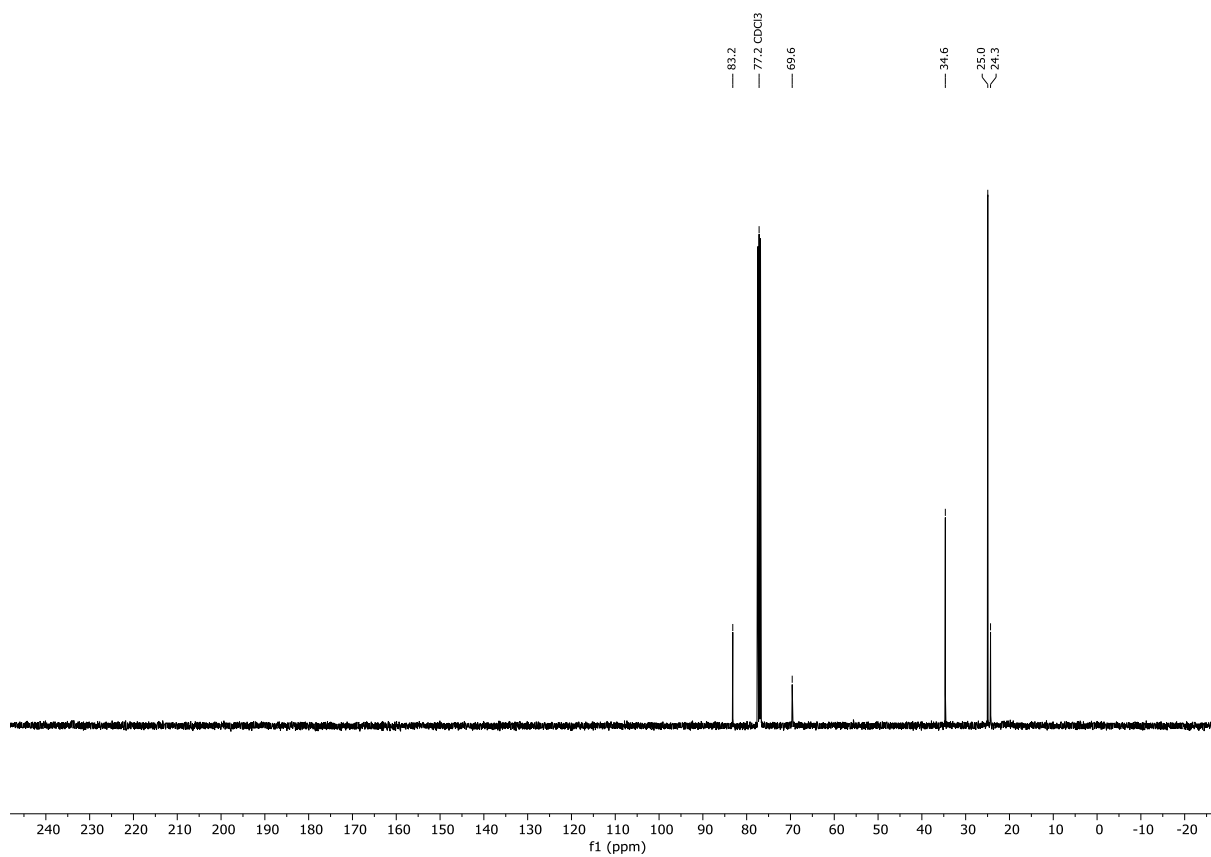

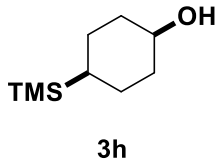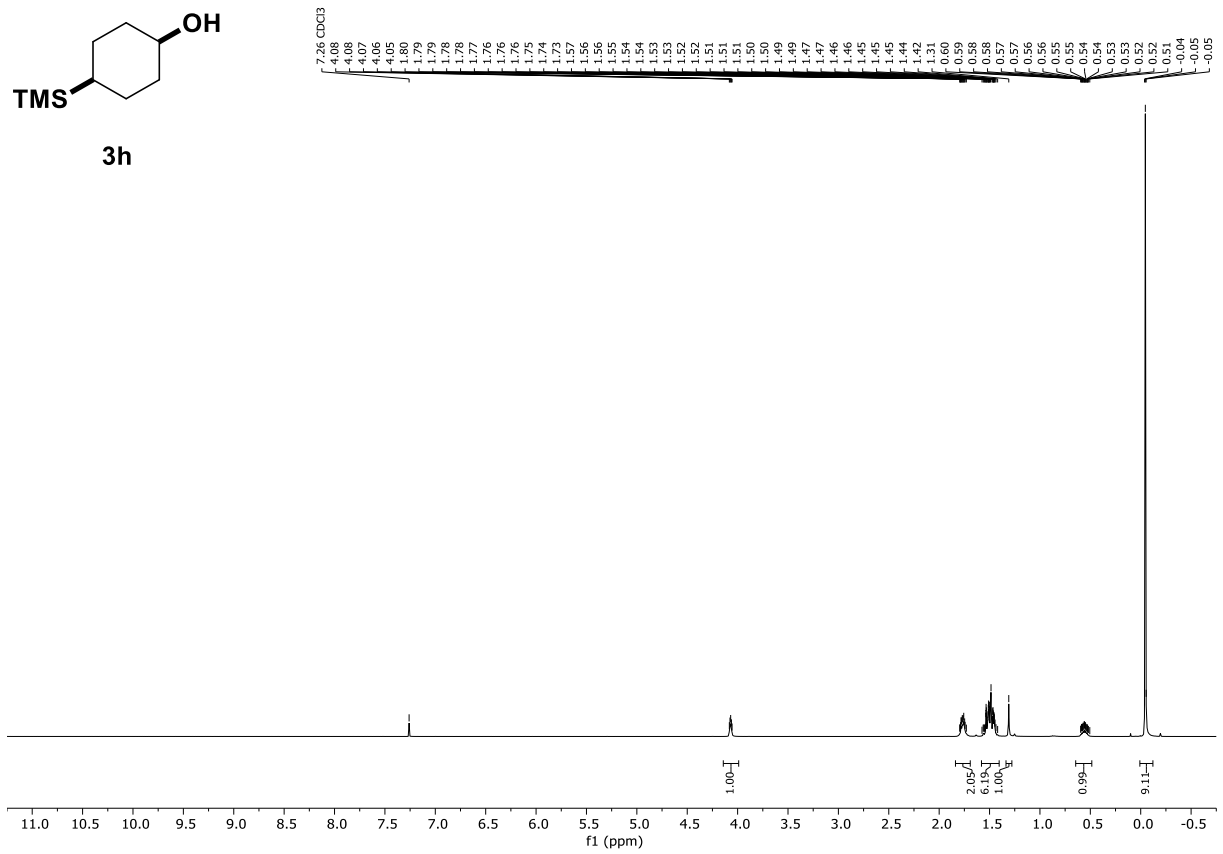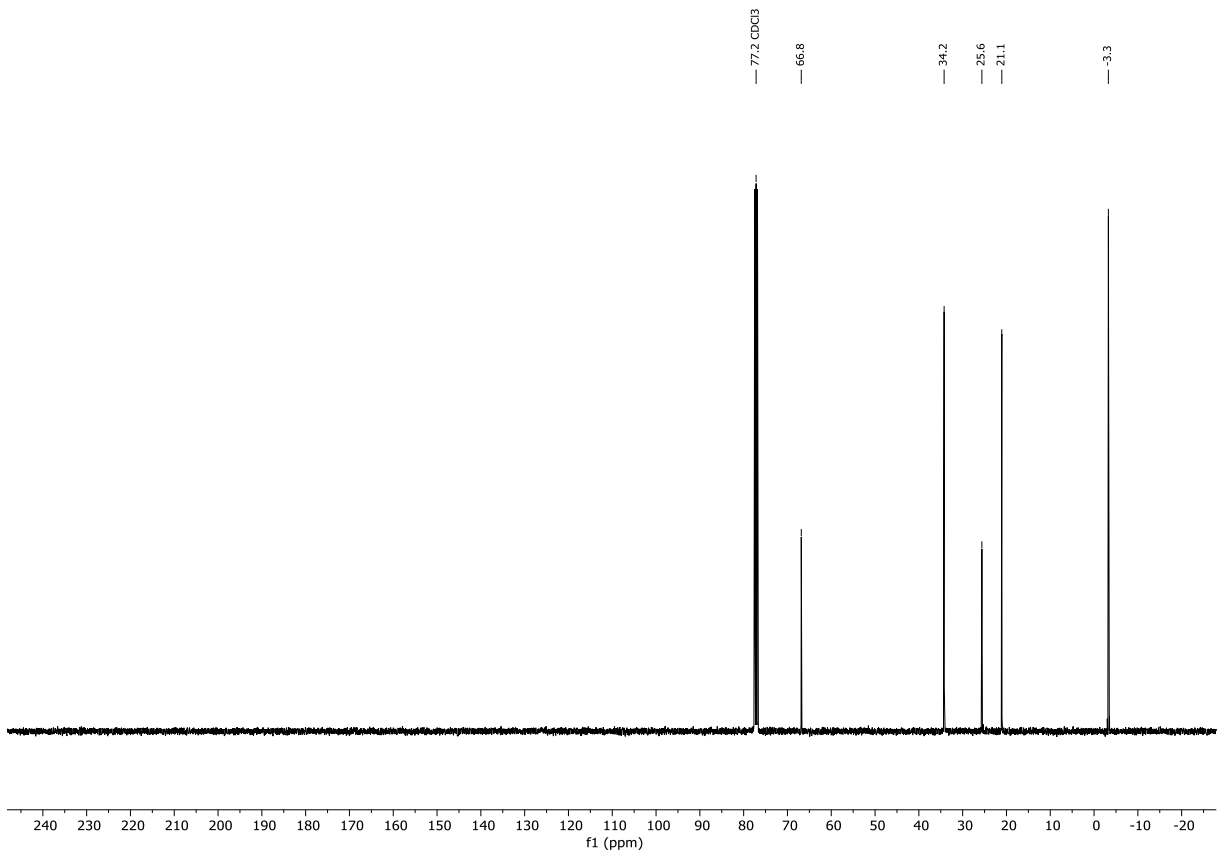



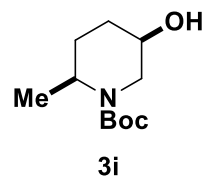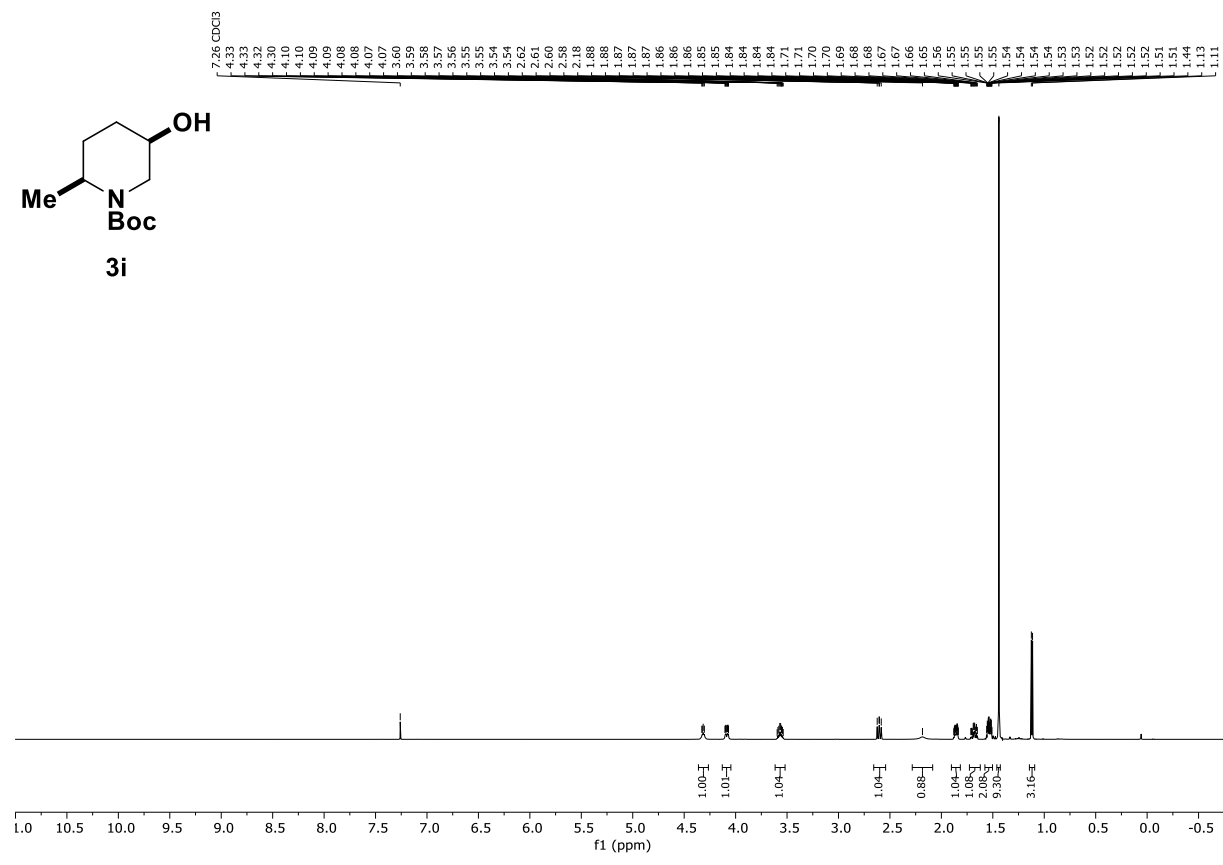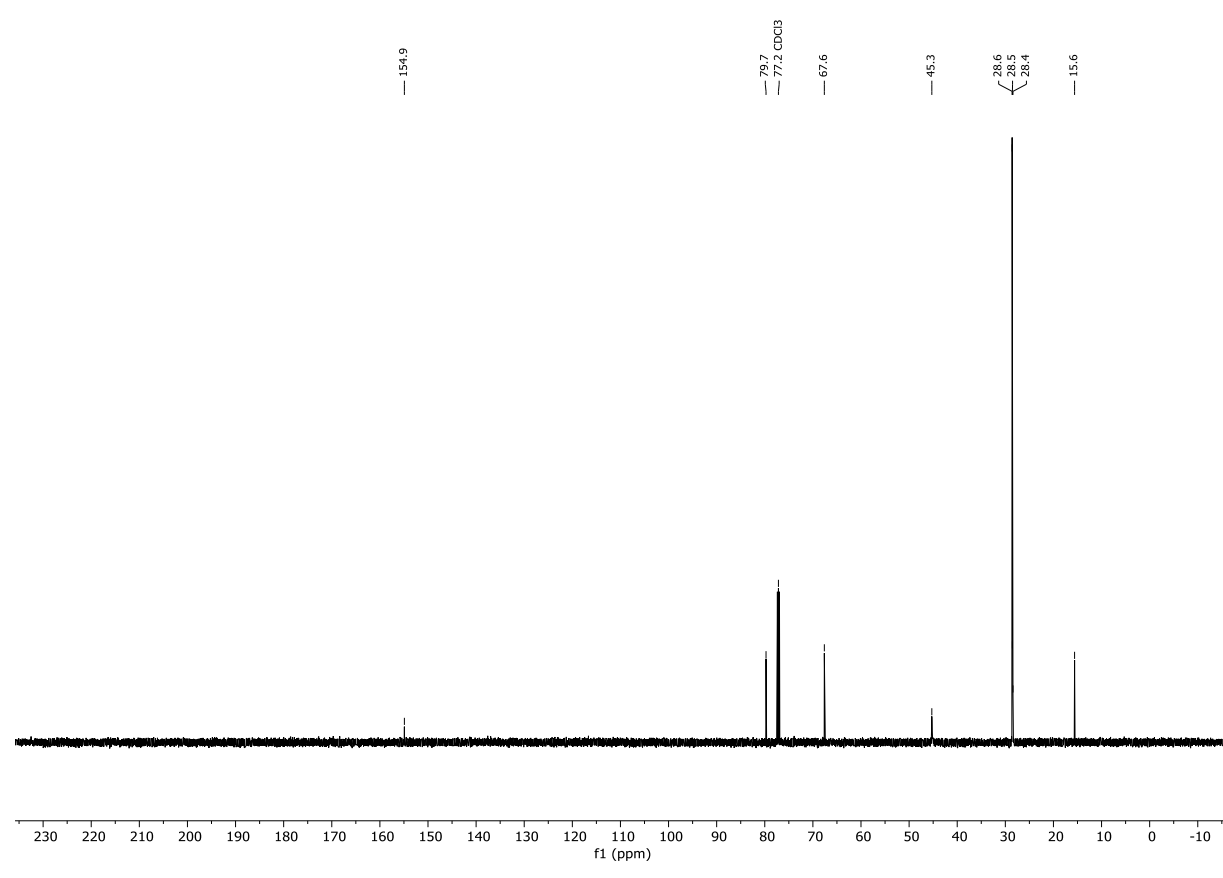

### 11.3 Cyclohexanones

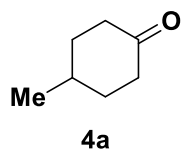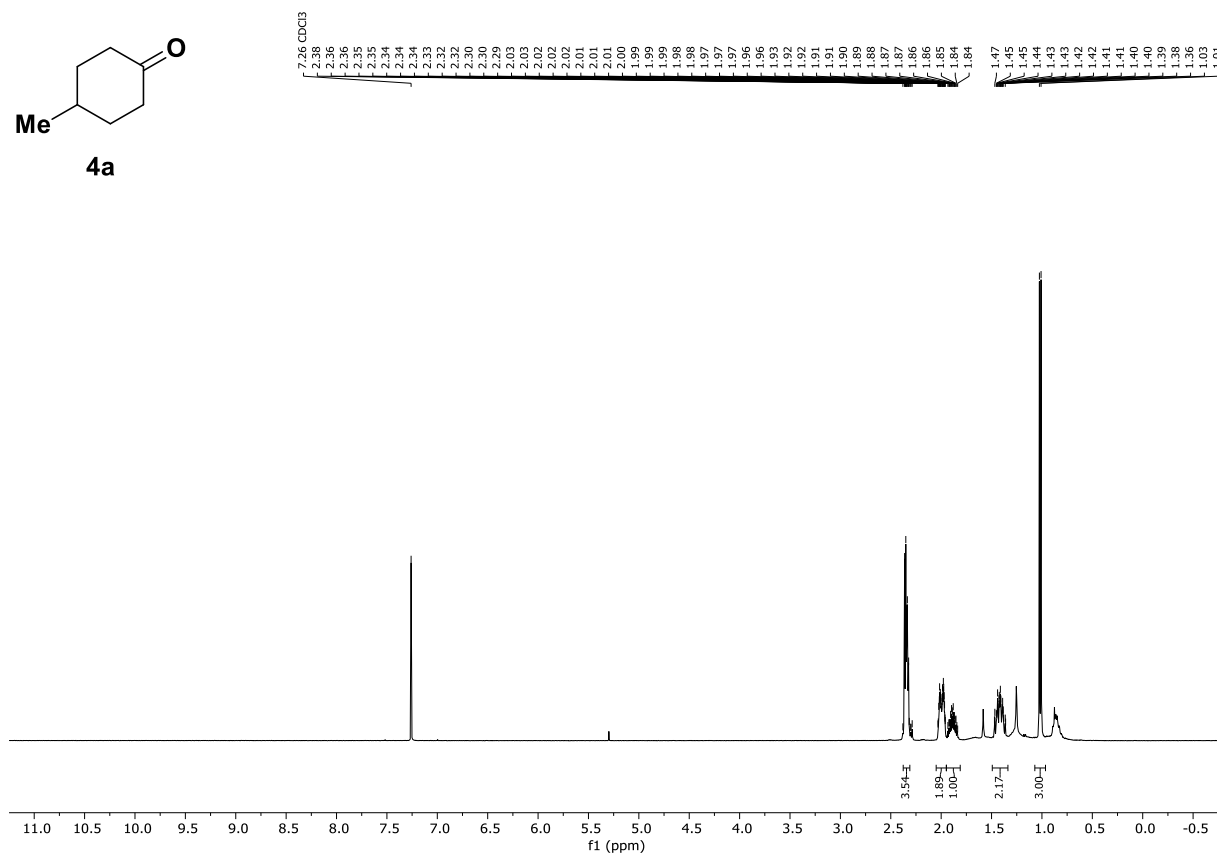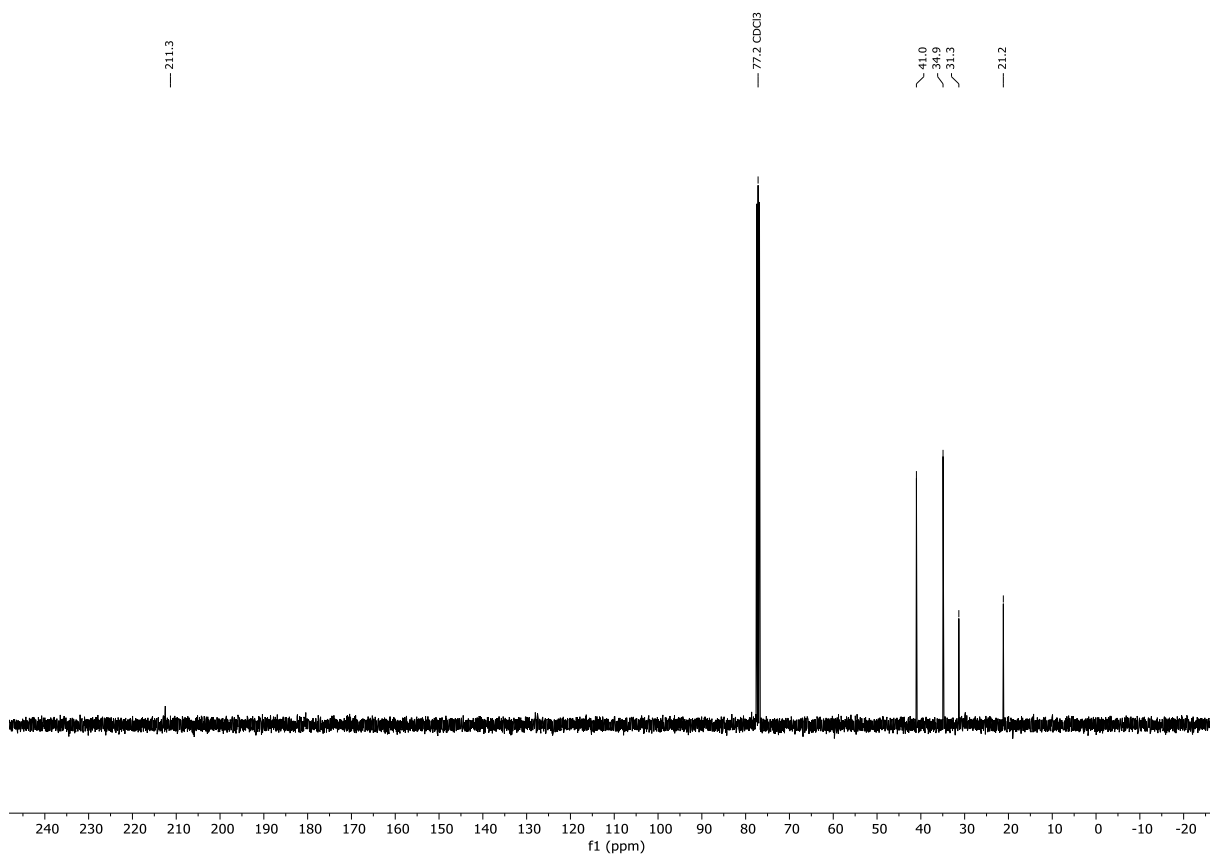

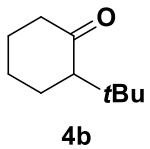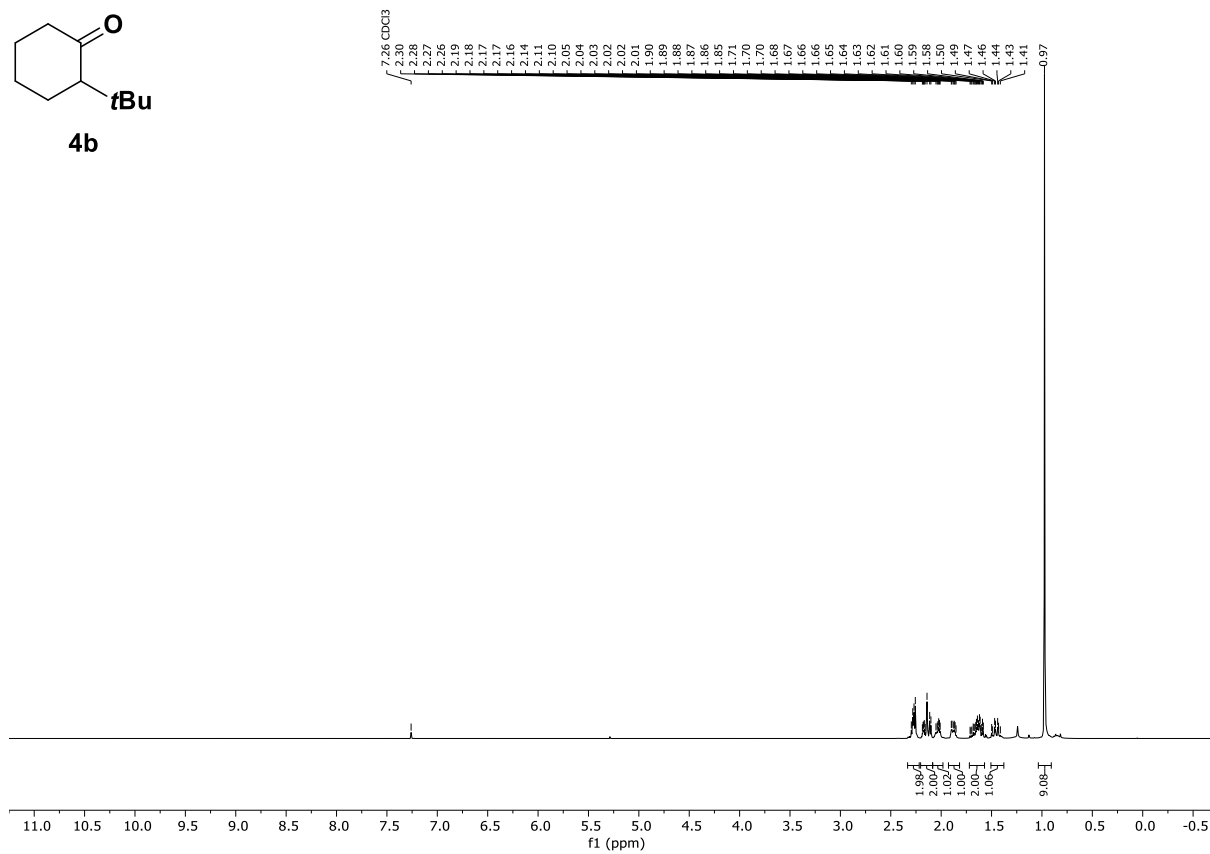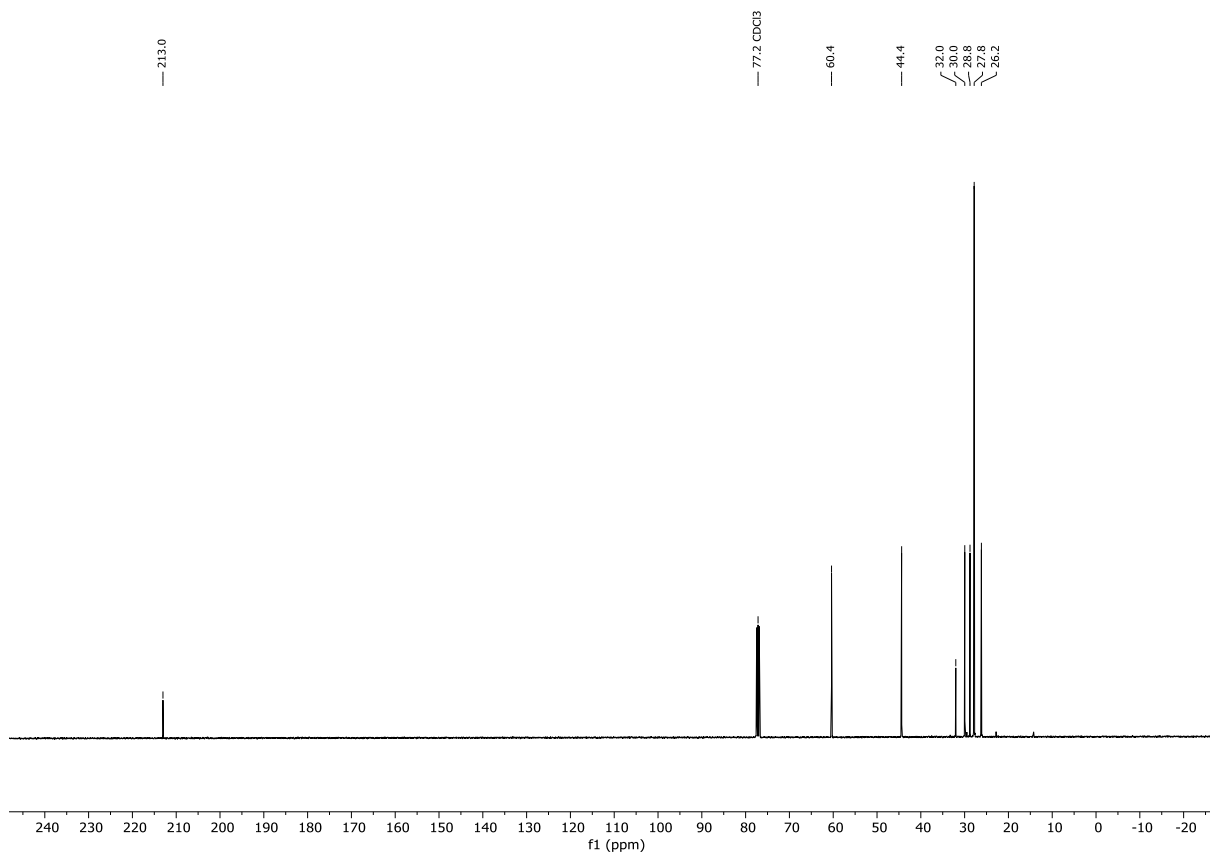

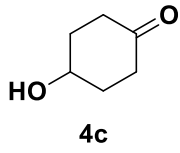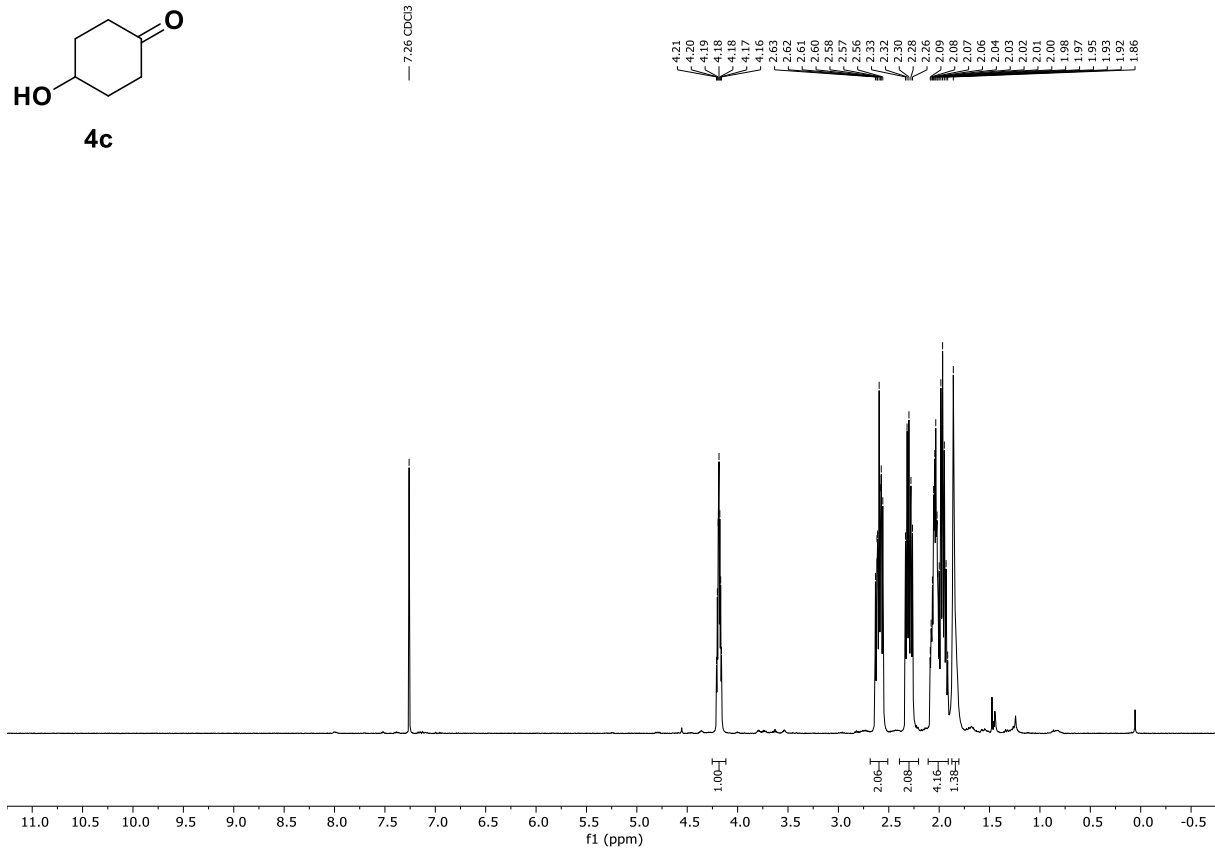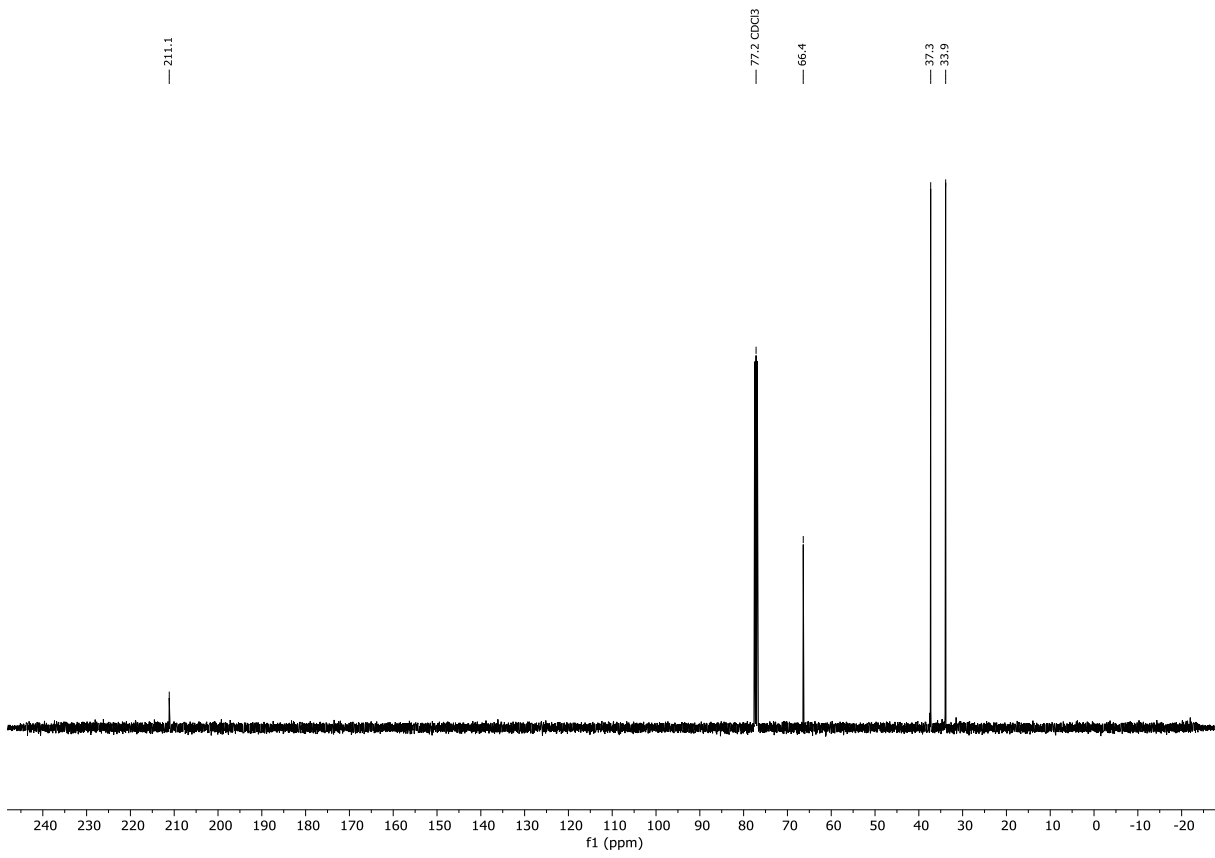

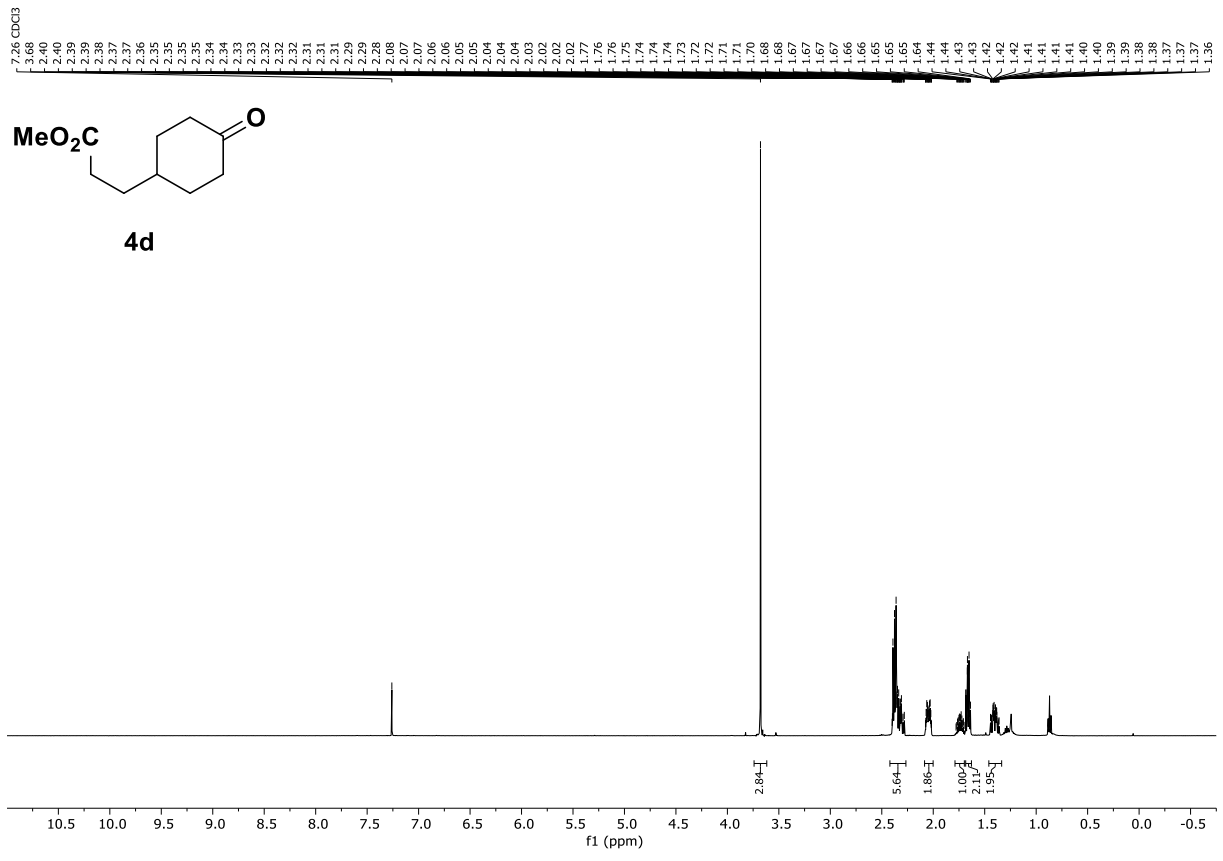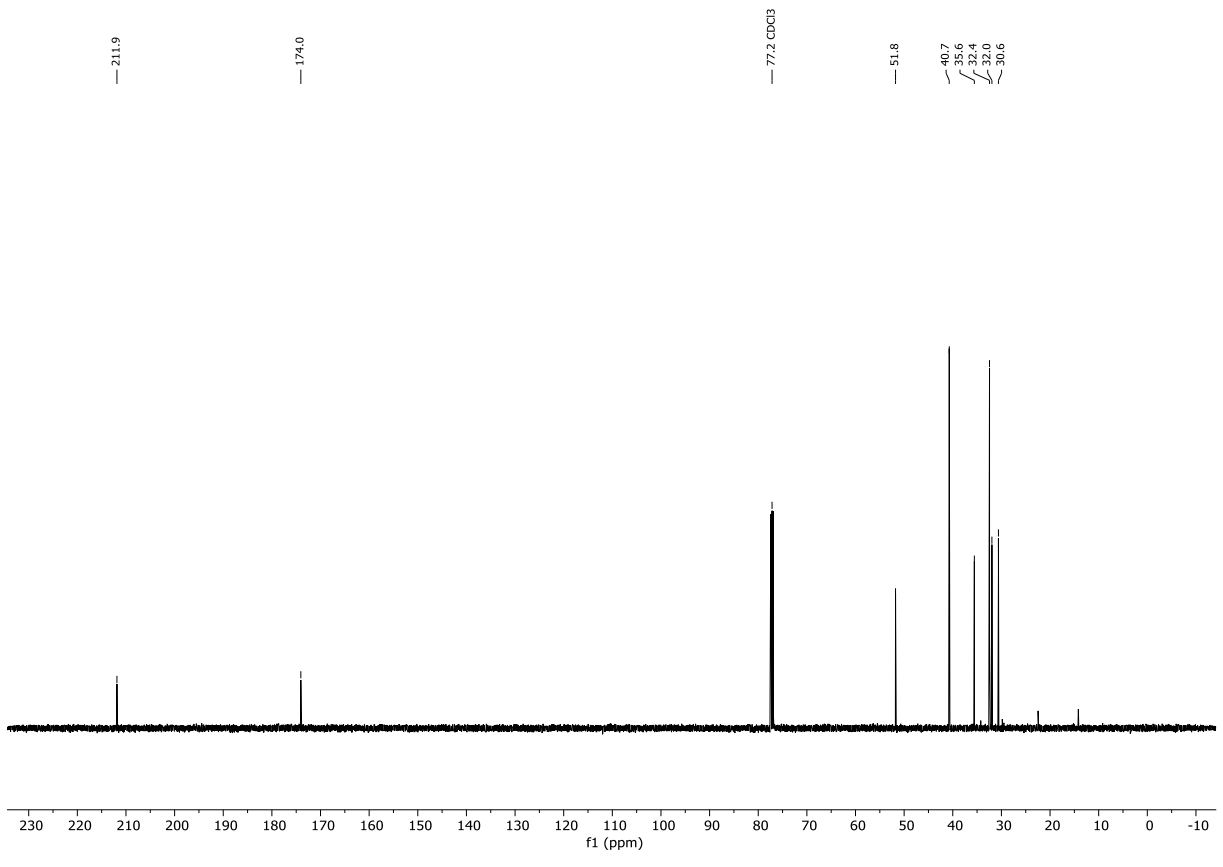

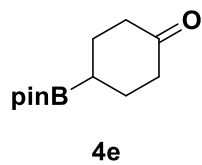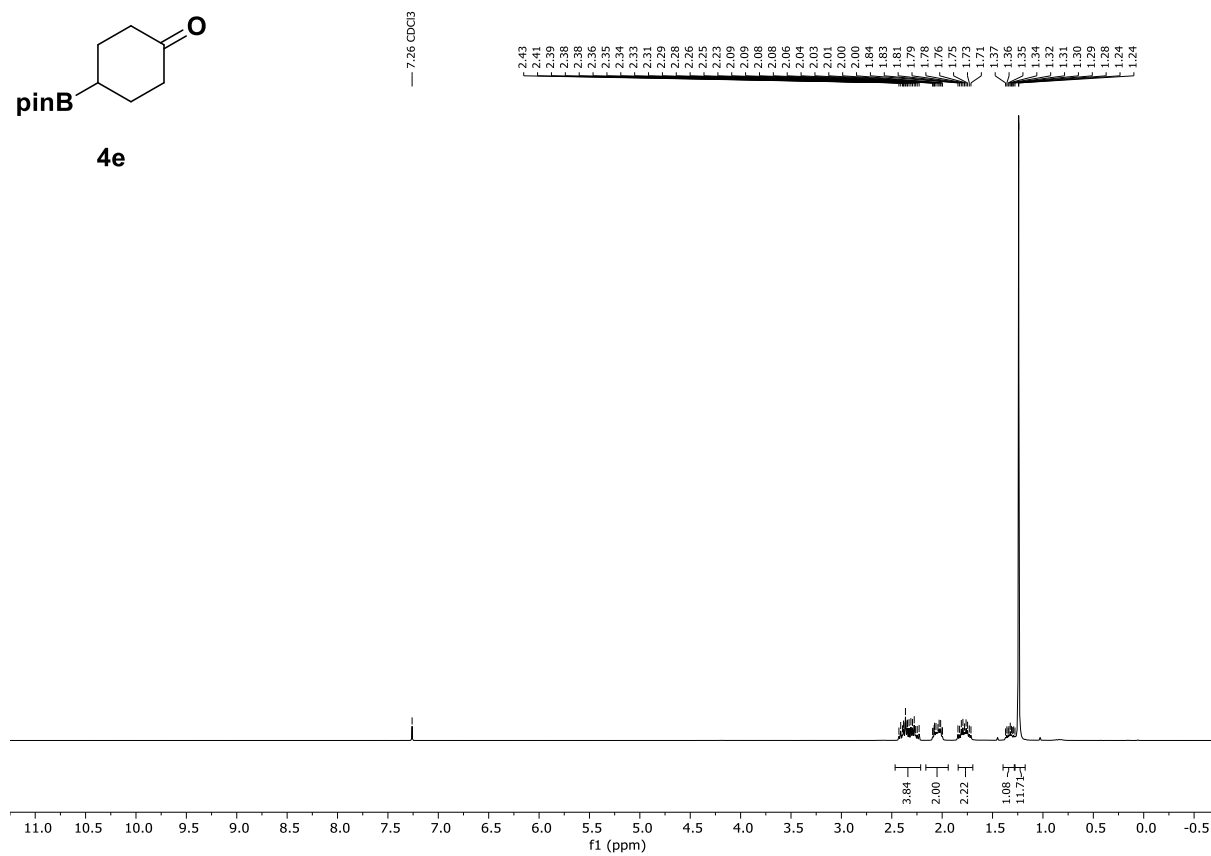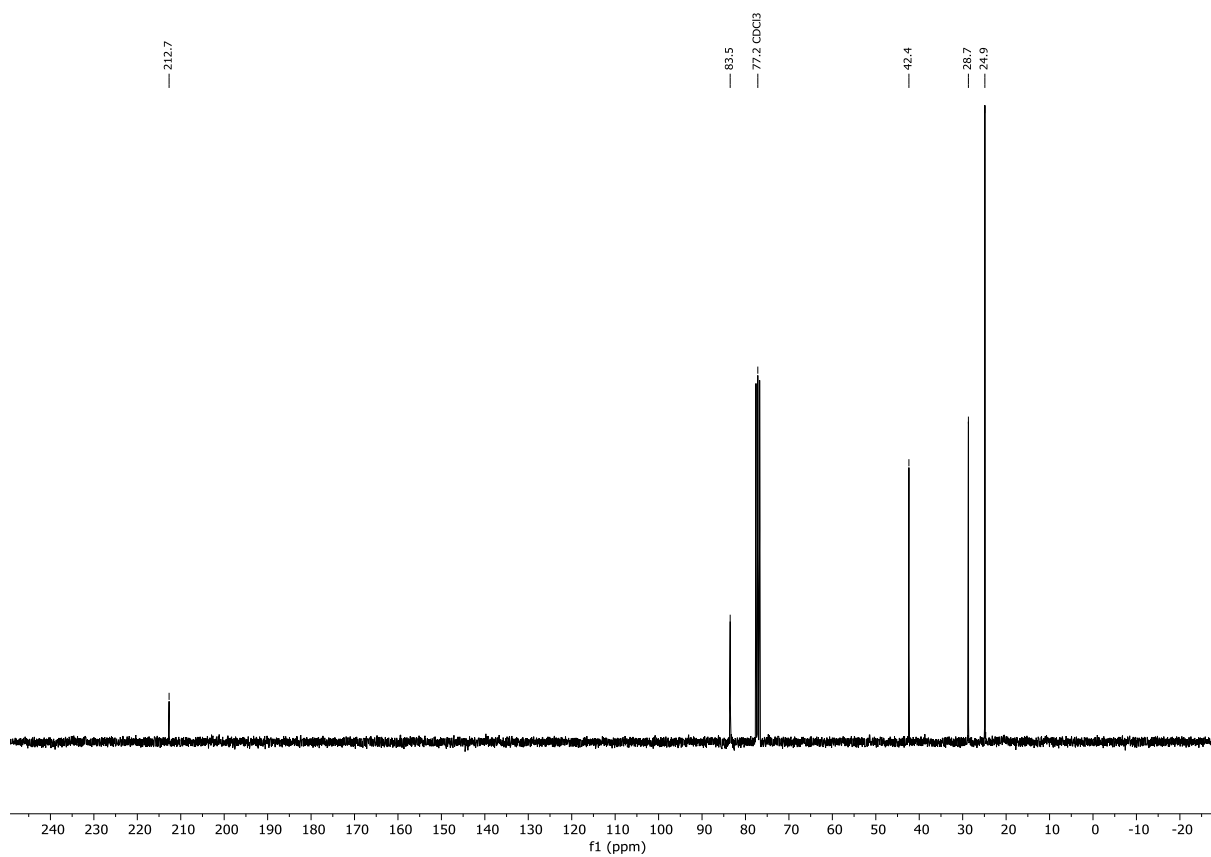

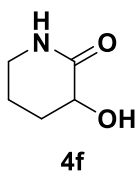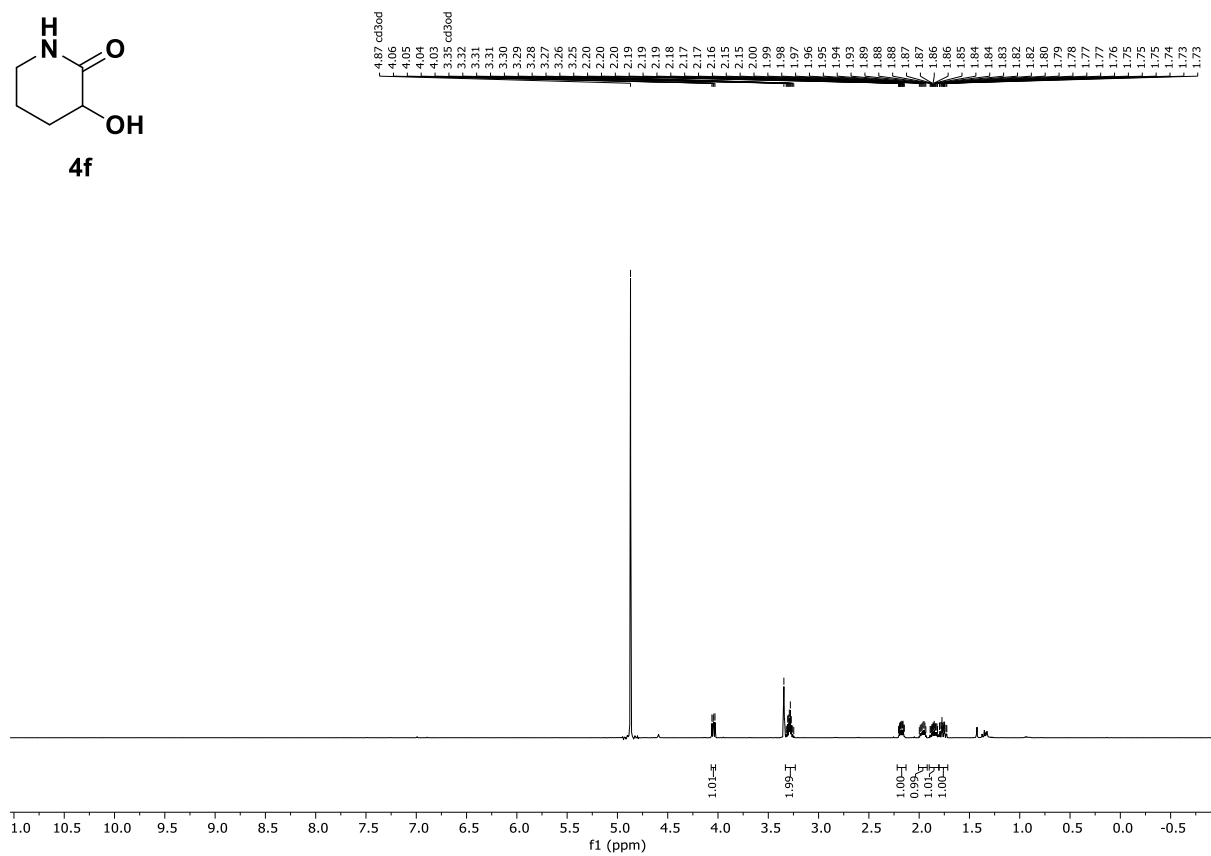

4.67 cd3od  
4.06  
4.04  
4.04  
4.03  
3.35 cd3od  
3.31  
3.31  
3.30  
3.29  
3.28  
3.27  
3.26  
3.25  
2.20  
2.20  
2.19  
2.19  
2.19  
2.19  
2.17  
2.17  
2.16  
2.15  
2.15  
2.00  
1.99  
1.98  
1.97  
1.96  
1.95  
1.94  
1.94  
1.93  
1.89  
1.88  
1.88  
1.87  
1.87  
1.86  
1.86  
1.85  
1.84  
1.84  
1.83  
1.82  
1.82  
1.80  
1.79  
1.78  
1.77  
1.77  
1.76  
1.76  
1.75  
1.75  
1.74  
1.74  
1.73  
1.73

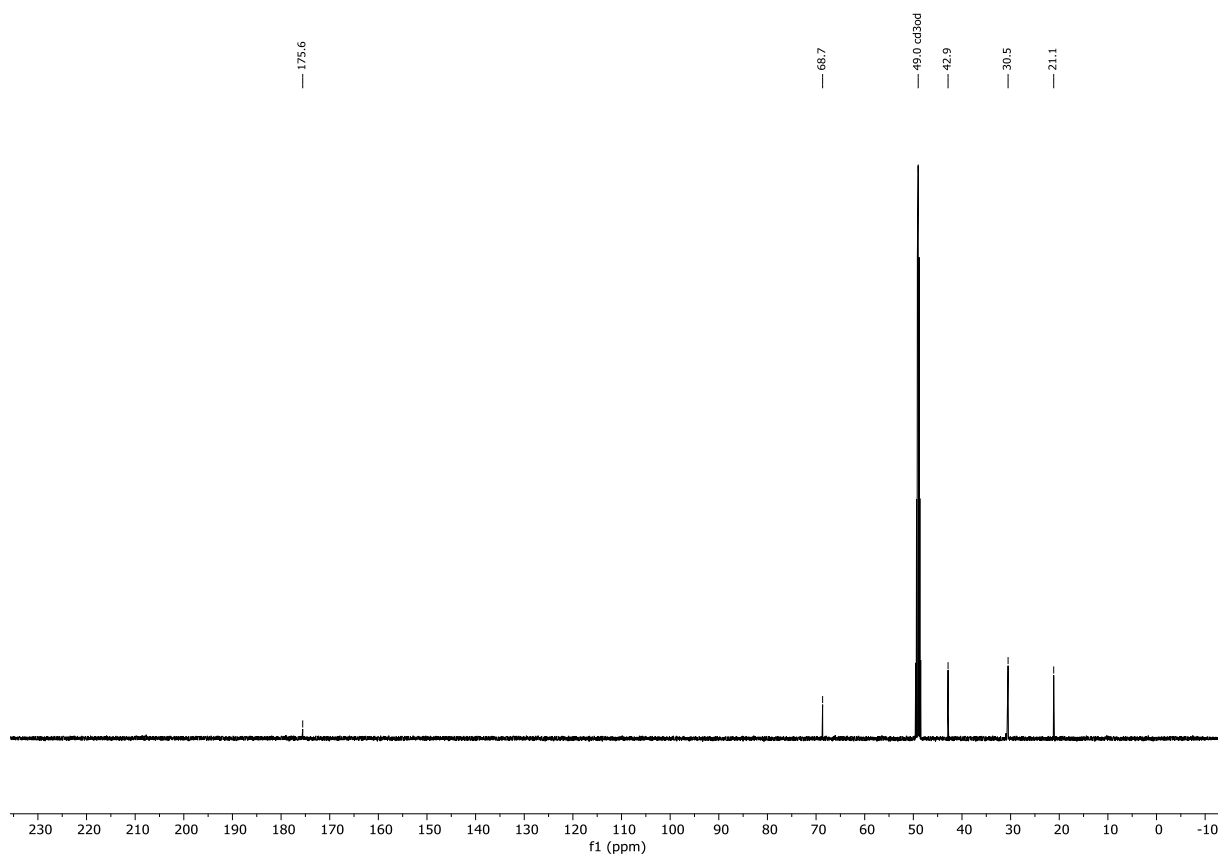

# 11.4 Application

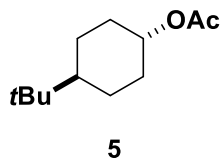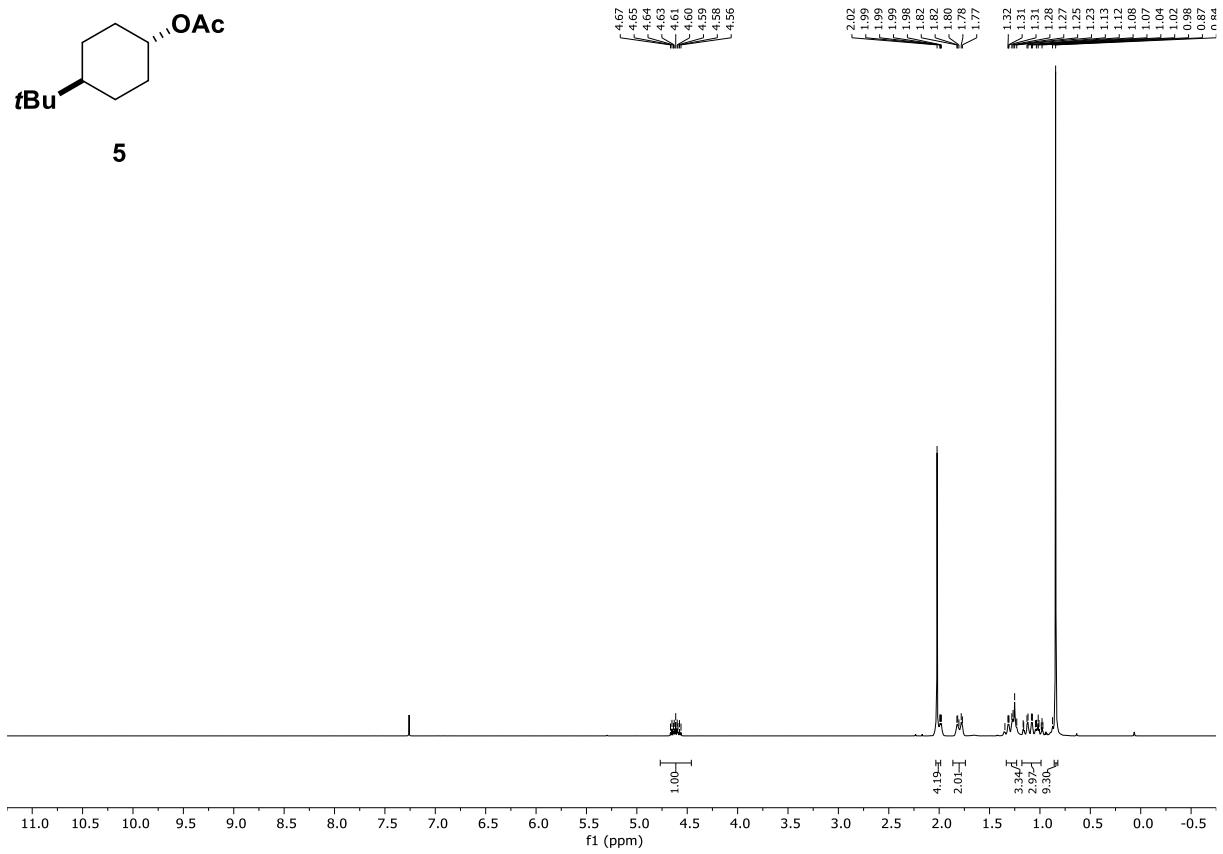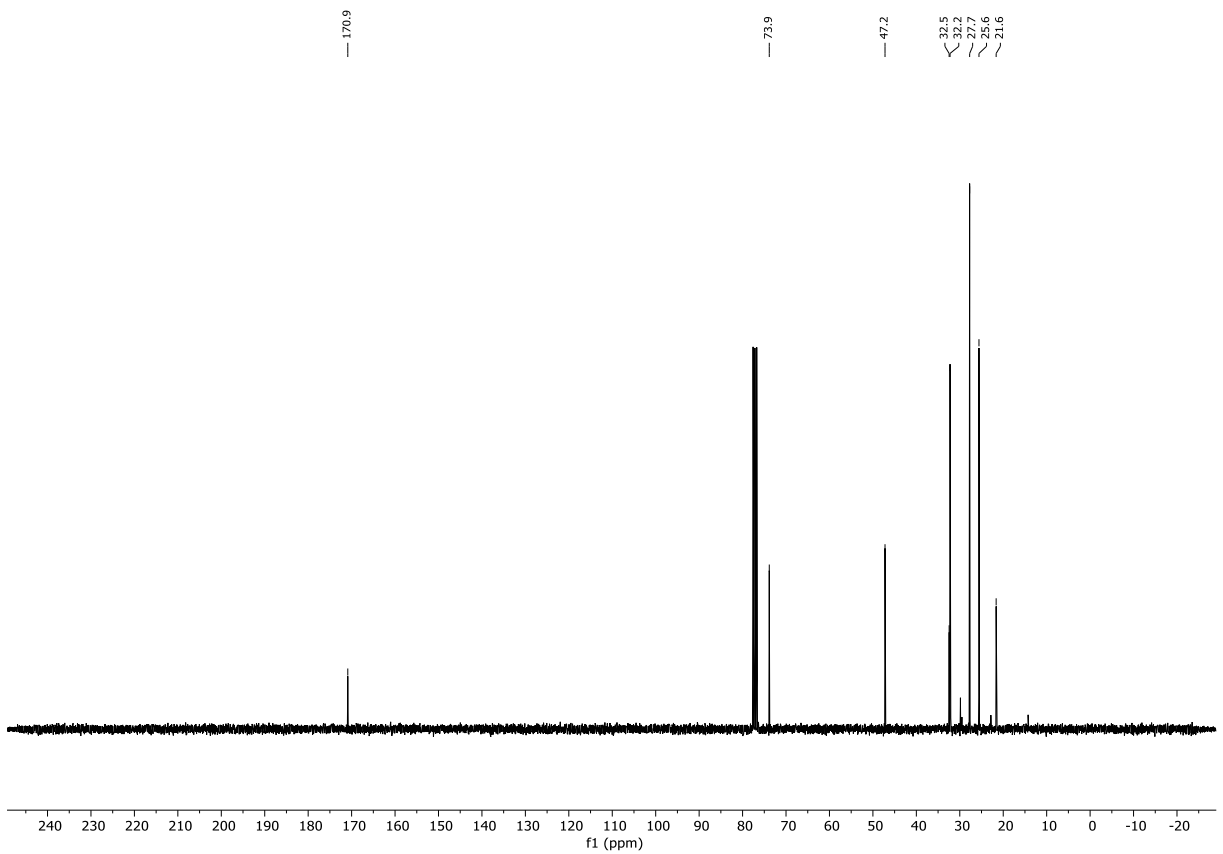



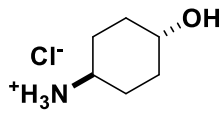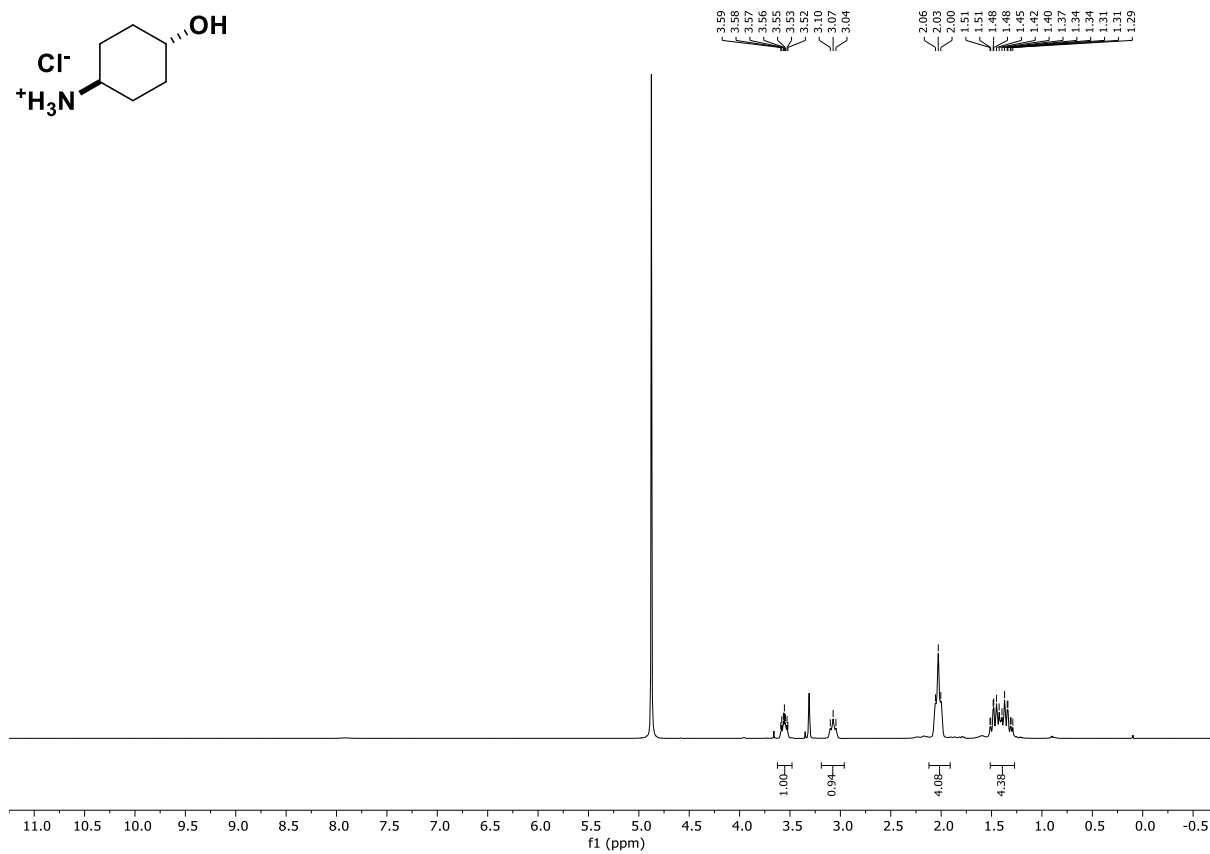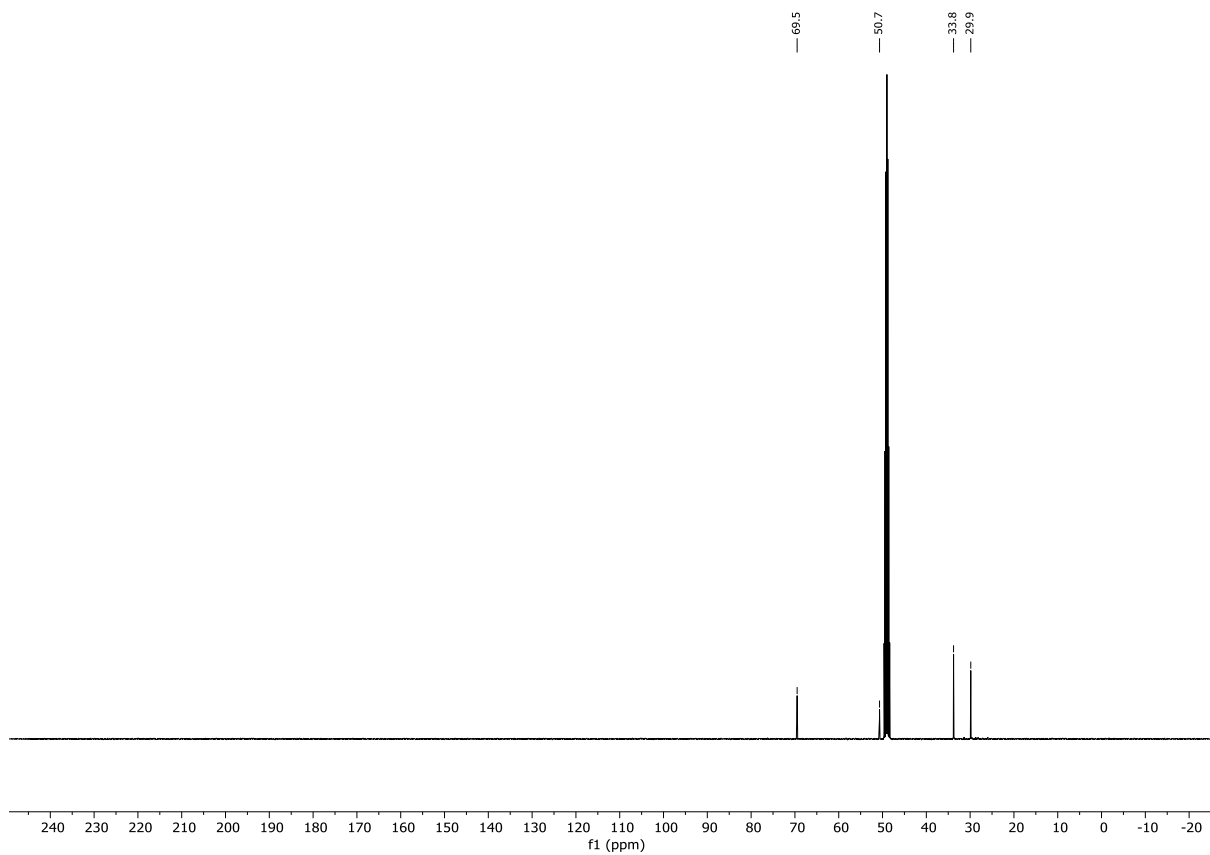

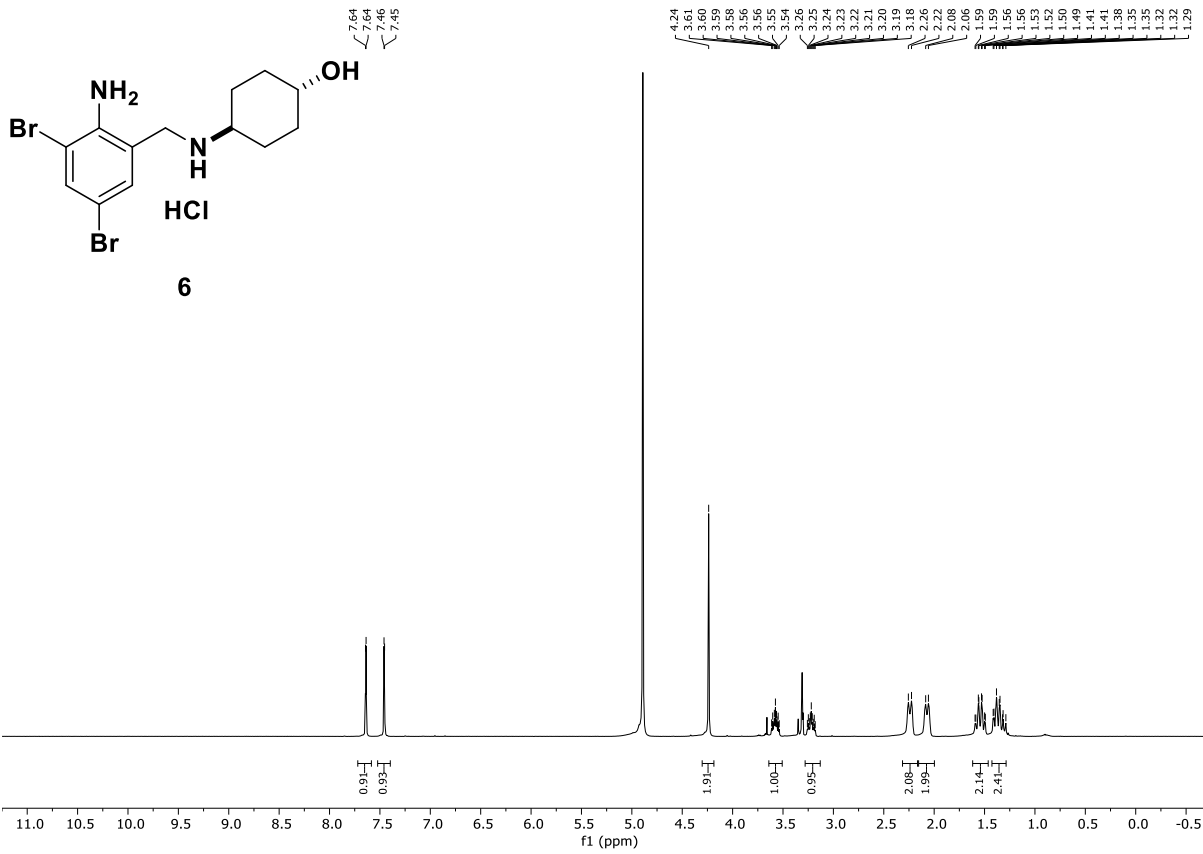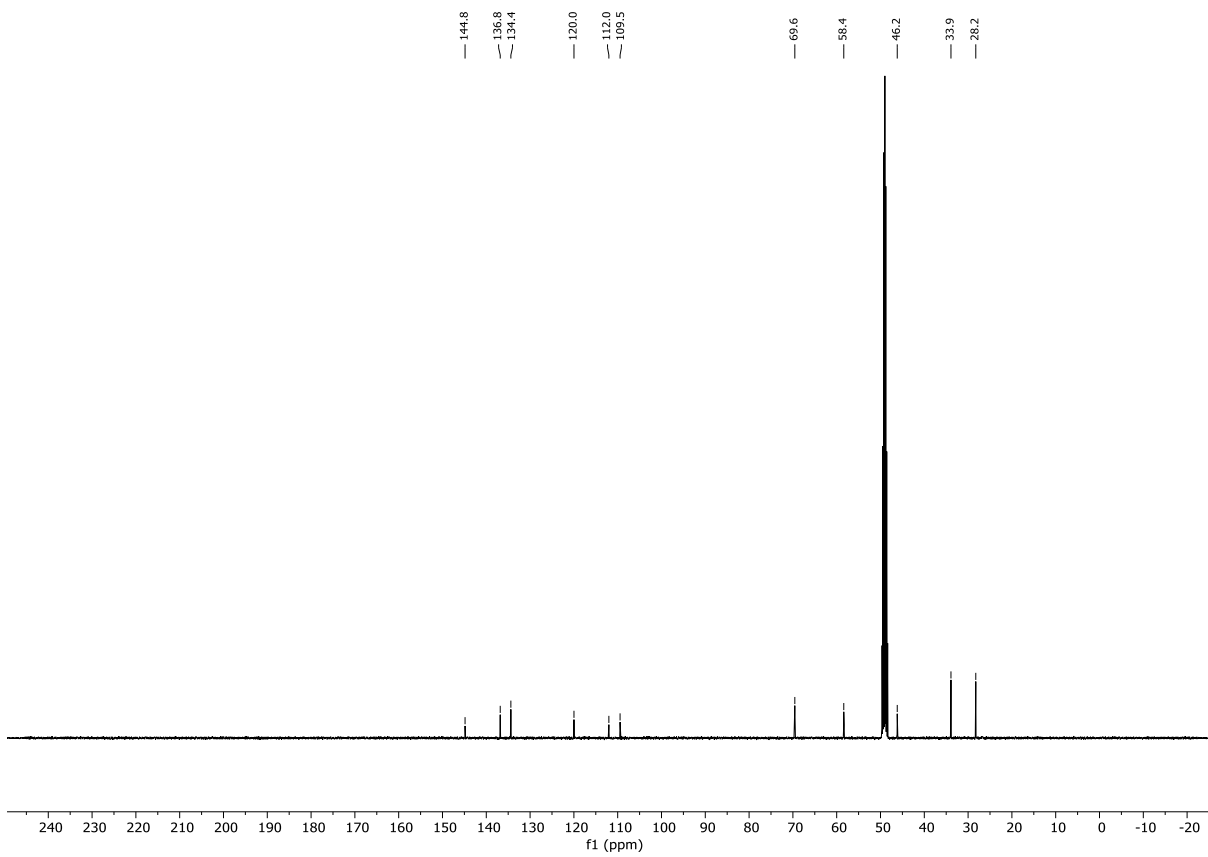

Supplement: cs0c03423_si_001.pdf [file cs0c03423_si_001.pdf]
